# Supplementary material for: DePARylation is critical for S phase progression and cell survival
Source: bioRxiv preprint, doi:10.1101/2023.07.31.551317, version 3 (2024-02-02)
Supplement: Supplementary File [file 551317_file18.xlsx]

## Sheet: Supplementary File 1a 
GENE	sumZ	numObs	normZ	pval_synth	rank_synth	fdr_synth	pval_supp	rank_supp	fdr_supp
PARG	-168.57	30	-10.36	1.81e-25	1	8.32e-23	1	460	1
POLB	-108.94	30	-6.64	1.53e-11	2	3.53e-09	1	459	1
POLE3	-103.86	30	-6.33	1.25e-10	3	1.92e-08	1	458	1
EXO1	-94.99	30	-5.77	3.89e-09	4	4.48e-07	1	457	1
POLE4	-85.47	30	-5.18	1.11e-07	5	1.03e-05	1	456	1
RTEL1	-54.39	30	-3.24	0.000598	6	0.0458	0.999	455	1
BLM	-40.33	30	-2.36	0.00908	7	0.597	0.991	454	1
WDR48	-39.36	30	-2.3	0.0107	8	0.613	0.989	453	1
PCNA	-32.03	30	-1.84	0.0325	9	0.899	0.967	452	0.985
PIF1	-31.64	30	-1.82	0.0344	10	0.899	0.966	451	0.985
LIG1	-28.75	30	-1.64	0.0505	11	0.899	0.949	450	0.971
RFC1	-27.93	30	-1.59	0.056	12	0.899	0.944	449	0.967
RMI2	-27.76	30	-1.58	0.0572	13	0.899	0.943	448	0.967
GEN1	-27.74	30	-1.58	0.0574	14	0.899	0.943	447	0.967
TYMS	-26.44	30	-1.5	0.0673	15	0.899	0.933	446	0.962
NBN	-25.63	30	-1.45	0.0742	16	0.899	0.926	445	0.957
SPRTN	-25.47	30	-1.44	0.0756	17	0.899	0.924	444	0.957
SMC6	-23.35	30	-1.3	0.0963	18	0.899	0.904	443	0.938
PTEN	-23.2	30	-1.29	0.0979	19	0.899	0.902	442	0.938
RAD18	-22.53	30	-1.25	0.105	20	0.899	0.895	441	0.933
DCLRE1B	-21.36	30	-1.18	0.119	21	0.899	0.881	440	0.921
PRIM2	-21.03	30	-1.16	0.123	22	0.899	0.877	439	0.919
HELQ	-20.85	30	-1.15	0.126	23	0.899	0.874	438	0.918
USP1	-20.73	30	-1.14	0.127	24	0.899	0.873	437	0.918
CDC25B	-19.79	30	-1.08	0.14	25	0.899	0.86	436	0.907
TOPBP1	-19.53	30	-1.07	0.143	26	0.899	0.857	435	0.906
FANCM	-19.35	30	-1.05	0.146	27	0.899	0.854	434	0.905
RPA2	-19.34	30	-1.05	0.146	28	0.899	0.854	433	0.905
F13B	-19.31	30	-1.05	0.147	29	0.899	0.853	432	0.905
RMI1	-19.15	30	-1.04	0.149	30	0.899	0.851	431	0.905
EIF2S1	-18.93	30	-1.03	0.152	31	0.899	0.848	430	0.905
PRIM1	-18.87	30	-1.02	0.153	32	0.899	0.847	429	0.905
RFWD3	-18.13	30	-0.98	0.164	33	0.899	0.836	428	0.898
BRIP1	-17.54	30	-0.94	0.173	34	0.899	0.827	427	0.89
LIG4	-17.37	30	-0.93	0.176	35	0.899	0.824	426	0.89
WRN	-17.27	30	-0.92	0.178	36	0.899	0.822	425	0.89
TTK	-17.16	30	-0.92	0.18	37	0.899	0.82	424	0.89
UBE2T	-17.12	30	-0.91	0.18	38	0.899	0.82	423	0.89
HUS1	-17.04	30	-0.91	0.182	39	0.899	0.818	422	0.89
RPA1	-17	30	-0.91	0.182	40	0.899	0.818	421	0.89
FAAP100	-16.09	30	-0.85	0.198	41	0.899	0.802	420	0.879
DNA2	-15.88	30	-0.84	0.201	42	0.899	0.799	419	0.877
HFM1	-15.66	30	-0.82	0.205	43	0.899	0.795	418	0.875
FANCC	-15.47	30	-0.81	0.208	44	0.899	0.792	417	0.873
RAD23B	-15.42	30	-0.81	0.21	45	0.899	0.79	416	0.873
SETDB1	-15.33	30	-0.8	0.211	46	0.899	0.789	415	0.873
ATP6V1A	-14.99	30	-0.78	0.217	47	0.899	0.783	414	0.87
RNF8	-14.92	30	-0.78	0.219	48	0.899	0.781	413	0.87
RAD1	-14.77	30	-0.77	0.221	49	0.899	0.779	412	0.869
UIMC1	-14.62	30	-0.76	0.224	50	0.899	0.776	411	0.868
UBE2N	-13.49	27	-0.73	0.232	51	0.899	0.768	410	0.862
UBE2V2	-12.69	24	-0.73	0.232	52	0.899	0.768	409	0.862
POLI	-14.16	30	-0.73	0.233	53	0.899	0.767	408	0.862
POLR3C	-13.64	30	-0.7	0.243	54	0.899	0.757	407	0.856
PLA2G2F	-13.63	30	-0.7	0.243	55	0.899	0.757	406	0.856
XRCC5	-13.63	30	-0.7	0.243	56	0.899	0.757	405	0.856
RAD17	-13.28	30	-0.68	0.25	57	0.899	0.75	404	0.854
MDM2	-13.19	30	-0.67	0.252	58	0.899	0.748	403	0.854
RAD51C	-13.07	30	-0.66	0.254	59	0.899	0.746	402	0.853
PPP4R1	-12.72	30	-0.64	0.261	60	0.899	0.739	401	0.848
BRCA1	-12.59	30	-0.63	0.264	61	0.899	0.736	400	0.847
MLH3	-12.55	30	-0.63	0.265	62	0.899	0.735	399	0.847
ZRANB3	-12.49	30	-0.63	0.266	63	0.899	0.734	398	0.847
ARCN1	-12.43	30	-0.62	0.267	64	0.899	0.733	397	0.847
SERPINB12	-12.36	30	-0.62	0.269	65	0.899	0.731	396	0.847
TSSK1B	-12.2	30	-0.61	0.272	66	0.899	0.728	395	0.847
MSH5	-12.17	30	-0.61	0.272	67	0.899	0.728	394	0.847
FANCD2	-12.02	30	-0.6	0.276	68	0.899	0.724	393	0.847
CUL5	-11.95	30	-0.59	0.277	69	0.899	0.723	392	0.847
TOP1	-11.94	30	-0.59	0.277	70	0.899	0.723	391	0.847
NPM1	-3.77	3	-0.59	0.278	71	0.899	0.722	390	0.847
NABP1	-11.79	30	-0.58	0.28	72	0.899	0.72	389	0.847
DCLRE1A	-11.73	30	-0.58	0.282	73	0.899	0.718	388	0.847
UBE2A	-11.6	30	-0.57	0.284	74	0.899	0.716	387	0.847
PARPBP	-11.44	30	-0.56	0.288	75	0.899	0.712	386	0.847
ENDOV	-11.23	30	-0.55	0.292	76	0.899	0.708	385	0.846
HSP90AA1	-11.11	30	-0.54	0.295	77	0.899	0.705	384	0.845
TPH2	-10.99	30	-0.53	0.297	78	0.899	0.703	383	0.844
FEN1	-10.92	30	-0.53	0.299	79	0.899	0.701	382	0.844
FANCL	-10.86	30	-0.52	0.3	80	0.899	0.7	381	0.844
MBD4	-10.72	30	-0.51	0.303	81	0.899	0.697	380	0.843
ASCC1	-10.7	30	-0.51	0.304	82	0.899	0.696	379	0.843
GLRA2	-10.68	30	-0.51	0.304	83	0.899	0.696	378	0.843
RFC3	-10.65	30	-0.51	0.305	84	0.899	0.695	377	0.843
FANCA	-10.59	30	-0.51	0.306	85	0.899	0.694	376	0.843
MMS22L	-10.56	30	-0.51	0.307	86	0.899	0.693	375	0.843
ETAA1	-10.53	30	-0.5	0.307	87	0.899	0.693	374	0.843
PRKDC	-10.2	30	-0.48	0.315	88	0.899	0.685	373	0.843
SLC13A1	-10.11	30	-0.48	0.317	89	0.899	0.683	372	0.843
MCM5	-10.08	30	-0.48	0.317	90	0.899	0.683	371	0.843
TIMELESS	-10.02	30	-0.47	0.319	91	0.899	0.681	370	0.843
BABAM2	-9.93	30	-0.47	0.321	92	0.899	0.679	369	0.843
BMP15	-9.8	30	-0.46	0.324	93	0.899	0.676	368	0.843
SCAI	-9.68	30	-0.45	0.326	94	0.899	0.674	367	0.843
ERI2	-9.66	30	-0.45	0.327	95	0.899	0.673	366	0.843
SLC36A3	-9.58	30	-0.44	0.329	96	0.899	0.671	365	0.843
PPP4C	-9.5	30	-0.44	0.33	97	0.899	0.67	364	0.843
FAAP24	-9.3	30	-0.43	0.335	98	0.899	0.665	363	0.843
SWI5	-9.26	30	-0.42	0.336	99	0.899	0.664	362	0.843
ALDH18A1	-9.23	30	-0.42	0.336	100	0.899	0.664	361	0.843
ALKBH3	-9.21	30	-0.42	0.337	101	0.899	0.663	360	0.843
DGAT2L6	-9.14	30	-0.42	0.338	102	0.899	0.662	359	0.843
ADH7	-9.1	30	-0.41	0.339	103	0.899	0.661	358	0.843
RAD50	-8.82	30	-0.4	0.346	104	0.899	0.654	357	0.843
WRNIP1	-8.76	30	-0.39	0.347	105	0.899	0.653	356	0.843
DCLRE1C	-8.73	30	-0.39	0.348	106	0.899	0.652	355	0.843
DNTT	-8.67	30	-0.39	0.349	107	0.899	0.651	354	0.843
INIP	-6.12	15	-0.39	0.35	108	0.899	0.65	353	0.843
ATM	-8.5	30	-0.38	0.353	109	0.899	0.647	352	0.843
BRCC3	-8.44	30	-0.37	0.355	110	0.899	0.645	351	0.843
CHTF18	-8.29	30	-0.36	0.358	111	0.899	0.642	350	0.843
FANCB	-8.28	30	-0.36	0.358	112	0.899	0.642	349	0.843
CLDN17	-8.06	30	-0.35	0.364	113	0.899	0.636	348	0.841
ERCC6	-7.96	30	-0.34	0.366	114	0.899	0.634	347	0.841
ALDH9A1	-7.7	30	-0.33	0.372	115	0.899	0.628	346	0.835
ERCC4	-7.62	30	-0.32	0.374	116	0.899	0.626	345	0.835
H2AFX	-7.59	30	-0.32	0.374	117	0.899	0.626	344	0.835
RDM1	-7.55	30	-0.32	0.376	118	0.899	0.624	343	0.835
ERCC6L	-7.48	30	-0.31	0.377	119	0.899	0.623	342	0.835
SOX4	-7.46	30	-0.31	0.378	120	0.899	0.622	341	0.835
PPP3R2	-7.46	30	-0.31	0.378	121	0.899	0.622	340	0.835
CST9	-7.23	30	-0.3	0.383	122	0.899	0.617	339	0.835
REV3L	-7.16	30	-0.29	0.385	123	0.899	0.615	338	0.835
NEIL3	-7.01	30	-0.28	0.388	124	0.899	0.612	337	0.835
POLL	-6.99	30	-0.28	0.389	125	0.899	0.611	336	0.835
ALDH8A1	-6.96	30	-0.28	0.39	126	0.899	0.61	335	0.835
FIGNL1	-6.94	30	-0.28	0.39	127	0.899	0.61	334	0.835
CXorf66	-6.93	30	-0.28	0.39	128	0.899	0.61	333	0.835
PPP4R2	-2.19	3	-0.28	0.391	129	0.899	0.609	332	0.835
CDK7	-6.91	30	-0.28	0.391	130	0.899	0.609	331	0.835
TOP3B	-6.82	30	-0.27	0.393	131	0.899	0.607	330	0.835
ORAOV1	-6.76	30	-0.27	0.394	132	0.899	0.606	329	0.835
REV1	-6.68	30	-0.26	0.396	133	0.899	0.604	328	0.835
CHD2	-6.49	30	-0.25	0.401	134	0.899	0.599	327	0.835
AEN	-6.44	30	-0.25	0.402	135	0.899	0.598	326	0.835
LUC7L3	-6.42	30	-0.25	0.403	136	0.899	0.597	325	0.835
BHLHE40	-6.34	30	-0.24	0.404	137	0.899	0.596	324	0.835
PMS1	-6.26	30	-0.24	0.406	138	0.899	0.594	323	0.835
FANCF	-6.21	30	-0.23	0.408	139	0.899	0.592	322	0.835
WDR43	-6.2	30	-0.23	0.408	140	0.899	0.592	321	0.835
GRB2	-6.19	30	-0.23	0.408	141	0.899	0.592	320	0.835
RFC5	-6.16	30	-0.23	0.409	142	0.899	0.591	319	0.835
HLTF	-6.12	30	-0.23	0.41	143	0.899	0.59	318	0.835
NSMCE2	-6.12	30	-0.23	0.41	144	0.899	0.59	317	0.835
ELOB	-5.79	30	-0.21	0.418	145	0.899	0.582	316	0.835
T	-5.74	30	-0.2	0.419	146	0.899	0.581	315	0.835
GADD45A	-5.71	30	-0.2	0.42	147	0.899	0.58	314	0.835
NUP133	-5.7	30	-0.2	0.42	148	0.899	0.58	313	0.835
CDC25A	-5.63	30	-0.2	0.422	149	0.899	0.578	312	0.835
CDC25C	-5.62	30	-0.2	0.422	150	0.899	0.578	311	0.835
GTF2H3	-5.54	30	-0.19	0.424	151	0.899	0.576	310	0.835
FANCG	-5.47	30	-0.19	0.426	152	0.899	0.574	309	0.835
RB1	-5.41	30	-0.18	0.427	153	0.899	0.573	308	0.835
APOBEC1	-5.36	30	-0.18	0.428	154	0.899	0.572	307	0.835
ATR	-5.34	30	-0.18	0.429	155	0.899	0.571	306	0.835
RAD54B	-5.33	30	-0.18	0.429	156	0.899	0.571	305	0.835
LMNA	-5.28	30	-0.18	0.43	157	0.899	0.57	304	0.835
ALDH4A1	-5.28	30	-0.18	0.43	158	0.899	0.57	303	0.835
PARP2	-5.22	30	-0.17	0.432	159	0.899	0.568	302	0.835
DNLZ	-5.21	30	-0.17	0.432	160	0.899	0.568	301	0.835
PAXIP1	-5.1	30	-0.16	0.435	161	0.899	0.565	300	0.835
XPC	-5.04	30	-0.16	0.436	162	0.899	0.564	299	0.835
BCAS2	-4.95	30	-0.16	0.438	163	0.899	0.562	298	0.835
RRM1	-4.92	30	-0.15	0.439	164	0.899	0.561	297	0.835
SETMAR	-4.78	30	-0.14	0.442	165	0.899	0.558	296	0.835
BARD1	-4.78	30	-0.14	0.442	166	0.899	0.558	295	0.835
MSH6	-4.71	30	-0.14	0.444	167	0.899	0.556	294	0.835
CCT7	-4.6	30	-0.13	0.447	168	0.899	0.553	293	0.835
DMC1	-4.5	30	-0.13	0.449	169	0.899	0.551	292	0.835
SPO11	-4.49	30	-0.13	0.45	170	0.899	0.55	291	0.835
NSMCE1	-4.46	30	-0.12	0.45	171	0.899	0.55	290	0.835
POLE2	-4.45	30	-0.12	0.451	172	0.899	0.549	289	0.835
SHPRH	-4.45	30	-0.12	0.451	173	0.899	0.549	288	0.835
POLH	-4.4	30	-0.12	0.452	174	0.899	0.548	287	0.835
GPX6	-4.28	30	-0.11	0.455	175	0.899	0.545	286	0.835
PPP4R4	-4.27	30	-0.11	0.455	176	0.899	0.545	285	0.835
FANCE	-4.22	30	-0.11	0.456	177	0.899	0.544	284	0.835
GTF2H5	-3.71	24	-0.1	0.458	178	0.899	0.542	283	0.835
ALDH1A2	-3.79	30	-0.08	0.467	179	0.899	0.533	282	0.835
MNAT1	-3.77	30	-0.08	0.468	180	0.899	0.532	281	0.835
TONSL	-3.73	30	-0.08	0.468	181	0.899	0.532	280	0.835
RNF168	-3.7	30	-0.08	0.469	182	0.899	0.531	279	0.835
RECQL4	-3.61	30	-0.07	0.471	183	0.899	0.529	278	0.835
ALDH1A1	-3.57	30	-0.07	0.472	184	0.899	0.528	277	0.835
OGG1	-3.56	30	-0.07	0.473	185	0.899	0.527	276	0.835
ATRX	-3.45	30	-0.06	0.476	186	0.899	0.524	275	0.835
ELOA	-3.44	30	-0.06	0.476	187	0.899	0.524	274	0.835
MRPL40	-3.41	30	-0.06	0.476	188	0.899	0.524	273	0.835
MMS19	-3.41	30	-0.06	0.476	189	0.899	0.524	272	0.835
RFC2	-3.39	30	-0.06	0.477	190	0.899	0.523	271	0.835
INTS3	-3.38	30	-0.06	0.477	191	0.899	0.523	270	0.835
GABRA1	-3.38	30	-0.06	0.477	192	0.899	0.523	269	0.835
KITLG	-3.37	30	-0.06	0.478	193	0.899	0.522	268	0.835
PAXX	-3.29	30	-0.05	0.48	194	0.899	0.52	267	0.835
C1orf112	-3.22	30	-0.05	0.481	195	0.899	0.519	266	0.835
UNG	-3.22	30	-0.05	0.481	196	0.899	0.519	265	0.835
HMGB2	-3.17	30	-0.04	0.482	197	0.899	0.518	264	0.835
NTHL1	-3.16	30	-0.04	0.483	198	0.899	0.517	263	0.835
ALDH3B2	-3.15	30	-0.04	0.483	199	0.899	0.517	262	0.835
FAM35A	-3.1	30	-0.04	0.484	200	0.899	0.516	261	0.835
MCM2	-3.06	30	-0.04	0.485	201	0.899	0.515	260	0.835
NONO	-3	30	-0.03	0.487	202	0.899	0.513	259	0.835
RPA3	-2.84	30	-0.02	0.491	203	0.899	0.509	258	0.835
GADD45G	-2.73	30	-0.02	0.493	204	0.899	0.507	257	0.835
FANCI	-2.62	30	-0.01	0.496	205	0.899	0.504	256	0.835
RFC4	-2.57	30	-0.01	0.497	206	0.899	0.503	255	0.835
MEP1A	-2.34	30	0.01	0.503	207	0.899	0.497	254	0.835
MAD2L2	-2.33	30	0.01	0.503	208	0.899	0.497	253	0.835
ALKBH1	-2.32	30	0.01	0.504	209	0.899	0.496	252	0.835
ERCC1	-2.27	30	0.01	0.505	210	0.899	0.495	251	0.835
CDK1	-2.26	30	0.01	0.505	211	0.899	0.495	250	0.835
APLF	-2.12	30	0.02	0.509	212	0.899	0.491	249	0.835
SMARCC1	-2.04	30	0.03	0.511	213	0.899	0.489	248	0.835
NUDT16L1	-1.85	30	0.04	0.515	214	0.899	0.485	247	0.835
SUV39H1	-1.8	30	0.04	0.517	215	0.899	0.483	246	0.835
SMC5	-1.67	30	0.05	0.52	216	0.899	0.48	245	0.835
RRM2	-1.67	30	0.05	0.52	217	0.899	0.48	244	0.835
SERPINA7	-1.59	30	0.05	0.522	218	0.899	0.478	243	0.835
CDKN1A	-1.5	30	0.06	0.524	219	0.899	0.476	242	0.835
POLA1	-1.44	30	0.06	0.526	220	0.899	0.474	241	0.835
RPA4	-1.4	30	0.07	0.526	221	0.899	0.474	240	0.835
ALDH1L2	-1.39	30	0.07	0.527	222	0.899	0.473	239	0.835
POLD1	-1.39	30	0.07	0.527	223	0.899	0.473	238	0.835
CLK2	-1.36	30	0.07	0.527	224	0.899	0.473	237	0.835
GFRAL	-1.33	30	0.07	0.528	225	0.899	0.472	236	0.835
ALDH7A1	-1.07	30	0.09	0.535	226	0.899	0.465	235	0.835
MGMT	-1	30	0.09	0.536	227	0.899	0.464	234	0.835
CETN2	-0.91	30	0.1	0.539	228	0.899	0.461	233	0.835
NUDT1	-0.9	30	0.1	0.539	229	0.899	0.461	232	0.835
NDST4	-0.8	30	0.1	0.541	230	0.899	0.459	231	0.835
PRSS37	-0.73	30	0.11	0.543	231	0.899	0.457	230	0.835
CHEK2	-0.73	30	0.11	0.543	232	0.899	0.457	229	0.835
POLR2B	-0.72	30	0.11	0.543	233	0.899	0.457	228	0.835
CPSF3	-0.71	30	0.11	0.544	234	0.899	0.456	227	0.835
ESR1	-0.65	30	0.11	0.545	235	0.899	0.455	226	0.835
BACH1	-0.48	30	0.12	0.549	236	0.899	0.451	225	0.835
NSMCE3	-0.35	30	0.13	0.552	237	0.899	0.448	224	0.835
ALDH1B1	-0.26	30	0.14	0.555	238	0.899	0.445	223	0.835
RBBP8	-0.02	30	0.15	0.561	239	0.899	0.439	222	0.835
SFR1	0.01	15	0.15	0.562	240	0.899	0.438	221	0.835
MLH1	0.09	30	0.16	0.563	241	0.899	0.437	220	0.835
RNF138	0.11	30	0.16	0.564	242	0.899	0.436	219	0.835
DPAGT1	0.14	30	0.16	0.564	243	0.899	0.436	218	0.835
RAD9B	0.18	30	0.16	0.565	244	0.899	0.435	217	0.835
YWHAE	0.19	18	0.17	0.567	245	0.899	0.433	216	0.835
TRPC7	0.25	30	0.17	0.567	246	0.899	0.433	215	0.835
SFPQ	0.37	30	0.18	0.57	247	0.899	0.43	214	0.835
ASCC2	0.37	30	0.18	0.57	248	0.899	0.43	213	0.835
CCT2	0.43	30	0.18	0.572	249	0.899	0.428	212	0.835
RIF1	0.53	30	0.19	0.574	250	0.899	0.426	211	0.835
TKTL2	0.61	30	0.19	0.576	251	0.899	0.424	210	0.835
WDR3	0.62	30	0.19	0.576	252	0.899	0.424	209	0.835
APTX	0.83	30	0.21	0.582	253	0.899	0.418	208	0.835
XPA	0.86	30	0.21	0.582	254	0.899	0.418	207	0.835
RAD51D	0.9	30	0.21	0.583	255	0.899	0.417	206	0.835
KIF11	0.91	30	0.21	0.583	256	0.899	0.417	205	0.835
APEX1	0.97	30	0.21	0.585	257	0.899	0.415	204	0.835
CLRN1	1.04	30	0.22	0.587	258	0.899	0.413	203	0.835
POLR2E	1.15	30	0.23	0.589	259	0.899	0.411	202	0.835
POLQ	1.18	30	0.23	0.59	260	0.899	0.41	201	0.835
RNASEH2B	1.18	30	0.23	0.59	261	0.899	0.41	200	0.835
ABRAXAS1	1.22	30	0.23	0.591	262	0.899	0.409	199	0.835
YWHAB	1.24	30	0.23	0.591	263	0.899	0.409	198	0.835
NELFB	1.28	30	0.23	0.592	264	0.899	0.408	197	0.835
POLN	1.29	30	0.23	0.593	265	0.899	0.407	196	0.835
TRIM28	1.32	30	0.24	0.593	266	0.899	0.407	195	0.835
UBQLN3	1.34	30	0.24	0.594	267	0.899	0.406	194	0.835
CUL4A	1.35	30	0.24	0.594	268	0.899	0.406	193	0.835
ALDH6A1	1.37	30	0.24	0.594	269	0.899	0.406	192	0.835
PARP4	1.38	30	0.24	0.595	270	0.899	0.405	191	0.835
EID3	1.51	30	0.25	0.598	271	0.899	0.402	190	0.835
XRCC3	1.61	30	0.25	0.6	272	0.899	0.4	189	0.835
PLRG1	1.64	30	0.26	0.601	273	0.899	0.399	188	0.835
RNASEL	1.64	30	0.26	0.601	274	0.899	0.399	187	0.835
TP53BP1	1.68	30	0.26	0.602	275	0.899	0.398	186	0.835
FAAP20	1.76	30	0.26	0.604	276	0.899	0.396	185	0.835
XRCC6	1.82	30	0.27	0.605	277	0.899	0.395	184	0.835
MPG	1.85	30	0.27	0.606	278	0.899	0.394	183	0.835
RNF17	1.88	30	0.27	0.607	279	0.899	0.393	182	0.835
HES1	1.92	30	0.27	0.608	280	0.899	0.392	181	0.835
PMS2	2	30	0.28	0.61	281	0.899	0.39	180	0.835
XRCC2	2.01	30	0.28	0.61	282	0.899	0.39	179	0.835
MSH3	2.01	30	0.28	0.61	283	0.899	0.39	178	0.835
MSH2	2.09	30	0.28	0.612	284	0.899	0.388	177	0.835
NSMCE4A	2.12	30	0.29	0.612	285	0.899	0.388	176	0.835
TUBGCP2	2.12	30	0.29	0.613	286	0.899	0.387	175	0.835
PLK1	2.16	30	0.29	0.614	287	0.899	0.386	174	0.835
UVSSA	2.18	30	0.29	0.614	288	0.899	0.386	173	0.835
PALB2	2.36	30	0.3	0.618	289	0.899	0.382	172	0.835
RAD52	2.37	30	0.3	0.619	290	0.899	0.381	171	0.835
FMR1NB	2.38	30	0.3	0.619	291	0.899	0.381	170	0.835
EZH2	2.39	30	0.3	0.619	292	0.899	0.381	169	0.835
RECQL	2.44	30	0.31	0.62	293	0.899	0.38	168	0.835
PDILT	2.45	30	0.31	0.621	294	0.899	0.379	167	0.835
DDX20	2.51	30	0.31	0.622	295	0.899	0.378	166	0.835
CDC16	2.52	30	0.31	0.622	296	0.899	0.378	165	0.835
TREX2	2.57	30	0.31	0.623	297	0.899	0.377	164	0.835
ERCC8	2.59	30	0.32	0.624	298	0.899	0.376	163	0.835
INO80	2.69	30	0.32	0.626	299	0.899	0.374	162	0.835
DUT	2.43	24	0.32	0.627	300	0.899	0.373	161	0.835
RECQL5	2.73	30	0.32	0.627	301	0.899	0.373	160	0.835
NUDT18	2.73	30	0.32	0.627	302	0.899	0.373	159	0.835
XAB2	2.83	30	0.33	0.629	303	0.899	0.371	158	0.835
EME1	2.89	30	0.33	0.631	304	0.899	0.369	157	0.835
TCEA1	2.98	30	0.34	0.633	305	0.899	0.367	156	0.835
ALDH1A3	3.11	30	0.35	0.636	306	0.899	0.364	155	0.835
VCP	3.13	30	0.35	0.637	307	0.899	0.363	154	0.835
RAD54L	3.17	30	0.35	0.637	308	0.899	0.363	153	0.835
MORF4L1	3.05	27	0.35	0.638	309	0.899	0.362	152	0.835
TDP2	3.35	30	0.36	0.642	310	0.899	0.358	151	0.835
EEPD1	3.47	30	0.37	0.644	311	0.899	0.356	150	0.835
YWHAG	3.48	30	0.37	0.645	312	0.899	0.355	149	0.835
ALDH5A1	3.53	30	0.37	0.646	313	0.899	0.354	148	0.835
CKAP5	3.57	30	0.38	0.647	314	0.899	0.353	147	0.835
ALDH2	3.68	30	0.38	0.649	315	0.899	0.351	146	0.835
CDK2	3.72	30	0.39	0.65	316	0.899	0.35	145	0.835
NEIL1	3.9	30	0.4	0.654	317	0.899	0.346	144	0.835
POLE	3.92	30	0.4	0.655	318	0.899	0.345	143	0.835
ZSWIM7	4.12	30	0.41	0.659	319	0.899	0.341	142	0.835
BRCA2	4.25	30	0.42	0.662	320	0.899	0.338	141	0.835
HERC2	4.38	30	0.43	0.665	321	0.899	0.335	140	0.835
PER1	4.4	30	0.43	0.666	322	0.899	0.334	139	0.835
RNF4	4.44	30	0.43	0.667	323	0.899	0.333	138	0.835
BPIFB6	4.54	30	0.44	0.669	324	0.899	0.331	137	0.835
RNF212	4.65	30	0.44	0.671	325	0.899	0.329	136	0.835
HELB	4.71	30	0.45	0.673	326	0.899	0.327	135	0.835
PNKP	4.76	30	0.45	0.674	327	0.899	0.326	134	0.835
UBE2B	4.77	30	0.45	0.674	328	0.899	0.326	133	0.835
ASCC3	4.81	30	0.45	0.675	329	0.899	0.325	132	0.835
APEX2	4.84	30	0.46	0.676	330	0.899	0.324	131	0.835
RAD23A	4.85	30	0.46	0.676	331	0.899	0.324	130	0.835
RRM2B	4.92	30	0.46	0.677	332	0.899	0.323	129	0.835
SEM1	3.12	12	0.46	0.678	333	0.899	0.322	128	0.835
CDK6	4.99	30	0.46	0.679	334	0.899	0.321	127	0.835
RAX	5.01	30	0.47	0.679	335	0.899	0.321	126	0.835
NUDT15	5.04	30	0.47	0.68	336	0.899	0.32	125	0.835
POLR1C	5.15	30	0.47	0.683	337	0.899	0.317	124	0.835
ERI3	5.23	30	0.48	0.684	338	0.899	0.316	123	0.835
TOP2B	5.29	30	0.48	0.686	339	0.899	0.314	122	0.835
IDH1	5.29	30	0.48	0.686	340	0.899	0.314	121	0.835
CDH4	5.38	30	0.49	0.688	341	0.899	0.312	120	0.835
RAD51B	5.44	30	0.49	0.689	342	0.899	0.311	119	0.835
RXFP3	5.5	30	0.5	0.69	343	0.899	0.31	118	0.835
MDC1	5.52	30	0.5	0.691	344	0.899	0.309	117	0.835
ERCC3	5.89	30	0.52	0.699	345	0.899	0.301	116	0.835
PHB2	6.08	30	0.53	0.703	346	0.899	0.297	115	0.835
KMT2D	6.11	30	0.53	0.704	347	0.899	0.296	114	0.835
MRE11	6.19	30	0.54	0.705	348	0.899	0.295	113	0.835
EIF6	6.2	30	0.54	0.706	349	0.899	0.294	112	0.835
FAN1	6.2	30	0.54	0.706	350	0.899	0.294	111	0.835
PARP3	6.25	30	0.54	0.707	351	0.899	0.293	110	0.835
ALDH3A2	6.28	30	0.55	0.707	352	0.899	0.293	109	0.835
DDB2	6.34	30	0.55	0.709	353	0.899	0.291	108	0.835
GTF2H4	6.4	30	0.55	0.71	354	0.899	0.29	107	0.835
ALDH1L1	6.52	30	0.56	0.712	355	0.899	0.288	106	0.835
POLK	6.56	30	0.56	0.713	356	0.899	0.287	105	0.835
RAD51	6.57	30	0.56	0.713	357	0.899	0.287	104	0.835
RCC1	6.57	30	0.56	0.714	358	0.899	0.286	103	0.835
C3orf30	6.62	30	0.57	0.715	359	0.899	0.285	102	0.835
GTF2H1	6.66	30	0.57	0.715	360	0.899	0.285	101	0.835
RS1	6.83	30	0.58	0.719	361	0.899	0.281	100	0.835
SMARCAL1	6.99	30	0.59	0.722	362	0.899	0.278	99	0.835
WEE1	7.15	30	0.6	0.726	363	0.899	0.274	98	0.835
MUS81	7.37	30	0.61	0.73	364	0.899	0.27	97	0.835
EXO5	7.37	30	0.61	0.73	365	0.899	0.27	96	0.835
ERCC5	6.18	21	0.61	0.731	366	0.899	0.269	95	0.835
MYC	7.46	30	0.62	0.732	367	0.899	0.268	94	0.835
MSH4	7.47	30	0.62	0.732	368	0.899	0.268	93	0.835
MUTYH	7.51	30	0.62	0.733	369	0.899	0.267	92	0.835
KAT5	7.53	30	0.62	0.733	370	0.899	0.267	91	0.835
DDX11	7.56	30	0.63	0.734	371	0.899	0.266	90	0.835
RNMT	7.68	30	0.63	0.737	372	0.899	0.263	89	0.835
EXD2	7.75	30	0.64	0.738	373	0.899	0.262	88	0.835
POLD2	7.79	30	0.64	0.739	374	0.899	0.261	87	0.835
C7orf49	7.91	30	0.65	0.741	375	0.899	0.259	86	0.835
LAS1L	8.04	30	0.66	0.744	376	0.899	0.256	85	0.835
RD3	8.06	30	0.66	0.744	377	0.899	0.256	84	0.835
POLD4	5.75	15	0.66	0.746	378	0.899	0.254	83	0.835
POLM	8.44	30	0.68	0.752	379	0.899	0.248	82	0.835
OPN5	8.5	30	0.68	0.753	380	0.899	0.247	81	0.835
NFATC2IP	8.51	30	0.68	0.753	381	0.899	0.247	80	0.835
TDG	8.79	30	0.7	0.759	382	0.899	0.241	79	0.835
KCNK10	8.87	30	0.71	0.76	383	0.899	0.24	78	0.835
ECD	8.93	30	0.71	0.761	384	0.899	0.239	77	0.835
PLK3	8.97	30	0.71	0.762	385	0.899	0.238	76	0.835
CUL3	9.02	30	0.72	0.763	386	0.899	0.237	75	0.835
GPR50	9.05	30	0.72	0.764	387	0.899	0.236	74	0.835
NHEJ1	9.16	30	0.73	0.766	388	0.899	0.234	73	0.835
TDP1	9.18	30	0.73	0.766	389	0.899	0.234	72	0.835
GTF2B	9.33	30	0.74	0.769	390	0.899	0.231	71	0.835
ERCC2	9.61	30	0.75	0.774	391	0.899	0.226	70	0.835
KRAS	9.68	30	0.76	0.776	392	0.899	0.224	69	0.835
GSX2	9.74	30	0.76	0.777	393	0.899	0.223	68	0.835
TRIP4	9.75	30	0.76	0.777	394	0.899	0.223	67	0.835
NABP2	9.82	30	0.77	0.778	395	0.899	0.222	66	0.835
SMUG1	9.85	30	0.77	0.779	396	0.899	0.221	65	0.835
DDB1	9.93	30	0.77	0.78	397	0.899	0.22	64	0.835
BABAM1	9.96	30	0.78	0.781	398	0.899	0.219	63	0.835
NEIL2	10.04	30	0.78	0.782	399	0.899	0.218	62	0.835
CDX4	10.27	30	0.79	0.787	400	0.899	0.213	61	0.835
ALKBH2	10.43	30	0.8	0.789	401	0.899	0.211	60	0.835
SPC24	10.48	30	0.81	0.79	402	0.899	0.21	59	0.835
SPEM1	10.55	30	0.81	0.792	403	0.899	0.208	58	0.835
ALDH3A1	10.58	30	0.81	0.792	404	0.899	0.208	57	0.835
XRCC1	10.72	30	0.82	0.795	405	0.899	0.205	56	0.835
CHAF1A	10.9	30	0.83	0.798	406	0.899	0.202	55	0.835
CHEK1	10.92	30	0.84	0.798	407	0.899	0.202	54	0.835
MPLKIP	11.05	30	0.84	0.8	408	0.899	0.2	53	0.835
CDK4	11.23	30	0.85	0.804	409	0.899	0.196	52	0.835
HTR5A	11.23	30	0.85	0.804	410	0.899	0.196	51	0.835
ALDH3B1	11.23	30	0.85	0.804	411	0.899	0.196	50	0.835
PSMG3	11.52	30	0.87	0.809	412	0.901	0.191	49	0.835
TIPIN	11.53	30	0.87	0.809	413	0.901	0.191	48	0.835
EME2	11.87	30	0.89	0.814	414	0.903	0.186	47	0.835
POLD3	11.9	30	0.9	0.815	415	0.903	0.185	46	0.835
PIN1	12.12	30	0.91	0.819	416	0.905	0.181	45	0.835
CCNH	12.32	30	0.92	0.822	417	0.907	0.178	44	0.835
FBXW7	12.45	30	0.93	0.824	418	0.907	0.176	43	0.835
PSMA7	12.68	30	0.95	0.828	419	0.908	0.172	42	0.835
PNPLA5	12.78	30	0.95	0.829	420	0.908	0.171	41	0.835
TREX1	12.98	30	0.96	0.832	421	0.91	0.168	40	0.835
DHX8	13.37	30	0.99	0.838	422	0.912	0.162	39	0.835
SWSAP1	13.53	30	1	0.841	423	0.912	0.159	38	0.835
POLG	13.84	30	1.02	0.846	424	0.912	0.154	37	0.835
RABGGTB	13.87	30	1.02	0.846	425	0.912	0.154	36	0.835
UBE2I	14.08	30	1.03	0.849	426	0.912	0.151	35	0.835
TELO2	14.32	30	1.05	0.852	427	0.912	0.148	34	0.835
TOP2A	14.36	30	1.05	0.853	428	0.912	0.147	33	0.835
RPS5	12.86	24	1.05	0.853	429	0.912	0.147	32	0.835
C8B	14.93	30	1.09	0.861	430	0.912	0.139	31	0.835
TOP3A	15.1	30	1.1	0.863	431	0.912	0.137	30	0.835
ALDH16A1	15.13	30	1.1	0.864	432	0.912	0.136	29	0.835
SLX4	15.3	30	1.11	0.866	433	0.912	0.134	28	0.835
H2AFZ	10.82	15	1.11	0.866	434	0.912	0.134	27	0.835
PRPF19	15.35	30	1.11	0.867	435	0.912	0.133	26	0.835
DDOST	15.38	30	1.11	0.867	436	0.912	0.133	25	0.835
SMARCAD1	15.4	30	1.11	0.867	437	0.912	0.133	24	0.835
FAM96B	15.48	30	1.12	0.869	438	0.912	0.131	23	0.835
KLK12	15.84	30	1.14	0.873	439	0.912	0.127	22	0.835
RNF169	15.97	30	1.15	0.875	440	0.912	0.125	21	0.835
BUD31	15.98	30	1.15	0.875	441	0.912	0.125	20	0.835
SF3B3	16.09	30	1.16	0.876	442	0.912	0.124	19	0.835
FGF4	17.04	30	1.22	0.888	443	0.915	0.112	18	0.835
TP53	17.09	30	1.22	0.889	444	0.915	0.111	17	0.835
XRCC4	13.3	18	1.22	0.89	445	0.915	0.11	16	0.835
PARP1	17.39	30	1.24	0.892	446	0.915	0.108	15	0.835
DSPP	17.65	30	1.26	0.895	447	0.915	0.105	14	0.835
CDC5L	17.75	30	1.26	0.896	448	0.915	0.104	13	0.835
UTS2R	17.75	30	1.26	0.896	449	0.915	0.104	12	0.835
DHX15	17.82	30	1.27	0.897	450	0.915	0.103	11	0.835
SMARCA4	17.86	30	1.27	0.898	451	0.915	0.102	10	0.835
ATRIP	18.46	30	1.31	0.904	452	0.92	0.0958	9	0.835
RPL8	18.91	30	1.33	0.909	453	0.921	0.0911	8	0.835
RAD9A	18.96	30	1.34	0.909	454	0.921	0.0906	7	0.835
AARS	19.4	30	1.36	0.914	455	0.924	0.0863	6	0.835
RBX1	20.99	30	1.46	0.928	456	0.936	0.0717	5	0.835
NOL6	22.27	30	1.54	0.939	457	0.944	0.0614	4	0.835
IMP3	22.46	30	1.55	0.94	458	0.944	0.06	3	0.835
LIG3	23.64	30	1.63	0.948	459	0.949	0.0517	2	0.835
SRSF2	16.79	15	1.64	0.949	460	0.949	0.051	1	0.835

## Sheet: Supplementary File 1b
GENE	sumZ	numObs	normZ	pval_synth	rank_synth	fdr_synth	pval_supp	rank_supp	fdr_supp
RPL14	-28.09	8	-8.95	1.76e-19	1	3.16e-15	1	17929	1
RPS11	-22.1	8	-7.03	1.06e-12	2	9.48e-09	1	17928	1
PSMD2	-19.67	8	-6.24	2.15e-10	3	1.26e-06	1	17927	1
PARP1	-19.47	8	-6.18	3.21e-10	4	1.26e-06	1	17926	1
RPS5	-19.43	8	-6.17	3.5e-10	5	1.26e-06	1	17925	1
NUP205	-19.27	8	-6.11	4.83e-10	6	1.44e-06	1	17924	1
PSMC2	-19.15	8	-6.08	6.19e-10	7	1.44e-06	1	17923	1
POLR1B	-19.13	8	-6.07	6.43e-10	8	1.44e-06	1	17922	1
WDR43	-18.41	8	-5.84	2.62e-09	9	5.22e-06	1	17921	1
RPS16	-17.85	8	-5.66	7.59e-09	10	1.36e-05	1	17920	1
PSMA4	-17.35	8	-5.5	1.92e-08	11	3.14e-05	1	17919	1
NUP93	-17.15	8	-5.43	2.74e-08	12	4.1e-05	1	17918	1
RPL8	-16.91	8	-5.36	4.22e-08	13	5.82e-05	1	17917	1
RPL13A	-11.66	4	-5.22	8.8e-08	14	0.000113	1	17916	1
IMP3	-16.27	8	-5.15	1.3e-07	15	0.000155	1	17915	1
WBSCR22	-16.09	8	-5.09	1.78e-07	16	0.000199	1	17914	1
XPO1	-14.25	7	-4.82	7.26e-07	17	0.000747	1	17913	1
FBL	-15.21	8	-4.81	7.5e-07	18	0.000747	1	17912	1
RAE1	-14.93	8	-4.72	1.17e-06	19	0.00111	1	17911	1
RPL11	-14.84	8	-4.69	1.35e-06	20	0.00121	1	17910	1
CALM2	-7.33	2	-4.63	1.82e-06	21	0.00155	1	17909	1
RPL10A	-12.45	6	-4.54	2.8e-06	22	0.00218	1	17908	1
CDC123	-14.35	8	-4.53	2.9e-06	23	0.00218	1	17907	1
UBA52	-12.42	6	-4.53	2.92e-06	24	0.00218	1	17906	1
NUP98	-14.32	8	-4.52	3.04e-06	25	0.00218	1	17905	1
PSMB4	-14.29	8	-4.51	3.2e-06	26	0.00221	1	17904	1
RPL18	-14.21	8	-4.49	3.61e-06	27	0.0024	1	17903	1
HEATR1	-14.17	8	-4.48	3.8e-06	28	0.00243	1	17902	1
RPL27A	-14.13	8	-4.46	4.02e-06	29	0.00246	1	17901	1
WDR46	-14.1	8	-4.45	4.21e-06	30	0.00246	1	17900	1
EIF2B5	-14.1	8	-4.45	4.25e-06	31	0.00246	1	17899	1
CCT6A	-13.94	8	-4.4	5.39e-06	32	0.00302	1	17898	1
RPL18A	-11.98	6	-4.37	6.33e-06	33	0.00344	1	17897	1
RPS15A	-9.64	4	-4.3	8.42e-06	34	0.00444	1	17896	1
NVL	-13.58	8	-4.29	9.04e-06	35	0.00463	1	17895	1
PSMB7	-13.42	8	-4.23	1.15e-05	36	0.00561	1	17894	1
CCT4	-13.41	8	-4.23	1.16e-05	37	0.00561	1	17893	1
UPF2	-13.33	8	-4.21	1.3e-05	38	0.00613	1	17892	1
LTV1	-13.26	8	-4.18	1.45e-05	39	0.00665	1	17891	1
WDR3	-13.12	8	-4.14	1.74e-05	40	0.0078	1	17890	1
PSMC4	-13.02	8	-4.11	2e-05	41	0.00859	1	17889	1
VARS	-13.02	8	-4.11	2.01e-05	42	0.00859	1	17888	1
CCT3	-13	8	-4.1	2.08e-05	43	0.00867	1	17887	1
UTP15	-12.95	8	-4.08	2.21e-05	44	0.00902	1	17886	1
PSMB2	-12.87	8	-4.06	2.48e-05	45	0.00988	1	17885	1
RPS2	-12.83	8	-4.05	2.6e-05	46	0.0102	1	17884	1
RRN3	-12.82	8	-4.04	2.66e-05	47	0.0102	1	17883	1
EXOSC2	-12.79	8	-4.03	2.76e-05	48	0.0103	1	17882	1
PSMA5	-12.76	8	-4.02	2.9e-05	49	0.0106	1	17881	1
GARS	-12.61	8	-3.97	3.54e-05	50	0.0127	1	17880	1
UCN2	-12.46	8	-3.92	4.35e-05	51	0.0153	1	17879	1
PSMA6	-12.37	8	-3.9	4.88e-05	52	0.0165	1	17878	1
PPOX	-10.71	6	-3.9	4.88e-05	53	0.0165	1	17877	1
RRP7A	-12.36	8	-3.89	4.97e-05	54	0.0165	1	17876	1
UTP20	-12.33	8	-3.89	5.11e-05	55	0.0167	1	17875	1
RPL30	-8.53	4	-3.8	7.28e-05	56	0.0233	1	17874	1
NUP155	-12.04	8	-3.79	7.49e-05	57	0.0236	1	17873	1
CDCA8	-11.99	8	-3.77	8.04e-05	58	0.0248	1	17872	1
PDCD11	-11.87	8	-3.73	9.39e-05	59	0.0285	1	17871	1
RPSA	-11.82	8	-3.72	9.93e-05	60	0.0297	1	17870	1
SMG1	-11.76	8	-3.7	0.000108	61	0.0317	1	17869	1
NOP9	-11.68	8	-3.67	0.00012	62	0.0346	1	17868	1
NOP16	-11.65	8	-3.67	0.000123	63	0.0349	1	17867	1
HSPA9	-11.63	8	-3.66	0.000127	64	0.0355	1	17866	1
ZDHHC18	-11.62	8	-3.65	0.000129	65	0.0355	1	17865	1
GABPB2	-11.6	8	-3.65	0.000131	66	0.0355	1	17864	1
RPLP0	-11.59	8	-3.65	0.000133	67	0.0355	1	17863	1
DCAF13	-11.47	8	-3.61	0.000154	68	0.0406	1	17862	1
RRS1	-11.38	8	-3.58	0.000174	69	0.0451	1	17861	1
SKIV2L2	-11.33	8	-3.56	0.000185	70	0.0472	1	17860	1
AKIRIN1	-11.32	8	-3.56	0.000187	71	0.0472	1	17859	1
PRELID1	-11.21	8	-3.52	0.000213	72	0.053	1	17858	1
LAX1	-11.19	8	-3.52	0.000218	73	0.0537	1	17857	1
THOC2	-11.15	8	-3.5	0.000229	74	0.0548	1	17856	1
EIF6	-11.15	8	-3.5	0.000229	75	0.0548	1	17855	1
PSMC1	-11.14	8	-3.5	0.000232	76	0.0548	1	17854	1
SEC13	-11.13	8	-3.5	0.000236	77	0.0549	1	17853	1
ABT1	-11.1	8	-3.49	0.000243	78	0.0558	1	17852	1
RPL5	-7.82	4	-3.48	0.000254	79	0.0577	1	17851	1
C3orf17	-11.02	8	-3.46	0.000267	80	0.0597	1	17850	1
RXFP4	-10.99	8	-3.45	0.000278	81	0.0616	1	17849	1
MPHOSPH10	-10.94	8	-3.44	0.000294	82	0.0642	1	17848	1
WDR74	-10.89	8	-3.42	0.000312	83	0.0674	1	17847	1
DDX52	-10.86	8	-3.41	0.000322	84	0.0687	1	17846	1
TADA3	-10.81	8	-3.39	0.000344	85	0.0726	1	17845	1
POP7	-10.78	8	-3.38	0.000357	86	0.0744	1	17844	1
LHPP	-10.75	8	-3.38	0.000366	87	0.0754	1	17843	1
POP5	-10.65	8	-3.34	0.000412	88	0.0838	1	17842	1
ARF1	-10.64	8	-3.34	0.000417	89	0.0839	1	17841	1
PSMC6	-10.62	8	-3.33	0.000428	90	0.085	1	17840	1
ESF1	-10.61	8	-3.33	0.000431	91	0.085	1	17839	1
RPL32	-5.28	2	-3.32	0.000457	92	0.0892	1	17838	1
NOC4L	-10.51	8	-3.3	0.000486	93	0.0925	1	17837	1
PHB2	-10.51	8	-3.3	0.000488	94	0.0925	1	17836	1
RPS3	-10.5	8	-3.3	0.000492	95	0.0925	1	17835	1
RPL23	-10.49	8	-3.29	0.000495	96	0.0925	1	17834	1
ATP5A1	-10.48	8	-3.29	0.000504	97	0.0931	0.999	17833	1
C12orf45	-10.43	8	-3.27	0.000532	98	0.0973	0.999	17832	1
RAX2	-10.37	8	-3.25	0.000568	99	0.103	0.999	17831	1
PSMB5	-10.35	8	-3.25	0.00058	100	0.104	0.999	17830	1
GRPEL1	-10.33	8	-3.24	0.000593	101	0.105	0.999	17829	1
TAF12	-10.29	8	-3.23	0.000626	102	0.11	0.999	17828	1
RPS18	-7.24	4	-3.21	0.000663	103	0.115	0.999	17827	1
SMG7	-10.21	8	-3.2	0.000684	104	0.117	0.999	17826	1
BSN	-10.2	8	-3.2	0.000688	105	0.117	0.999	17825	1
EXOSC7	-10.12	8	-3.17	0.000753	106	0.127	0.999	17824	1
GBP1	-10.1	8	-3.17	0.000774	107	0.13	0.999	17823	1
RPS14	-10.07	8	-3.16	0.000796	108	0.132	0.999	17822	1
RPS8	-8.7	6	-3.15	0.000815	109	0.133	0.999	17821	1
FARS2	-10.04	8	-3.15	0.000821	110	0.133	0.999	17820	1
C18orf21	-10.04	8	-3.15	0.000824	111	0.133	0.999	17819	1
RPL15	-4.99	2	-3.13	0.000874	112	0.14	0.999	17818	1
TACC3	-9.97	8	-3.13	0.000886	113	0.141	0.999	17817	1
EIF4E	-9.93	8	-3.11	0.000924	114	0.145	0.999	17816	1
MST1	-9.91	8	-3.1	0.000954	115	0.148	0.999	17815	1
PYCR2	-9.9	8	-3.1	0.000956	116	0.148	0.999	17814	1
DMRTB1	-9.89	8	-3.1	0.000966	117	0.148	0.999	17813	1
FBXW12	-9.88	8	-3.1	0.000978	118	0.149	0.999	17812	1
HAS1	-9.87	8	-3.09	0.000986	119	0.149	0.999	17811	1
RPS19BP1	-9.82	8	-3.08	0.00105	120	0.157	0.999	17810	1
METTL14	-9.81	8	-3.07	0.00106	121	0.157	0.999	17809	1
RAD54L	-9.8	8	-3.07	0.00107	122	0.157	0.999	17808	1
NOP56	-9.75	8	-3.06	0.00112	123	0.161	0.999	17807	1
EIF5B	-9.75	8	-3.05	0.00113	124	0.161	0.999	17806	1
EIF3G	-9.74	8	-3.05	0.00114	125	0.161	0.999	17805	1
VASH2	-9.74	8	-3.05	0.00114	126	0.161	0.999	17804	1
TSR1	-9.74	8	-3.05	0.00114	127	0.161	0.999	17803	1
PIM1	-9.73	8	-3.05	0.00116	128	0.162	0.999	17802	1
PSMA7	-9.69	8	-3.03	0.00121	129	0.168	0.999	17801	1
TAF5	-9.64	8	-3.02	0.00127	130	0.175	0.999	17800	1
UMPS	-9.63	8	-3.02	0.00128	131	0.175	0.999	17799	1
IPO13	-9.61	8	-3.01	0.00131	132	0.178	0.999	17798	1
RPL7	-8.32	6	-3.01	0.00132	133	0.178	0.999	17797	1
HIST1H2AA	-9.59	8	-3	0.00134	134	0.179	0.999	17796	1
DDX47	-9.57	8	-3	0.00137	135	0.181	0.999	17795	1
STAG1	-9.56	8	-2.99	0.00139	136	0.181	0.999	17794	1
PSMB1	-9.55	8	-2.99	0.00139	137	0.181	0.999	17793	1
HYAL3	-9.55	8	-2.99	0.0014	138	0.181	0.999	17792	1
PATE2	-9.46	8	-2.96	0.00153	139	0.197	0.998	17791	1
EXOSC4	-9.45	8	-2.96	0.00156	140	0.199	0.998	17790	1
POLR1A	-9.43	8	-2.95	0.00158	141	0.201	0.998	17789	1
RPL27	-6.62	4	-2.93	0.0017	142	0.214	0.998	17788	1
OGT	-9.35	8	-2.93	0.00171	143	0.214	0.998	17787	1
NOB1	-9.34	8	-2.92	0.00173	144	0.214	0.998	17786	1
DKC1	-9.34	8	-2.92	0.00173	145	0.214	0.998	17785	1
MED10	-9.29	8	-2.91	0.00183	146	0.224	0.998	17784	1
KCTD1	-9.26	8	-2.9	0.00188	147	0.23	0.998	17783	1
ATP5B	-9.23	8	-2.89	0.00194	148	0.235	0.998	17782	1
NCF2	-9.16	8	-2.86	0.00209	149	0.251	0.998	17781	1
RPS13	-9.09	8	-2.84	0.00224	150	0.266	0.998	17780	1
CSNK2A3	-7.87	6	-2.84	0.00224	151	0.266	0.998	17779	1
RPP40	-9.05	8	-2.83	0.00233	152	0.273	0.998	17778	1
TRPC7	-9.05	8	-2.83	0.00233	153	0.273	0.998	17777	1
PSMD11	-9.04	8	-2.83	0.00235	154	0.274	0.998	17776	1
SARS	-9	8	-2.81	0.00244	155	0.282	0.998	17775	1
CHMP6	-7.78	6	-2.81	0.00248	156	0.285	0.998	17774	1
SKA3	-8.97	8	-2.8	0.00252	157	0.287	0.997	17773	1
TNKS2	-8.97	8	-2.8	0.00253	158	0.287	0.997	17772	1
SAC3D1	-8.96	8	-2.8	0.00256	159	0.289	0.997	17771	1
GNL3L	-8.93	8	-2.79	0.00263	160	0.294	0.997	17770	1
POLR2C	-8.92	8	-2.79	0.00266	161	0.296	0.997	17769	1
KCNH1	-8.89	8	-2.78	0.00274	162	0.302	0.997	17768	1
NOL6	-8.88	8	-2.78	0.00275	163	0.302	0.997	17767	1
UBL4B	-8.88	8	-2.77	0.00277	164	0.302	0.997	17766	1
SAP18	-8.87	8	-2.77	0.00278	165	0.302	0.997	17765	1
GRSF1	-8.29	7	-2.77	0.0028	166	0.302	0.997	17764	1
AMIGO1	-8.83	8	-2.76	0.00291	167	0.312	0.997	17763	1
BRF1	-8.8	8	-2.75	0.00299	168	0.319	0.997	17762	1
CREB1	-8.79	8	-2.74	0.00303	169	0.321	0.997	17761	1
ARPC4	-8.76	8	-2.74	0.0031	170	0.327	0.997	17760	1
TRA2A	-8.75	8	-2.73	0.00314	171	0.328	0.997	17759	1
COL20A1	-8.75	8	-2.73	0.00315	172	0.328	0.997	17758	1
GATA4	-8.73	8	-2.73	0.00321	173	0.333	0.997	17757	1
TMEM246	-8.69	8	-2.71	0.00332	174	0.342	0.997	17756	1
POPDC3	-8.69	8	-2.71	0.00334	175	0.342	0.997	17755	1
FARSA	-8.67	8	-2.71	0.00338	176	0.343	0.997	17754	1
RPS19	-7.51	6	-2.71	0.00338	177	0.343	0.997	17753	1
UQCRC1	-8.66	8	-2.7	0.00343	178	0.344	0.997	17752	1
MFSD3	-8.66	8	-2.7	0.00343	179	0.344	0.997	17751	1
BYSL	-8.64	8	-2.7	0.00349	180	0.347	0.997	17750	1
CD6	-8.63	8	-2.69	0.00353	181	0.35	0.996	17749	1
ANKLE2	-8.62	8	-2.69	0.00355	182	0.35	0.996	17748	1
PPP1R15B	-8.61	8	-2.69	0.00358	183	0.351	0.996	17747	1
RPL36	-8.56	8	-2.67	0.00377	184	0.367	0.996	17746	1
TAB1	-8.55	8	-2.67	0.00381	185	0.367	0.996	17745	1
ZNF76	-8.55	8	-2.67	0.00381	186	0.367	0.996	17744	1
NIPAL1	-7.99	7	-2.66	0.00385	187	0.369	0.996	17743	1
KIAA1875	-8.52	8	-2.66	0.00391	188	0.371	0.996	17742	1
CCT2	-8.51	8	-2.65	0.00397	189	0.371	0.996	17741	1
ISG20L2	-8.51	8	-2.65	0.00397	190	0.371	0.996	17740	1
PSMB3	-8.5	8	-2.65	0.00399	191	0.371	0.996	17739	1
MIXL1	-8.5	8	-2.65	0.004	192	0.371	0.996	17738	1
WDR75	-8.5	8	-2.65	0.00401	193	0.371	0.996	17737	1
KPNB1	-8.49	8	-2.65	0.00403	194	0.371	0.996	17736	1
THAP1	-8.49	8	-2.65	0.00404	195	0.371	0.996	17735	1
BTG1	-8.48	8	-2.65	0.00406	196	0.371	0.996	17734	1
PES1	-8.44	8	-2.63	0.00421	197	0.383	0.996	17733	1
LYN	-8.4	8	-2.62	0.00437	198	0.394	0.996	17732	1
CRLF1	-8.4	8	-2.62	0.00437	199	0.394	0.996	17731	1
FLVCR1	-8.38	8	-2.62	0.00446	200	0.4	0.996	17730	1
SCNN1D	-8.36	8	-2.61	0.00455	201	0.404	0.995	17729	1
DONSON	-8.36	8	-2.61	0.00455	202	0.404	0.995	17728	1
MRI1	-8.35	8	-2.6	0.0046	203	0.406	0.995	17727	1
SMU1	-8.33	8	-2.6	0.0047	204	0.413	0.995	17726	1
TRIM33	-8.32	8	-2.6	0.00472	205	0.413	0.995	17725	1
NRAS	-8.32	8	-2.59	0.00474	206	0.413	0.995	17724	1
MYL2	-8.3	8	-2.59	0.00482	207	0.417	0.995	17723	1
ZBTB8OS	-8.28	8	-2.58	0.00492	208	0.424	0.995	17722	1
KLHDC8A	-8.26	8	-2.58	0.00501	209	0.43	0.995	17721	1
EIF4A3	-8.25	8	-2.57	0.00505	210	0.431	0.995	17720	1
BNIPL	-7.7	7	-2.57	0.00513	211	0.435	0.995	17719	1
NOP58	-7.13	6	-2.57	0.00515	212	0.435	0.995	17718	1
HEATR3	-8.22	8	-2.56	0.00517	213	0.436	0.995	17717	1
NGDN	-8.21	8	-2.56	0.00523	214	0.437	0.995	17716	1
FURIN	-8.21	8	-2.56	0.00524	215	0.437	0.995	17715	1
RRP9	-8.2	8	-2.56	0.00529	216	0.439	0.995	17714	1
RNFT2	-8.19	8	-2.55	0.00533	217	0.44	0.995	17713	1
AK2	-8.18	8	-2.55	0.00538	218	0.442	0.995	17712	1
EIF2B2	-8.17	8	-2.55	0.00545	219	0.446	0.995	17711	1
HSPA5	-8.16	8	-2.54	0.0055	220	0.448	0.994	17710	1
C19orf48	-8.15	8	-2.54	0.00553	221	0.448	0.994	17709	1
RPL31	-5.75	4	-2.54	0.0056	222	0.451	0.994	17708	1
DHRS4	-8.14	8	-2.54	0.00561	223	0.451	0.994	17707	1
ESRRG	-8.13	8	-2.53	0.00564	224	0.451	0.994	17706	1
ARHGEF12	-8.12	8	-2.53	0.00569	225	0.452	0.994	17705	1
TRAIP	-8.12	8	-2.53	0.0057	226	0.452	0.994	17704	1
FAU	-8.1	8	-2.53	0.00578	227	0.456	0.994	17703	1
DDX10	-8.1	8	-2.52	0.00583	228	0.458	0.994	17702	1
AURKA	-8.08	8	-2.52	0.00592	229	0.463	0.994	17701	1
CORT	-5.71	4	-2.51	0.00595	230	0.464	0.994	17700	1
MAN2C1	-8.06	8	-2.51	0.00604	231	0.469	0.994	17699	1
FUBP1	-8.05	8	-2.51	0.00609	232	0.47	0.994	17698	1
CECR6	-8.04	8	-2.5	0.00612	233	0.471	0.994	17697	1
HPDL	-8.03	8	-2.5	0.00618	234	0.473	0.994	17696	1
KIAA1429	-8.03	8	-2.5	0.0062	235	0.473	0.994	17695	1
CCDC60	-8	8	-2.49	0.00636	236	0.482	0.994	17694	1
NOL10	-8	8	-2.49	0.00638	237	0.482	0.994	17693	1
NFIA	-7.97	8	-2.48	0.00655	238	0.493	0.993	17692	1
UTP3	-7.95	8	-2.48	0.00662	239	0.494	0.993	17691	1
PTH1R	-7.95	8	-2.48	0.00666	240	0.494	0.993	17690	1
PSMA2	-7.95	8	-2.47	0.00667	241	0.494	0.993	17689	1
TADA2B	-7.94	8	-2.47	0.00669	242	0.494	0.993	17688	1
CCT5	-7.94	8	-2.47	0.00669	243	0.494	0.993	17687	1
CD74	-7.9	8	-2.46	0.00697	244	0.512	0.993	17686	1
CDK1	-7.87	8	-2.45	0.00713	245	0.522	0.993	17685	1
POLR2B	-7.85	8	-2.44	0.00725	246	0.528	0.993	17684	1
EMD	-7.85	8	-2.44	0.00729	247	0.528	0.993	17683	1
ARID3B	-7.84	8	-2.44	0.00735	248	0.528	0.993	17682	1
E2F4	-7.83	8	-2.44	0.00738	249	0.528	0.993	17681	1
EIF5	-7.83	8	-2.44	0.00739	250	0.528	0.993	17680	1
B3GAT2	-7.83	8	-2.44	0.0074	251	0.528	0.993	17679	1
DHX37	-7.83	8	-2.44	0.00742	252	0.528	0.993	17678	1
RHOF	-7.82	8	-2.43	0.00746	253	0.529	0.993	17677	1
RPS23	-7.81	8	-2.43	0.00754	254	0.533	0.992	17676	1
RNMT	-7.79	8	-2.43	0.00765	255	0.538	0.992	17675	1
SRSF3	-7.79	8	-2.42	0.00769	256	0.539	0.992	17674	1
RRP36	-7.76	8	-2.41	0.00787	257	0.546	0.992	17673	1
ZFP69	-7.76	8	-2.41	0.00788	258	0.546	0.992	17672	1
CCT8	-7.76	8	-2.41	0.00789	259	0.546	0.992	17671	1
USP37	-7.74	8	-2.41	0.00803	260	0.551	0.992	17670	1
KRT4	-7.74	8	-2.41	0.00805	261	0.551	0.992	17669	1
CCDC64	-7.73	8	-2.41	0.00806	262	0.551	0.992	17668	1
CAMSAP3	-7.73	8	-2.4	0.00811	263	0.553	0.992	17667	1
CDK18	-7.72	8	-2.4	0.00819	264	0.556	0.992	17666	1
RNF181	-7.7	8	-2.4	0.00829	265	0.561	0.992	17665	1
WDR90	-7.7	8	-2.39	0.00833	266	0.561	0.992	17664	1
NCSTN	-7.69	8	-2.39	0.00838	267	0.561	0.992	17663	1
NETO2	-7.69	8	-2.39	0.00839	268	0.561	0.992	17662	1
RBM14	-7.64	8	-2.38	0.00877	269	0.584	0.991	17661	1
PNMA3	-7.62	8	-2.37	0.00891	270	0.592	0.991	17660	1
GNS	-7.61	8	-2.37	0.00898	271	0.592	0.991	17659	1
POLR2M	-7.61	8	-2.37	0.00898	272	0.592	0.991	17658	1
PDZK1IP1	-7.61	8	-2.36	0.00902	273	0.592	0.991	17657	1
ZBTB7B	-7.59	8	-2.36	0.0091	274	0.596	0.991	17656	1
RINL	-7.58	8	-2.36	0.00921	275	0.599	0.991	17655	1
SUSD4	-7.58	8	-2.36	0.00922	276	0.599	0.991	17654	1
LAMA4	-7.58	8	-2.36	0.00925	277	0.599	0.991	17653	1
GPX2	-7.57	8	-2.35	0.0093	278	0.6	0.991	17652	1
NDFIP1	-7.55	8	-2.35	0.00948	279	0.609	0.991	17651	1
PDE4DIP	-7.54	8	-2.34	0.00952	280	0.609	0.99	17650	1
C1QL3	-7.54	8	-2.34	0.00956	281	0.61	0.99	17649	1
ICOSLG	-7.53	8	-2.34	0.00959	282	0.61	0.99	17648	1
POLR2L	-7.5	8	-2.33	0.00989	283	0.626	0.99	17647	1
DNAH10	-7.49	8	-2.33	0.00993	284	0.626	0.99	17646	1
BTAF1	-7.49	8	-2.33	0.00994	285	0.626	0.99	17645	1
TRMT112	-7.49	8	-2.33	0.01	286	0.626	0.99	17644	1
UTP23	-7.48	8	-2.33	0.01	287	0.626	0.99	17643	1
RPL9	-3.73	2	-2.32	0.0102	288	0.633	0.99	17642	1
UCKL1	-7.46	8	-2.32	0.0102	289	0.633	0.99	17641	1
RPS9	-7.46	8	-2.32	0.0102	290	0.633	0.99	17640	1
HOXC8	-7.42	8	-2.3	0.0106	291	0.651	0.989	17639	1
SMIM1	-7.41	8	-2.3	0.0107	292	0.651	0.989	17638	1
CA14	-7.41	8	-2.3	0.0107	293	0.651	0.989	17637	1
GTPBP4	-7.4	8	-2.3	0.0107	294	0.651	0.989	17636	1
C19orf60	-7.39	8	-2.3	0.0108	295	0.651	0.989	17635	1
CIB4	-7.39	8	-2.3	0.0108	296	0.651	0.989	17634	1
PNKD	-7.39	8	-2.3	0.0108	297	0.651	0.989	17633	1
RNASE4	-7.39	8	-2.3	0.0109	298	0.651	0.989	17632	1
UTP11L	-7.39	8	-2.3	0.0109	299	0.651	0.989	17631	1
KIF13B	-7.37	8	-2.29	0.0111	300	0.661	0.989	17630	1
PRPF38B	-7.36	8	-2.28	0.0112	301	0.664	0.989	17629	1
PROM2	-7.35	8	-2.28	0.0112	302	0.664	0.989	17628	1
RPL37A	-5.2	4	-2.28	0.0112	303	0.664	0.989	17627	1
VWA3A	-7.33	8	-2.28	0.0114	304	0.671	0.989	17626	1
FCF1	-5.18	4	-2.28	0.0114	305	0.671	0.989	17625	1
ZNF704	-7.32	8	-2.27	0.0115	306	0.675	0.988	17624	1
BZRAP1	-7.31	8	-2.27	0.0116	307	0.675	0.988	17623	1
NMD3	-7.28	8	-2.26	0.0119	308	0.693	0.988	17622	1
NOL11	-7.27	8	-2.26	0.012	309	0.695	0.988	17621	1
ADCK3	-7.26	8	-2.25	0.0121	310	0.695	0.988	17620	1
OR5M11	-7.26	8	-2.25	0.0121	311	0.695	0.988	17619	1
MOBP	-7.26	8	-2.25	0.0121	312	0.695	0.988	17618	1
OR2B3	-7.25	8	-2.25	0.0122	313	0.699	0.988	17617	1
RPL12	-7.24	8	-2.25	0.0123	314	0.704	0.988	17616	1
SBNO1	-7.21	8	-2.24	0.0126	315	0.713	0.987	17615	1
COPA	-7.21	8	-2.24	0.0126	316	0.713	0.987	17614	1
C6orf62	-7.21	8	-2.24	0.0126	317	0.713	0.987	17613	1
TSC22D2	-7.21	8	-2.24	0.0126	318	0.713	0.987	17612	1
GTF2A2	-7.2	8	-2.24	0.0127	319	0.713	0.987	17611	1
PAX9	-7.2	8	-2.23	0.0128	320	0.713	0.987	17610	1
GLCE	-6.23	6	-2.23	0.0128	321	0.713	0.987	17609	1
RPL19	-7.18	8	-2.23	0.0129	322	0.72	0.987	17608	1
ROMO1	-7.16	8	-2.22	0.0131	323	0.728	0.987	17607	1
BPIFB3	-7.16	8	-2.22	0.0132	324	0.729	0.987	17606	1
TTC4	-7.15	8	-2.22	0.0132	325	0.73	0.987	17605	1
LRIG3	-7.14	8	-2.22	0.0133	326	0.733	0.987	17604	1
LOR	-7.13	8	-2.21	0.0135	327	0.738	0.987	17603	1
NOP14	-7.13	8	-2.21	0.0135	328	0.738	0.987	17602	1
TSEN2	-7.12	8	-2.21	0.0136	329	0.74	0.986	17601	1
FDXACB1	-7.12	8	-2.21	0.0136	330	0.741	0.986	17600	1
MRPS12	-7.11	8	-2.21	0.0137	331	0.741	0.986	17599	1
MTPN	-7.1	8	-2.2	0.0138	332	0.741	0.986	17598	1
TTLL10	-7.1	8	-2.2	0.0138	333	0.741	0.986	17597	1
PSMC5	-7.1	8	-2.2	0.0138	334	0.741	0.986	17596	1
SELRC1	-7.1	8	-2.2	0.0139	335	0.741	0.986	17595	1
DSP	-7.09	8	-2.2	0.0139	336	0.741	0.986	17594	1
SPEN	-7.09	8	-2.2	0.014	337	0.741	0.986	17593	1
DDX54	-7.08	8	-2.2	0.0141	338	0.741	0.986	17592	1
PPP2R2A	-7.07	8	-2.19	0.0141	339	0.741	0.986	17591	1
RPP14	-7.07	8	-2.19	0.0141	340	0.741	0.986	17590	1
FBLN2	-7.07	8	-2.19	0.0141	341	0.741	0.986	17589	1
TMEM5	-7.07	8	-2.19	0.0141	342	0.741	0.986	17588	1
FASTKD2	-7.06	8	-2.19	0.0143	343	0.747	0.986	17587	1
CGN	-7.05	8	-2.19	0.0144	344	0.747	0.986	17586	1
SLC35G1	-7.05	8	-2.19	0.0144	345	0.747	0.986	17585	1
SPATA5L1	-7.04	8	-2.18	0.0145	346	0.748	0.986	17584	1
PSMD7	-7.04	8	-2.18	0.0145	347	0.748	0.986	17583	1
HIST1H1B	-7.04	8	-2.18	0.0146	348	0.749	0.985	17582	1
SAFB	-7.03	8	-2.18	0.0146	349	0.749	0.985	17581	1
ALDOA	-7.03	8	-2.18	0.0146	350	0.749	0.985	17580	1
FLG2	-7.03	8	-2.18	0.0147	351	0.749	0.985	17579	1
NUDT3	-7.02	8	-2.18	0.0147	352	0.75	0.985	17578	1
DHRS4L2	-6.07	6	-2.17	0.0148	353	0.754	0.985	17577	1
RIMBP2	-7	8	-2.17	0.0149	354	0.756	0.985	17576	1
ARVCF	-7	8	-2.17	0.015	355	0.756	0.985	17575	1
KCNJ12	-7	8	-2.17	0.015	356	0.756	0.985	17574	1
SHOC2	-6.99	8	-2.17	0.0151	357	0.761	0.985	17573	1
TTLL3	-6.98	8	-2.16	0.0152	358	0.762	0.985	17572	1
IRAK2	-6.98	8	-2.16	0.0153	359	0.762	0.985	17571	1
GNB3	-6.98	8	-2.16	0.0153	360	0.762	0.985	17570	1
MYO10	-6.96	8	-2.16	0.0155	361	0.771	0.984	17569	1
FTO	-6.95	8	-2.15	0.0156	362	0.772	0.984	17568	1
MTHFS	-6.95	8	-2.15	0.0156	363	0.772	0.984	17567	1
CCDC7	-6.94	8	-2.15	0.0157	364	0.772	0.984	17566	1
S1PR3	-6.01	6	-2.15	0.0157	365	0.772	0.984	17565	1
RAB7A	-6.92	8	-2.15	0.016	366	0.781	0.984	17564	1
SPATA13	-6.92	8	-2.14	0.016	367	0.782	0.984	17563	1
MRPL38	-5.99	6	-2.14	0.0161	368	0.782	0.984	17562	1
DDX21	-6.9	8	-2.14	0.0162	369	0.785	0.984	17561	1
OR6J1	-6.9	8	-2.14	0.0163	370	0.785	0.984	17560	1
PRRT2	-6.9	8	-2.14	0.0163	371	0.785	0.984	17559	1
RIMKLA	-6.89	8	-2.14	0.0163	372	0.785	0.984	17558	1
CHMP4B	-6.89	8	-2.14	0.0164	373	0.785	0.984	17557	1
LAS1L	-6.89	8	-2.13	0.0164	374	0.785	0.984	17556	1
ALG2	-6.89	8	-2.13	0.0164	375	0.785	0.984	17555	1
RPE65	-6.88	8	-2.13	0.0165	376	0.785	0.984	17554	1
FOXA2	-6.88	8	-2.13	0.0166	377	0.787	0.983	17553	1
RASEF	-6.86	8	-2.12	0.0168	378	0.797	0.983	17552	1
GPN1	-6.85	8	-2.12	0.0169	379	0.799	0.983	17551	1
STAB1	-6.85	8	-2.12	0.017	380	0.799	0.983	17550	1
PWP2	-6.85	8	-2.12	0.017	381	0.799	0.983	17549	1
GNAI3	-6.84	8	-2.12	0.017	382	0.799	0.983	17548	1
TBL3	-6.83	8	-2.12	0.0172	383	0.804	0.983	17547	1
BAIAP3	-6.82	8	-2.11	0.0174	384	0.805	0.983	17546	1
C1orf198	-6.81	8	-2.11	0.0174	385	0.805	0.983	17545	1
ACTL6B	-6.81	8	-2.11	0.0174	386	0.805	0.983	17544	1
GBF1	-6.81	8	-2.11	0.0174	387	0.805	0.983	17543	1
BBC3	-6.81	8	-2.11	0.0174	388	0.805	0.983	17542	1
DNMT1	-6.81	8	-2.11	0.0175	389	0.805	0.983	17541	1
TEX13B	-6.8	8	-2.11	0.0176	390	0.807	0.982	17540	1
CASC3	-6.8	8	-2.11	0.0176	391	0.807	0.982	17539	1
PPTC7	-6.79	8	-2.1	0.0177	392	0.807	0.982	17538	1
MTNR1B	-6.79	8	-2.1	0.0177	393	0.807	0.982	17537	1
LIN28A	-6.79	8	-2.1	0.0178	394	0.808	0.982	17536	1
RBMX	-3.39	2	-2.1	0.0179	395	0.812	0.982	17535	1
GFRA3	-6.77	8	-2.1	0.018	396	0.812	0.982	17534	1
CHMP2B	-6.77	8	-2.1	0.018	397	0.812	0.982	17533	1
KREMEN1	-6.77	8	-2.1	0.018	398	0.812	0.982	17532	1
LRPPRC	-6.76	8	-2.09	0.0182	399	0.816	0.982	17531	1
IL2RB	-6.75	8	-2.09	0.0183	400	0.817	0.982	17530	1
WTAP	-6.75	8	-2.09	0.0183	401	0.817	0.982	17529	1
AADACL3	-6.75	8	-2.09	0.0183	402	0.817	0.982	17528	1
TSPAN1	-6.74	8	-2.09	0.0185	403	0.82	0.982	17527	1
DIS3	-6.74	8	-2.09	0.0185	404	0.82	0.982	17526	1
IFITM3	-6.73	8	-2.08	0.0186	405	0.82	0.981	17525	1
TAF13	-6.72	8	-2.08	0.0187	406	0.82	0.981	17524	1
ACADS	-6.72	8	-2.08	0.0187	407	0.82	0.981	17523	1
LIN9	-6.72	8	-2.08	0.0188	408	0.82	0.981	17522	1
ATP5C1	-6.72	8	-2.08	0.0188	409	0.82	0.981	17521	1
LYPD4	-6.72	8	-2.08	0.0188	410	0.82	0.981	17520	1
ZBTB9	-6.71	8	-2.08	0.0188	411	0.82	0.981	17519	1
LINGO3	-6.71	8	-2.08	0.0189	412	0.82	0.981	17518	1
SMG6	-6.71	8	-2.08	0.0189	413	0.82	0.981	17517	1
KIAA0895L	-6.7	8	-2.08	0.019	414	0.82	0.981	17516	1
RRM1	-6.7	8	-2.08	0.019	415	0.82	0.981	17515	1
KMT2D	-6.7	8	-2.07	0.0191	416	0.822	0.981	17514	1
IP6K1	-6.69	8	-2.07	0.0191	417	0.823	0.981	17513	1
ASPM	-6.69	8	-2.07	0.0192	418	0.826	0.981	17512	1
TIMM17A	-6.68	8	-2.07	0.0193	419	0.826	0.981	17511	1
C3AR1	-6.68	8	-2.07	0.0194	420	0.827	0.981	17510	1
KIF26A	-6.68	8	-2.07	0.0194	421	0.827	0.981	17509	1
TSACC	-5.78	6	-2.06	0.0195	422	0.827	0.98	17508	1
RBM15B	-6.67	8	-2.06	0.0195	423	0.827	0.98	17507	1
CCT7	-6.66	8	-2.06	0.0196	424	0.827	0.98	17506	1
ITIH3	-6.66	8	-2.06	0.0196	425	0.827	0.98	17505	1
NUP160	-6.66	8	-2.06	0.0197	426	0.827	0.98	17504	1
RPS3A	-4.71	4	-2.06	0.0197	427	0.827	0.98	17503	1
DPEP1	-6.65	8	-2.06	0.0198	428	0.828	0.98	17502	1
SERPINA3	-6.64	8	-2.05	0.02	429	0.836	0.98	17501	1
GALK1	-6.63	8	-2.05	0.0202	430	0.839	0.98	17500	1
HTR3D	-6.63	8	-2.05	0.0202	431	0.839	0.98	17499	1
RAB43	-6.61	8	-2.05	0.0204	432	0.845	0.98	17498	1
NXT1	-6.61	8	-2.04	0.0205	433	0.846	0.98	17497	1
MAML2	-6.6	8	-2.04	0.0205	434	0.846	0.979	17496	1
LRRK2	-6.6	8	-2.04	0.0206	435	0.846	0.979	17495	1
CASKIN2	-6.59	8	-2.04	0.0207	436	0.846	0.979	17494	1
NAT16	-6.59	8	-2.04	0.0207	437	0.846	0.979	17493	1
EXOC6B	-6.59	8	-2.04	0.0207	438	0.846	0.979	17492	1
C4orf3	-6.59	8	-2.04	0.0207	439	0.846	0.979	17491	1
INHBB	-6.59	8	-2.04	0.0208	440	0.846	0.979	17490	1
AIFM1	-6.59	8	-2.04	0.0208	441	0.846	0.979	17489	1
PRMT7	-6.58	8	-2.04	0.0209	442	0.846	0.979	17488	1
KIAA1143	-6.58	8	-2.04	0.0209	443	0.846	0.979	17487	1
PREP	-6.58	8	-2.03	0.021	444	0.846	0.979	17486	1
MSL2	-6.57	8	-2.03	0.021	445	0.847	0.979	17485	1
TNNI1	-6.57	8	-2.03	0.0211	446	0.849	0.979	17484	1
VIPAS39	-6.56	8	-2.03	0.0212	447	0.85	0.979	17483	1
SUPV3L1	-6.56	8	-2.03	0.0213	448	0.85	0.979	17482	1
TMEM63A	-6.55	8	-2.02	0.0214	449	0.852	0.979	17481	1
PDE4A	-6.55	8	-2.02	0.0215	450	0.852	0.979	17480	1
DIRAS3	-6.54	8	-2.02	0.0215	451	0.852	0.979	17479	1
MEF2A	-6.54	8	-2.02	0.0215	452	0.852	0.979	17478	1
PABPN1L	-6.54	8	-2.02	0.0216	453	0.854	0.978	17477	1
CBY1	-6.53	8	-2.02	0.0217	454	0.855	0.978	17476	1
BRINP2	-6.53	8	-2.02	0.0217	455	0.855	0.978	17475	1
AP3S1	-6.53	8	-2.02	0.0217	456	0.855	0.978	17474	1
NUS1	-6.52	8	-2.02	0.0218	457	0.856	0.978	17473	1
CLDN3	-6.52	8	-2.02	0.0219	458	0.856	0.978	17472	1
C12orf76	-6.52	8	-2.01	0.022	459	0.856	0.978	17471	1
FAM107A	-6.51	8	-2.01	0.022	460	0.856	0.978	17470	1
EIF3A	-6.51	8	-2.01	0.022	461	0.856	0.978	17469	1
UNCX	-6.51	8	-2.01	0.0221	462	0.858	0.978	17468	1
ADSS	-6.5	8	-2.01	0.0222	463	0.858	0.978	17467	1
OR6C76	-6.5	8	-2.01	0.0223	464	0.858	0.978	17466	1
PAK1IP1	-6.5	8	-2.01	0.0223	465	0.858	0.978	17465	1
KIF21B	-6.48	8	-2	0.0226	466	0.858	0.977	17464	1
ZYG11A	-6.48	8	-2	0.0226	467	0.858	0.977	17463	1
BSND	-6.48	8	-2	0.0226	468	0.858	0.977	17462	1
PCNXL4	-6.48	8	-2	0.0226	469	0.858	0.977	17461	1
MYLIP	-6.48	8	-2	0.0226	470	0.858	0.977	17460	1
NSFL1C	-6.47	8	-2	0.0227	471	0.858	0.977	17459	1
C11orf30	-6.47	8	-2	0.0227	472	0.858	0.977	17458	1
OLA1	-6.47	8	-2	0.0227	473	0.858	0.977	17457	1
PSMA1	-6.47	8	-2	0.0228	474	0.858	0.977	17456	1
BRAP	-6.46	8	-2	0.0229	475	0.858	0.977	17455	1
AGT	-6.46	8	-2	0.023	476	0.858	0.977	17454	1
IFT57	-6.45	8	-1.99	0.023	477	0.858	0.977	17453	1
WDR77	-6.45	8	-1.99	0.0231	478	0.858	0.977	17452	1
PNPT1	-6.45	8	-1.99	0.0231	479	0.858	0.977	17451	1
IMP4	-6.45	8	-1.99	0.0231	480	0.858	0.977	17450	1
CCDC9	-6.45	8	-1.99	0.0232	481	0.858	0.977	17449	1
TSHB	-6.45	8	-1.99	0.0232	482	0.858	0.977	17448	1
SNX27	-6.45	8	-1.99	0.0232	483	0.858	0.977	17447	1
DHFR	-5.58	6	-1.99	0.0232	484	0.858	0.977	17446	1
BCLAF1	-6.44	8	-1.99	0.0232	485	0.858	0.977	17445	1
C10orf67	-6.44	8	-1.99	0.0233	486	0.86	0.977	17444	1
RAB25	-6.43	8	-1.99	0.0234	487	0.863	0.977	17443	1
SCAMP4	-6.42	8	-1.98	0.0236	488	0.866	0.976	17442	1
RNF13	-6.42	8	-1.98	0.0237	489	0.866	0.976	17441	1
RACGAP1	-6.42	8	-1.98	0.0237	490	0.866	0.976	17440	1
NDFIP2	-6.41	8	-1.98	0.0238	491	0.866	0.976	17439	1
CAD	-6.41	8	-1.98	0.0239	492	0.866	0.976	17438	1
LRRC8E	-6.41	8	-1.98	0.0239	493	0.866	0.976	17437	1
MRTO4	-6.41	8	-1.98	0.0239	494	0.866	0.976	17436	1
B3GALNT2	-6.4	8	-1.98	0.024	495	0.868	0.976	17435	1
C20orf85	-6.4	8	-1.98	0.0241	496	0.868	0.976	17434	1
CRCT1	-6.39	8	-1.97	0.0242	497	0.868	0.976	17433	1
CHPF2	-6.39	8	-1.97	0.0242	498	0.868	0.976	17432	1
FUT11	-6.39	8	-1.97	0.0243	499	0.868	0.976	17431	1
NCOA2	-6.38	8	-1.97	0.0243	500	0.868	0.976	17430	1
NCKAP5L	-6.38	8	-1.97	0.0244	501	0.868	0.976	17429	1
SMC4	-6.38	8	-1.97	0.0244	502	0.868	0.976	17428	1
ELP6	-6.38	8	-1.97	0.0244	503	0.868	0.976	17427	1
DLST	-6.38	8	-1.97	0.0244	504	0.868	0.976	17426	1
APOA2	-6.38	8	-1.97	0.0244	505	0.868	0.976	17425	1
TBCD	-6.37	8	-1.97	0.0246	506	0.87	0.975	17424	1
SNRNP27	-6.37	8	-1.97	0.0246	507	0.871	0.975	17423	1
PPDPF	-6.36	8	-1.96	0.0247	508	0.872	0.975	17422	1
ZNF839	-6.35	8	-1.96	0.0248	509	0.874	0.975	17421	1
CD48	-6.35	8	-1.96	0.0249	510	0.875	0.975	17420	1
TMEM143	-6.35	8	-1.96	0.025	511	0.875	0.975	17419	1
ATL2	-6.35	8	-1.96	0.025	512	0.875	0.975	17418	1
ANKRD42	-6.34	8	-1.96	0.0251	513	0.875	0.975	17417	1
SMKR1	-6.34	8	-1.96	0.0251	514	0.875	0.975	17416	1
EXOSC8	-6.34	8	-1.96	0.0252	515	0.877	0.975	17415	1
CMTM1	-6.32	8	-1.95	0.0255	516	0.881	0.975	17414	1
RCAN2	-6.32	8	-1.95	0.0255	517	0.881	0.975	17413	1
OR51B4	-6.32	8	-1.95	0.0255	518	0.881	0.975	17412	1
TCHHL1	-6.31	8	-1.95	0.0256	519	0.881	0.974	17411	1
TBC1D30	-6.31	8	-1.95	0.0256	520	0.881	0.974	17410	1
ZNF287	-6.31	8	-1.95	0.0256	521	0.881	0.974	17409	1
C15orf37	-6.31	8	-1.95	0.0257	522	0.881	0.974	17408	1
OLFML3	-6.31	8	-1.95	0.0257	523	0.882	0.974	17407	1
TAF1L	-6.3	8	-1.94	0.0259	524	0.884	0.974	17406	1
CDCA5	-6.3	8	-1.94	0.0259	525	0.884	0.974	17405	1
DGKA	-6.3	8	-1.94	0.0259	526	0.884	0.974	17404	1
OR1J1	-6.29	8	-1.94	0.026	527	0.884	0.974	17403	1
ACACB	-6.29	8	-1.94	0.0261	528	0.887	0.974	17402	1
ZIC2	-6.29	8	-1.94	0.0262	529	0.887	0.974	17401	1
ATAD3A	-5.43	6	-1.94	0.0264	530	0.891	0.974	17400	1
CNOT10	-6.27	8	-1.94	0.0265	531	0.891	0.974	17399	1
MAN1A2	-6.27	8	-1.94	0.0265	532	0.891	0.974	17398	1
MAP4K2	-6.27	8	-1.93	0.0265	533	0.891	0.973	17397	1
FAM174B	-6.27	8	-1.93	0.0265	534	0.891	0.973	17396	1
IQSEC1	-6.26	8	-1.93	0.0266	535	0.891	0.973	17395	1
RAB6B	-6.26	8	-1.93	0.0267	536	0.892	0.973	17394	1
KDM1A	-6.25	8	-1.93	0.0268	537	0.894	0.973	17393	1
MCM3AP	-6.25	8	-1.93	0.0269	538	0.894	0.973	17392	1
RPL38	-6.25	8	-1.93	0.0269	539	0.894	0.973	17391	1
COL16A1	-5.41	6	-1.93	0.0269	540	0.894	0.973	17390	1
PER2	-6.23	8	-1.92	0.0272	541	0.896	0.973	17389	1
FCRLA	-6.23	8	-1.92	0.0272	542	0.896	0.973	17388	1
TRIM31	-6.23	8	-1.92	0.0273	543	0.896	0.973	17387	1
RFX6	-6.23	8	-1.92	0.0273	544	0.896	0.973	17386	1
EMC1	-6.23	8	-1.92	0.0273	545	0.896	0.973	17385	1
PCMTD1	-6.22	8	-1.92	0.0274	546	0.896	0.973	17384	1
ARX	-6.22	8	-1.92	0.0274	547	0.896	0.973	17383	1
SLC39A8	-6.22	8	-1.92	0.0274	548	0.896	0.973	17382	1
DEPDC1	-6.22	8	-1.92	0.0275	549	0.896	0.973	17381	1
TMBIM6	-6.22	8	-1.92	0.0275	550	0.896	0.973	17380	1
SRP68	-6.21	8	-1.92	0.0276	551	0.896	0.972	17379	1
NUP88	-6.21	8	-1.92	0.0276	552	0.896	0.972	17378	1
NUTF2	-6.21	8	-1.92	0.0277	553	0.898	0.972	17377	1
SORT1	-6.2	8	-1.91	0.0278	554	0.9	0.972	17376	1
HRCT1	-6.2	8	-1.91	0.0279	555	0.903	0.972	17375	1
CSE1L	-6.19	8	-1.91	0.0281	556	0.904	0.972	17374	1
SERPINE2	-6.19	8	-1.91	0.0281	557	0.904	0.972	17373	1
FAM83H	-6.18	8	-1.91	0.0282	558	0.904	0.972	17372	1
LEF1	-6.18	8	-1.91	0.0282	559	0.904	0.972	17371	1
EXTL3	-6.17	8	-1.9	0.0285	560	0.91	0.971	17370	1
RPL13	-4.36	4	-1.9	0.0286	561	0.91	0.971	17369	1
CSTF3	-6.17	8	-1.9	0.0286	562	0.91	0.971	17368	1
NCAPG	-6.16	8	-1.9	0.0287	563	0.91	0.971	17367	1
CSDE1	-6.16	8	-1.9	0.0287	564	0.91	0.971	17366	1
SMOC1	-6.16	8	-1.9	0.0287	565	0.91	0.971	17365	1
WDR26	-5.33	6	-1.9	0.0287	566	0.91	0.971	17364	1
PRM1	-6.15	8	-1.9	0.0288	567	0.912	0.971	17363	1
CENPA	-6.15	8	-1.9	0.029	568	0.914	0.971	17362	1
TENC1	-6.15	8	-1.9	0.029	569	0.914	0.971	17361	1
SCN8A	-6.14	8	-1.89	0.0291	570	0.916	0.971	17360	1
NRIP3	-6.13	8	-1.89	0.0293	571	0.916	0.971	17359	1
FAM69A	-6.13	8	-1.89	0.0293	572	0.916	0.971	17358	1
NAA25	-6.13	8	-1.89	0.0293	573	0.916	0.971	17357	1
TTF2	-6.13	8	-1.89	0.0293	574	0.916	0.971	17356	1
TAF3	-6.11	8	-1.88	0.0297	575	0.923	0.97	17355	1
BHLHE41	-6.11	8	-1.88	0.0298	576	0.923	0.97	17354	1
ATP2B2	-6.11	8	-1.88	0.0299	577	0.923	0.97	17353	1
PRPF40B	-6.11	8	-1.88	0.0299	578	0.923	0.97	17352	1
ZNF35	-6.1	8	-1.88	0.0299	579	0.923	0.97	17351	1
ANLN	-5.71	7	-1.88	0.0299	580	0.923	0.97	17350	1
C2orf50	-6.1	8	-1.88	0.0299	581	0.923	0.97	17349	1
CCL28	-5.28	6	-1.88	0.03	582	0.926	0.97	17348	1
TEAD1	-6.09	8	-1.88	0.0301	583	0.926	0.97	17347	1
KIF23	-6.09	8	-1.88	0.0303	584	0.926	0.97	17346	1
LIPM	-6.09	8	-1.88	0.0303	585	0.926	0.97	17345	1
ZNF682	-6.08	8	-1.88	0.0303	586	0.926	0.97	17344	1
LHX8	-6.08	8	-1.88	0.0304	587	0.926	0.97	17343	1
UBE2Q1	-6.08	8	-1.88	0.0304	588	0.926	0.97	17342	1
CHML	-6.08	8	-1.87	0.0304	589	0.926	0.97	17341	1
VTA1	-6.08	8	-1.87	0.0305	590	0.927	0.969	17340	1
NDUFB2	-6.07	8	-1.87	0.0305	591	0.927	0.969	17339	1
TM4SF18	-6.07	8	-1.87	0.0307	592	0.93	0.969	17338	1
NCOA6	-6.07	8	-1.87	0.0308	593	0.93	0.969	17337	1
GVQW1	-6.06	8	-1.87	0.031	594	0.934	0.969	17336	1
SGIP1	-6.05	8	-1.87	0.031	595	0.934	0.969	17335	1
OR2A12	-6.04	8	-1.86	0.0313	596	0.94	0.969	17334	1
GCC1	-6.04	8	-1.86	0.0313	597	0.941	0.969	17333	1
TWISTNB	-6.04	8	-1.86	0.0314	598	0.942	0.969	17332	1
ALX3	-6.03	8	-1.86	0.0316	599	0.945	0.968	17331	1
RPL10	-5.22	6	-1.86	0.0317	600	0.947	0.968	17330	1
CEPT1	-6.02	8	-1.86	0.0318	601	0.948	0.968	17329	1
LXN	-6.02	8	-1.85	0.0319	602	0.948	0.968	17328	1
RAPGEFL1	-6.01	8	-1.85	0.0319	603	0.948	0.968	17327	1
ISCA1	-3.01	2	-1.85	0.032	604	0.948	0.968	17326	1
PITPNM2	-6.01	8	-1.85	0.032	605	0.948	0.968	17325	1
CEP63	-6.01	8	-1.85	0.032	606	0.948	0.968	17324	1
MTBP	-6.01	8	-1.85	0.0321	607	0.948	0.968	17323	1
OSGEP	-6	8	-1.85	0.0322	608	0.95	0.968	17322	1
ANKRD1	-6	8	-1.85	0.0323	609	0.952	0.968	17321	1
ARID3A	-5.99	8	-1.85	0.0325	610	0.955	0.967	17320	1
RAB4A	-5.98	8	-1.84	0.0326	611	0.956	0.967	17319	1
PPAPDC1B	-5.98	8	-1.84	0.0327	612	0.956	0.967	17318	1
THAP11	-5.98	8	-1.84	0.0327	613	0.956	0.967	17317	1
GNL2	-5.97	8	-1.84	0.0328	614	0.956	0.967	17316	1
SLMO1	-5.97	8	-1.84	0.033	615	0.956	0.967	17315	1
C6orf226	-5.96	8	-1.84	0.0331	616	0.956	0.967	17314	1
SCARF1	-5.96	8	-1.84	0.0331	617	0.956	0.967	17313	1
PEAK1	-5.96	8	-1.83	0.0333	618	0.956	0.967	17312	1
TSR2	-5.96	8	-1.83	0.0333	619	0.956	0.967	17311	1
TNFSF9	-5.95	8	-1.83	0.0334	620	0.956	0.967	17310	1
CDC42BPB	-5.95	8	-1.83	0.0335	621	0.956	0.967	17309	1
CD80	-5.95	8	-1.83	0.0335	622	0.956	0.967	17308	1
DHRS2	-5.95	8	-1.83	0.0335	623	0.956	0.967	17307	1
GLE1	-5.95	8	-1.83	0.0335	624	0.956	0.966	17306	1
LYPD2	-5.94	8	-1.83	0.0335	625	0.956	0.966	17305	1
ZMAT3	-5.94	8	-1.83	0.0337	626	0.956	0.966	17304	1
SCRIB	-5.93	8	-1.83	0.0338	627	0.956	0.966	17303	1
ACTG1	-5.93	8	-1.83	0.0338	628	0.956	0.966	17302	1
SP7	-5.93	8	-1.83	0.0338	629	0.956	0.966	17301	1
PIEZO2	-5.93	8	-1.83	0.0338	630	0.956	0.966	17300	1
TMEM14E	-5.93	8	-1.83	0.0339	631	0.956	0.966	17299	1
BUB1B	-5.93	8	-1.83	0.0339	632	0.956	0.966	17298	1
TADA1	-5.93	8	-1.83	0.034	633	0.956	0.966	17297	1
CATSPER1	-5.93	8	-1.83	0.034	634	0.956	0.966	17296	1
PPP1R10	-5.92	8	-1.82	0.034	635	0.956	0.966	17295	1
BAD	-5.92	8	-1.82	0.0341	636	0.956	0.966	17294	1
C19orf70	-5.92	8	-1.82	0.0341	637	0.956	0.966	17293	1
IGF1R	-5.92	8	-1.82	0.0341	638	0.956	0.966	17292	1
UNC50	-5.92	8	-1.82	0.0342	639	0.956	0.966	17291	1
MICU1	-5.92	8	-1.82	0.0342	640	0.956	0.966	17290	1
MTRF1L	-5.92	8	-1.82	0.0342	641	0.956	0.966	17289	1
FAIM2	-5.91	8	-1.82	0.0343	642	0.956	0.966	17288	1
FANCE	-5.91	8	-1.82	0.0344	643	0.956	0.966	17287	1
URB2	-5.91	8	-1.82	0.0344	644	0.956	0.966	17286	1
CUTA	-5.91	8	-1.82	0.0344	645	0.956	0.966	17285	1
CCDC58	-2.95	2	-1.82	0.0345	646	0.956	0.966	17284	1
SPPL3	-5.9	8	-1.82	0.0346	647	0.959	0.965	17283	1
DDX59	-5.11	6	-1.82	0.0347	648	0.959	0.965	17282	1
ABCD3	-5.89	8	-1.81	0.0348	649	0.96	0.965	17281	1
HNF4A	-5.89	8	-1.81	0.0348	650	0.96	0.965	17280	1
DDO	-5.89	8	-1.81	0.0349	651	0.96	0.965	17279	1
MFSD10	-5.89	8	-1.81	0.035	652	0.96	0.965	17278	1
IRF6	-5.89	8	-1.81	0.035	653	0.96	0.965	17277	1
DBX1	-5.88	8	-1.81	0.035	654	0.96	0.965	17276	1
NCMAP	-5.88	8	-1.81	0.0352	655	0.963	0.965	17275	1
COL5A1	-5.88	8	-1.81	0.0352	656	0.963	0.965	17274	1
ZNF551	-5.86	8	-1.8	0.0355	657	0.966	0.964	17273	1
RAB32	-5.86	8	-1.8	0.0356	658	0.966	0.964	17272	1
RPLP2	-5.07	6	-1.8	0.0357	659	0.966	0.964	17271	1
N4BP3	-5.86	8	-1.8	0.0357	660	0.966	0.964	17270	1
IL18R1	-5.85	8	-1.8	0.0358	661	0.966	0.964	17269	1
SDAD1	-5.85	8	-1.8	0.0359	662	0.966	0.964	17268	1
MCOLN3	-5.85	8	-1.8	0.0359	663	0.966	0.964	17267	1
C21orf33	-5.85	8	-1.8	0.0359	664	0.966	0.964	17266	1
DNAH12	-5.85	8	-1.8	0.0359	665	0.966	0.964	17265	1
C9orf57	-5.85	8	-1.8	0.0359	666	0.966	0.964	17264	1
AACS	-5.85	8	-1.8	0.0359	667	0.966	0.964	17263	1
PVRL4	-5.84	8	-1.8	0.0361	668	0.967	0.964	17262	1
DHX30	-5.84	8	-1.8	0.0361	669	0.967	0.964	17261	1
BRI3BP	-5.84	8	-1.8	0.0361	670	0.967	0.964	17260	1
NDUFS1	-5.84	8	-1.8	0.0362	671	0.967	0.964	17259	1
NR2F1	-5.83	8	-1.79	0.0363	672	0.967	0.964	17258	1
SLC25A18	-5.83	8	-1.79	0.0364	673	0.967	0.964	17257	1
MPV17L2	-5.83	8	-1.79	0.0364	674	0.967	0.964	17256	1
CPSF4	-5.83	8	-1.79	0.0364	675	0.967	0.964	17255	1
DPY19L2	-5.82	8	-1.79	0.0365	676	0.968	0.963	17254	1
YY1AP1	-5.82	8	-1.79	0.0366	677	0.968	0.963	17253	1
TNFAIP8L1	-5.82	8	-1.79	0.0367	678	0.971	0.963	17252	1
FANCD2	-5.82	8	-1.79	0.0368	679	0.971	0.963	17251	1
VEGFB	-5.81	8	-1.79	0.037	680	0.975	0.963	17250	1
TLL2	-5.8	8	-1.79	0.0371	681	0.976	0.963	17249	1
OR3A2	-5.8	8	-1.79	0.0371	682	0.976	0.963	17248	1
EIF4EBP1	-5.8	8	-1.78	0.0372	683	0.976	0.963	17247	1
LBR	-5.8	8	-1.78	0.0373	684	0.977	0.963	17246	1
CCDC172	-5.79	8	-1.78	0.0373	685	0.977	0.963	17245	1
NUP62	-5.79	8	-1.78	0.0374	686	0.977	0.963	17244	1
C16orf86	-5.79	8	-1.78	0.0375	687	0.98	0.962	17243	1
SHCBP1L	-5.78	8	-1.78	0.0377	688	0.98	0.962	17242	1
IL31	-5.78	8	-1.78	0.0377	689	0.98	0.962	17241	1
FAM196B	-5.78	8	-1.78	0.0378	690	0.98	0.962	17240	1
NUP214	-5.78	8	-1.78	0.0378	691	0.98	0.962	17239	1
PLEKHG5	-5.77	8	-1.77	0.038	692	0.981	0.962	17238	1
SLC16A7	-5.77	8	-1.77	0.038	693	0.981	0.962	17237	1
TRIM66	-5.76	8	-1.77	0.0381	694	0.981	0.962	17236	1
ROR1	-5.76	8	-1.77	0.0381	695	0.981	0.962	17235	1
CCR5	-5.76	8	-1.77	0.0382	696	0.981	0.962	17234	1
PPAPDC2	-5.76	8	-1.77	0.0382	697	0.981	0.962	17233	1
BAK1	-5.75	8	-1.77	0.0385	698	0.981	0.962	17232	1
POMGNT2	-5.75	8	-1.77	0.0385	699	0.981	0.962	17231	1
NRG1	-5.75	8	-1.77	0.0386	700	0.981	0.961	17230	1
RCC1	-5.74	8	-1.77	0.0387	701	0.981	0.961	17229	1
CLASP2	-5.74	8	-1.77	0.0387	702	0.981	0.961	17228	1
ONECUT2	-5.74	8	-1.77	0.0387	703	0.981	0.961	17227	1
ACOX3	-5.74	8	-1.77	0.0388	704	0.981	0.961	17226	1
SMNDC1	-5.74	8	-1.76	0.0388	705	0.981	0.961	17225	1
ZP4	-5.74	8	-1.76	0.0388	706	0.981	0.961	17224	1
OR4S1	-5.73	8	-1.76	0.039	707	0.981	0.961	17223	1
YES1	-5.73	8	-1.76	0.0391	708	0.981	0.961	17222	1
LGALS3	-5.73	8	-1.76	0.0391	709	0.981	0.961	17221	1
STAT2	-5.73	8	-1.76	0.0391	710	0.981	0.961	17220	1
ACTR2	-5.73	8	-1.76	0.0391	711	0.981	0.961	17219	1
EBNA1BP2	-5.72	8	-1.76	0.0393	712	0.981	0.961	17218	1
DDX51	-5.72	8	-1.76	0.0394	713	0.981	0.961	17217	1
POU4F2	-5.72	8	-1.76	0.0394	714	0.981	0.961	17216	1
TFDP3	-5.71	8	-1.75	0.0397	715	0.981	0.96	17215	1
EFHB	-5.7	8	-1.75	0.0397	716	0.981	0.96	17214	1
RHOA	-5.7	8	-1.75	0.0398	717	0.981	0.96	17213	1
RNF41	-5.7	8	-1.75	0.0398	718	0.981	0.96	17212	1
GLO1	-5.7	8	-1.75	0.0398	719	0.981	0.96	17211	1
SIKE1	-5.7	8	-1.75	0.0399	720	0.981	0.96	17210	1
RCL1	-5.7	8	-1.75	0.0399	721	0.981	0.96	17209	1
AP3M2	-5.7	8	-1.75	0.0399	722	0.981	0.96	17208	1
WNT7A	-5.7	8	-1.75	0.04	723	0.981	0.96	17207	1
PPP2R3A	-5.7	8	-1.75	0.04	724	0.981	0.96	17206	1
FHL1	-5.69	8	-1.75	0.0401	725	0.981	0.96	17205	1
LPAR2	-5.69	8	-1.75	0.0401	726	0.981	0.96	17204	1
C8orf74	-5.69	8	-1.75	0.0401	727	0.981	0.96	17203	1
YEATS4	-5.69	8	-1.75	0.0401	728	0.981	0.96	17202	1
CACYBP	-5.69	8	-1.75	0.0401	729	0.981	0.96	17201	1
PGF	-5.69	8	-1.75	0.0402	730	0.981	0.96	17200	1
GPR88	-5.69	8	-1.75	0.0402	731	0.981	0.96	17199	1
RRP1	-5.69	8	-1.75	0.0403	732	0.981	0.96	17198	1
CXCR6	-5.68	8	-1.75	0.0403	733	0.981	0.96	17197	1
C14orf142	-4.92	6	-1.75	0.0403	734	0.981	0.96	17196	1
NUDT21	-5.68	8	-1.75	0.0404	735	0.981	0.96	17195	1
TMEM50A	-5.68	8	-1.75	0.0405	736	0.981	0.96	17194	1
KCNQ2	-5.68	8	-1.75	0.0405	737	0.981	0.96	17193	1
EIF3B	-5.68	8	-1.75	0.0405	738	0.981	0.96	17192	1
ITPRIPL2	-5.68	8	-1.74	0.0405	739	0.981	0.959	17191	1
PRKAA2	-5.67	8	-1.74	0.0406	740	0.981	0.959	17190	1
ADH1A	-5.67	8	-1.74	0.0407	741	0.981	0.959	17189	1
UBLCP1	-5.67	8	-1.74	0.0408	742	0.981	0.959	17188	1
MAP3K7	-5.66	8	-1.74	0.0408	743	0.981	0.959	17187	1
ARHGAP30	-5.66	8	-1.74	0.0409	744	0.981	0.959	17186	1
EPPK1	-5.66	8	-1.74	0.0409	745	0.981	0.959	17185	1
BSDC1	-5.66	8	-1.74	0.041	746	0.981	0.959	17184	1
ASB18	-5.66	8	-1.74	0.0411	747	0.981	0.959	17183	1
RABGAP1L	-5.66	8	-1.74	0.0411	748	0.981	0.959	17182	1
DDX24	-5.65	8	-1.74	0.0411	749	0.981	0.959	17181	1
IKZF2	-5.65	8	-1.74	0.0412	750	0.981	0.959	17180	1
MRPL34	-5.65	8	-1.74	0.0412	751	0.981	0.959	17179	1
PSMG3	-5.65	8	-1.74	0.0412	752	0.981	0.959	17178	1
SRSF1	-5.65	8	-1.74	0.0413	753	0.981	0.959	17177	1
CYC1	-5.65	8	-1.73	0.0414	754	0.981	0.959	17176	1
FAM96B	-5.64	8	-1.73	0.0414	755	0.981	0.959	17175	1
KRT18	-4.89	6	-1.73	0.0415	756	0.981	0.959	17174	1
MTA1	-5.64	8	-1.73	0.0415	757	0.981	0.959	17173	1
POMP	-5.64	8	-1.73	0.0415	758	0.981	0.959	17172	1
FBRSL1	-5.64	8	-1.73	0.0416	759	0.983	0.958	17171	1
CDC7	-5.63	8	-1.73	0.0417	760	0.983	0.958	17170	1
VPS26B	-5.63	8	-1.73	0.0418	761	0.983	0.958	17169	1
C20orf194	-5.63	8	-1.73	0.0418	762	0.983	0.958	17168	1
CRYGC	-5.63	8	-1.73	0.0419	763	0.983	0.958	17167	1
GNAI2	-5.63	8	-1.73	0.0419	764	0.983	0.958	17166	1
MAPK14	-5.62	8	-1.73	0.0421	765	0.983	0.958	17165	1
AATF	-5.62	8	-1.73	0.0422	766	0.983	0.958	17164	1
PRCP	-5.61	8	-1.72	0.0423	767	0.983	0.958	17163	1
TCTA	-5.61	8	-1.72	0.0423	768	0.983	0.958	17162	1
SLC2A9	-5.61	8	-1.72	0.0424	769	0.983	0.958	17161	1
UBIAD1	-5.61	8	-1.72	0.0424	770	0.983	0.958	17160	1
CPNE4	-5.6	8	-1.72	0.0426	771	0.983	0.957	17159	1
WNT3A	-5.6	8	-1.72	0.0426	772	0.983	0.957	17158	1
DNASE1L3	-5.6	8	-1.72	0.0427	773	0.983	0.957	17157	1
INO80B	-5.6	8	-1.72	0.0428	774	0.983	0.957	17156	1
C1orf56	-5.59	8	-1.72	0.0429	775	0.983	0.957	17155	1
SCLY	-5.59	8	-1.72	0.043	776	0.983	0.957	17154	1
C20orf195	-5.59	8	-1.72	0.043	777	0.983	0.957	17153	1
ANAPC5	-5.59	8	-1.72	0.043	778	0.983	0.957	17152	1
C7orf13	-5.58	8	-1.71	0.0432	779	0.983	0.957	17151	1
COX14	-5.58	8	-1.71	0.0432	780	0.983	0.957	17150	1
KCNA10	-5.58	8	-1.71	0.0433	781	0.983	0.957	17149	1
NLRP10	-5.58	8	-1.71	0.0434	782	0.983	0.957	17148	1
NHP2	-5.58	8	-1.71	0.0434	783	0.983	0.957	17147	1
POLR1C	-5.57	8	-1.71	0.0434	784	0.983	0.957	17146	1
LRIF1	-5.57	8	-1.71	0.0435	785	0.983	0.957	17145	1
POLR1D	-5.57	8	-1.71	0.0435	786	0.983	0.956	17144	1
PPP1R12B	-5.57	8	-1.71	0.0435	787	0.983	0.956	17143	1
ATF7IP2	-5.57	8	-1.71	0.0436	788	0.983	0.956	17142	1
OPHN1	-5.57	8	-1.71	0.0436	789	0.983	0.956	17141	1
UROS	-4.82	6	-1.71	0.0436	790	0.983	0.956	17140	1
MAPKAPK3	-5.56	8	-1.71	0.0439	791	0.983	0.956	17139	1
SESN2	-5.55	8	-1.71	0.0441	792	0.983	0.956	17138	1
BOLL	-5.55	8	-1.7	0.0441	793	0.983	0.956	17137	1
DNM3	-5.55	8	-1.7	0.0442	794	0.983	0.956	17136	1
UTP6	-5.54	8	-1.7	0.0443	795	0.983	0.956	17135	1
GFOD2	-5.54	8	-1.7	0.0444	796	0.983	0.956	17134	1
LAMA1	-5.54	8	-1.7	0.0444	797	0.983	0.956	17133	1
CRTAC1	-5.54	8	-1.7	0.0445	798	0.983	0.956	17132	1
CD81	-5.53	8	-1.7	0.0447	799	0.983	0.955	17131	1
HUS1B	-5.53	8	-1.7	0.0449	800	0.983	0.955	17130	1
ERMARD	-5.53	8	-1.7	0.0449	801	0.983	0.955	17129	1
PLA2G2F	-5.52	8	-1.7	0.045	802	0.983	0.955	17128	1
ARMCX1	-5.52	8	-1.7	0.045	803	0.983	0.955	17127	1
PELI3	-5.52	8	-1.7	0.045	804	0.983	0.955	17126	1
SLC35E2B	-5.52	8	-1.69	0.0451	805	0.983	0.955	17125	1
WDR65	-5.51	8	-1.69	0.0453	806	0.983	0.955	17124	1
TAF10	-5.51	8	-1.69	0.0453	807	0.983	0.955	17123	1
GPR108	-5.51	8	-1.69	0.0453	808	0.983	0.955	17122	1
MLLT4	-5.51	8	-1.69	0.0454	809	0.983	0.955	17121	1
STK4	-5.51	8	-1.69	0.0455	810	0.983	0.955	17120	1
PPT1	-5.5	8	-1.69	0.0456	811	0.983	0.954	17119	1
FAM115C	-5.5	8	-1.69	0.0456	812	0.983	0.954	17118	1
BCL2L12	-5.5	8	-1.69	0.0457	813	0.983	0.954	17117	1
SPTSSB	-5.49	8	-1.69	0.0459	814	0.983	0.954	17116	0.999
HSD11B2	-5.49	8	-1.69	0.0459	815	0.983	0.954	17115	0.999
ZNF862	-5.49	8	-1.68	0.046	816	0.983	0.954	17114	0.999
ADRA2A	-5.49	8	-1.68	0.0461	817	0.983	0.954	17113	0.999
HIST1H3B	-3.88	4	-1.68	0.0461	818	0.983	0.954	17112	0.999
IRF9	-5.48	8	-1.68	0.0462	819	0.983	0.954	17111	0.999
PXN	-4.75	6	-1.68	0.0462	820	0.983	0.954	17110	0.999
APOC3	-5.48	8	-1.68	0.0462	821	0.983	0.954	17109	0.999
FBXO43	-5.48	8	-1.68	0.0462	822	0.983	0.954	17108	0.999
PAGE5	-5.48	8	-1.68	0.0462	823	0.983	0.954	17107	0.999
GPD2	-5.48	8	-1.68	0.0462	824	0.983	0.954	17106	0.999
ALX1	-5.48	8	-1.68	0.0463	825	0.983	0.954	17105	0.999
LCK	-5.48	8	-1.68	0.0463	826	0.983	0.954	17104	0.999
RPUSD1	-5.48	8	-1.68	0.0463	827	0.983	0.954	17103	0.999
CCNC	-5.47	8	-1.68	0.0465	828	0.983	0.953	17102	0.999
DENND2D	-5.47	8	-1.68	0.0465	829	0.983	0.953	17101	0.999
PHGR1	-5.47	8	-1.68	0.0465	830	0.983	0.953	17100	0.999
MRPS18C	-5.47	8	-1.68	0.0466	831	0.983	0.953	17099	0.999
GAS2L3	-5.47	8	-1.68	0.0466	832	0.983	0.953	17098	0.999
OR7G3	-5.47	8	-1.68	0.0466	833	0.983	0.953	17097	0.999
CCR9	-5.47	8	-1.68	0.0467	834	0.983	0.953	17096	0.999
CNTN3	-5.47	8	-1.68	0.0468	835	0.983	0.953	17095	0.999
PEA15	-5.46	8	-1.68	0.0468	836	0.983	0.953	17094	0.999
ZNF823	-5.46	8	-1.68	0.0468	837	0.983	0.953	17093	0.999
FABP1	-5.46	8	-1.68	0.0469	838	0.983	0.953	17092	0.999
THEM5	-5.45	8	-1.67	0.0474	839	0.983	0.953	17091	0.999
CSK	-5.44	8	-1.67	0.0474	840	0.983	0.953	17090	0.999
FLJ27365	-5.44	8	-1.67	0.0475	841	0.983	0.953	17089	0.999
ZXDC	-5.44	8	-1.67	0.0475	842	0.983	0.952	17088	0.999
LAMA3	-5.44	8	-1.67	0.0477	843	0.983	0.952	17087	0.999
CPSF7	-5.44	8	-1.67	0.0477	844	0.983	0.952	17086	0.999
MAGEA12	-5.43	8	-1.67	0.0478	845	0.983	0.952	17085	0.999
RMND5A	-5.43	8	-1.67	0.0479	846	0.983	0.952	17084	0.999
KIAA0895	-5.43	8	-1.67	0.0479	847	0.983	0.952	17083	0.999
TP53BP2	-5.43	8	-1.67	0.0479	848	0.983	0.952	17082	0.999
RIOK2	-5.43	8	-1.66	0.048	849	0.983	0.952	17081	0.999
DOHH	-5.43	8	-1.66	0.048	850	0.983	0.952	17080	0.999
RRAGC	-5.43	8	-1.66	0.048	851	0.983	0.952	17079	0.999
CAMK1G	-5.43	8	-1.66	0.0481	852	0.983	0.952	17078	0.999
POLR2E	-5.42	8	-1.66	0.0482	853	0.983	0.952	17077	0.999
F11R	-5.42	8	-1.66	0.0482	854	0.983	0.952	17076	0.999
SCN10A	-5.41	8	-1.66	0.0484	855	0.983	0.952	17075	0.999
VPS37B	-5.41	8	-1.66	0.0484	856	0.983	0.952	17074	0.999
PRSS27	-5.41	8	-1.66	0.0486	857	0.983	0.951	17073	0.999
HAT1	-5.41	8	-1.66	0.0486	858	0.983	0.951	17072	0.999
GPR152	-5.41	8	-1.66	0.0487	859	0.983	0.951	17071	0.999
PIFO	-5.4	8	-1.66	0.0489	860	0.983	0.951	17070	0.999
EPRS	-5.4	8	-1.66	0.0489	861	0.983	0.951	17069	0.999
NDUFA5	-5.4	8	-1.65	0.049	862	0.983	0.951	17068	0.999
UTP14A	-5.39	8	-1.65	0.0491	863	0.983	0.951	17067	0.999
CTGF	-5.39	8	-1.65	0.0492	864	0.983	0.951	17066	0.999
NEK8	-5.39	8	-1.65	0.0492	865	0.983	0.951	17065	0.999
MESP1	-5.39	8	-1.65	0.0493	866	0.983	0.951	17064	0.999
DHH	-5.38	8	-1.65	0.0494	867	0.983	0.951	17063	0.999
CACNG3	-5.38	8	-1.65	0.0494	868	0.983	0.951	17062	0.999
CAPN6	-5.38	8	-1.65	0.0494	869	0.983	0.951	17061	0.999
KIF18A	-5.38	8	-1.65	0.0495	870	0.983	0.951	17060	0.999
EGFL7	-5.38	8	-1.65	0.0495	871	0.983	0.951	17059	0.999
ZBTB17	-5.38	8	-1.65	0.0496	872	0.983	0.95	17058	0.999
BCL7A	-5.38	8	-1.65	0.0496	873	0.983	0.95	17057	0.999
EIF2S1	-5.38	8	-1.65	0.0497	874	0.983	0.95	17056	0.999
STX8	-5.37	8	-1.65	0.0498	875	0.983	0.95	17055	0.999
PDLIM2	-5.37	8	-1.65	0.0498	876	0.983	0.95	17054	0.999
POLR2F	-5.37	8	-1.65	0.0498	877	0.983	0.95	17053	0.999
SYT14	-5.37	8	-1.65	0.0499	878	0.983	0.95	17052	0.999
TSSK6	-5.37	8	-1.65	0.0499	879	0.983	0.95	17051	0.999
IBA57	-5.37	8	-1.65	0.0499	880	0.983	0.95	17050	0.999
CCDC27	-5.37	8	-1.64	0.05	881	0.983	0.95	17049	0.999
S100A1	-5.36	8	-1.64	0.05	882	0.983	0.95	17048	0.999
ADAM22	-5.36	8	-1.64	0.0501	883	0.983	0.95	17047	0.999
PSMD13	-5.36	8	-1.64	0.0502	884	0.983	0.95	17046	0.999
NFE2	-5.36	8	-1.64	0.0502	885	0.983	0.95	17045	0.999
YPEL5	-5.36	8	-1.64	0.0503	886	0.983	0.95	17044	0.999
KCNK9	-5.35	8	-1.64	0.0504	887	0.983	0.95	17043	0.999
TSKU	-5.35	8	-1.64	0.0504	888	0.983	0.95	17042	0.999
WSCD2	-5.35	8	-1.64	0.0505	889	0.983	0.95	17041	0.999
ASB15	-5.35	8	-1.64	0.0505	890	0.983	0.95	17040	0.999
CLEC16A	-5.35	8	-1.64	0.0506	891	0.983	0.949	17039	0.999
ISCA2	-5.35	8	-1.64	0.0506	892	0.983	0.949	17038	0.999
UQCRC2	-5.34	8	-1.64	0.0508	893	0.983	0.949	17037	0.999
VPS13B	-5.34	8	-1.64	0.0509	894	0.983	0.949	17036	0.999
SLCO5A1	-5.34	8	-1.64	0.051	895	0.983	0.949	17035	0.999
KIF26B	-5.34	8	-1.64	0.051	896	0.983	0.949	17034	0.999
C6orf48	-5.33	8	-1.63	0.0511	897	0.983	0.949	17033	0.999
CUEDC2	-5.33	8	-1.63	0.0511	898	0.983	0.949	17032	0.999
HAPLN2	-5.33	8	-1.63	0.0511	899	0.983	0.949	17031	0.999
XKR7	-5.31	8	-1.63	0.0517	900	0.983	0.948	17030	0.998
IL1RAPL2	-5.31	8	-1.63	0.0518	901	0.983	0.948	17029	0.998
KCNC4	-5.31	8	-1.63	0.0519	902	0.983	0.948	17028	0.998
CDCA4	-5.31	8	-1.63	0.052	903	0.983	0.948	17027	0.998
GPX7	-5.3	8	-1.62	0.0521	904	0.983	0.948	17026	0.998
NUP153	-5.3	8	-1.62	0.0522	905	0.983	0.948	17025	0.998
RNASEH2B	-5.3	8	-1.62	0.0523	906	0.983	0.948	17024	0.998
MS4A1	-5.29	8	-1.62	0.0524	907	0.983	0.948	17023	0.998
PRAME	-5.29	8	-1.62	0.0524	908	0.983	0.948	17022	0.998
SEMG1	-5.29	8	-1.62	0.0525	909	0.983	0.948	17021	0.998
MBD1	-5.29	8	-1.62	0.0525	910	0.983	0.947	17020	0.998
FAM230A	-5.29	8	-1.62	0.0526	911	0.983	0.947	17019	0.998
SLC7A3	-5.29	8	-1.62	0.0527	912	0.983	0.947	17018	0.998
DND1	-5.28	8	-1.62	0.0527	913	0.983	0.947	17017	0.998
MBOAT1	-5.28	8	-1.62	0.0528	914	0.983	0.947	17016	0.998
NUMA1	-5.28	8	-1.62	0.0528	915	0.983	0.947	17015	0.998
MYEOV	-5.28	8	-1.62	0.0529	916	0.983	0.947	17014	0.998
ACTR3	-5.28	8	-1.62	0.053	917	0.983	0.947	17013	0.998
HESX1	-5.28	8	-1.62	0.053	918	0.983	0.947	17012	0.998
GTPBP1	-5.28	8	-1.62	0.053	919	0.983	0.947	17011	0.998
AMER3	-5.28	8	-1.62	0.053	920	0.983	0.947	17010	0.998
DDR1	-5.27	8	-1.61	0.0532	921	0.983	0.947	17009	0.998
DNAH7	-5.27	8	-1.61	0.0532	922	0.983	0.947	17008	0.998
MAP1LC3C	-5.27	8	-1.61	0.0533	923	0.983	0.947	17007	0.998
ME2	-5.27	8	-1.61	0.0534	924	0.983	0.947	17006	0.998
ABCC4	-5.26	8	-1.61	0.0535	925	0.983	0.947	17005	0.998
KANK2	-5.26	8	-1.61	0.0536	926	0.983	0.946	17004	0.998
SLC16A2	-5.26	8	-1.61	0.0537	927	0.983	0.946	17003	0.998
ACTC1	-5.26	8	-1.61	0.0537	928	0.983	0.946	17002	0.998
PROC	-5.25	8	-1.61	0.0538	929	0.983	0.946	17001	0.998
ZC3H13	-4.55	6	-1.61	0.0539	930	0.983	0.946	17000	0.998
ARNTL2	-5.25	8	-1.61	0.0539	931	0.983	0.946	16999	0.998
FOS	-5.25	8	-1.61	0.0539	932	0.983	0.946	16998	0.998
WBP1L	-5.25	8	-1.61	0.054	933	0.983	0.946	16997	0.998
GPR32	-5.25	8	-1.61	0.054	934	0.983	0.946	16996	0.998
SUGP2	-5.25	8	-1.61	0.0541	935	0.983	0.946	16995	0.998
PI15	-5.25	8	-1.61	0.0541	936	0.983	0.946	16994	0.998
CCDC53	-5.24	8	-1.61	0.0542	937	0.983	0.946	16993	0.998
ERCC1	-5.24	8	-1.6	0.0543	938	0.983	0.946	16992	0.998
IGFBP2	-5.24	8	-1.6	0.0543	939	0.983	0.946	16991	0.998
STAG2	-5.24	8	-1.6	0.0543	940	0.983	0.946	16990	0.998
ESPN	-5.24	8	-1.6	0.0543	941	0.983	0.946	16989	0.998
GPX1	-5.24	8	-1.6	0.0543	942	0.983	0.946	16988	0.998
C1GALT1	-5.24	8	-1.6	0.0544	943	0.983	0.946	16987	0.998
TBK1	-5.24	8	-1.6	0.0545	944	0.983	0.946	16986	0.998
SLAMF6	-5.23	8	-1.6	0.0546	945	0.983	0.945	16985	0.998
CRAMP1L	-5.23	8	-1.6	0.0547	946	0.983	0.945	16984	0.998
SMARCC1	-5.23	8	-1.6	0.0547	947	0.983	0.945	16983	0.998
NAT6	-5.22	8	-1.6	0.0549	948	0.983	0.945	16982	0.998
CDK9	-5.22	8	-1.6	0.055	949	0.983	0.945	16981	0.998
LCE3A	-5.22	8	-1.6	0.055	950	0.983	0.945	16980	0.998
EVA1A	-5.22	8	-1.6	0.055	951	0.983	0.945	16979	0.998
TNFRSF8	-5.21	8	-1.6	0.0552	952	0.983	0.945	16978	0.998
MYADM	-4.88	7	-1.6	0.0553	953	0.983	0.945	16977	0.998
RPL35A	-4.51	6	-1.6	0.0553	954	0.983	0.945	16976	0.998
CD38	-5.21	8	-1.59	0.0555	955	0.983	0.945	16975	0.998
ANKRD18A	-2.6	2	-1.59	0.0556	956	0.983	0.944	16974	0.998
GLS	-5.2	8	-1.59	0.0557	957	0.983	0.944	16973	0.998
EIF1AX	-5.2	8	-1.59	0.0557	958	0.983	0.944	16972	0.998
OLIG2	-5.2	8	-1.59	0.0558	959	0.983	0.944	16971	0.998
MRPL18	-5.2	8	-1.59	0.0558	960	0.983	0.944	16970	0.998
C1orf95	-5.2	8	-1.59	0.0559	961	0.983	0.944	16969	0.998
EXOSC3	-5.2	8	-1.59	0.0559	962	0.983	0.944	16968	0.998
GLP1R	-5.19	8	-1.59	0.056	963	0.983	0.944	16967	0.998
C6orf141	-5.19	8	-1.59	0.0561	964	0.983	0.944	16966	0.997
GRIP1	-5.19	8	-1.59	0.0561	965	0.983	0.944	16965	0.997
ILK	-5.19	8	-1.59	0.0562	966	0.983	0.944	16964	0.997
TMBIM4	-5.18	8	-1.59	0.0563	967	0.983	0.944	16963	0.997
C11orf63	-5.18	8	-1.59	0.0563	968	0.983	0.944	16962	0.997
ACADSB	-5.18	8	-1.59	0.0564	969	0.983	0.944	16961	0.997
GSG1L	-5.18	8	-1.59	0.0565	970	0.983	0.944	16960	0.997
PAGR1	-5.18	8	-1.59	0.0565	971	0.983	0.944	16959	0.997
GSC	-5.18	8	-1.58	0.0566	972	0.983	0.943	16958	0.997
OR2G2	-5.18	8	-1.58	0.0566	973	0.983	0.943	16957	0.997
ATP13A2	-5.17	8	-1.58	0.0567	974	0.983	0.943	16956	0.997
RBP4	-5.17	8	-1.58	0.0567	975	0.983	0.943	16955	0.997
ZFP36L1	-5.17	8	-1.58	0.0567	976	0.983	0.943	16954	0.997
PLXNA4	-5.17	8	-1.58	0.0569	977	0.983	0.943	16953	0.997
KLHL26	-5.17	8	-1.58	0.0569	978	0.983	0.943	16952	0.997
SLC16A14	-5.16	8	-1.58	0.0571	979	0.983	0.943	16951	0.997
FAM84A	-5.16	8	-1.58	0.0572	980	0.983	0.943	16950	0.997
GPI	-5.16	8	-1.58	0.0572	981	0.983	0.943	16949	0.997
POLR3E	-5.16	8	-1.58	0.0572	982	0.983	0.943	16948	0.997
CRISPLD2	-5.16	8	-1.58	0.0573	983	0.983	0.943	16947	0.997
CPZ	-5.15	8	-1.58	0.0574	984	0.983	0.943	16946	0.997
CITED1	-5.15	8	-1.58	0.0574	985	0.983	0.943	16945	0.997
UBR5	-5.15	8	-1.58	0.0575	986	0.983	0.942	16944	0.997
TRDMT1	-5.15	8	-1.58	0.0575	987	0.983	0.942	16943	0.997
GDF11	-5.15	8	-1.58	0.0576	988	0.983	0.942	16942	0.997
DENND6B	-5.15	8	-1.58	0.0576	989	0.983	0.942	16941	0.997
NDUFA13	-5.14	8	-1.57	0.0578	990	0.983	0.942	16940	0.997
EMILIN2	-5.14	8	-1.57	0.0578	991	0.983	0.942	16939	0.997
2021-12-01	-5.14	8	-1.57	0.0578	992	0.983	0.942	16938	0.997
YY1	-5.14	8	-1.57	0.0579	993	0.983	0.942	16937	0.997
PSMC3	-5.14	8	-1.57	0.0579	994	0.983	0.942	16936	0.997
DAP3	-5.14	8	-1.57	0.058	995	0.983	0.942	16935	0.997
EFNB1	-5.14	8	-1.57	0.058	996	0.983	0.942	16934	0.997
MEA1	-5.14	8	-1.57	0.058	997	0.983	0.942	16933	0.997
HDX	-5.13	8	-1.57	0.0582	998	0.983	0.942	16932	0.997
MSH4	-5.13	8	-1.57	0.0582	999	0.983	0.942	16931	0.997
MKI67IP	-4.44	6	-1.57	0.0582	1000	0.983	0.942	16930	0.997
TXNRD3	-5.13	8	-1.57	0.0582	1001	0.983	0.942	16929	0.997
PET100	-5.13	8	-1.57	0.0585	1002	0.983	0.942	16928	0.997
ZFX	-5.12	8	-1.57	0.0585	1003	0.983	0.942	16927	0.997
CTSS	-5.12	8	-1.57	0.0585	1004	0.983	0.942	16926	0.997
ETF1	-5.12	8	-1.57	0.0586	1005	0.983	0.941	16925	0.997
SRP9	-5.12	8	-1.57	0.0586	1006	0.983	0.941	16924	0.997
GORASP1	-5.12	8	-1.57	0.0586	1007	0.983	0.941	16923	0.997
ATXN7	-5.12	8	-1.57	0.0586	1008	0.983	0.941	16922	0.997
ARPC5	-5.12	8	-1.57	0.0587	1009	0.983	0.941	16921	0.997
DNMT3B	-5.12	8	-1.57	0.0587	1010	0.983	0.941	16920	0.997
HRNR	-5.12	8	-1.57	0.0587	1011	0.983	0.941	16919	0.997
FCGR2A	-5.12	8	-1.57	0.0587	1012	0.983	0.941	16918	0.997
CES2	-5.12	8	-1.57	0.0587	1013	0.983	0.941	16917	0.997
BCAT2	-5.12	8	-1.56	0.0588	1014	0.983	0.941	16916	0.997
ID3	-5.11	8	-1.56	0.0589	1015	0.983	0.941	16915	0.997
DDX39B	-5.11	8	-1.56	0.0589	1016	0.983	0.941	16914	0.997
AAMP	-5.11	8	-1.56	0.059	1017	0.983	0.941	16913	0.997
METTL17	-5.1	8	-1.56	0.0593	1018	0.983	0.941	16912	0.997
RPP21	-5.1	8	-1.56	0.0594	1019	0.983	0.941	16911	0.997
KTI12	-5.1	8	-1.56	0.0594	1020	0.983	0.941	16910	0.997
USP30	-5.1	8	-1.56	0.0596	1021	0.983	0.94	16909	0.997
FAM8A1	-5.09	8	-1.56	0.0597	1022	0.983	0.94	16908	0.997
CYP2W1	-5.09	8	-1.56	0.0597	1023	0.983	0.94	16907	0.997
CBX2	-5.09	8	-1.56	0.0598	1024	0.983	0.94	16906	0.997
PBX2	-5.09	8	-1.56	0.0598	1025	0.983	0.94	16905	0.997
PLXNA1	-5.09	8	-1.56	0.0599	1026	0.983	0.94	16904	0.997
ZMYM4	-5.09	8	-1.56	0.0599	1027	0.983	0.94	16903	0.997
HTR3B	-5.09	8	-1.56	0.0599	1028	0.983	0.94	16902	0.997
FAM161B	-5.09	8	-1.55	0.06	1029	0.983	0.94	16901	0.997
FAM198A	-5.09	8	-1.55	0.06	1030	0.983	0.94	16900	0.997
DDAH2	-5.08	8	-1.55	0.0601	1031	0.983	0.94	16899	0.997
ERLIN1	-5.08	8	-1.55	0.0602	1032	0.983	0.94	16898	0.997
MRPL51	-5.08	8	-1.55	0.0603	1033	0.983	0.94	16897	0.997
CHCHD7	-5.07	8	-1.55	0.0604	1034	0.983	0.94	16896	0.997
NHLRC4	-5.07	8	-1.55	0.0605	1035	0.983	0.939	16895	0.997
DNTTIP2	-5.07	8	-1.55	0.0606	1036	0.983	0.939	16894	0.997
FAM187B	-5.07	8	-1.55	0.0606	1037	0.983	0.939	16893	0.997
HYOU1	-5.07	8	-1.55	0.0606	1038	0.983	0.939	16892	0.997
KLF1	-5.07	8	-1.55	0.0607	1039	0.983	0.939	16891	0.997
EGFL8	-5.07	8	-1.55	0.0607	1040	0.983	0.939	16890	0.997
TMEM170B	-5.07	8	-1.55	0.0607	1041	0.983	0.939	16889	0.997
DMP1	-5.06	8	-1.55	0.0608	1042	0.983	0.939	16888	0.997
TMEM66	-5.06	8	-1.55	0.0609	1043	0.983	0.939	16887	0.997
S100A5	-5.06	8	-1.55	0.061	1044	0.983	0.939	16886	0.997
A3GALT2	-5.06	8	-1.55	0.0611	1045	0.983	0.939	16885	0.997
INO80	-5.06	8	-1.55	0.0611	1046	0.983	0.939	16884	0.997
PRSS56	-5.06	8	-1.55	0.0612	1047	0.983	0.939	16883	0.997
NFE2L2	-5.05	8	-1.54	0.0612	1048	0.983	0.939	16882	0.997
RNF214	-5.05	8	-1.54	0.0613	1049	0.983	0.939	16881	0.997
PAPSS1	-5.05	8	-1.54	0.0614	1050	0.983	0.939	16880	0.997
MMP23B	-5.05	8	-1.54	0.0614	1051	0.983	0.939	16879	0.997
NARF	-5.05	8	-1.54	0.0614	1052	0.983	0.939	16878	0.997
GPC3	-5.04	8	-1.54	0.0616	1053	0.983	0.938	16877	0.997
APH1A	-5.04	8	-1.54	0.0618	1054	0.983	0.938	16876	0.997
SLC39A3	-5.04	8	-1.54	0.0618	1055	0.983	0.938	16875	0.997
C8orf59	-2.52	2	-1.54	0.062	1056	0.983	0.938	16874	0.997
NPR3	-5.03	8	-1.54	0.062	1057	0.983	0.938	16873	0.997
CENPP	-5.03	8	-1.54	0.062	1058	0.983	0.938	16872	0.997
NRTN	-5.03	8	-1.54	0.0621	1059	0.983	0.938	16871	0.997
HIST1H2BK	-4.36	6	-1.54	0.0622	1060	0.983	0.938	16870	0.997
AP3M1	-5.03	8	-1.54	0.0623	1061	0.983	0.938	16869	0.997
GPR139	-5.02	8	-1.54	0.0624	1062	0.983	0.938	16868	0.997
TMEM255A	-5.02	8	-1.53	0.0625	1063	0.983	0.938	16867	0.997
CSMD2	-5.02	8	-1.53	0.0625	1064	0.983	0.937	16866	0.997
FAM109B	-4.35	6	-1.53	0.0626	1065	0.983	0.937	16865	0.997
AP1G2	-5.02	8	-1.53	0.0627	1066	0.983	0.937	16864	0.996
MAGEL2	-5.02	8	-1.53	0.0627	1067	0.983	0.937	16863	0.996
EBF4	-5.02	8	-1.53	0.0627	1068	0.983	0.937	16862	0.996
AK9	-5.01	8	-1.53	0.0628	1069	0.983	0.937	16861	0.996
CPA1	-5.01	8	-1.53	0.0628	1070	0.983	0.937	16860	0.996
TMEM240	-4.34	6	-1.53	0.0628	1071	0.983	0.937	16859	0.996
CYP19A1	-5.01	8	-1.53	0.0629	1072	0.983	0.937	16858	0.996
COMTD1	-5.01	8	-1.53	0.0629	1073	0.983	0.937	16857	0.996
ADC	-5.01	8	-1.53	0.0631	1074	0.983	0.937	16856	0.996
UNG	-5.01	8	-1.53	0.0631	1075	0.983	0.937	16855	0.996
CYP7B1	-5	8	-1.53	0.0633	1076	0.983	0.937	16854	0.996
KIAA1239	-4.68	7	-1.53	0.0634	1077	0.983	0.937	16853	0.996
EVA1B	-5	8	-1.53	0.0635	1078	0.983	0.936	16852	0.996
MAGEB3	-4.99	8	-1.53	0.0636	1079	0.983	0.936	16851	0.996
RAD21	-4.99	8	-1.53	0.0636	1080	0.983	0.936	16850	0.996
RPL4	-4.99	8	-1.53	0.0636	1081	0.983	0.936	16849	0.996
VCAN	-4.99	8	-1.52	0.0637	1082	0.983	0.936	16848	0.996
PRG3	-4.99	8	-1.52	0.0638	1083	0.983	0.936	16847	0.996
HEPACAM2	-4.99	8	-1.52	0.0638	1084	0.983	0.936	16846	0.996
TFG	-4.99	8	-1.52	0.0639	1085	0.983	0.936	16845	0.996
UNC5B	-4.99	8	-1.52	0.0639	1086	0.983	0.936	16844	0.996
VLDLR	-4.99	8	-1.52	0.0639	1087	0.983	0.936	16843	0.996
IMPACT	-4.99	8	-1.52	0.0639	1088	0.983	0.936	16842	0.996
TXNDC11	-4.99	8	-1.52	0.0639	1089	0.983	0.936	16841	0.996
KCNJ9	-4.99	8	-1.52	0.0639	1090	0.983	0.936	16840	0.996
BROX	-4.98	8	-1.52	0.0639	1091	0.983	0.936	16839	0.996
USP5	-4.98	8	-1.52	0.064	1092	0.983	0.936	16838	0.996
USP27X	-4.98	8	-1.52	0.0641	1093	0.983	0.936	16837	0.996
NHLH2	-4.98	8	-1.52	0.0641	1094	0.983	0.936	16836	0.996
LAMTOR2	-4.98	8	-1.52	0.0643	1095	0.983	0.936	16835	0.996
PNRC2	-4.97	8	-1.52	0.0644	1096	0.983	0.936	16834	0.996
FPR1	-4.97	8	-1.52	0.0645	1097	0.983	0.935	16833	0.996
KIT	-4.97	8	-1.52	0.0646	1098	0.983	0.935	16832	0.996
ZNF683	-4.97	8	-1.52	0.0646	1099	0.983	0.935	16831	0.996
MIA3	-4.97	8	-1.52	0.0647	1100	0.983	0.935	16830	0.996
IL17RA	-4.97	8	-1.52	0.0647	1101	0.983	0.935	16829	0.996
SLC26A6	-4.96	8	-1.52	0.0648	1102	0.983	0.935	16828	0.996
SYPL2	-4.96	8	-1.52	0.0648	1103	0.983	0.935	16827	0.996
DTD2	-4.96	8	-1.51	0.0649	1104	0.983	0.935	16826	0.996
RAC1	-4.96	8	-1.51	0.0649	1105	0.983	0.935	16825	0.996
ANKRD13A	-4.96	8	-1.51	0.0649	1106	0.983	0.935	16824	0.996
CSRP1	-4.96	8	-1.51	0.065	1107	0.983	0.935	16823	0.996
PHTF1	-4.96	8	-1.51	0.0651	1108	0.983	0.935	16822	0.996
ARHGAP28	-4.95	8	-1.51	0.0652	1109	0.983	0.935	16821	0.996
SLBP	-4.95	8	-1.51	0.0652	1110	0.983	0.935	16820	0.996
SYT6	-4.95	8	-1.51	0.0652	1111	0.983	0.935	16819	0.996
KIAA0586	-4.95	8	-1.51	0.0652	1112	0.983	0.935	16818	0.996
ANO4	-4.95	8	-1.51	0.0652	1113	0.983	0.935	16817	0.996
RPA1	-4.95	8	-1.51	0.0653	1114	0.983	0.935	16816	0.996
AKT3	-4.95	8	-1.51	0.0654	1115	0.983	0.935	16815	0.996
LRP11	-4.95	8	-1.51	0.0655	1116	0.983	0.934	16814	0.996
LRRC1	-4.94	8	-1.51	0.0656	1117	0.983	0.934	16813	0.996
STAC3	-4.94	8	-1.51	0.0656	1118	0.983	0.934	16812	0.996
RPS29	-3.49	4	-1.51	0.0657	1119	0.983	0.934	16811	0.996
LCE4A	-4.28	6	-1.51	0.0657	1120	0.983	0.934	16810	0.996
LHFPL4	-4.94	8	-1.51	0.0658	1121	0.983	0.934	16809	0.996
PLCZ1	-4.94	8	-1.51	0.0658	1122	0.983	0.934	16808	0.996
C1orf74	-4.94	8	-1.51	0.0659	1123	0.983	0.934	16807	0.996
SLITRK6	-4.93	8	-1.51	0.066	1124	0.983	0.934	16806	0.996
TRIB3	-4.93	8	-1.51	0.0661	1125	0.983	0.934	16805	0.996
NFAM1	-4.93	8	-1.5	0.0662	1126	0.983	0.934	16804	0.996
OR4D9	-4.93	8	-1.5	0.0662	1127	0.983	0.934	16803	0.996
TUSC2	-4.93	8	-1.5	0.0663	1128	0.983	0.934	16802	0.996
ZNF776	-4.92	8	-1.5	0.0666	1129	0.983	0.933	16801	0.996
HEG1	-4.92	8	-1.5	0.0667	1130	0.983	0.933	16800	0.996
ZNF57	-4.91	8	-1.5	0.0668	1131	0.983	0.933	16799	0.996
TRIM42	-4.91	8	-1.5	0.0669	1132	0.983	0.933	16798	0.996
EGLN3	-4.91	8	-1.5	0.0669	1133	0.983	0.933	16797	0.996
TRIM11	-4.91	8	-1.5	0.067	1134	0.983	0.933	16796	0.996
SLC35F2	-4.91	8	-1.5	0.067	1135	0.983	0.933	16795	0.996
H1FX	-4.91	8	-1.5	0.067	1136	0.983	0.933	16794	0.996
GNRH1	-4.91	8	-1.5	0.0672	1137	0.983	0.933	16793	0.996
AGR3	-4.9	8	-1.5	0.0673	1138	0.983	0.933	16792	0.996
MYH14	-4.9	8	-1.5	0.0673	1139	0.983	0.933	16791	0.996
IQCH	-4.9	8	-1.5	0.0673	1140	0.983	0.933	16790	0.996
TUBA4A	-4.9	8	-1.5	0.0674	1141	0.983	0.933	16789	0.996
PIGT	-4.9	8	-1.5	0.0674	1142	0.983	0.933	16788	0.996
NYX	-4.9	8	-1.49	0.0675	1143	0.983	0.933	16787	0.996
NUP54	-4.9	8	-1.49	0.0675	1144	0.983	0.932	16786	0.996
CD27	-4.9	8	-1.49	0.0675	1145	0.983	0.932	16785	0.996
VWA9	-4.89	8	-1.49	0.0677	1146	0.983	0.932	16784	0.996
OSBPL9	-4.89	8	-1.49	0.0677	1147	0.983	0.932	16783	0.996
PLXNA2	-4.89	8	-1.49	0.0677	1148	0.983	0.932	16782	0.996
FAM84B	-4.89	8	-1.49	0.0678	1149	0.983	0.932	16781	0.996
COTL1	-4.89	8	-1.49	0.0678	1150	0.983	0.932	16780	0.996
SLC22A13	-4.88	8	-1.49	0.0681	1151	0.983	0.932	16779	0.996
MMP14	-4.88	8	-1.49	0.0682	1152	0.983	0.932	16778	0.996
NUP107	-4.88	8	-1.49	0.0683	1153	0.983	0.932	16777	0.996
BRDT	-4.88	8	-1.49	0.0684	1154	0.983	0.932	16776	0.996
RBFOX2	-4.88	8	-1.49	0.0684	1155	0.983	0.932	16775	0.996
S100A7L2	-4.87	8	-1.49	0.0685	1156	0.983	0.932	16774	0.996
PAX1	-4.87	8	-1.49	0.0685	1157	0.983	0.932	16773	0.996
MSC	-4.87	8	-1.49	0.0686	1158	0.983	0.931	16772	0.996
ANKRD11	-4.87	8	-1.49	0.0686	1159	0.983	0.931	16771	0.996
KLHL25	-4.87	8	-1.49	0.0686	1160	0.983	0.931	16770	0.996
HBS1L	-4.87	8	-1.49	0.0686	1161	0.983	0.931	16769	0.996
MCUR1	-4.87	8	-1.49	0.0688	1162	0.983	0.931	16768	0.996
EIF3I	-4.87	8	-1.48	0.0688	1163	0.983	0.931	16767	0.996
C4orf32	-4.87	8	-1.48	0.0688	1164	0.983	0.931	16766	0.996
ZNF428	-4.87	8	-1.48	0.0688	1165	0.983	0.931	16765	0.996
EIF3D	-4.87	8	-1.48	0.0689	1166	0.983	0.931	16764	0.996
HABP2	-4.87	8	-1.48	0.0689	1167	0.983	0.931	16763	0.996
CLK1	-4.87	8	-1.48	0.0689	1168	0.983	0.931	16762	0.996
PPP1R35	-4.87	8	-1.48	0.0689	1169	0.983	0.931	16761	0.996
FANK1	-2.43	2	-1.48	0.069	1170	0.983	0.931	16760	0.996
P2RX2	-4.86	8	-1.48	0.069	1171	0.983	0.931	16759	0.996
DCLRE1B	-4.86	8	-1.48	0.069	1172	0.983	0.931	16758	0.996
EPHA3	-4.86	8	-1.48	0.0691	1173	0.983	0.931	16757	0.996
PTER	-4.86	8	-1.48	0.0692	1174	0.983	0.931	16756	0.996
PARP12	-4.86	8	-1.48	0.0693	1175	0.983	0.931	16755	0.996
ARNTL	-4.85	8	-1.48	0.0693	1176	0.983	0.931	16754	0.996
MAPKAPK2	-4.85	8	-1.48	0.0694	1177	0.983	0.931	16753	0.996
EBF2	-4.85	8	-1.48	0.0694	1178	0.983	0.931	16752	0.996
TBP	-4.85	8	-1.48	0.0695	1179	0.983	0.931	16751	0.996
CHCHD4	-4.85	8	-1.48	0.0695	1180	0.983	0.931	16750	0.996
ZMPSTE24	-4.85	8	-1.48	0.0696	1181	0.983	0.93	16749	0.996
CA2	-4.85	8	-1.48	0.0696	1182	0.983	0.93	16748	0.996
HIST1H2BM	-4.85	8	-1.48	0.0696	1183	0.983	0.93	16747	0.996
IL18RAP	-4.85	8	-1.48	0.0696	1184	0.983	0.93	16746	0.996
PDGFA	-4.85	8	-1.48	0.0696	1185	0.983	0.93	16745	0.996
C12orf73	-4.85	8	-1.48	0.0696	1186	0.983	0.93	16744	0.996
POLA2	-4.85	8	-1.48	0.0696	1187	0.983	0.93	16743	0.996
BANK1	-4.85	8	-1.48	0.0697	1188	0.983	0.93	16742	0.996
LIMCH1	-4.85	8	-1.48	0.0697	1189	0.983	0.93	16741	0.996
PLD4	-4.84	8	-1.48	0.0701	1190	0.983	0.93	16740	0.996
ZNF878	-2.42	2	-1.48	0.0701	1191	0.983	0.93	16739	0.996
TMEM140	-4.84	8	-1.48	0.0701	1192	0.983	0.93	16738	0.996
LIPT1	-4.84	8	-1.47	0.0701	1193	0.983	0.93	16737	0.996
TESK1	-4.84	8	-1.47	0.0701	1194	0.983	0.93	16736	0.996
C15orf38	-3.42	4	-1.47	0.0701	1195	0.983	0.93	16735	0.996
CKMT2	-4.83	8	-1.47	0.0702	1196	0.983	0.93	16734	0.996
DDX56	-4.83	8	-1.47	0.0703	1197	0.983	0.93	16733	0.996
OBFC1	-4.83	8	-1.47	0.0703	1198	0.983	0.93	16732	0.996
IZUMO1	-4.83	8	-1.47	0.0703	1199	0.983	0.93	16731	0.996
NONO	-4.83	8	-1.47	0.0706	1200	0.983	0.929	16730	0.996
OVGP1	-4.83	8	-1.47	0.0706	1201	0.983	0.929	16729	0.996
ARL5C	-4.83	8	-1.47	0.0706	1202	0.983	0.929	16728	0.996
ASH2L	-4.82	8	-1.47	0.0707	1203	0.983	0.929	16727	0.996
COL4A6	-4.82	8	-1.47	0.0708	1204	0.983	0.929	16726	0.996
DCAF6	-4.82	8	-1.47	0.0709	1205	0.983	0.929	16725	0.996
B4GALT2	-4.82	8	-1.47	0.0709	1206	0.983	0.929	16724	0.996
MSTN	-4.82	8	-1.47	0.0709	1207	0.983	0.929	16723	0.996
AP1G1	-4.82	8	-1.47	0.0709	1208	0.983	0.929	16722	0.996
C2orf62	-4.82	8	-1.47	0.071	1209	0.983	0.929	16721	0.996
GALNT2	-4.81	8	-1.47	0.0711	1210	0.983	0.929	16720	0.996
ZNF771	-4.81	8	-1.47	0.0711	1211	0.983	0.929	16719	0.996
NEDD8	-4.16	6	-1.47	0.0714	1212	0.983	0.929	16718	0.996
PSMD14	-4.8	8	-1.46	0.0719	1213	0.983	0.928	16717	0.995
XDH	-4.8	8	-1.46	0.0719	1214	0.983	0.928	16716	0.995
FAM103A1	-4.8	8	-1.46	0.0719	1215	0.983	0.928	16715	0.995
ABCC6	-4.8	8	-1.46	0.0719	1216	0.983	0.928	16714	0.995
DOC2B	-4.79	8	-1.46	0.072	1217	0.983	0.928	16713	0.995
MRPL15	-4.79	8	-1.46	0.072	1218	0.983	0.928	16712	0.995
ATP2B4	-4.79	8	-1.46	0.072	1219	0.983	0.928	16711	0.995
AC016757.3	-4.79	8	-1.46	0.072	1220	0.983	0.928	16710	0.995
MS4A10	-4.79	8	-1.46	0.0721	1221	0.983	0.928	16709	0.995
KRT1	-4.79	8	-1.46	0.0721	1222	0.983	0.928	16708	0.995
NID1	-4.79	8	-1.46	0.0722	1223	0.983	0.928	16707	0.995
C19orf38	-4.79	8	-1.46	0.0723	1224	0.983	0.928	16706	0.995
PPP1R14C	-4.78	8	-1.46	0.0725	1225	0.983	0.927	16705	0.995
CNTNAP4	-4.78	8	-1.46	0.0726	1226	0.983	0.927	16704	0.995
IP6K3	-4.78	8	-1.46	0.0726	1227	0.983	0.927	16703	0.995
FCGR1A	-4.78	8	-1.46	0.0726	1228	0.983	0.927	16702	0.995
IQCB1	-4.78	8	-1.46	0.0728	1229	0.983	0.927	16701	0.995
TAF7	-4.77	8	-1.45	0.0728	1230	0.983	0.927	16700	0.995
RHO	-4.77	8	-1.45	0.0729	1231	0.983	0.927	16699	0.995
JUNB	-4.77	8	-1.45	0.0729	1232	0.983	0.927	16698	0.995
DNAJA1	-4.77	8	-1.45	0.073	1233	0.983	0.927	16697	0.995
SPCS2	-4.77	8	-1.45	0.0731	1234	0.983	0.927	16696	0.995
LYPLAL1	-4.77	8	-1.45	0.0732	1235	0.983	0.927	16695	0.995
SLPI	-4.77	8	-1.45	0.0732	1236	0.983	0.927	16694	0.995
TEDDM1	-4.76	8	-1.45	0.0735	1237	0.983	0.927	16693	0.995
PTBP3	-4.76	8	-1.45	0.0735	1238	0.983	0.926	16692	0.995
ITGB7	-4.76	8	-1.45	0.0736	1239	0.983	0.926	16691	0.995
SEC62	-4.76	8	-1.45	0.0737	1240	0.983	0.926	16690	0.995
OR6A2	-4.76	8	-1.45	0.0737	1241	0.983	0.926	16689	0.995
PPP1R13L	-4.75	8	-1.45	0.0738	1242	0.983	0.926	16688	0.995
VPS28	-4.75	8	-1.45	0.0739	1243	0.983	0.926	16687	0.995
TAL1	-4.75	8	-1.45	0.0739	1244	0.983	0.926	16686	0.995
RUNX3	-4.75	8	-1.45	0.0739	1245	0.983	0.926	16685	0.995
TMEM131	-4.75	8	-1.45	0.074	1246	0.983	0.926	16684	0.995
CADM3	-4.75	8	-1.45	0.0741	1247	0.983	0.926	16683	0.995
PHPT1	-4.75	8	-1.45	0.0741	1248	0.983	0.926	16682	0.995
CHRND	-4.75	8	-1.45	0.0741	1249	0.983	0.926	16681	0.995
DCST2	-4.74	8	-1.45	0.0742	1250	0.983	0.926	16680	0.995
CABP7	-4.44	7	-1.44	0.0742	1251	0.983	0.926	16679	0.995
ADAMTSL2	-4.74	8	-1.44	0.0743	1252	0.983	0.926	16678	0.995
CDC20	-4.74	8	-1.44	0.0744	1253	0.983	0.926	16677	0.995
SLC12A5	-4.74	8	-1.44	0.0745	1254	0.983	0.925	16676	0.995
BMS1	-4.73	8	-1.44	0.0748	1255	0.983	0.925	16675	0.995
SPTBN5	-4.73	8	-1.44	0.0749	1256	0.983	0.925	16674	0.995
CNTLN	-4.73	8	-1.44	0.0749	1257	0.983	0.925	16673	0.995
CTSH	-4.09	6	-1.44	0.0749	1258	0.983	0.925	16672	0.995
MED7	-4.73	8	-1.44	0.075	1259	0.983	0.925	16671	0.995
SLC6A17	-4.73	8	-1.44	0.075	1260	0.983	0.925	16670	0.995
C2	-4.72	8	-1.44	0.0751	1261	0.983	0.925	16669	0.995
KPNA3	-4.72	8	-1.44	0.0752	1262	0.983	0.925	16668	0.995
PLEKHH1	-4.72	8	-1.44	0.0752	1263	0.983	0.925	16667	0.995
IL3	-4.72	8	-1.44	0.0753	1264	0.983	0.925	16666	0.995
BRD9	-4.72	8	-1.44	0.0753	1265	0.983	0.925	16665	0.995
CIRH1A	-4.72	8	-1.44	0.0753	1266	0.983	0.925	16664	0.995
LSMD1	-4.72	8	-1.44	0.0754	1267	0.983	0.925	16663	0.995
OR1L3	-4.71	8	-1.43	0.0757	1268	0.983	0.924	16662	0.995
RIOK1	-4.71	8	-1.43	0.0757	1269	0.983	0.924	16661	0.995
KIF4A	-4.71	8	-1.43	0.0758	1270	0.983	0.924	16660	0.995
CRABP2	-4.71	8	-1.43	0.0759	1271	0.983	0.924	16659	0.995
DMRTA2	-4.71	8	-1.43	0.0759	1272	0.983	0.924	16658	0.995
KBTBD11	-4.71	8	-1.43	0.0759	1273	0.983	0.924	16657	0.995
NDUFS6	-4.71	8	-1.43	0.0759	1274	0.983	0.924	16656	0.995
OR2B2	-4.71	8	-1.43	0.076	1275	0.983	0.924	16655	0.995
PABPC1	-4.71	8	-1.43	0.076	1276	0.983	0.924	16654	0.995
ATP6V0E2	-4.7	8	-1.43	0.076	1277	0.983	0.924	16653	0.995
NUAK2	-4.7	8	-1.43	0.0761	1278	0.983	0.924	16652	0.995
RNF219	-4.7	8	-1.43	0.0763	1279	0.983	0.924	16651	0.995
NPR1	-4.7	8	-1.43	0.0763	1280	0.983	0.924	16650	0.995
ISCU	-4.7	8	-1.43	0.0763	1281	0.983	0.924	16649	0.995
ELF4	-4.7	8	-1.43	0.0764	1282	0.983	0.924	16648	0.995
C2orf53	-4.7	8	-1.43	0.0764	1283	0.983	0.924	16647	0.995
S100A14	-4.7	8	-1.43	0.0764	1284	0.983	0.924	16646	0.995
CDC25A	-4.69	8	-1.43	0.0766	1285	0.983	0.923	16645	0.995
XRCC6BP1	-4.69	8	-1.43	0.0766	1286	0.983	0.923	16644	0.995
PSMA3	-4.69	8	-1.43	0.0768	1287	0.983	0.923	16643	0.995
TMEM132C	-4.69	8	-1.43	0.0768	1288	0.983	0.923	16642	0.995
PRUNE	-4.69	8	-1.43	0.0769	1289	0.983	0.923	16641	0.995
LIX1	-4.69	8	-1.43	0.0769	1290	0.983	0.923	16640	0.995
WNT5A	-4.69	8	-1.43	0.0769	1291	0.983	0.923	16639	0.995
ELOF1	-4.68	8	-1.43	0.0769	1292	0.983	0.923	16638	0.995
SLC32A1	-4.68	8	-1.43	0.077	1293	0.983	0.923	16637	0.995
AGFG2	-4.68	8	-1.43	0.0771	1294	0.983	0.923	16636	0.995
ZNRD1	-4.68	8	-1.43	0.0771	1295	0.983	0.923	16635	0.995
VMP1	-4.68	8	-1.43	0.0771	1296	0.983	0.923	16634	0.995
RIT1	-4.68	8	-1.42	0.0771	1297	0.983	0.923	16633	0.995
TRMT5	-4.68	8	-1.42	0.0771	1298	0.983	0.923	16632	0.995
CIC	-4.68	8	-1.42	0.0772	1299	0.983	0.923	16631	0.995
CLCN7	-4.68	8	-1.42	0.0773	1300	0.983	0.923	16630	0.995
RAN	-4.68	8	-1.42	0.0774	1301	0.983	0.923	16629	0.995
XKR8	-4.67	8	-1.42	0.0775	1302	0.983	0.923	16628	0.995
STX1A	-4.67	8	-1.42	0.0775	1303	0.983	0.922	16627	0.995
CCNT1	-4.67	8	-1.42	0.0775	1304	0.983	0.922	16626	0.995
ZG16	-4.67	8	-1.42	0.0777	1305	0.983	0.922	16625	0.995
FBXO21	-4.67	8	-1.42	0.0777	1306	0.983	0.922	16624	0.995
GPR26	-4.67	8	-1.42	0.0777	1307	0.983	0.922	16623	0.995
CYR61	-4.67	8	-1.42	0.0777	1308	0.983	0.922	16622	0.995
PRSS48	-4.67	8	-1.42	0.0777	1309	0.983	0.922	16621	0.995
IGF2BP2	-4.67	8	-1.42	0.0777	1310	0.983	0.922	16620	0.995
SLC16A8	-4.67	8	-1.42	0.0778	1311	0.983	0.922	16619	0.995
SLC25A44	-4.66	8	-1.42	0.0779	1312	0.983	0.922	16618	0.995
PCDHGC4	-4.66	8	-1.42	0.0779	1313	0.983	0.922	16617	0.995
DHX9	-4.66	8	-1.42	0.078	1314	0.983	0.922	16616	0.995
PLEKHG3	-4.66	8	-1.42	0.078	1315	0.983	0.922	16615	0.995
TIMM8A	-4.66	8	-1.42	0.078	1316	0.983	0.922	16614	0.995
DNAJC13	-4.66	8	-1.42	0.0781	1317	0.983	0.922	16613	0.995
PKHD1	-4.66	8	-1.42	0.0781	1318	0.983	0.922	16612	0.995
NPAS1	-4.66	8	-1.42	0.0781	1319	0.983	0.922	16611	0.995
SPRR4	-4.66	8	-1.42	0.0782	1320	0.983	0.922	16610	0.995
EIF4A1	-4.66	8	-1.42	0.0783	1321	0.983	0.922	16609	0.995
PRR5	-4.66	8	-1.42	0.0783	1322	0.983	0.922	16608	0.995
ANKIB1	-4.66	8	-1.42	0.0783	1323	0.983	0.922	16607	0.995
HENMT1	-4.65	8	-1.42	0.0785	1324	0.983	0.922	16606	0.995
C1orf145	-2.32	2	-1.41	0.0787	1325	0.983	0.921	16605	0.995
TRIM43	-4.65	8	-1.41	0.0787	1326	0.983	0.921	16604	0.995
VSIG8	-4.65	8	-1.41	0.0788	1327	0.983	0.921	16603	0.995
TWIST1	-4.64	8	-1.41	0.0789	1328	0.983	0.921	16602	0.995
TMEM89	-4.64	8	-1.41	0.0789	1329	0.983	0.921	16601	0.995
KCNJ5	-4.64	8	-1.41	0.079	1330	0.983	0.921	16600	0.995
TCEA2	-4.64	8	-1.41	0.0792	1331	0.983	0.921	16599	0.995
WDR24	-4.64	8	-1.41	0.0792	1332	0.983	0.921	16598	0.995
C6orf89	-4.64	8	-1.41	0.0793	1333	0.983	0.921	16597	0.995
ZMYND10	-4.64	8	-1.41	0.0793	1334	0.983	0.921	16596	0.995
MAB21L1	-4.63	8	-1.41	0.0793	1335	0.983	0.921	16595	0.995
MSH6	-4.63	8	-1.41	0.0796	1336	0.983	0.92	16594	0.994
AUNIP	-4.63	8	-1.41	0.0796	1337	0.983	0.92	16593	0.994
EIF2B1	-4.62	8	-1.41	0.0799	1338	0.983	0.92	16592	0.994
MON1A	-4.62	8	-1.41	0.0799	1339	0.983	0.92	16591	0.994
TM4SF4	-4.62	8	-1.41	0.0799	1340	0.983	0.92	16590	0.994
TCP1	-4.62	8	-1.41	0.0799	1341	0.983	0.92	16589	0.994
MORN3	-4.62	8	-1.41	0.0799	1342	0.983	0.92	16588	0.994
TRIP10	-4.62	8	-1.41	0.08	1343	0.983	0.92	16587	0.994
AGAP2	-4.62	8	-1.4	0.0801	1344	0.983	0.92	16586	0.994
FAM3A	-4.61	8	-1.4	0.0802	1345	0.983	0.92	16585	0.994
CCR7	-4.61	8	-1.4	0.0802	1346	0.983	0.92	16584	0.994
EPM2AIP1	-4.61	8	-1.4	0.0803	1347	0.983	0.92	16583	0.994
FBXO46	-4.61	8	-1.4	0.0804	1348	0.983	0.92	16582	0.994
ZNF768	-4.61	8	-1.4	0.0804	1349	0.983	0.92	16581	0.994
IL17RB	-4.61	8	-1.4	0.0805	1350	0.983	0.92	16580	0.994
RBM20	-4.61	8	-1.4	0.0805	1351	0.983	0.919	16579	0.994
TMC7	-4.61	8	-1.4	0.0806	1352	0.983	0.919	16578	0.994
CDK2	-4.61	8	-1.4	0.0807	1353	0.983	0.919	16577	0.994
ZKSCAN5	-4.6	8	-1.4	0.081	1354	0.983	0.919	16576	0.994
ACTR5	-4.6	8	-1.4	0.081	1355	0.983	0.919	16575	0.994
DSCAM	-4.6	8	-1.4	0.0812	1356	0.983	0.919	16574	0.994
KRT2	-4.59	8	-1.4	0.0812	1357	0.983	0.919	16573	0.994
C19orf26	-4.59	8	-1.4	0.0813	1358	0.983	0.919	16572	0.994
CSTA	-3.98	6	-1.4	0.0813	1359	0.983	0.919	16571	0.994
CD40LG	-4.59	8	-1.4	0.0813	1360	0.983	0.919	16570	0.994
TP53I3	-4.59	8	-1.4	0.0813	1361	0.983	0.919	16569	0.994
C18orf8	-4.59	8	-1.4	0.0814	1362	0.983	0.919	16568	0.994
SLC26A3	-4.59	8	-1.4	0.0814	1363	0.983	0.919	16567	0.994
PEX7	-4.59	8	-1.4	0.0814	1364	0.983	0.919	16566	0.994
OCSTAMP	-4.59	8	-1.39	0.0815	1365	0.983	0.918	16565	0.994
TBXA2R	-4.59	8	-1.39	0.0817	1366	0.983	0.918	16564	0.994
ATP2A1	-4.58	8	-1.39	0.0817	1367	0.983	0.918	16563	0.994
POU1F1	-4.58	8	-1.39	0.0818	1368	0.983	0.918	16562	0.994
ASPH	-4.58	8	-1.39	0.0818	1369	0.983	0.918	16561	0.994
PSMD3	-4.58	8	-1.39	0.0818	1370	0.983	0.918	16560	0.994
WDR53	-4.58	8	-1.39	0.0818	1371	0.983	0.918	16559	0.994
FMO2	-4.58	8	-1.39	0.0818	1372	0.983	0.918	16558	0.994
QARS	-4.58	8	-1.39	0.0818	1373	0.983	0.918	16557	0.994
RABL5	-4.58	8	-1.39	0.0819	1374	0.983	0.918	16556	0.994
TSPAN19	-4.58	8	-1.39	0.082	1375	0.983	0.918	16555	0.994
SPATS1	-4.58	8	-1.39	0.082	1376	0.983	0.918	16554	0.994
CLCNKA	-4.58	8	-1.39	0.082	1377	0.983	0.918	16553	0.994
LRRC8C	-4.58	8	-1.39	0.0821	1378	0.983	0.918	16552	0.994
TRIP6	-4.57	8	-1.39	0.0822	1379	0.983	0.918	16551	0.994
NARS	-4.57	8	-1.39	0.0823	1380	0.983	0.918	16550	0.994
WDR31	-4.57	8	-1.39	0.0823	1381	0.983	0.918	16549	0.994
HSF4	-4.57	8	-1.39	0.0824	1382	0.983	0.918	16548	0.994
PYGO1	-4.57	8	-1.39	0.0824	1383	0.983	0.918	16547	0.994
NUMBL	-4.57	8	-1.39	0.0825	1384	0.983	0.918	16546	0.994
ALYREF	-4.57	8	-1.39	0.0825	1385	0.983	0.918	16545	0.994
TMIGD2	-4.57	8	-1.39	0.0825	1386	0.983	0.917	16544	0.994
HIST3H2A	-4.56	8	-1.39	0.0827	1387	0.983	0.917	16543	0.994
ZNF697	-4.56	8	-1.39	0.0827	1388	0.983	0.917	16542	0.994
SCP2	-4.56	8	-1.39	0.0827	1389	0.983	0.917	16541	0.994
CREBL2	-4.56	8	-1.39	0.0827	1390	0.983	0.917	16540	0.994
ECEL1	-4.56	8	-1.39	0.0829	1391	0.983	0.917	16539	0.994
HSPBP1	-4.56	8	-1.39	0.0829	1392	0.983	0.917	16538	0.994
RPS4X	-2.28	2	-1.39	0.0829	1393	0.983	0.917	16537	0.994
PSMB8	-4.56	8	-1.38	0.0831	1394	0.983	0.917	16536	0.994
CHPT1	-4.55	8	-1.38	0.0832	1395	0.983	0.917	16535	0.994
PCLO	-4.55	8	-1.38	0.0832	1396	0.983	0.917	16534	0.994
FRMD1	-4.55	8	-1.38	0.0833	1397	0.983	0.917	16533	0.994
BRD4	-4.55	8	-1.38	0.0833	1398	0.983	0.917	16532	0.994
USP32	-4.55	8	-1.38	0.0836	1399	0.983	0.916	16531	0.994
PNPLA3	-4.55	8	-1.38	0.0836	1400	0.983	0.916	16530	0.994
GATAD2B	-4.54	8	-1.38	0.0836	1401	0.983	0.916	16529	0.994
PGRMC1	-4.54	8	-1.38	0.0837	1402	0.983	0.916	16528	0.994
SEC11A	-4.54	8	-1.38	0.0837	1403	0.983	0.916	16527	0.994
CD1B	-4.54	8	-1.38	0.0837	1404	0.983	0.916	16526	0.994
FKBP3	-4.54	8	-1.38	0.0837	1405	0.983	0.916	16525	0.994
WWTR1	-4.54	8	-1.38	0.0839	1406	0.983	0.916	16524	0.994
ARMS2	-4.54	8	-1.38	0.0839	1407	0.983	0.916	16523	0.994
CLCA1	-4.54	8	-1.38	0.084	1408	0.983	0.916	16522	0.994
NHLRC3	-4.54	8	-1.38	0.084	1409	0.983	0.916	16521	0.994
RPF1	-4.54	8	-1.38	0.0841	1410	0.983	0.916	16520	0.994
OGDH	-4.54	8	-1.38	0.0841	1411	0.983	0.916	16519	0.994
OR2AJ1	-4.54	8	-1.38	0.0841	1412	0.983	0.916	16518	0.994
S100A9	-4.53	8	-1.38	0.0842	1413	0.983	0.916	16517	0.994
DOCK4	-4.53	8	-1.38	0.0843	1414	0.983	0.916	16516	0.994
TMPPE	-4.24	7	-1.38	0.0843	1415	0.983	0.916	16515	0.994
LAMP1	-4.53	8	-1.38	0.0844	1416	0.983	0.916	16514	0.994
MYC	-4.53	8	-1.38	0.0845	1417	0.983	0.915	16513	0.994
MIER1	-4.53	8	-1.38	0.0846	1418	0.983	0.915	16512	0.994
AKIRIN2	-4.52	8	-1.37	0.0849	1419	0.983	0.915	16511	0.994
NRBP1	-4.51	8	-1.37	0.0852	1420	0.983	0.915	16510	0.993
HSD17B12	-4.51	8	-1.37	0.0854	1421	0.983	0.915	16509	0.993
CASC5	-4.51	8	-1.37	0.0854	1422	0.983	0.915	16508	0.993
RWDD2A	-4.51	8	-1.37	0.0855	1423	0.983	0.915	16507	0.993
CIDEC	-4.51	8	-1.37	0.0855	1424	0.983	0.914	16506	0.993
CDH11	-4.51	8	-1.37	0.0855	1425	0.983	0.914	16505	0.993
GPR56	-4.51	8	-1.37	0.0856	1426	0.983	0.914	16504	0.993
NUDT17	-4.5	8	-1.37	0.0857	1427	0.983	0.914	16503	0.993
ARL2BP	-3.18	4	-1.37	0.0858	1428	0.983	0.914	16502	0.993
CKS2	-4.5	8	-1.37	0.0858	1429	0.983	0.914	16501	0.993
PRMT6	-4.5	8	-1.37	0.0858	1430	0.983	0.914	16500	0.993
SLC25A36	-4.5	8	-1.37	0.0859	1431	0.983	0.914	16499	0.993
NID2	-4.5	8	-1.37	0.086	1432	0.983	0.914	16498	0.993
COL8A2	-4.5	8	-1.37	0.0861	1433	0.983	0.914	16497	0.993
VCL	-4.5	8	-1.36	0.0861	1434	0.983	0.914	16496	0.993
SESN1	-4.49	8	-1.36	0.0862	1435	0.983	0.914	16495	0.993
COG2	-4.49	8	-1.36	0.0863	1436	0.983	0.914	16494	0.993
PRKCG	-4.49	8	-1.36	0.0864	1437	0.983	0.914	16493	0.993
ALDH5A1	-4.49	8	-1.36	0.0864	1438	0.983	0.914	16492	0.993
MRPL3	-4.49	8	-1.36	0.0864	1439	0.983	0.914	16491	0.993
WLS	-4.49	8	-1.36	0.0865	1440	0.983	0.914	16490	0.993
HSD17B8	-4.49	8	-1.36	0.0866	1441	0.983	0.913	16489	0.993
RPP38	-4.48	8	-1.36	0.087	1442	0.983	0.913	16488	0.993
NDST2	-4.48	8	-1.36	0.087	1443	0.983	0.913	16487	0.993
RUVBL1	-4.47	8	-1.36	0.0872	1444	0.983	0.913	16486	0.993
TUBA8	-4.47	8	-1.36	0.0872	1445	0.983	0.913	16485	0.993
ILDR2	-4.47	8	-1.36	0.0873	1446	0.983	0.913	16484	0.993
CARM1	-4.47	8	-1.36	0.0873	1447	0.983	0.913	16483	0.993
SAP30	-4.47	8	-1.36	0.0874	1448	0.983	0.913	16482	0.993
CDC27	-4.47	8	-1.36	0.0874	1449	0.983	0.913	16481	0.993
COL6A6	-4.47	8	-1.36	0.0875	1450	0.983	0.912	16480	0.993
PZP	-4.47	8	-1.36	0.0876	1451	0.983	0.912	16479	0.993
CELF5	-4.46	8	-1.35	0.0877	1452	0.983	0.912	16478	0.993
CPN2	-4.46	8	-1.35	0.0878	1453	0.983	0.912	16477	0.993
CCR2	-4.46	8	-1.35	0.0879	1454	0.983	0.912	16476	0.993
HTR1F	-4.45	8	-1.35	0.0882	1455	0.983	0.912	16475	0.992
COG8	-4.45	8	-1.35	0.0883	1456	0.983	0.912	16474	0.992
IQCA1	-4.45	8	-1.35	0.0885	1457	0.983	0.912	16473	0.992
OR5AR1	-4.45	8	-1.35	0.0885	1458	0.983	0.911	16472	0.992
RPS6KC1	-4.45	8	-1.35	0.0885	1459	0.983	0.911	16471	0.992
RPS4Y2	-2.22	2	-1.35	0.0886	1460	0.983	0.911	16470	0.992
CAMK2G	-4.45	8	-1.35	0.0887	1461	0.983	0.911	16469	0.992
ACSF2	-4.44	8	-1.35	0.0887	1462	0.983	0.911	16468	0.992
IVL	-4.44	8	-1.35	0.0887	1463	0.983	0.911	16467	0.992
IL12RB1	-4.44	8	-1.35	0.0889	1464	0.983	0.911	16466	0.992
C4B	-2.22	2	-1.35	0.089	1465	0.983	0.911	16465	0.992
ZNF330	-4.44	8	-1.35	0.0891	1466	0.983	0.911	16464	0.992
CGRRF1	-4.44	8	-1.35	0.0891	1467	0.983	0.911	16463	0.992
FAM20A	-4.43	8	-1.34	0.0893	1468	0.983	0.911	16462	0.992
SLC25A23	-4.43	8	-1.34	0.0895	1469	0.983	0.911	16461	0.992
DLX3	-4.43	8	-1.34	0.0897	1470	0.983	0.91	16460	0.992
CPEB1	-4.43	8	-1.34	0.0897	1471	0.983	0.91	16459	0.992
ZNHIT3	-4.42	8	-1.34	0.0897	1472	0.983	0.91	16458	0.992
PSIP1	-4.42	8	-1.34	0.0899	1473	0.983	0.91	16457	0.992
IFNA5	-2.21	2	-1.34	0.0899	1474	0.983	0.91	16456	0.992
GLTP	-4.42	8	-1.34	0.09	1475	0.983	0.91	16455	0.992
C22orf24	-4.42	8	-1.34	0.09	1476	0.983	0.91	16454	0.992
SKA2	-4.42	8	-1.34	0.0901	1477	0.983	0.91	16453	0.992
UBA3	-4.42	8	-1.34	0.0901	1478	0.983	0.91	16452	0.992
TRIM39	-4.42	8	-1.34	0.0901	1479	0.983	0.91	16451	0.992
DENND4B	-4.42	8	-1.34	0.0901	1480	0.983	0.91	16450	0.992
AP1S2	-4.42	8	-1.34	0.0901	1481	0.983	0.91	16449	0.992
UHRF2	-4.42	8	-1.34	0.0902	1482	0.983	0.91	16448	0.992
PAG1	-4.42	8	-1.34	0.0902	1483	0.983	0.91	16447	0.992
PSME3	-4.41	8	-1.34	0.0903	1484	0.983	0.91	16446	0.992
OLAH	-4.41	8	-1.34	0.0904	1485	0.983	0.91	16445	0.992
YY2	-4.41	8	-1.34	0.0904	1486	0.983	0.91	16444	0.992
MEGF11	-4.41	8	-1.34	0.0905	1487	0.983	0.909	16443	0.992
NR1H4	-4.41	8	-1.34	0.0906	1488	0.983	0.909	16442	0.992
THOC7	-4.41	8	-1.34	0.0906	1489	0.983	0.909	16441	0.992
CTSC	-4.41	8	-1.34	0.0908	1490	0.983	0.909	16440	0.992
TCHH	-4.4	8	-1.34	0.0909	1491	0.983	0.909	16439	0.992
HSD3B2	-4.4	8	-1.34	0.0909	1492	0.983	0.909	16438	0.992
LRRC41	-4.4	8	-1.34	0.0909	1493	0.983	0.909	16437	0.992
ATF7	-4.4	8	-1.33	0.091	1494	0.983	0.909	16436	0.992
GATA3	-4.4	8	-1.33	0.091	1495	0.983	0.909	16435	0.992
GPR174	-4.4	8	-1.33	0.0911	1496	0.983	0.909	16434	0.992
LINGO1	-4.4	8	-1.33	0.0911	1497	0.983	0.909	16433	0.992
CHRNA4	-4.4	8	-1.33	0.0911	1498	0.983	0.909	16432	0.992
NOVA1	-4.4	8	-1.33	0.0911	1499	0.983	0.909	16431	0.992
C19orf71	-4.4	8	-1.33	0.0911	1500	0.983	0.909	16430	0.992
NDUFS7	-4.4	8	-1.33	0.0912	1501	0.983	0.909	16429	0.992
COX4I1	-4.4	8	-1.33	0.0912	1502	0.983	0.909	16428	0.992
ANP32B	-4.4	8	-1.33	0.0913	1503	0.983	0.909	16427	0.992
OIT3	-4.39	8	-1.33	0.0913	1504	0.983	0.909	16426	0.992
B3GNTL1	-4.39	8	-1.33	0.0914	1505	0.983	0.909	16425	0.992
LGALS8	-4.39	8	-1.33	0.0917	1506	0.983	0.908	16424	0.992
ALK	-4.39	8	-1.33	0.0917	1507	0.983	0.908	16423	0.992
IKBKAP	-4.39	8	-1.33	0.0917	1508	0.983	0.908	16422	0.992
ZNF257	-4.38	8	-1.33	0.0918	1509	0.983	0.908	16421	0.992
TUBB	-4.38	8	-1.33	0.0919	1510	0.983	0.908	16420	0.992
DIS3L	-4.38	8	-1.33	0.0919	1511	0.983	0.908	16419	0.992
GOT1L1	-4.38	8	-1.33	0.092	1512	0.983	0.908	16418	0.992
LAMTOR5	-4.38	8	-1.33	0.092	1513	0.983	0.908	16417	0.992
BUD13	-4.38	8	-1.33	0.0921	1514	0.983	0.908	16416	0.992
OAS3	-4.38	8	-1.33	0.0922	1515	0.983	0.908	16415	0.992
SLC27A5	-4.38	8	-1.33	0.0923	1516	0.983	0.908	16414	0.992
TMEM209	-4.37	8	-1.33	0.0924	1517	0.983	0.908	16413	0.991
CMC2	-2.19	2	-1.33	0.0925	1518	0.983	0.908	16412	0.991
CHSY1	-4.37	8	-1.32	0.0926	1519	0.983	0.907	16411	0.991
TIMP4	-4.37	8	-1.32	0.0926	1520	0.983	0.907	16410	0.991
BTBD3	-4.37	8	-1.32	0.0926	1521	0.983	0.907	16409	0.991
TMEM159	-4.37	8	-1.32	0.0927	1522	0.983	0.907	16408	0.991
WARS	-4.37	8	-1.32	0.0927	1523	0.983	0.907	16407	0.991
B3GALT4	-4.37	8	-1.32	0.0928	1524	0.983	0.907	16406	0.991
ZBTB11	-4.37	8	-1.32	0.0928	1525	0.983	0.907	16405	0.991
POLA1	-4.37	8	-1.32	0.0928	1526	0.983	0.907	16404	0.991
KCNN3	-4.37	8	-1.32	0.0928	1527	0.983	0.907	16403	0.991
TTC36	-4.36	8	-1.32	0.093	1528	0.983	0.907	16402	0.991
SIRT5	-4.36	8	-1.32	0.093	1529	0.983	0.907	16401	0.991
MBTD1	-4.36	8	-1.32	0.093	1530	0.983	0.907	16400	0.991
PAPLN	-4.36	8	-1.32	0.093	1531	0.983	0.907	16399	0.991
YWHAG	-4.36	8	-1.32	0.0932	1532	0.983	0.907	16398	0.991
FAM177B	-4.36	8	-1.32	0.0933	1533	0.983	0.907	16397	0.991
MUC13	-4.35	8	-1.32	0.0935	1534	0.983	0.907	16396	0.991
SLC9A2	-4.35	8	-1.32	0.0935	1535	0.983	0.906	16395	0.991
TMEM108	-4.35	8	-1.32	0.0935	1536	0.983	0.906	16394	0.991
PNPLA6	-4.35	8	-1.32	0.0938	1537	0.983	0.906	16393	0.991
PDCL2	-4.34	8	-1.32	0.094	1538	0.983	0.906	16392	0.991
C3orf22	-4.34	8	-1.32	0.094	1539	0.983	0.906	16391	0.991
DLGAP5	-4.34	8	-1.32	0.0941	1540	0.983	0.906	16390	0.991
RGPD2	-3.76	6	-1.32	0.0942	1541	0.983	0.906	16389	0.991
TMED2	-4.34	8	-1.31	0.0943	1542	0.983	0.906	16388	0.991
OAS1	-4.34	8	-1.31	0.0944	1543	0.983	0.906	16387	0.991
POLR3A	-4.34	8	-1.31	0.0944	1544	0.983	0.906	16386	0.991
GTF3C4	-3.76	6	-1.31	0.0944	1545	0.983	0.906	16385	0.991
SLC45A2	-4.33	8	-1.31	0.0945	1546	0.983	0.905	16384	0.991
SUCLG1	-4.33	8	-1.31	0.0946	1547	0.983	0.905	16383	0.991
DCP1B	-4.33	8	-1.31	0.0947	1548	0.983	0.905	16382	0.991
COPE	-4.33	8	-1.31	0.0947	1549	0.983	0.905	16381	0.991
CHIC1	-4.33	8	-1.31	0.0948	1550	0.983	0.905	16380	0.991
CDK8	-4.32	8	-1.31	0.095	1551	0.983	0.905	16379	0.991
LSM2	-4.32	8	-1.31	0.0952	1552	0.983	0.905	16378	0.991
SLC40A1	-4.32	8	-1.31	0.0952	1553	0.983	0.905	16377	0.991
TRMT61A	-4.32	8	-1.31	0.0952	1554	0.983	0.905	16376	0.991
AGRN	-4.32	8	-1.31	0.0953	1555	0.983	0.905	16375	0.991
HHLA3	-4.32	8	-1.31	0.0954	1556	0.983	0.905	16374	0.99
CHP2	-4.31	8	-1.31	0.0957	1557	0.983	0.904	16373	0.99
PRSS38	-4.31	8	-1.31	0.0957	1558	0.983	0.904	16372	0.99
ALG11	-4.31	8	-1.31	0.0957	1559	0.983	0.904	16371	0.99
CENPBD1	-4.31	8	-1.31	0.0958	1560	0.983	0.904	16370	0.99
PRRC2C	-4.31	8	-1.31	0.0959	1561	0.983	0.904	16369	0.99
HAUS6	-4.31	8	-1.3	0.096	1562	0.983	0.904	16368	0.99
MFSD6	-4.3	8	-1.3	0.0962	1563	0.983	0.904	16367	0.99
TREM1	-4.3	8	-1.3	0.0963	1564	0.983	0.904	16366	0.99
DXO	-4.3	8	-1.3	0.0963	1565	0.983	0.904	16365	0.99
XKR3	-4.3	8	-1.3	0.0963	1566	0.983	0.904	16364	0.99
WDR62	-4.3	8	-1.3	0.0965	1567	0.983	0.904	16363	0.99
PI4KA	-4.3	8	-1.3	0.0965	1568	0.983	0.903	16362	0.99
SECISBP2L	-4.3	8	-1.3	0.0966	1569	0.983	0.903	16361	0.99
AP3S2	-3.72	6	-1.3	0.0966	1570	0.983	0.903	16360	0.99
TMEM45A	-4.3	8	-1.3	0.0967	1571	0.983	0.903	16359	0.99
TRA2B	-4.3	8	-1.3	0.0967	1572	0.983	0.903	16358	0.99
DCAF4	-4.29	8	-1.3	0.0967	1573	0.983	0.903	16357	0.99
TREX1	-4.29	8	-1.3	0.0968	1574	0.983	0.903	16356	0.99
GOLGA2	-4.29	8	-1.3	0.0969	1575	0.983	0.903	16355	0.99
GTF2H3	-4.29	8	-1.3	0.097	1576	0.983	0.903	16354	0.99
TTK	-4.29	8	-1.3	0.0971	1577	0.983	0.903	16353	0.99
RD3	-4.29	8	-1.3	0.0971	1578	0.983	0.903	16352	0.99
ZNF473	-4.29	8	-1.3	0.0971	1579	0.983	0.903	16351	0.99
NSUN4	-4.29	8	-1.3	0.0971	1580	0.983	0.903	16350	0.99
ABCB7	-4.29	8	-1.3	0.0971	1581	0.983	0.903	16349	0.99
UBXN2B	-4.29	8	-1.3	0.0972	1582	0.983	0.903	16348	0.99
C20orf166	-4.28	8	-1.3	0.0973	1583	0.983	0.903	16347	0.99
PWWP2B	-4.28	8	-1.3	0.0975	1584	0.983	0.903	16346	0.99
NAV1	-4.28	8	-1.3	0.0975	1585	0.983	0.903	16345	0.99
USP11	-4.28	8	-1.3	0.0976	1586	0.983	0.902	16344	0.99
ZC3H12B	-4.28	8	-1.29	0.0977	1587	0.983	0.902	16343	0.99
RAB3B	-4.28	8	-1.29	0.0978	1588	0.983	0.902	16342	0.99
C1orf50	-4.27	8	-1.29	0.0978	1589	0.983	0.902	16341	0.99
RPS4Y1	-3.02	4	-1.29	0.0978	1590	0.983	0.902	16340	0.99
PLK1	-4.27	8	-1.29	0.0979	1591	0.983	0.902	16339	0.99
PPP1CC	-4.27	8	-1.29	0.098	1592	0.983	0.902	16338	0.99
COL7A1	-4.27	8	-1.29	0.0982	1593	0.983	0.902	16337	0.99
FAM222A	-4.27	8	-1.29	0.0982	1594	0.983	0.902	16336	0.99
HMX1	-4.27	8	-1.29	0.0983	1595	0.983	0.902	16335	0.99
CR2	-3.37	5	-1.29	0.0984	1596	0.983	0.902	16334	0.99
NDUFA6	-4.26	8	-1.29	0.0984	1597	0.983	0.902	16333	0.99
GADD45G	-4.26	8	-1.29	0.0984	1598	0.983	0.902	16332	0.99
DARS	-4.26	8	-1.29	0.0985	1599	0.983	0.901	16331	0.99
TIFA	-4.26	8	-1.29	0.0986	1600	0.983	0.901	16330	0.99
NR2C2AP	-4.26	8	-1.29	0.0987	1601	0.983	0.901	16329	0.99
KIF13A	-4.26	8	-1.29	0.0987	1602	0.983	0.901	16328	0.99
KIAA0020	-4.26	8	-1.29	0.0988	1603	0.983	0.901	16327	0.99
RPA2	-4.25	8	-1.29	0.0991	1604	0.983	0.901	16326	0.989
DNAJC19	-3.68	6	-1.29	0.0991	1605	0.983	0.901	16325	0.989
CHN2	-4.25	8	-1.29	0.0992	1606	0.983	0.901	16324	0.989
SGSH	-4.25	8	-1.29	0.0992	1607	0.983	0.901	16323	0.989
BEND5	-4.25	8	-1.29	0.0993	1608	0.983	0.901	16322	0.989
TXNRD2	-4.25	8	-1.28	0.0994	1609	0.983	0.901	16321	0.989
ABHD14B	-4.24	8	-1.28	0.0995	1610	0.983	0.9	16320	0.989
SFN	-4.24	8	-1.28	0.0998	1611	0.983	0.9	16319	0.989
POU5F2	-4.24	8	-1.28	0.0999	1612	0.983	0.9	16318	0.989
ERMAP	-3.96	7	-1.28	0.1	1613	0.983	0.9	16317	0.989
MRPL36	-4.23	8	-1.28	0.1	1614	0.983	0.9	16316	0.989
VTCN1	-4.23	8	-1.28	0.1	1615	0.983	0.9	16315	0.989
EPOR	-4.23	8	-1.28	0.1	1616	0.983	0.9	16314	0.989
GJA5	-4.23	8	-1.28	0.1	1617	0.983	0.9	16313	0.989
FANCD2OS	-4.23	8	-1.28	0.1	1618	0.983	0.9	16312	0.989
RABL6	-4.23	8	-1.28	0.1	1619	0.983	0.9	16311	0.989
UGT1A6	-4.23	8	-1.28	0.1	1620	0.983	0.9	16310	0.989
ETFA	-4.23	8	-1.28	0.101	1621	0.983	0.899	16309	0.989
MYRFL	-4.22	8	-1.28	0.101	1622	0.983	0.899	16308	0.989
GNL1	-4.22	8	-1.28	0.101	1623	0.983	0.899	16307	0.989
BTN3A1	-4.22	8	-1.28	0.101	1624	0.983	0.899	16306	0.989
LRRC2	-4.22	8	-1.28	0.101	1625	0.983	0.899	16305	0.989
FGR	-4.22	8	-1.28	0.101	1626	0.983	0.899	16304	0.989
RC3H1	-4.22	8	-1.28	0.101	1627	0.983	0.899	16303	0.989
CYP2C8	-4.21	8	-1.27	0.101	1628	0.983	0.899	16302	0.988
HHLA2	-4.21	8	-1.27	0.101	1629	0.983	0.899	16301	0.988
GABRA4	-4.21	8	-1.27	0.101	1630	0.983	0.899	16300	0.988
ATP6V0B	-4.21	8	-1.27	0.101	1631	0.983	0.899	16299	0.988
ACVR2B	-4.21	8	-1.27	0.101	1632	0.983	0.899	16298	0.988
CHRD	-4.21	8	-1.27	0.101	1633	0.983	0.899	16297	0.988
ASXL1	-4.21	8	-1.27	0.102	1634	0.983	0.898	16296	0.988
TUSC1	-4.21	8	-1.27	0.102	1635	0.983	0.898	16295	0.988
RBM19	-4.21	8	-1.27	0.102	1636	0.983	0.898	16294	0.988
RPS27A	-2.1	2	-1.27	0.102	1637	0.983	0.898	16293	0.988
NUPL1	-4.2	8	-1.27	0.102	1638	0.983	0.898	16292	0.988
OPN1LW	-2.1	2	-1.27	0.102	1639	0.983	0.898	16291	0.988
SCYL3	-4.2	8	-1.27	0.102	1640	0.983	0.898	16290	0.988
COL11A2	-4.2	8	-1.27	0.102	1641	0.983	0.898	16289	0.988
ALAD	-4.2	8	-1.27	0.102	1642	0.983	0.898	16288	0.988
NRL	-4.2	8	-1.27	0.102	1643	0.983	0.898	16287	0.988
EIF2B4	-4.19	8	-1.27	0.102	1644	0.983	0.898	16286	0.988
OPRD1	-4.19	8	-1.27	0.102	1645	0.983	0.898	16285	0.988
RGS7BP	-4.19	8	-1.27	0.102	1646	0.983	0.898	16284	0.988
TPM2	-4.19	8	-1.27	0.102	1647	0.983	0.898	16283	0.988
RPL41	-2.1	2	-1.27	0.102	1648	0.983	0.898	16282	0.988
ACVR1C	-4.19	8	-1.27	0.103	1649	0.983	0.897	16281	0.988
TMEM59L	-4.19	8	-1.27	0.103	1650	0.983	0.897	16280	0.988
KIF21A	-4.19	8	-1.27	0.103	1651	0.983	0.897	16279	0.988
TWF1	-4.19	8	-1.27	0.103	1652	0.983	0.897	16278	0.988
HTRA1	-4.19	8	-1.27	0.103	1653	0.983	0.897	16277	0.988
NMBR	-4.19	8	-1.27	0.103	1654	0.983	0.897	16276	0.988
GLRX5	-4.19	8	-1.27	0.103	1655	0.983	0.897	16275	0.988
APEH	-4.18	8	-1.27	0.103	1656	0.983	0.897	16274	0.988
SREK1IP1	-2.09	2	-1.26	0.103	1657	0.983	0.897	16273	0.988
PAPL	-4.18	8	-1.26	0.103	1658	0.983	0.897	16272	0.988
CXorf48	-4.18	8	-1.26	0.103	1659	0.983	0.897	16271	0.988
GPN3	-4.18	8	-1.26	0.103	1660	0.983	0.897	16270	0.988
CPT1C	-4.18	8	-1.26	0.103	1661	0.983	0.897	16269	0.988
EIF2S3	-4.18	8	-1.26	0.103	1662	0.983	0.897	16268	0.988
PRKCZ	-4.18	8	-1.26	0.103	1663	0.983	0.897	16267	0.988
NUP50	-4.18	8	-1.26	0.103	1664	0.983	0.897	16266	0.988
TES	-4.18	8	-1.26	0.103	1665	0.983	0.897	16265	0.988
MAGEE2	-4.18	8	-1.26	0.103	1666	0.983	0.897	16264	0.988
PACRG	-4.18	8	-1.26	0.103	1667	0.983	0.897	16263	0.988
ZBBX	-4.17	8	-1.26	0.103	1668	0.983	0.897	16262	0.988
WISP1	-4.17	8	-1.26	0.104	1669	0.983	0.896	16261	0.988
KCNE1	-4.17	8	-1.26	0.104	1670	0.983	0.896	16260	0.988
PHF5A	-3.61	6	-1.26	0.104	1671	0.983	0.896	16259	0.988
SF1	-4.17	8	-1.26	0.104	1672	0.983	0.896	16258	0.988
NUDT1	-4.17	8	-1.26	0.104	1673	0.983	0.896	16257	0.988
FOXM1	-4.17	8	-1.26	0.104	1674	0.983	0.896	16256	0.988
MFHAS1	-4.17	8	-1.26	0.104	1675	0.983	0.896	16255	0.988
SPHK2	-4.16	8	-1.26	0.104	1676	0.983	0.896	16254	0.988
TBL1XR1	-4.16	8	-1.26	0.104	1677	0.983	0.896	16253	0.988
TNFSF15	-4.16	8	-1.26	0.104	1678	0.983	0.896	16252	0.988
FAM132B	-4.16	8	-1.26	0.104	1679	0.983	0.896	16251	0.988
SLC16A1	-4.16	8	-1.26	0.104	1680	0.983	0.896	16250	0.988
GORAB	-4.16	8	-1.26	0.104	1681	0.983	0.896	16249	0.988
KRT6A	-2.94	4	-1.26	0.104	1682	0.983	0.896	16248	0.988
LSMEM2	-4.16	8	-1.26	0.105	1683	0.983	0.895	16247	0.988
EFCAB7	-4.16	8	-1.26	0.105	1684	0.983	0.895	16246	0.988
C9orf116	-4.15	8	-1.25	0.105	1685	0.983	0.895	16245	0.988
ECHDC2	-4.15	8	-1.25	0.105	1686	0.983	0.895	16244	0.988
TEX10	-4.15	8	-1.25	0.105	1687	0.983	0.895	16243	0.988
CSF1	-4.15	8	-1.25	0.105	1688	0.983	0.895	16242	0.988
IDH3A	-4.15	8	-1.25	0.105	1689	0.983	0.895	16241	0.988
MOSPD1	-4.15	8	-1.25	0.105	1690	0.983	0.895	16240	0.988
DIAPH2	-4.15	8	-1.25	0.105	1691	0.983	0.895	16239	0.988
CHRDL1	-4.15	8	-1.25	0.105	1692	0.983	0.895	16238	0.988
PCGF5	-4.15	8	-1.25	0.105	1693	0.983	0.895	16237	0.988
GABRD	-4.15	8	-1.25	0.105	1694	0.983	0.895	16236	0.988
FAM69C	-4.15	8	-1.25	0.105	1695	0.983	0.895	16235	0.988
DNAAF3	-4.15	8	-1.25	0.105	1696	0.983	0.895	16234	0.988
SP5	-4.14	8	-1.25	0.105	1697	0.983	0.895	16233	0.988
ANKRD28	-4.14	8	-1.25	0.105	1698	0.983	0.895	16232	0.988
SLC26A2	-4.14	8	-1.25	0.105	1699	0.983	0.895	16231	0.988
C17orf96	-4.14	8	-1.25	0.105	1700	0.983	0.895	16230	0.988
CFB	-4.14	8	-1.25	0.105	1701	0.983	0.895	16229	0.988
LRRC36	-4.14	8	-1.25	0.105	1702	0.983	0.895	16228	0.988
SMC3	-4.14	8	-1.25	0.106	1703	0.983	0.894	16227	0.988
RUNX2	-4.14	8	-1.25	0.106	1704	0.983	0.894	16226	0.988
UBA5	-4.14	8	-1.25	0.106	1705	0.983	0.894	16225	0.988
CNN3	-4.14	8	-1.25	0.106	1706	0.983	0.894	16224	0.988
METTL9	-4.14	8	-1.25	0.106	1707	0.983	0.894	16223	0.988
ZMAT1	-4.13	8	-1.25	0.106	1708	0.983	0.894	16222	0.988
HMOX2	-4.13	8	-1.25	0.106	1709	0.983	0.894	16221	0.988
NOP10	-4.13	8	-1.25	0.106	1710	0.983	0.894	16220	0.988
MTSS1	-4.13	8	-1.25	0.106	1711	0.983	0.894	16219	0.988
CYP7A1	-4.13	8	-1.25	0.106	1712	0.983	0.894	16218	0.988
SRF	-4.13	8	-1.25	0.106	1713	0.983	0.894	16217	0.988
PLA1A	-4.12	8	-1.25	0.106	1714	0.983	0.894	16216	0.988
EPHA10	-4.12	8	-1.25	0.106	1715	0.983	0.894	16215	0.988
SDE2	-4.12	8	-1.25	0.106	1716	0.983	0.894	16214	0.988
MRPL54	-4.12	8	-1.25	0.107	1717	0.983	0.893	16213	0.988
GUK1	-4.12	8	-1.24	0.107	1718	0.983	0.893	16212	0.988
HHAT	-4.12	8	-1.24	0.107	1719	0.983	0.893	16211	0.988
ABTB1	-4.12	8	-1.24	0.107	1720	0.983	0.893	16210	0.988
CAPN7	-4.12	8	-1.24	0.107	1721	0.983	0.893	16209	0.988
PLEKHB2	-4.12	8	-1.24	0.107	1722	0.983	0.893	16208	0.988
GEM	-4.12	8	-1.24	0.107	1723	0.983	0.893	16207	0.988
ARHGAP36	-4.11	8	-1.24	0.107	1724	0.983	0.893	16206	0.988
RNF183	-4.11	8	-1.24	0.107	1725	0.983	0.893	16205	0.988
NEXN	-4.11	8	-1.24	0.107	1726	0.983	0.893	16204	0.988
SH3BGRL3	-3.56	6	-1.24	0.107	1727	0.983	0.893	16203	0.988
SLC9A6	-4.1	8	-1.24	0.108	1728	0.983	0.892	16202	0.988
ZP2	-4.1	8	-1.24	0.108	1729	0.983	0.892	16201	0.988
PPIP5K1	-4.1	8	-1.24	0.108	1730	0.983	0.892	16200	0.988
SHANK2	-4.1	8	-1.24	0.108	1731	0.983	0.892	16199	0.988
GATAD2A	-4.1	8	-1.24	0.108	1732	0.983	0.892	16198	0.988
FAM133B	-2.05	2	-1.24	0.108	1733	0.983	0.892	16197	0.988
LIN7B	-4.1	8	-1.24	0.108	1734	0.983	0.892	16196	0.988
BFAR	-4.1	8	-1.24	0.108	1735	0.983	0.892	16195	0.988
CABP1	-3.55	6	-1.24	0.108	1736	0.983	0.892	16194	0.988
SLC12A4	-4.1	8	-1.24	0.108	1737	0.983	0.892	16193	0.988
GLYCTK	-4.1	8	-1.24	0.108	1738	0.983	0.892	16192	0.988
PLBD2	-4.09	8	-1.24	0.108	1739	0.983	0.892	16191	0.987
LANCL1	-4.09	8	-1.24	0.108	1740	0.983	0.892	16190	0.987
ZHX3	-4.09	8	-1.23	0.108	1741	0.983	0.892	16189	0.987
CALML5	-4.09	8	-1.23	0.108	1742	0.983	0.892	16188	0.987
NDUFS2	-4.09	8	-1.23	0.108	1743	0.983	0.892	16187	0.987
HYAL1	-4.09	8	-1.23	0.109	1744	0.983	0.891	16186	0.987
RAP1A	-4.09	8	-1.23	0.109	1745	0.983	0.891	16185	0.987
MOV10	-4.09	8	-1.23	0.109	1746	0.983	0.891	16184	0.987
CDCP1	-4.09	8	-1.23	0.109	1747	0.983	0.891	16183	0.987
DEFB113	-4.09	8	-1.23	0.109	1748	0.983	0.891	16182	0.987
CYP4Z1	-4.09	8	-1.23	0.109	1749	0.983	0.891	16181	0.987
HS6ST1	-4.08	8	-1.23	0.109	1750	0.983	0.891	16180	0.987
TSPYL6	-4.08	8	-1.23	0.109	1751	0.983	0.891	16179	0.987
PDHX	-4.08	8	-1.23	0.109	1752	0.983	0.891	16178	0.987
RAB14	-4.08	8	-1.23	0.109	1753	0.983	0.891	16177	0.987
COMMD3	-4.08	8	-1.23	0.109	1754	0.983	0.891	16176	0.987
WFDC11	-3.53	6	-1.23	0.109	1755	0.983	0.891	16175	0.987
EXPH5	-4.08	8	-1.23	0.109	1756	0.983	0.891	16174	0.987
NOL12	-4.08	8	-1.23	0.109	1757	0.983	0.891	16173	0.987
ATG7	-4.08	8	-1.23	0.109	1758	0.983	0.891	16172	0.987
ITGB4	-4.08	8	-1.23	0.109	1759	0.983	0.891	16171	0.987
NOL7	-4.08	8	-1.23	0.109	1760	0.983	0.891	16170	0.987
C6orf222	-4.08	8	-1.23	0.109	1761	0.983	0.891	16169	0.987
SPACA4	-4.08	8	-1.23	0.109	1762	0.983	0.891	16168	0.987
C20orf62	-4.08	8	-1.23	0.109	1763	0.983	0.891	16167	0.987
TMCC1	-4.08	8	-1.23	0.109	1764	0.983	0.891	16166	0.987
AKAP12	-4.07	8	-1.23	0.109	1765	0.983	0.891	16165	0.987
CHAMP1	-4.07	8	-1.23	0.11	1766	0.983	0.89	16164	0.987
EIF3F	-4.07	8	-1.23	0.11	1767	0.983	0.89	16163	0.987
CHUK	-4.07	8	-1.23	0.11	1768	0.983	0.89	16162	0.987
KCNIP2	-4.07	8	-1.23	0.11	1769	0.983	0.89	16161	0.987
HNMT	-4.07	8	-1.23	0.11	1770	0.983	0.89	16160	0.987
WDR72	-4.07	8	-1.23	0.11	1771	0.983	0.89	16159	0.987
NXNL1	-4.07	8	-1.23	0.11	1772	0.983	0.89	16158	0.987
EIF3M	-4.07	8	-1.23	0.11	1773	0.983	0.89	16157	0.987
TTC21A	-4.07	8	-1.23	0.11	1774	0.983	0.89	16156	0.987
NIPBL	-4.06	8	-1.23	0.11	1775	0.983	0.89	16155	0.987
LARS	-4.06	8	-1.23	0.11	1776	0.983	0.89	16154	0.987
ACBD3	-4.06	8	-1.23	0.11	1777	0.983	0.89	16153	0.987
DDX20	-4.06	8	-1.22	0.11	1778	0.983	0.89	16152	0.987
ANO6	-4.05	8	-1.22	0.111	1779	0.983	0.889	16151	0.987
NRCAM	-4.05	8	-1.22	0.111	1780	0.983	0.889	16150	0.987
NIT1	-4.05	8	-1.22	0.111	1781	0.983	0.889	16149	0.987
TIMM50	-4.05	8	-1.22	0.111	1782	0.983	0.889	16148	0.987
SLC30A1	-4.05	8	-1.22	0.111	1783	0.983	0.889	16147	0.987
VANGL1	-4.05	8	-1.22	0.111	1784	0.983	0.889	16146	0.987
ANGPTL5	-4.05	8	-1.22	0.111	1785	0.983	0.889	16145	0.987
KMT2E	-4.05	8	-1.22	0.111	1786	0.983	0.889	16144	0.987
KAT2A	-4.05	8	-1.22	0.111	1787	0.983	0.889	16143	0.987
MRPL47	-4.05	8	-1.22	0.111	1788	0.983	0.889	16142	0.987
TMPRSS4	-4.04	8	-1.22	0.111	1789	0.983	0.889	16141	0.987
EFNA2	-4.04	8	-1.22	0.111	1790	0.983	0.889	16140	0.987
FUCA1	-4.04	8	-1.22	0.111	1791	0.983	0.889	16139	0.987
FPR3	-4.04	8	-1.22	0.111	1792	0.983	0.889	16138	0.987
INO80D	-4.04	8	-1.22	0.112	1793	0.983	0.888	16137	0.987
PSMD6	-4.04	8	-1.22	0.112	1794	0.983	0.888	16136	0.987
PLAA	-4.03	8	-1.22	0.112	1795	0.983	0.888	16135	0.987
SKOR2	-4.03	8	-1.22	0.112	1796	0.983	0.888	16134	0.987
RAD51AP1	-4.03	8	-1.22	0.112	1797	0.983	0.888	16133	0.987
CD300E	-2.85	4	-1.22	0.112	1798	0.983	0.888	16132	0.987
IL1RAPL1	-4.03	8	-1.21	0.112	1799	0.983	0.888	16131	0.987
LIM2	-4.03	8	-1.21	0.112	1800	0.983	0.888	16130	0.987
FBXL4	-4.03	8	-1.21	0.112	1801	0.983	0.888	16129	0.987
BMP5	-4.03	8	-1.21	0.112	1802	0.983	0.888	16128	0.987
CLPX	-4.03	8	-1.21	0.112	1803	0.983	0.888	16127	0.987
CDK14	-4.02	8	-1.21	0.112	1804	0.983	0.888	16126	0.987
NDUFAF5	-4.02	8	-1.21	0.113	1805	0.983	0.887	16125	0.987
RASAL2	-4.02	8	-1.21	0.113	1806	0.983	0.887	16124	0.987
PCNXL3	-4.02	8	-1.21	0.113	1807	0.983	0.887	16123	0.987
PPP1R3F	-4.02	8	-1.21	0.113	1808	0.983	0.887	16122	0.987
SIX4	-4.02	8	-1.21	0.113	1809	0.983	0.887	16121	0.987
THAP6	-4.02	8	-1.21	0.113	1810	0.983	0.887	16120	0.987
GIN1	-4.02	8	-1.21	0.113	1811	0.983	0.887	16119	0.987
BLOC1S2	-4.02	8	-1.21	0.113	1812	0.983	0.887	16118	0.987
SEPHS1	-4.01	8	-1.21	0.113	1813	0.983	0.887	16117	0.986
GPC5	-4.01	8	-1.21	0.113	1814	0.983	0.887	16116	0.986
DPCD	-4.01	8	-1.21	0.113	1815	0.983	0.887	16115	0.986
CDH4	-4.01	8	-1.21	0.113	1816	0.983	0.887	16114	0.986
CUX2	-4.01	8	-1.21	0.113	1817	0.983	0.887	16113	0.986
MAPK1	-4.01	8	-1.21	0.114	1818	0.983	0.886	16112	0.986
BTBD18	-4	8	-1.21	0.114	1819	0.983	0.886	16111	0.986
GTPBP8	-4	8	-1.21	0.114	1820	0.983	0.886	16110	0.986
LARP6	-4	8	-1.21	0.114	1821	0.983	0.886	16109	0.986
C1orf52	-4	8	-1.21	0.114	1822	0.983	0.886	16108	0.986
TMEM19	-4	8	-1.21	0.114	1823	0.983	0.886	16107	0.986
HELB	-4	8	-1.21	0.114	1824	0.983	0.886	16106	0.986
TALDO1	-4	8	-1.21	0.114	1825	0.983	0.886	16105	0.986
TMPRSS11A	-4	8	-1.21	0.114	1826	0.983	0.886	16104	0.986
CTDP1	-4	8	-1.2	0.114	1827	0.983	0.886	16103	0.986
TGFBR2	-4	8	-1.2	0.114	1828	0.983	0.886	16102	0.986
MAGI3	-4	8	-1.2	0.114	1829	0.983	0.886	16101	0.986
LRRC46	-4	8	-1.2	0.114	1830	0.983	0.886	16100	0.986
CDH23	-3.99	8	-1.2	0.114	1831	0.983	0.886	16099	0.986
TPM1	-3.99	8	-1.2	0.114	1832	0.983	0.886	16098	0.986
APLP2	-3.99	8	-1.2	0.114	1833	0.983	0.886	16097	0.986
GUCA2A	-3.99	8	-1.2	0.115	1834	0.983	0.885	16096	0.986
GSDMA	-3.99	8	-1.2	0.115	1835	0.983	0.885	16095	0.986
BRD7	-3.99	8	-1.2	0.115	1836	0.983	0.885	16094	0.986
ZNF385B	-3.98	8	-1.2	0.115	1837	0.983	0.885	16093	0.986
CLDN11	-3.98	8	-1.2	0.115	1838	0.983	0.885	16092	0.986
TAF6	-3.98	8	-1.2	0.115	1839	0.983	0.885	16091	0.986
NAPA	-3.98	8	-1.2	0.115	1840	0.983	0.885	16090	0.986
NDUFB5	-3.98	8	-1.2	0.115	1841	0.983	0.885	16089	0.986
ACSF3	-3.98	8	-1.2	0.115	1842	0.983	0.885	16088	0.986
2021-03-09	-3.98	8	-1.2	0.115	1843	0.983	0.885	16087	0.986
CAPZA1	-3.97	8	-1.2	0.116	1844	0.983	0.884	16086	0.986
GLB1	-3.97	8	-1.2	0.116	1845	0.983	0.884	16085	0.986
RPF2	-3.97	8	-1.2	0.116	1846	0.983	0.884	16084	0.986
DUSP2	-3.97	8	-1.2	0.116	1847	0.983	0.884	16083	0.986
EIF2S2	-2.8	4	-1.19	0.116	1848	0.983	0.884	16082	0.985
CUBN	-3.97	8	-1.19	0.116	1849	0.983	0.884	16081	0.985
KRT72	-3.96	8	-1.19	0.116	1850	0.983	0.884	16080	0.985
MOS	-3.96	8	-1.19	0.116	1851	0.983	0.884	16079	0.985
ETV2	-3.96	8	-1.19	0.116	1852	0.983	0.884	16078	0.985
DLL4	-3.96	8	-1.19	0.116	1853	0.983	0.884	16077	0.985
PEX12	-3.96	8	-1.19	0.116	1854	0.983	0.884	16076	0.985
TEX9	-3.96	8	-1.19	0.116	1855	0.983	0.884	16075	0.985
CRKL	-3.96	8	-1.19	0.116	1856	0.983	0.884	16074	0.985
SAMD10	-3.96	8	-1.19	0.116	1857	0.983	0.884	16073	0.985
ULBP3	-3.96	8	-1.19	0.117	1858	0.983	0.883	16072	0.985
SCAF1	-3.96	8	-1.19	0.117	1859	0.983	0.883	16071	0.985
CAPN9	-3.96	8	-1.19	0.117	1860	0.983	0.883	16070	0.985
ACADM	-3.96	8	-1.19	0.117	1861	0.983	0.883	16069	0.985
KPNA1	-3.96	8	-1.19	0.117	1862	0.983	0.883	16068	0.985
RNLS	-3.95	8	-1.19	0.117	1863	0.983	0.883	16067	0.985
CDC14A	-3.95	8	-1.19	0.117	1864	0.983	0.883	16066	0.985
NFS1	-3.95	8	-1.19	0.117	1865	0.983	0.883	16065	0.985
CLDND1	-3.95	8	-1.19	0.117	1866	0.983	0.883	16064	0.985
FAM73A	-3.95	8	-1.19	0.117	1867	0.983	0.883	16063	0.985
RNF113A	-3.95	8	-1.19	0.117	1868	0.983	0.883	16062	0.985
KCNS2	-3.95	8	-1.19	0.117	1869	0.983	0.883	16061	0.985
SEMA4A	-3.95	8	-1.19	0.117	1870	0.983	0.883	16060	0.985
SHFM1	-3.95	8	-1.19	0.117	1871	0.983	0.883	16059	0.985
GTF2E2	-3.94	8	-1.19	0.117	1872	0.983	0.883	16058	0.985
MTNR1A	-3.94	8	-1.19	0.117	1873	0.983	0.883	16057	0.985
SLIT1	-3.94	8	-1.19	0.117	1874	0.983	0.883	16056	0.985
CRELD2	-3.94	8	-1.19	0.118	1875	0.983	0.882	16055	0.985
HOXA6	-3.94	8	-1.19	0.118	1876	0.983	0.882	16054	0.985
ZNRF3	-3.94	8	-1.19	0.118	1877	0.983	0.882	16053	0.985
ZNF706	-3.94	8	-1.19	0.118	1878	0.983	0.882	16052	0.985
WRAP73	-3.41	6	-1.19	0.118	1879	0.983	0.882	16051	0.985
APOLD1	-3.93	8	-1.18	0.118	1880	0.983	0.882	16050	0.985
CYBRD1	-3.93	8	-1.18	0.118	1881	0.983	0.882	16049	0.985
IGSF11	-3.93	8	-1.18	0.118	1882	0.983	0.882	16048	0.985
FABP2	-3.93	8	-1.18	0.118	1883	0.983	0.882	16047	0.985
KDM5B	-3.93	8	-1.18	0.118	1884	0.983	0.882	16046	0.985
ST5	-3.93	8	-1.18	0.118	1885	0.983	0.882	16045	0.985
FGFBP1	-3.93	8	-1.18	0.118	1886	0.983	0.882	16044	0.985
TBX19	-3.93	8	-1.18	0.118	1887	0.983	0.882	16043	0.985
PFDN5	-3.93	8	-1.18	0.118	1888	0.983	0.882	16042	0.985
NECAP2	-3.93	8	-1.18	0.118	1889	0.983	0.882	16041	0.985
PSMG2	-3.93	8	-1.18	0.119	1890	0.983	0.881	16040	0.985
HAND2	-3.92	8	-1.18	0.119	1891	0.983	0.881	16039	0.985
MBL2	-3.92	8	-1.18	0.119	1892	0.983	0.881	16038	0.985
CA7	-3.92	8	-1.18	0.119	1893	0.983	0.881	16037	0.985
PIK3CA	-3.92	8	-1.18	0.119	1894	0.983	0.881	16036	0.985
PPIL2	-3.92	8	-1.18	0.119	1895	0.983	0.881	16035	0.985
SHQ1	-3.92	8	-1.18	0.119	1896	0.983	0.881	16034	0.985
SLC5A1	-3.92	8	-1.18	0.119	1897	0.983	0.881	16033	0.985
BAI2	-3.92	8	-1.18	0.119	1898	0.983	0.881	16032	0.985
ENO2	-3.92	8	-1.18	0.119	1899	0.983	0.881	16031	0.985
PCSK9	-3.92	8	-1.18	0.119	1900	0.983	0.881	16030	0.985
PLXNB2	-3.91	8	-1.18	0.119	1901	0.983	0.881	16029	0.985
APOA1BP	-3.91	8	-1.18	0.119	1902	0.983	0.881	16028	0.985
TMEM92	-3.91	8	-1.18	0.119	1903	0.983	0.881	16027	0.985
TRIM62	-3.91	8	-1.18	0.119	1904	0.983	0.881	16026	0.985
KCNMB3	-3.91	8	-1.18	0.119	1905	0.983	0.881	16025	0.985
ACE	-3.91	8	-1.18	0.119	1906	0.983	0.881	16024	0.985
KCNJ3	-3.91	8	-1.18	0.12	1907	0.983	0.88	16023	0.985
C15orf60	-3.91	8	-1.18	0.12	1908	0.983	0.88	16022	0.985
TC2N	-3.91	8	-1.18	0.12	1909	0.983	0.88	16021	0.985
SULT1A2	-3.9	8	-1.18	0.12	1910	0.983	0.88	16020	0.985
KIF1B	-3.9	8	-1.17	0.12	1911	0.983	0.88	16019	0.985
CDC5L	-3.9	8	-1.17	0.12	1912	0.983	0.88	16018	0.985
C11orf74	-2.76	4	-1.17	0.12	1913	0.983	0.88	16017	0.985
METTL10	-3.9	8	-1.17	0.12	1914	0.983	0.88	16016	0.985
GLRX2	-3.9	8	-1.17	0.12	1915	0.983	0.88	16015	0.985
TRPA1	-3.9	8	-1.17	0.12	1916	0.983	0.88	16014	0.985
NSF	-3.9	8	-1.17	0.12	1917	0.983	0.88	16013	0.985
SPATA20	-3.9	8	-1.17	0.12	1918	0.983	0.88	16012	0.985
SETD8	-3.9	8	-1.17	0.12	1919	0.983	0.88	16011	0.985
SH3BP5L	-3.9	8	-1.17	0.121	1920	0.983	0.879	16010	0.985
KCTD3	-3.9	8	-1.17	0.121	1921	0.983	0.879	16009	0.985
CES5A	-3.89	8	-1.17	0.121	1922	0.983	0.879	16008	0.985
NRF1	-3.89	8	-1.17	0.121	1923	0.983	0.879	16007	0.985
LRRC69	-3.89	8	-1.17	0.121	1924	0.983	0.879	16006	0.985
UPF1	-3.37	6	-1.17	0.121	1925	0.983	0.879	16005	0.985
SERHL2	-3.89	8	-1.17	0.121	1926	0.983	0.879	16004	0.985
MSH2	-3.89	8	-1.17	0.121	1927	0.983	0.879	16003	0.985
ZNF691	-3.89	8	-1.17	0.121	1928	0.983	0.879	16002	0.985
MED18	-3.89	8	-1.17	0.121	1929	0.983	0.879	16001	0.985
NDUFB10	-3.89	8	-1.17	0.121	1930	0.983	0.879	16000	0.985
USP54	-3.89	8	-1.17	0.121	1931	0.983	0.879	15999	0.985
CNOT11	-3.88	8	-1.17	0.121	1932	0.983	0.879	15998	0.985
PCYOX1	-3.88	8	-1.17	0.121	1933	0.983	0.879	15997	0.985
ZNF41	-3.88	8	-1.17	0.121	1934	0.983	0.879	15996	0.985
FGFRL1	-3.88	8	-1.17	0.121	1935	0.983	0.879	15995	0.985
C11orf68	-3.88	8	-1.17	0.121	1936	0.983	0.879	15994	0.985
ANXA1	-3.88	8	-1.17	0.121	1937	0.983	0.879	15993	0.985
MED25	-3.88	8	-1.17	0.122	1938	0.983	0.878	15992	0.985
COQ10A	-3.36	6	-1.17	0.122	1939	0.983	0.878	15991	0.985
TBRG4	-3.88	8	-1.17	0.122	1940	0.983	0.878	15990	0.985
SIX2	-3.87	8	-1.17	0.122	1941	0.983	0.878	15989	0.985
FAM89A	-3.87	8	-1.17	0.122	1942	0.983	0.878	15988	0.985
MMEL1	-3.87	8	-1.17	0.122	1943	0.983	0.878	15987	0.985
LMCD1	-3.87	8	-1.17	0.122	1944	0.983	0.878	15986	0.985
IFNLR1	-3.87	8	-1.17	0.122	1945	0.983	0.878	15985	0.985
ZNF394	-3.87	8	-1.16	0.122	1946	0.983	0.878	15984	0.985
RANGAP1	-3.87	8	-1.16	0.122	1947	0.983	0.878	15983	0.985
AFF4	-3.87	8	-1.16	0.122	1948	0.983	0.878	15982	0.985
NPL	-3.87	8	-1.16	0.122	1949	0.983	0.878	15981	0.985
ALG14	-3.87	8	-1.16	0.122	1950	0.983	0.878	15980	0.985
POLR2H	-3.87	8	-1.16	0.122	1951	0.983	0.878	15979	0.985
TPD52L2	-3.87	8	-1.16	0.122	1952	0.983	0.878	15978	0.985
C1QTNF8	-3.87	8	-1.16	0.122	1953	0.983	0.878	15977	0.985
CCNJ	-3.87	8	-1.16	0.122	1954	0.983	0.878	15976	0.985
C5orf63	-3.87	8	-1.16	0.122	1955	0.983	0.878	15975	0.985
SEC22C	-3.86	8	-1.16	0.123	1956	0.983	0.877	15974	0.985
OR2AG2	-3.86	8	-1.16	0.123	1957	0.983	0.877	15973	0.985
MYRF	-3.86	8	-1.16	0.123	1958	0.983	0.877	15972	0.985
LATS1	-3.86	8	-1.16	0.123	1959	0.983	0.877	15971	0.985
MYO1F	-3.86	8	-1.16	0.123	1960	0.983	0.877	15970	0.985
C19orf80	-3.86	8	-1.16	0.123	1961	0.983	0.877	15969	0.985
PGAM5	-3.86	8	-1.16	0.123	1962	0.983	0.877	15968	0.985
TBCC	-3.86	8	-1.16	0.123	1963	0.983	0.877	15967	0.985
CHTF8	-3.86	8	-1.16	0.123	1964	0.983	0.877	15966	0.985
PRSS46	-3.86	8	-1.16	0.123	1965	0.983	0.877	15965	0.985
MAGEF1	-3.86	8	-1.16	0.123	1966	0.983	0.877	15964	0.985
KIF14	-3.86	8	-1.16	0.123	1967	0.983	0.877	15963	0.985
ADNP2	-3.85	8	-1.16	0.123	1968	0.983	0.877	15962	0.985
LSM14B	-3.85	8	-1.16	0.123	1969	0.983	0.877	15961	0.985
KLF4	-3.85	8	-1.16	0.123	1970	0.983	0.877	15960	0.985
CYP11B2	-3.85	8	-1.16	0.124	1971	0.983	0.876	15959	0.985
TUT1	-3.85	8	-1.16	0.124	1972	0.983	0.876	15958	0.985
ETV6	-3.85	8	-1.16	0.124	1973	0.983	0.876	15957	0.985
IL17A	-3.85	8	-1.16	0.124	1974	0.983	0.876	15956	0.985
C2CD4D	-3.85	8	-1.16	0.124	1975	0.983	0.876	15955	0.985
CRIP1	-3.84	8	-1.16	0.124	1976	0.983	0.876	15954	0.985
PRPF4B	-3.84	8	-1.16	0.124	1977	0.983	0.876	15953	0.985
AKR1A1	-3.84	8	-1.16	0.124	1978	0.983	0.876	15952	0.985
ARHGEF17	-3.84	8	-1.15	0.124	1979	0.983	0.876	15951	0.984
REG4	-3.84	8	-1.15	0.124	1980	0.983	0.876	15950	0.984
WDR11	-3.84	8	-1.15	0.124	1981	0.983	0.876	15949	0.984
KCNA2	-3.83	8	-1.15	0.125	1982	0.983	0.875	15948	0.984
NUAK1	-3.83	8	-1.15	0.125	1983	0.983	0.875	15947	0.984
CD200R1	-3.83	8	-1.15	0.125	1984	0.983	0.875	15946	0.984
SLC15A4	-3.83	8	-1.15	0.125	1985	0.983	0.875	15945	0.984
EMILIN3	-3.83	8	-1.15	0.125	1986	0.983	0.875	15944	0.984
KIR3DL1	-3.83	8	-1.15	0.125	1987	0.983	0.875	15943	0.984
ING1	-3.83	8	-1.15	0.125	1988	0.983	0.875	15942	0.984
GPR62	-3.83	8	-1.15	0.125	1989	0.983	0.875	15941	0.984
SLC13A4	-3.83	8	-1.15	0.125	1990	0.983	0.875	15940	0.984
ACTRT3	-3.83	8	-1.15	0.125	1991	0.983	0.875	15939	0.984
PPIF	-3.83	8	-1.15	0.125	1992	0.983	0.875	15938	0.984
SMPD3	-3.82	8	-1.15	0.125	1993	0.983	0.875	15937	0.984
XRCC5	-3.82	8	-1.15	0.125	1994	0.983	0.875	15936	0.984
ANXA7	-3.82	8	-1.15	0.125	1995	0.983	0.875	15935	0.984
PIWIL1	-3.82	8	-1.15	0.125	1996	0.983	0.875	15934	0.984
DSC3	-3.82	8	-1.15	0.126	1997	0.983	0.874	15933	0.984
ZBTB25	-3.82	8	-1.15	0.126	1998	0.983	0.874	15932	0.984
CMPK1	-3.82	8	-1.15	0.126	1999	0.983	0.874	15931	0.984
[truncated: 15,930 more rows]

## Sheet: Supplementary File 1c
GENE	sumZ	numObs	normZ	pval_synth	rank_synth	fdr_synth	pval_supp	rank_supp	fdr_supp
PARP1	-56.14	8	-16.07	1.98e-58	1	3.54e-54	1	17930	1
EIF2S1	-34.54	8	-9.87	2.84e-23	2	2.55e-19	1	17929	1
DDX3X	-31.3	8	-8.94	1.99e-19	3	1.19e-15	1	17928	1
RPSA	-30.08	8	-8.59	4.47e-18	4	2e-14	1	17927	1
RPS5	-29.23	8	-8.35	3.56e-17	5	1.28e-13	1	17926	1
RPL8	-28.05	8	-8.01	5.95e-16	6	1.78e-12	1	17925	1
LRR1	-27.88	8	-7.96	8.91e-16	7	2.28e-12	1	17924	1
RPS11	-27.2	8	-7.76	4.21e-15	8	9.44e-12	1	17923	1
RPL14	-26.67	8	-7.61	1.38e-14	9	2.75e-11	1	17922	1
EIF3A	-26.12	8	-7.45	4.62e-14	10	7.56e-11	1	17921	1
EIF3G	-26.12	8	-7.45	4.64e-14	11	7.56e-11	1	17920	1
RPL13A	-17.72	4	-7.15	4.46e-13	12	6.66e-10	1	17919	1
RPL27A	-23.79	8	-6.78	5.88e-12	13	8.11e-09	1	17918	1
RPL12	-23.76	8	-6.77	6.36e-12	14	8.14e-09	1	17917	1
EIF3D	-23.48	8	-6.69	1.09e-11	15	1.31e-08	1	17916	1
GRPEL1	-22.79	8	-6.49	4.16e-11	16	4.66e-08	1	17915	1
EIF3I	-22.21	8	-6.33	1.24e-10	17	1.3e-07	1	17914	1
RPL18A	-18.76	6	-6.17	3.38e-10	18	3.36e-07	1	17913	1
ABCE1	-21.64	8	-6.16	3.56e-10	19	3.36e-07	1	17912	1
EIF3B	-21.18	8	-6.03	8.09e-10	20	7.26e-07	1	17911	1
RPS15A	-14.95	4	-6.02	8.56e-10	21	7.31e-07	1	17910	1
VARS	-21.12	8	-6.01	9e-10	22	7.33e-07	1	17909	1
EIF3E	-20.98	8	-5.97	1.15e-09	23	8.98e-07	1	17908	1
HSPA9	-20.59	8	-5.86	2.26e-09	24	1.69e-06	1	17907	1
PYCR2	-20.49	8	-5.83	2.72e-09	25	1.95e-06	1	17906	1
ETF1	-20.3	8	-5.78	3.74e-09	26	2.58e-06	1	17905	1
RPL38	-20.24	8	-5.76	4.18e-09	27	2.78e-06	1	17904	1
UBA52	-17.12	6	-5.63	9.2e-09	28	5.89e-06	1	17903	1
CDK9	-19.6	8	-5.58	1.21e-08	29	7.5e-06	1	17902	1
RPL30	-13.81	4	-5.56	1.36e-08	30	8.12e-06	1	17901	1
RPL10A	-16.84	6	-5.54	1.55e-08	31	8.98e-06	1	17900	1
RPS2	-19.42	8	-5.53	1.64e-08	32	9.19e-06	1	17899	1
RPL31	-13.46	4	-5.42	3.01e-08	33	1.64e-05	1	17898	1
RPS16	-18.75	8	-5.33	4.8e-08	34	2.53e-05	1	17897	1
HSPA5	-18.52	8	-5.27	6.84e-08	35	3.5e-05	1	17896	1
EIF2B5	-17.96	8	-5.11	1.62e-07	36	8.08e-05	1	17895	1
RPS14	-17.91	8	-5.09	1.76e-07	37	8.52e-05	1	17894	1
RPS18	-12.65	4	-5.09	1.81e-07	38	8.55e-05	1	17893	1
RPS13	-17.6	8	-5	2.82e-07	39	0.00013	1	17892	1
RPLP2	-14.99	6	-4.92	4.28e-07	40	0.000192	1	17891	1
POLA2	-16.99	8	-4.83	6.84e-07	41	0.000299	1	17890	1
RPLP0	-16.9	8	-4.8	7.79e-07	42	0.000333	1	17889	1
RPL36	-16.51	8	-4.69	1.36e-06	43	0.000568	1	17888	1
PRIM1	-16.45	8	-4.68	1.47e-06	44	0.000598	1	17887	1
DTL	-16.3	8	-4.63	1.82e-06	45	0.000724	1	17886	1
RPS8	-14.1	6	-4.63	1.86e-06	46	0.000725	1	17885	1
SP1	-16.09	8	-4.57	2.42e-06	47	0.000922	1	17884	1
TRAIP	-16.08	8	-4.57	2.47e-06	48	0.000924	1	17883	1
GARS	-15.92	8	-4.52	3.06e-06	49	0.00112	1	17882	1
RPL13	-12.56	5	-4.51	3.2e-06	50	0.00115	1	17881	1
RPS3	-15.65	8	-4.44	4.43e-06	51	0.00156	1	17880	1
EEF1A1	-13.47	6	-4.42	4.98e-06	52	0.00172	1	17879	1
BRD4	-15.53	8	-4.41	5.2e-06	53	0.00176	1	17878	1
AAMP	-15.45	8	-4.39	5.76e-06	54	0.00191	1	17877	1
RPL11	-15.42	8	-4.38	5.96e-06	55	0.00194	1	17876	1
PSMC6	-15.37	8	-4.36	6.39e-06	56	0.00205	1	17875	1
CDK1	-15.34	8	-4.36	6.62e-06	57	0.00208	1	17874	1
CSE1L	-15.29	8	-4.34	7.09e-06	58	0.00217	1	17873	1
RPL10	-13.24	6	-4.34	7.15e-06	59	0.00217	1	17872	1
SARS	-15.21	8	-4.32	7.84e-06	60	0.00234	1	17871	1
PRELID1	-15.18	8	-4.31	8.16e-06	61	0.00239	1	17870	1
IMP3	-15.17	8	-4.31	8.27e-06	62	0.00239	1	17869	1
GDF1	-15.11	8	-4.29	8.94e-06	63	0.00254	1	17868	1
RPL18	-15.02	8	-4.26	1e-05	64	0.00281	1	17867	1
RPL3	-14.81	8	-4.2	1.32e-05	65	0.00365	1	17866	1
C1orf95	-14.75	8	-4.18	1.43e-05	66	0.00387	1	17865	1
ALG11	-14.7	8	-4.17	1.52e-05	67	0.00408	1	17864	1
CDC7	-14.66	8	-4.16	1.6e-05	68	0.00422	1	17863	1
MTBP	-14.59	8	-4.14	1.73e-05	69	0.00447	1	17862	1
EIF4A1	-14.59	8	-4.14	1.75e-05	70	0.00447	1	17861	1
TIMM23	-14.54	8	-4.12	1.86e-05	71	0.00469	1	17860	1
RPS19	-12.54	6	-4.11	2e-05	72	0.00499	1	17859	1
RRP15	-14.42	8	-4.09	2.14e-05	73	0.00525	1	17858	1
SAP18	-14.39	8	-4.08	2.23e-05	74	0.00541	1	17857	1
CDCA8	-14.28	8	-4.05	2.55e-05	75	0.00609	1	17856	1
CDT1	-14.15	8	-4.01	3e-05	76	0.00707	1	17855	1
EIF3F	-14.11	8	-4	3.15e-05	77	0.00733	1	17854	1
RTEL1	-14.02	8	-3.98	3.49e-05	78	0.00803	1	17853	1
RPL35A	-12.12	6	-3.97	3.6e-05	79	0.00817	1	17852	1
NAMPT	-13.87	8	-3.93	4.2e-05	80	0.00942	1	17851	1
TICRR	-13.85	8	-3.93	4.3e-05	81	0.00952	1	17850	1
RPL37A	-9.75	4	-3.91	4.66e-05	82	0.0102	1	17849	1
ARF1	-13.76	8	-3.9	4.77e-05	83	0.0102	1	17848	1
RPL15	-6.88	2	-3.9	4.79e-05	84	0.0102	1	17847	1
NUS1	-13.75	8	-3.9	4.86e-05	85	0.0102	1	17846	1
DDX49	-13.57	8	-3.85	6.01e-05	86	0.0125	1	17845	1
PSMC2	-13.4	8	-3.8	7.25e-05	87	0.0149	1	17844	1
COPA	-13.36	8	-3.79	7.66e-05	88	0.0154	1	17843	1
MIXL1	-13.36	8	-3.79	7.67e-05	89	0.0154	1	17842	1
CDC6	-13.34	8	-3.78	7.83e-05	90	0.0155	1	17841	1
WDR46	-13.32	8	-3.78	7.97e-05	91	0.0155	1	17840	1
QARS	-13.32	8	-3.78	8e-05	92	0.0155	1	17839	1
SDAD1	-13.31	8	-3.77	8.06e-05	93	0.0155	1	17838	1
TAF3	-13.11	8	-3.72	0.000101	94	0.0193	1	17837	1
LONP1	-13.11	8	-3.71	0.000102	95	0.0193	1	17836	1
POLR2L	-13.1	8	-3.71	0.000103	96	0.0193	1	17835	1
SFPQ	-13.07	8	-3.7	0.000107	97	0.0197	1	17834	1
SRSF3	-13.02	8	-3.69	0.000113	98	0.0206	1	17833	1
TMEM63A	-12.92	8	-3.66	0.000126	99	0.0228	1	17832	1
CDC45	-12.91	8	-3.66	0.000127	100	0.0228	1	17831	1
DDX56	-12.77	8	-3.62	0.000149	101	0.0263	1	17830	1
DDX24	-12.77	8	-3.62	0.00015	102	0.0263	1	17829	1
RBBP5	-12.76	8	-3.61	0.000151	103	0.0264	1	17828	1
PSMC5	-12.71	8	-3.6	0.000159	104	0.0274	1	17827	1
ATP5A1	-12.63	8	-3.58	0.000173	105	0.0296	1	17826	1
KARS	-12.57	8	-3.56	0.000185	106	0.0313	1	17825	1
KIF11	-12.55	8	-3.55	0.000189	107	0.0317	1	17824	1
RPS23	-12.49	8	-3.54	0.000203	108	0.0336	1	17823	1
C1orf115	-12.48	8	-3.53	0.000204	109	0.0336	1	17822	1
CIRH1A	-12.38	8	-3.5	0.000229	110	0.0373	1	17821	1
UTP11L	-12.35	8	-3.5	0.000236	111	0.0381	1	17820	1
NOL7	-12.31	8	-3.49	0.000246	112	0.0394	1	17819	1
RRP9	-12.23	8	-3.46	0.000269	113	0.0427	1	17818	1
LIN9	-12.21	8	-3.46	0.000273	114	0.043	1	17817	1
RRN3	-12.15	8	-3.44	0.000292	115	0.0455	1	17816	1
EXO1	-12.1	8	-3.43	0.000307	116	0.0474	1	17815	1
RPL5	-8.55	4	-3.42	0.00031	117	0.0474	1	17814	1
EIF2B4	-12.09	8	-3.42	0.000312	118	0.0474	1	17813	1
GTPBP4	-12.08	8	-3.42	0.000316	119	0.0475	1	17812	1
C1orf65	-11.99	8	-3.39	0.000346	120	0.0515	1	17811	1
SDE2	-11.98	8	-3.39	0.000348	121	0.0515	1	17810	1
RAN	-11.89	8	-3.36	0.000383	122	0.0563	1	17809	1
KAT5	-11.86	8	-3.36	0.000395	123	0.0575	1	17808	1
FAM230A	-11.85	8	-3.35	0.000399	124	0.0577	1	17807	1
RPL35	-11.83	8	-3.35	0.000407	125	0.0583	1	17806	1
NOP14	-11.82	8	-3.34	0.000413	126	0.0588	1	17805	1
NUTF2	-11.78	8	-3.33	0.000432	127	0.061	1	17804	1
RUVBL1	-11.77	8	-3.33	0.000436	128	0.0611	1	17803	1
POLA1	-11.76	8	-3.33	0.00044	129	0.0611	1	17802	1
EEF2	-11.7	8	-3.31	0.000465	130	0.0642	1	17801	1
THOC2	-11.68	8	-3.3	0.000475	131	0.065	1	17800	1
EIF5B	-11.66	8	-3.3	0.000488	132	0.0662	1	17799	1
LRRC25	-11.61	8	-3.28	0.000514	133	0.0693	0.999	17798	1
FAU	-11.56	8	-3.27	0.000538	134	0.0719	0.999	17797	1
RPL23	-11.5	8	-3.25	0.000573	135	0.0762	0.999	17796	1
NOP58	-10.72	7	-3.24	0.000597	136	0.0787	0.999	17795	1
PES1	-11.44	8	-3.23	0.000609	137	0.0797	0.999	17794	1
YTHDF2	-11.39	8	-3.22	0.00064	138	0.0832	0.999	17793	1
RPL7A	-11.37	8	-3.21	0.000653	139	0.0843	0.999	17792	1
ITPKB	-11.35	8	-3.21	0.000665	140	0.0852	0.999	17791	1
RPLP1	-8	4	-3.2	0.00069	141	0.0878	0.999	17790	1
TIMELESS	-11.26	8	-3.18	0.000727	142	0.0918	0.999	17789	1
MYD88	-11.22	8	-3.17	0.000758	143	0.0947	0.999	17788	1
CNIH4	-11.21	8	-3.17	0.000763	144	0.0947	0.999	17787	1
TRRAP	-11.21	8	-3.17	0.000766	145	0.0947	0.999	17786	1
EIF4E	-11.2	8	-3.17	0.000771	146	0.0947	0.999	17785	1
SRP9	-11.15	8	-3.15	0.000811	147	0.099	0.999	17784	1
DHX37	-11.14	8	-3.15	0.000819	148	0.0991	0.999	17783	1
NGDN	-11.13	8	-3.15	0.000824	149	0.0991	0.999	17782	1
ALDOA	-11.12	8	-3.14	0.000837	150	0.1	0.999	17781	1
GNL3L	-11.09	8	-3.13	0.000859	151	0.102	0.999	17780	1
HEATR1	-11.09	8	-3.13	0.000861	152	0.102	0.999	17779	1
MCM10	-11.04	8	-3.12	0.000902	153	0.105	0.999	17778	1
IFFO1	-11.04	8	-3.12	0.000904	154	0.105	0.999	17777	1
BCOR	-10.95	8	-3.09	0.000991	155	0.114	0.999	17776	1
FBL	-10.94	8	-3.09	0.000998	156	0.114	0.999	17775	1
EIF2S3	-10.93	8	-3.09	0.001	157	0.114	0.999	17774	1
ANKLE2	-10.93	8	-3.09	0.00101	158	0.114	0.999	17773	1
EIF2B3	-10.9	8	-3.08	0.00104	159	0.117	0.999	17772	1
ISG20L2	-10.89	8	-3.08	0.00105	160	0.117	0.999	17771	1
UTP3	-10.88	8	-3.07	0.00105	161	0.117	0.999	17770	1
PHB2	-10.84	8	-3.06	0.00109	162	0.121	0.999	17769	1
EIF4A3	-10.84	8	-3.06	0.0011	163	0.121	0.999	17768	1
TAF11	-10.83	8	-3.06	0.0011	164	0.121	0.999	17767	1
FAM131C	-10.83	8	-3.06	0.00111	165	0.121	0.999	17766	1
TDG	-10.8	8	-3.05	0.00114	166	0.123	0.999	17765	1
PLK1	-10.72	8	-3.03	0.00123	167	0.132	0.999	17764	1
C3orf17	-10.65	8	-3.01	0.00132	168	0.14	0.999	17763	1
MYC	-10.63	8	-3	0.00134	169	0.142	0.999	17762	1
TRNT1	-10.56	8	-2.98	0.00143	170	0.151	0.999	17761	1
FDPS	-10.55	8	-2.98	0.00144	171	0.151	0.999	17760	1
NVL	-10.41	8	-2.94	0.00164	172	0.171	0.998	17759	1
ALYREF	-10.39	8	-2.93	0.00168	173	0.174	0.998	17758	1
AHCYL1	-10.37	8	-2.93	0.00171	174	0.175	0.998	17757	1
EP400NL	-10.37	8	-2.93	0.00171	175	0.175	0.998	17756	1
EPHX1	-10.35	8	-2.92	0.00173	176	0.177	0.998	17755	1
INHBE	-10.31	8	-2.91	0.0018	177	0.183	0.998	17754	1
CCR5	-10.29	8	-2.91	0.00183	178	0.185	0.998	17753	1
MRPL24	-10.27	8	-2.9	0.00188	179	0.188	0.998	17752	1
MAT2A	-10.25	8	-2.89	0.00191	180	0.19	0.998	17751	1
C17orf89	-10.24	8	-2.89	0.00192	181	0.19	0.998	17750	1
TOR3A	-10.23	8	-2.89	0.00193	182	0.191	0.998	17749	1
FCRLA	-10.22	8	-2.89	0.00195	183	0.191	0.998	17748	1
NOL11	-10.21	8	-2.88	0.00198	184	0.193	0.998	17747	1
RHOA	-10.18	8	-2.87	0.00203	185	0.197	0.998	17746	1
AQP6	-10.16	8	-2.87	0.00207	186	0.199	0.998	17745	1
TAF13	-10.15	8	-2.87	0.00208	187	0.199	0.998	17744	1
CRAMP1L	-10.15	8	-2.86	0.00209	188	0.199	0.998	17743	1
LCN10	-10.15	8	-2.86	0.0021	189	0.199	0.998	17742	1
NXPH4	-10.14	8	-2.86	0.00211	190	0.199	0.998	17741	1
C1orf172	-10.1	8	-2.85	0.00218	191	0.204	0.998	17740	1
COMP	-10.1	8	-2.85	0.00218	192	0.204	0.998	17739	1
NUAK2	-10.09	8	-2.85	0.00221	193	0.205	0.998	17738	1
PDCD11	-10.08	8	-2.84	0.00223	194	0.206	0.998	17737	1
TADA1	-10.07	8	-2.84	0.00225	195	0.206	0.998	17736	1
UPF2	-10.06	8	-2.84	0.00226	196	0.206	0.998	17735	1
BRF1	-10.06	8	-2.84	0.00227	197	0.206	0.998	17734	1
TP53BP2	-10.06	8	-2.84	0.00227	198	0.206	0.998	17733	1
IPO13	-10.02	8	-2.83	0.00234	199	0.21	0.998	17732	1
TAF4	-10.02	8	-2.83	0.00235	200	0.21	0.998	17731	1
CCNT1	-10.02	8	-2.83	0.00235	201	0.21	0.998	17730	1
ZNF648	-10	8	-2.82	0.0024	202	0.213	0.998	17729	1
CCT6A	-9.97	8	-2.81	0.00246	203	0.217	0.998	17728	1
HAUS8	-9.95	8	-2.81	0.0025	204	0.22	0.997	17727	1
RPL4	-9.94	8	-2.8	0.00253	205	0.221	0.997	17726	1
DDX21	-9.93	8	-2.8	0.00254	206	0.221	0.997	17725	1
MAU2	-9.9	8	-2.79	0.00262	207	0.227	0.997	17724	1
WDR43	-9.88	8	-2.79	0.00267	208	0.228	0.997	17723	1
YBX1	-9.87	8	-2.79	0.00267	209	0.228	0.997	17722	1
MAP2K7	-9.87	8	-2.78	0.00268	210	0.228	0.997	17721	1
NOL6	-9.87	8	-2.78	0.00269	211	0.228	0.997	17720	1
IRF6	-9.85	8	-2.78	0.00274	212	0.231	0.997	17719	1
GADD45B	-9.85	8	-2.78	0.00274	213	0.231	0.997	17718	1
TAF12	-9.8	8	-2.76	0.00286	214	0.24	0.997	17717	1
MEF2B	-9.78	8	-2.76	0.00291	215	0.242	0.997	17716	1
TAGLN2	-9.77	8	-2.76	0.00292	216	0.242	0.997	17715	1
CCT3	-9.77	8	-2.76	0.00293	217	0.242	0.997	17714	1
GMPS	-9.71	8	-2.74	0.00308	218	0.252	0.997	17713	1
NUP133	-9.71	8	-2.74	0.00308	219	0.252	0.997	17712	1
EHMT1	-9.69	8	-2.73	0.00315	220	0.257	0.997	17711	1
ATP2B4	-9.67	8	-2.73	0.00319	221	0.259	0.997	17710	1
RNF5	-9.66	8	-2.73	0.00322	222	0.26	0.997	17709	1
UCK1	-9.65	8	-2.72	0.00325	223	0.261	0.997	17708	1
MCL1	-9.65	8	-2.72	0.00326	224	0.261	0.997	17707	1
KIF23	-9.63	8	-2.72	0.00331	225	0.263	0.997	17706	1
CRYGB	-9.62	8	-2.71	0.00334	226	0.265	0.997	17705	1
MRPL36	-9.61	8	-2.71	0.00336	227	0.265	0.997	17704	1
PRR12	-9.58	8	-2.7	0.00346	228	0.272	0.997	17703	1
MMS22L	-9.51	8	-2.68	0.00367	229	0.287	0.996	17702	1
KLHL18	-9.5	8	-2.68	0.00369	230	0.288	0.996	17701	1
RPL19	-9.49	8	-2.67	0.00374	231	0.291	0.996	17700	1
GNB2L1	-9.45	8	-2.66	0.00386	232	0.298	0.996	17699	1
MCM4	-9.43	8	-2.66	0.00395	233	0.304	0.996	17698	1
C9orf116	-9.41	8	-2.65	0.004	234	0.306	0.996	17697	1
LTA	-9.41	8	-2.65	0.00401	235	0.306	0.996	17696	1
EIF5	-9.4	8	-2.65	0.00402	236	0.306	0.996	17695	1
POLQ	-9.37	8	-2.64	0.00413	237	0.312	0.996	17694	1
DUSP10	-9.36	8	-2.64	0.00417	238	0.314	0.996	17693	1
PRKAR1A	-9.34	8	-2.63	0.00423	239	0.317	0.996	17692	1
NINJ1	-9.34	8	-2.63	0.00425	240	0.317	0.996	17691	1
AARS	-9.33	8	-2.63	0.00429	241	0.319	0.996	17690	1
GALNS	-9.32	8	-2.63	0.00431	242	0.32	0.996	17689	1
SSBP4	-9.31	8	-2.62	0.00435	243	0.321	0.996	17688	1
LPAR2	-9.27	8	-2.61	0.0045	244	0.331	0.995	17687	1
PLEKHG2	-9.2	8	-2.59	0.00478	245	0.349	0.995	17686	1
YARS	-9.2	8	-2.59	0.00478	246	0.349	0.995	17685	1
ORC6	-9.19	8	-2.59	0.00481	247	0.349	0.995	17684	1
TONSL	-9.19	8	-2.59	0.00482	248	0.349	0.995	17683	1
WDTC1	-9.17	8	-2.58	0.00488	249	0.351	0.995	17682	1
MRPL15	-9.17	8	-2.58	0.00491	250	0.351	0.995	17681	1
PSMB7	-9.17	8	-2.58	0.00491	251	0.351	0.995	17680	1
MED15	-9.15	8	-2.58	0.00499	252	0.355	0.995	17679	1
TUBB	-9.14	8	-2.57	0.00503	253	0.355	0.995	17678	1
CAPN2	-9.13	8	-2.57	0.00504	254	0.355	0.995	17677	1
HAPLN2	-9.12	8	-2.57	0.0051	255	0.355	0.995	17676	1
SUPT6H	-9.12	8	-2.57	0.0051	256	0.355	0.995	17675	1
SFTPC	-9.12	8	-2.57	0.00511	257	0.355	0.995	17674	1
ABT1	-9.12	8	-2.57	0.00512	258	0.355	0.995	17673	1
SERTAD4	-9.11	8	-2.57	0.00513	259	0.355	0.995	17672	1
EFCAB4A	-9.11	8	-2.57	0.00516	260	0.356	0.995	17671	1
PRLH	-9.09	8	-2.56	0.00525	261	0.36	0.995	17670	1
CCT5	-9.07	8	-2.55	0.00531	262	0.363	0.995	17669	1
JAK3	-9.05	8	-2.55	0.0054	263	0.368	0.995	17668	1
XAB2	-7.83	6	-2.54	0.00547	264	0.371	0.995	17667	1
RAB6B	-9.03	8	-2.54	0.00552	265	0.372	0.994	17666	1
KCNJ9	-9.02	8	-2.54	0.00552	266	0.372	0.994	17665	1
DONSON	-9	8	-2.53	0.00564	267	0.379	0.994	17664	1
FTSJ3	-8.98	8	-2.53	0.00571	268	0.382	0.994	17663	1
DDX54	-8.96	8	-2.52	0.00582	269	0.388	0.994	17662	1
DNAJC19	-7.75	6	-2.52	0.00586	270	0.389	0.994	17661	1
FAM98C	-8.95	8	-2.52	0.00588	271	0.389	0.994	17660	1
GTF2A2	-8.91	8	-2.51	0.00605	272	0.399	0.994	17659	1
CSRP1	-8.87	8	-2.5	0.00625	273	0.41	0.994	17658	1
SPRTN	-8.85	8	-2.49	0.00636	274	0.415	0.994	17657	1
FOXL2	-8.85	8	-2.49	0.00637	275	0.415	0.994	17656	1
NOP16	-8.84	8	-2.49	0.0064	276	0.415	0.994	17655	1
ING3	-8.84	8	-2.49	0.00641	277	0.415	0.994	17654	1
FKBP8	-8.83	8	-2.49	0.00645	278	0.416	0.994	17653	1
AURKA	-8.82	8	-2.48	0.00654	279	0.42	0.993	17652	1
ACTL6A	-8.81	8	-2.48	0.00659	280	0.421	0.993	17651	1
CACNA1E	-8.81	8	-2.48	0.00659	281	0.421	0.993	17650	1
KLF15	-8.77	8	-2.47	0.00677	282	0.43	0.993	17649	1
CHCHD1	-8.77	8	-2.47	0.0068	283	0.43	0.993	17648	1
HAPLN4	-8.76	8	-2.47	0.00682	284	0.43	0.993	17647	1
ZG16B	-8.75	8	-2.46	0.0069	285	0.434	0.993	17646	1
SLBP	-8.74	8	-2.46	0.00696	286	0.436	0.993	17645	1
CACUL1	-8.73	8	-2.46	0.007	287	0.436	0.993	17644	1
MYRFL	-8.73	8	-2.46	0.00701	288	0.436	0.993	17643	1
FKBP5	-8.71	8	-2.45	0.0071	289	0.44	0.993	17642	1
TMEM161A	-8.7	8	-2.45	0.00718	290	0.442	0.993	17641	1
SCT	-8.7	8	-2.45	0.00718	291	0.442	0.993	17640	1
MAP3K12	-8.7	8	-2.45	0.00719	292	0.442	0.993	17639	1
DMAP1	-8.69	8	-2.45	0.00722	293	0.442	0.993	17638	1
C20orf24	-8.68	8	-2.44	0.00731	294	0.444	0.993	17637	1
MED26	-8.68	8	-2.44	0.00731	295	0.444	0.993	17636	1
EIF2B2	-8.65	8	-2.43	0.00746	296	0.452	0.993	17635	1
RCL1	-8.65	8	-2.43	0.00749	297	0.452	0.993	17634	1
PCNXL2	-8.63	8	-2.43	0.0076	298	0.456	0.992	17633	1
NARS	-8.62	8	-2.43	0.00763	299	0.456	0.992	17632	1
APOBEC4	-8.62	8	-2.43	0.00763	300	0.456	0.992	17631	1
EXTL1	-8.62	8	-2.42	0.00766	301	0.456	0.992	17630	1
IGF1R	-8.6	8	-2.42	0.00779	302	0.462	0.992	17629	1
TBCC	-8.59	8	-2.42	0.00781	303	0.462	0.992	17628	1
POLE	-8.57	8	-2.41	0.00794	304	0.468	0.992	17627	1
PSMD2	-8.55	8	-2.41	0.00807	305	0.475	0.992	17626	1
HESX1	-8.55	8	-2.4	0.0081	306	0.475	0.992	17625	1
SKA3	-8.54	8	-2.4	0.00816	307	0.477	0.992	17624	1
TRIM46	-8.49	8	-2.39	0.00845	308	0.492	0.992	17623	1
SNRNP35	-8.48	8	-2.38	0.00855	309	0.496	0.991	17622	1
ENAH	-8.45	8	-2.38	0.00871	310	0.504	0.991	17621	1
ANXA9	-8.45	8	-2.37	0.00878	311	0.506	0.991	17620	1
KCNK1	-8.44	8	-2.37	0.00883	312	0.506	0.991	17619	1
ACTR2	-8.44	8	-2.37	0.00884	313	0.506	0.991	17618	1
PAQR7	-8.43	8	-2.37	0.00888	314	0.507	0.991	17617	1
SEC61G	-7.29	6	-2.37	0.00895	315	0.51	0.991	17616	1
PLA2G12A	-8.4	8	-2.36	0.00905	316	0.514	0.991	17615	1
DHPS	-8.4	8	-2.36	0.00912	317	0.516	0.991	17614	1
FAM166A	-8.38	8	-2.36	0.00921	318	0.519	0.991	17613	1
ARL6IP5	-8.35	8	-2.35	0.00942	319	0.529	0.991	17612	1
TAF8	-8.35	8	-2.35	0.00945	320	0.529	0.991	17611	1
C1orf35	-8.34	8	-2.35	0.00951	321	0.531	0.99	17610	1
C3orf27	-8.33	8	-2.34	0.00958	322	0.534	0.99	17609	1
FAM43A	-8.32	8	-2.34	0.00968	323	0.537	0.99	17608	1
ZBTB37	-8.31	8	-2.34	0.00972	324	0.538	0.99	17607	1
TDRD10	-8.3	8	-2.33	0.00979	325	0.54	0.99	17606	1
CCDC86	-8.29	8	-2.33	0.0099	326	0.544	0.99	17605	1
BAK1	-8.29	8	-2.33	0.00993	327	0.544	0.99	17604	1
NDUFA9	-7.17	6	-2.33	0.01	328	0.546	0.99	17603	1
SMG6	-8.27	8	-2.32	0.01	329	0.546	0.99	17602	1
CNIH3	-8.27	8	-2.32	0.01	330	0.546	0.99	17601	1
PSMC1	-8.25	8	-2.32	0.0102	331	0.551	0.99	17600	1
TRUB2	-8.24	8	-2.32	0.0103	332	0.554	0.99	17599	1
NPM3	-8.23	8	-2.31	0.0104	333	0.559	0.99	17598	1
ZFX	-8.21	8	-2.31	0.0105	334	0.562	0.99	17597	1
DUSP12	-8.21	8	-2.31	0.0105	335	0.564	0.989	17596	1
DOK2	-8.2	8	-2.3	0.0106	336	0.566	0.989	17595	1
DHX40	-8.17	8	-2.3	0.0108	337	0.575	0.989	17594	1
HCN4	-8.16	8	-2.29	0.011	338	0.579	0.989	17593	1
SLC39A5	-8.16	8	-2.29	0.011	339	0.579	0.989	17592	1
POLR2F	-8.15	8	-2.29	0.011	340	0.579	0.989	17591	1
TCF23	-8.15	8	-2.29	0.011	341	0.579	0.989	17590	1
C9orf114	-8.14	8	-2.29	0.0111	342	0.579	0.989	17589	1
IFT88	-8.14	8	-2.29	0.0111	343	0.58	0.989	17588	1
POLR1B	-8.14	8	-2.29	0.0111	344	0.58	0.989	17587	1
NES	-8.13	8	-2.28	0.0112	345	0.581	0.989	17586	1
ABCB10	-8.12	8	-2.28	0.0112	346	0.581	0.989	17585	1
BTD	-8.12	8	-2.28	0.0113	347	0.581	0.989	17584	1
EWSR1	-8.12	8	-2.28	0.0113	348	0.581	0.989	17583	1
MED21	-8.11	8	-2.28	0.0113	349	0.581	0.989	17582	1
LRIG1	-8.1	8	-2.28	0.0114	350	0.586	0.989	17581	1
DDX39B	-8.09	8	-2.27	0.0115	351	0.586	0.989	17580	1
SEMA4A	-8.09	8	-2.27	0.0115	352	0.586	0.988	17579	1
RPL7	-7	6	-2.27	0.0116	353	0.59	0.988	17578	1
FAM47E	-8.07	8	-2.27	0.0117	354	0.591	0.988	17577	1
SCNM1	-8.06	8	-2.26	0.0118	355	0.596	0.988	17576	1
HPCA	-6.97	6	-2.26	0.0118	356	0.596	0.988	17575	1
FCRL4	-8.04	8	-2.26	0.012	357	0.6	0.988	17574	1
RD3	-8.03	8	-2.26	0.012	358	0.602	0.988	17573	1
ADCK3	-8.01	8	-2.25	0.0122	359	0.61	0.988	17572	1
IMP4	-8.01	8	-2.25	0.0123	360	0.611	0.988	17571	1
G6PD	-7.99	8	-2.24	0.0124	361	0.616	0.988	17570	1
RAD21	-7.99	8	-2.24	0.0124	362	0.616	0.988	17569	1
TTC24	-7.98	8	-2.24	0.0125	363	0.616	0.988	17568	1
CCNA2	-7.98	8	-2.24	0.0125	364	0.616	0.987	17567	1
CSF2RB	-7.97	8	-2.24	0.0126	365	0.616	0.987	17566	1
CENPF	-7.97	8	-2.24	0.0126	366	0.616	0.987	17565	1
MARVELD1	-7.96	8	-2.24	0.0127	367	0.617	0.987	17564	1
GABRD	-7.96	8	-2.24	0.0127	368	0.617	0.987	17563	1
COL16A1	-6.89	6	-2.23	0.0128	369	0.621	0.987	17562	1
COX14	-7.93	8	-2.23	0.0129	370	0.627	0.987	17561	1
C15orf27	-7.93	8	-2.23	0.013	371	0.628	0.987	17560	1
MED13L	-7.92	8	-2.22	0.0131	372	0.63	0.987	17559	1
TM4SF1	-7.92	8	-2.22	0.0131	373	0.63	0.987	17558	1
FAM63A	-7.91	8	-2.22	0.0131	374	0.63	0.987	17557	1
KIAA1429	-7.89	8	-2.22	0.0133	375	0.635	0.987	17556	1
RAB42	-7.89	8	-2.22	0.0133	376	0.635	0.987	17555	1
UPF1	-6.83	6	-2.22	0.0134	377	0.636	0.987	17554	1
TMEM141	-7.88	8	-2.21	0.0134	378	0.637	0.987	17553	1
DCAF13	-7.88	8	-2.21	0.0135	379	0.637	0.987	17552	1
TRDMT1	-7.87	8	-2.21	0.0135	380	0.639	0.986	17551	1
MFSD1	-7.85	8	-2.21	0.0137	381	0.645	0.986	17550	1
SDS	-7.85	8	-2.2	0.0138	382	0.645	0.986	17549	1
CDC37	-7.85	8	-2.2	0.0138	383	0.645	0.986	17548	1
C10orf55	-7.84	8	-2.2	0.0138	384	0.645	0.986	17547	1
RPL32	-3.92	2	-2.2	0.0139	385	0.645	0.986	17546	1
C12orf45	-7.84	8	-2.2	0.0139	386	0.645	0.986	17545	1
ARX	-7.83	8	-2.2	0.0139	387	0.645	0.986	17544	1
CSNK2B	-7.82	8	-2.2	0.014	388	0.648	0.986	17543	1
RBM10	-7.81	8	-2.19	0.0141	389	0.652	0.986	17542	1
STRADB	-7.8	8	-2.19	0.0143	390	0.657	0.986	17541	1
CR2	-6.14	5	-2.18	0.0146	391	0.666	0.985	17540	1
XYLT2	-7.77	8	-2.18	0.0146	392	0.666	0.985	17539	1
USF1	-7.76	8	-2.18	0.0147	393	0.666	0.985	17538	1
BLCAP	-7.76	8	-2.18	0.0147	394	0.666	0.985	17537	1
RAPGEF3	-7.76	8	-2.18	0.0147	395	0.666	0.985	17536	1
PSRC1	-7.76	8	-2.18	0.0147	396	0.666	0.985	17535	1
XRCC6BP1	-7.75	8	-2.18	0.0148	397	0.668	0.985	17534	1
NOL8	-7.74	8	-2.17	0.0149	398	0.673	0.985	17533	1
NSL1	-7.73	8	-2.17	0.015	399	0.676	0.985	17532	1
CGN	-7.73	8	-2.17	0.0151	400	0.676	0.985	17531	1
DNTTIP2	-7.72	8	-2.17	0.0151	401	0.677	0.985	17530	1
CCSAP	-7.71	8	-2.16	0.0153	402	0.682	0.985	17529	1
WNT9A	-7.7	8	-2.16	0.0154	403	0.683	0.985	17528	1
OR7A10	-5.44	4	-2.16	0.0155	404	0.686	0.985	17527	1
PIK3CG	-7.68	8	-2.16	0.0155	405	0.688	0.984	17526	1
ASPM	-7.65	8	-2.15	0.0159	406	0.704	0.984	17525	1
KLHDC9	-7.64	8	-2.14	0.016	407	0.704	0.984	17524	1
DHX9	-7.64	8	-2.14	0.016	408	0.704	0.984	17523	1
TRAF3IP3	-7.64	8	-2.14	0.016	409	0.704	0.984	17522	1
TMEM8C	-7.63	8	-2.14	0.0161	410	0.706	0.984	17521	1
ZNRD1	-7.6	8	-2.13	0.0164	411	0.715	0.984	17520	1
CYBA	-7.6	8	-2.13	0.0164	412	0.715	0.984	17519	1
SUOX	-7.6	8	-2.13	0.0165	413	0.715	0.983	17518	1
TTK	-7.6	8	-2.13	0.0165	414	0.715	0.983	17517	1
DISC1	-7.59	8	-2.13	0.0166	415	0.715	0.983	17516	1
ELMO2	-7.59	8	-2.13	0.0166	416	0.715	0.983	17515	1
SP8	-7.59	8	-2.13	0.0166	417	0.715	0.983	17514	1
SIN3B	-7.58	8	-2.13	0.0167	418	0.715	0.983	17513	1
SNX8	-7.58	8	-2.13	0.0167	419	0.715	0.983	17512	1
GBF1	-7.57	8	-2.12	0.0169	420	0.72	0.983	17511	1
SLC30A10	-7.55	8	-2.12	0.0171	421	0.729	0.983	17510	1
RPF1	-7.53	8	-2.11	0.0173	422	0.737	0.983	17509	1
FAM46B	-7.53	8	-2.11	0.0174	423	0.737	0.983	17508	1
NAT10	-7.52	8	-2.11	0.0175	424	0.739	0.982	17507	1
ETV7	-7.52	8	-2.11	0.0175	425	0.739	0.982	17506	1
RPL27	-5.3	4	-2.1	0.0177	426	0.745	0.982	17505	1
LYZ	-7.5	8	-2.1	0.0177	427	0.745	0.982	17504	1
GATC	-7.48	8	-2.1	0.0179	428	0.751	0.982	17503	1
CLDN4	-7.47	8	-2.1	0.018	429	0.754	0.982	17502	1
FAM109B	-6.46	6	-2.09	0.0182	430	0.756	0.982	17501	1
WDR74	-7.46	8	-2.09	0.0182	431	0.756	0.982	17500	1
ELF3	-7.46	8	-2.09	0.0183	432	0.756	0.982	17499	1
SLC39A7	-7.46	8	-2.09	0.0183	433	0.756	0.982	17498	1
RNF113A	-7.45	8	-2.09	0.0183	434	0.756	0.982	17497	1
UTF1	-6.45	6	-2.09	0.0183	435	0.756	0.982	17496	1
SSNA1	-7.44	8	-2.09	0.0185	436	0.761	0.981	17495	1
SLC35F3	-7.43	8	-2.08	0.0186	437	0.764	0.981	17494	1
KRTCAP2	-7.42	8	-2.08	0.0187	438	0.764	0.981	17493	1
NUP153	-7.42	8	-2.08	0.0187	439	0.764	0.981	17492	1
TOMM70A	-7.42	8	-2.08	0.0187	440	0.764	0.981	17491	1
HOXC6	-7.41	8	-2.08	0.0189	441	0.765	0.981	17490	1
AMN1	-7.41	8	-2.08	0.0189	442	0.765	0.981	17489	1
C19orf53	-7.4	8	-2.08	0.019	443	0.765	0.981	17488	1
GPN3	-7.4	8	-2.08	0.019	444	0.765	0.981	17487	1
RASAL2	-7.4	8	-2.07	0.019	445	0.765	0.981	17486	1
IRAK1	-7.4	8	-2.07	0.019	446	0.765	0.981	17485	1
IFT122	-7.39	8	-2.07	0.0191	447	0.767	0.981	17484	1
SEC61A1	-7.39	8	-2.07	0.0192	448	0.767	0.981	17483	1
DDX51	-7.37	8	-2.07	0.0194	449	0.772	0.981	17482	1
SUSD4	-7.37	8	-2.07	0.0194	450	0.772	0.981	17481	1
QRICH1	-7.36	8	-2.06	0.0195	451	0.775	0.981	17480	1
TOMM20	-7.35	8	-2.06	0.0197	452	0.781	0.98	17479	1
ETNK2	-7.34	8	-2.06	0.0198	453	0.781	0.98	17478	1
IPO7	-7.34	8	-2.06	0.0198	454	0.781	0.98	17477	1
RNF7	-7.34	8	-2.06	0.0198	455	0.781	0.98	17476	1
TIMM44	-7.33	8	-2.06	0.0199	456	0.781	0.98	17475	1
CALR	-7.33	8	-2.06	0.0199	457	0.781	0.98	17474	1
CTSC	-7.32	8	-2.05	0.02	458	0.784	0.98	17473	1
ADIRF	-7.32	8	-2.05	0.0201	459	0.784	0.98	17472	1
C1orf189	-7.32	8	-2.05	0.0201	460	0.784	0.98	17471	1
PEF1	-7.31	8	-2.05	0.0203	461	0.789	0.98	17470	1
GNL2	-7.29	8	-2.04	0.0206	462	0.799	0.979	17469	1
CDK18	-7.27	8	-2.04	0.0208	463	0.801	0.979	17468	1
SLC45A3	-7.27	8	-2.04	0.0208	464	0.801	0.979	17467	1
DLGAP1	-7.27	8	-2.04	0.0208	465	0.801	0.979	17466	1
RAD51AP1	-7.26	8	-2.04	0.0209	466	0.801	0.979	17465	1
DBF4	-7.25	8	-2.03	0.021	467	0.801	0.979	17464	1
HIST1H2BK	-6.28	6	-2.03	0.021	468	0.801	0.979	17463	1
RCSD1	-7.25	8	-2.03	0.021	469	0.801	0.979	17462	1
MAD2L1BP	-7.25	8	-2.03	0.0211	470	0.801	0.979	17461	1
ZNF574	-7.25	8	-2.03	0.0211	471	0.801	0.979	17460	1
PRAMEF2	-6.28	6	-2.03	0.0211	472	0.801	0.979	17459	1
ACN9	-7.23	8	-2.03	0.0214	473	0.809	0.979	17458	1
C3orf58	-7.23	8	-2.03	0.0214	474	0.809	0.979	17457	1
TMIE	-7.23	8	-2.02	0.0214	475	0.809	0.979	17456	1
PDZD7	-7.22	8	-2.02	0.0216	476	0.812	0.978	17455	1
RUFY2	-7.2	8	-2.02	0.0218	477	0.818	0.978	17454	1
HPS6	-7.19	8	-2.01	0.022	478	0.823	0.978	17453	1
RBM48	-7.19	8	-2.01	0.022	479	0.823	0.978	17452	1
WDR75	-7.19	8	-2.01	0.022	480	0.823	0.978	17451	1
RNF168	-7.17	8	-2.01	0.0222	481	0.829	0.978	17450	1
LAMC1	-7.17	8	-2.01	0.0223	482	0.829	0.978	17449	1
CDSN	-7.17	8	-2.01	0.0223	483	0.829	0.978	17448	1
ULBP3	-7.16	8	-2.01	0.0224	484	0.83	0.978	17447	1
CCAR2	-7.16	8	-2.01	0.0225	485	0.83	0.978	17446	1
ZNF174	-7.15	8	-2	0.0226	486	0.832	0.977	17445	1
SLC30A1	-7.15	8	-2	0.0226	487	0.832	0.977	17444	1
ATP13A1	-7.14	8	-2	0.0227	488	0.834	0.977	17443	1
ACOT11	-7.13	8	-2	0.0229	489	0.837	0.977	17442	1
ASIC1	-6.17	6	-2	0.0229	490	0.837	0.977	17441	1
ZNF589	-7.13	8	-2	0.023	491	0.837	0.977	17440	1
LMTK2	-7.12	8	-1.99	0.0231	492	0.837	0.977	17439	1
LTV1	-7.12	8	-1.99	0.0231	493	0.837	0.977	17438	1
TAF5L	-7.12	8	-1.99	0.0231	494	0.837	0.977	17437	1
STAT6	-7.11	8	-1.99	0.0232	495	0.837	0.977	17436	1
RAB32	-7.1	8	-1.99	0.0233	496	0.837	0.977	17435	1
CILP2	-7.1	8	-1.99	0.0233	497	0.837	0.977	17434	1
PSEN2	-7.1	8	-1.99	0.0234	498	0.837	0.977	17433	1
TMEM206	-6.15	6	-1.99	0.0234	499	0.837	0.977	17432	1
EXOSC7	-7.09	8	-1.99	0.0235	500	0.837	0.977	17431	1
RBM33	-7.09	8	-1.99	0.0235	501	0.837	0.976	17430	1
ANGEL2	-7.09	8	-1.99	0.0235	502	0.837	0.976	17429	1
RAD54L	-7.09	8	-1.99	0.0235	503	0.837	0.976	17428	1
ANAPC2	-7.09	8	-1.99	0.0236	504	0.837	0.976	17427	1
C12orf61	-7.09	8	-1.98	0.0236	505	0.837	0.976	17426	1
NMNAT2	-7.08	8	-1.98	0.0236	506	0.837	0.976	17425	1
LAD1	-7.08	8	-1.98	0.0238	507	0.837	0.976	17424	1
KLHL15	-7.07	8	-1.98	0.0238	508	0.837	0.976	17423	1
RAB25	-7.07	8	-1.98	0.0238	509	0.837	0.976	17422	1
BAZ2A	-7.07	8	-1.98	0.0238	510	0.837	0.976	17421	1
MED4	-7.06	8	-1.98	0.0241	511	0.844	0.976	17420	1
BTAF1	-7.05	8	-1.97	0.0242	512	0.847	0.976	17419	1
CAPN9	-7.05	8	-1.97	0.0242	513	0.847	0.976	17418	1
TIMM17A	-7.04	8	-1.97	0.0243	514	0.847	0.976	17417	1
SEC62	-7.04	8	-1.97	0.0244	515	0.849	0.976	17416	1
TMEM9	-7.03	8	-1.97	0.0245	516	0.849	0.976	17415	1
STK35	-7.03	8	-1.97	0.0245	517	0.849	0.975	17414	1
LYST	-7.03	8	-1.97	0.0245	518	0.849	0.975	17413	1
GRIN3B	-7.03	8	-1.97	0.0246	519	0.849	0.975	17412	1
MRS2	-7.01	8	-1.96	0.0248	520	0.854	0.975	17411	1
AURKB	-7.01	8	-1.96	0.0249	521	0.855	0.975	17410	1
ADAM8	-7.01	8	-1.96	0.0249	522	0.855	0.975	17409	1
CLDN6	-6.99	8	-1.96	0.0252	523	0.861	0.975	17408	1
YIPF3	-6.99	8	-1.96	0.0252	524	0.861	0.975	17407	1
GPR162	-6.99	8	-1.96	0.0252	525	0.861	0.975	17406	1
AVPR1B	-6.98	8	-1.95	0.0253	526	0.861	0.975	17405	1
EGLN1	-6.98	8	-1.95	0.0253	527	0.861	0.975	17404	1
KCNH1	-6.95	8	-1.95	0.0258	528	0.875	0.974	17403	1
RHOT2	-6.95	8	-1.95	0.0258	529	0.875	0.974	17402	1
CRISPLD2	-6.95	8	-1.94	0.0259	530	0.875	0.974	17401	1
TNFSF8	-6.95	8	-1.94	0.0259	531	0.875	0.974	17400	1
NDUFS2	-6.94	8	-1.94	0.026	532	0.875	0.974	17399	1
TRIM63	-6.93	8	-1.94	0.0262	533	0.878	0.974	17398	1
FLT3LG	-6.93	8	-1.94	0.0262	534	0.878	0.974	17397	1
MUC1	-6.93	8	-1.94	0.0262	535	0.878	0.974	17396	1
NIPBL	-6.92	8	-1.94	0.0263	536	0.878	0.974	17395	1
SMARCC2	-6.92	8	-1.94	0.0263	537	0.878	0.974	17394	1
MED20	-6.92	8	-1.94	0.0264	538	0.878	0.974	17393	1
C19orf44	-6.91	8	-1.93	0.0265	539	0.878	0.973	17392	1
FANK1	-3.46	2	-1.93	0.0265	540	0.878	0.973	17391	1
EXD3	-6.91	8	-1.93	0.0265	541	0.878	0.973	17390	1
MED14	-6.91	8	-1.93	0.0265	542	0.878	0.973	17389	1
KIAA1614	-6.9	8	-1.93	0.0267	543	0.88	0.973	17388	1
MED6	-6.89	8	-1.93	0.0269	544	0.886	0.973	17387	1
KANK3	-6.89	8	-1.93	0.0269	545	0.886	0.973	17386	1
CRTC1	-6.88	8	-1.92	0.0271	546	0.891	0.973	17385	1
PPP1R15B	-6.87	8	-1.92	0.0272	547	0.891	0.973	17384	1
DIRC2	-6.87	8	-1.92	0.0272	548	0.891	0.973	17383	1
THEMIS2	-6.87	8	-1.92	0.0273	549	0.891	0.973	17382	1
HSD17B3	-6.86	8	-1.92	0.0274	550	0.895	0.973	17381	1
MEAF6	-6.85	8	-1.92	0.0276	551	0.897	0.972	17380	1
STOML1	-6.84	8	-1.91	0.0277	552	0.901	0.972	17379	1
RANGAP1	-6.84	8	-1.91	0.0279	553	0.901	0.972	17378	1
BMS1	-6.83	8	-1.91	0.0279	554	0.901	0.972	17377	1
PIN4	-6.83	8	-1.91	0.0279	555	0.901	0.972	17376	1
CREB3L4	-6.83	8	-1.91	0.028	556	0.901	0.972	17375	1
NUDT21	-6.82	8	-1.91	0.0281	557	0.905	0.972	17374	1
CKB	-6.82	8	-1.91	0.0282	558	0.905	0.972	17373	1
OR10K1	-6.82	8	-1.91	0.0282	559	0.905	0.972	17372	1
EBLN2	-6.82	8	-1.91	0.0283	560	0.905	0.972	17371	1
H1FOO	-6.81	8	-1.91	0.0284	561	0.906	0.972	17370	1
TBCB	-6.8	8	-1.9	0.0285	562	0.906	0.972	17369	1
BICD2	-6.8	8	-1.9	0.0285	563	0.906	0.972	17368	1
CENPL	-6.8	8	-1.9	0.0285	564	0.906	0.971	17367	1
TBP	-6.8	8	-1.9	0.0285	565	0.906	0.971	17366	1
AIFM2	-6.79	8	-1.9	0.0287	566	0.91	0.971	17365	1
TCEB3	-6.79	8	-1.9	0.0288	567	0.911	0.971	17364	1
EPN1	-6.78	8	-1.9	0.0289	568	0.912	0.971	17363	1
DDN	-6.78	8	-1.9	0.029	569	0.913	0.971	17362	1
EIF5AL1	-5.87	6	-1.9	0.029	570	0.913	0.971	17361	1
KLHL26	-6.76	8	-1.89	0.0294	571	0.919	0.971	17360	1
OR51A7	-6.75	8	-1.89	0.0294	572	0.919	0.971	17359	1
PRKCH	-6.75	8	-1.89	0.0295	573	0.919	0.97	17358	1
COQ4	-6.75	8	-1.89	0.0295	574	0.919	0.97	17357	1
KLHL40	-6.75	8	-1.89	0.0296	575	0.919	0.97	17356	1
MFSD4	-6.74	8	-1.89	0.0296	576	0.919	0.97	17355	1
RAE1	-6.74	8	-1.89	0.0297	577	0.919	0.97	17354	1
C3orf62	-6.74	8	-1.89	0.0297	578	0.919	0.97	17353	1
TIMP4	-6.74	8	-1.88	0.0297	579	0.919	0.97	17352	1
TOR1AIP1	-6.74	8	-1.88	0.0298	580	0.919	0.97	17351	1
ETV2	-6.73	8	-1.88	0.0298	581	0.919	0.97	17350	1
SERPINA10	-6.73	8	-1.88	0.0299	582	0.919	0.97	17349	1
PLCB3	-6.73	8	-1.88	0.0299	583	0.919	0.97	17348	1
GATA2	-6.73	8	-1.88	0.0299	584	0.919	0.97	17347	1
TOP2A	-6.72	8	-1.88	0.03	585	0.919	0.97	17346	1
HECTD3	-6.72	8	-1.88	0.0301	586	0.92	0.97	17345	1
COL11A2	-6.72	8	-1.88	0.0301	587	0.92	0.97	17344	1
GPR137C	-6.72	8	-1.88	0.0302	588	0.92	0.97	17343	1
PACRG	-6.7	8	-1.87	0.0306	589	0.929	0.969	17342	1
BAG3	-6.7	8	-1.87	0.0306	590	0.929	0.969	17341	1
ARV1	-6.69	8	-1.87	0.0306	591	0.929	0.969	17340	1
CD164L2	-6.69	8	-1.87	0.0307	592	0.929	0.969	17339	1
OLFML3	-6.68	8	-1.87	0.0308	593	0.929	0.969	17338	1
C9orf91	-6.68	8	-1.87	0.0309	594	0.929	0.969	17337	1
DBR1	-6.68	8	-1.87	0.0309	595	0.929	0.969	17336	1
CARS	-6.68	8	-1.87	0.0309	596	0.929	0.969	17335	1
UTP20	-6.67	8	-1.87	0.031	597	0.929	0.969	17334	1
EXOSC9	-6.67	8	-1.87	0.031	598	0.929	0.969	17333	1
NFATC2IP	-6.67	8	-1.87	0.031	599	0.929	0.969	17332	1
TSR2	-6.67	8	-1.87	0.0311	600	0.929	0.969	17331	1
BHLHA15	-6.66	8	-1.86	0.0312	601	0.929	0.969	17330	1
MCM3AP	-6.66	8	-1.86	0.0312	602	0.929	0.969	17329	1
AK1	-6.66	8	-1.86	0.0313	603	0.929	0.969	17328	1
ACTR5	-6.65	8	-1.86	0.0314	604	0.929	0.969	17327	1
SERPINA7	-6.65	8	-1.86	0.0314	605	0.929	0.969	17326	1
THEM5	-6.65	8	-1.86	0.0315	606	0.929	0.969	17325	1
TNKS2	-6.65	8	-1.86	0.0315	607	0.929	0.968	17324	1
FGD2	-6.65	8	-1.86	0.0315	608	0.929	0.968	17323	1
MRPL4	-6.64	8	-1.86	0.0316	609	0.929	0.968	17322	1
OIP5	-6.64	8	-1.86	0.0316	610	0.929	0.968	17321	1
NACC1	-6.64	8	-1.86	0.0316	611	0.929	0.968	17320	1
SUSD3	-6.64	8	-1.86	0.0317	612	0.93	0.968	17319	1
MRPL14	-6.63	8	-1.85	0.0318	613	0.93	0.968	17318	1
MOG	-6.63	8	-1.85	0.0319	614	0.93	0.968	17317	1
BOLA1	-6.63	8	-1.85	0.032	615	0.93	0.968	17316	1
MT1M	-3.31	2	-1.85	0.032	616	0.93	0.968	17315	1
PLD5	-6.62	8	-1.85	0.0321	617	0.93	0.968	17314	1
TPPP	-6.62	8	-1.85	0.0321	618	0.93	0.968	17313	1
CDC23	-6.62	8	-1.85	0.0321	619	0.93	0.968	17312	1
LCE6A	-6.62	8	-1.85	0.0322	620	0.93	0.968	17311	1
PSMB9	-6.61	8	-1.85	0.0322	621	0.93	0.968	17310	1
PDAP1	-6.61	8	-1.85	0.0324	622	0.934	0.968	17309	1
SMG1	-6.6	8	-1.84	0.0326	623	0.937	0.967	17308	1
FAM204A	-6.6	8	-1.84	0.0326	624	0.937	0.967	17307	1
PSMC4	-6.59	8	-1.84	0.0327	625	0.937	0.967	17306	1
HEBP1	-6.59	8	-1.84	0.0328	626	0.938	0.967	17305	1
PINK1	-6.59	8	-1.84	0.0328	627	0.938	0.967	17304	1
MFAP2	-6.58	8	-1.84	0.033	628	0.94	0.967	17303	1
IGDCC4	-6.58	8	-1.84	0.033	629	0.94	0.967	17302	1
RPS9	-6.57	8	-1.84	0.0331	630	0.941	0.967	17301	1
VIT	-6.57	8	-1.84	0.0331	631	0.941	0.967	17300	1
NGLY1	-6.57	8	-1.84	0.0332	632	0.943	0.967	17299	1
FICD	-6.56	8	-1.83	0.0334	633	0.943	0.967	17298	1
NDUFB7	-6.56	8	-1.83	0.0334	634	0.943	0.967	17297	1
ACRBP	-6.56	8	-1.83	0.0334	635	0.943	0.967	17296	1
SLC22A31	-6.55	8	-1.83	0.0335	636	0.943	0.967	17295	1
HES6	-6.55	8	-1.83	0.0335	637	0.943	0.967	17294	1
NDUFA13	-6.55	8	-1.83	0.0336	638	0.944	0.966	17293	1
MAP2K1	-6.54	8	-1.83	0.0338	639	0.948	0.966	17292	1
SLAMF9	-6.54	8	-1.83	0.0338	640	0.948	0.966	17291	1
HIST3H2A	-6.53	8	-1.83	0.034	641	0.95	0.966	17290	1
KIAA0907	-6.53	8	-1.82	0.034	642	0.95	0.966	17289	1
ISCA1	-3.26	2	-1.82	0.0341	643	0.95	0.966	17288	1
SH3GL3	-6.52	8	-1.82	0.0342	644	0.95	0.966	17287	1
GHITM	-6.52	8	-1.82	0.0342	645	0.95	0.966	17286	1
EIF4G1	-6.52	8	-1.82	0.0343	646	0.95	0.966	17285	1
SPOP	-6.52	8	-1.82	0.0343	647	0.95	0.966	17284	1
ARNT	-6.51	8	-1.82	0.0344	648	0.953	0.966	17283	1
RTP1	-6.5	8	-1.82	0.0346	649	0.956	0.965	17282	1
CDK11A	-6.5	8	-1.82	0.0347	650	0.957	0.965	17281	1
APOLD1	-6.49	8	-1.81	0.0348	651	0.957	0.965	17280	1
HGS	-6.49	8	-1.81	0.0348	652	0.957	0.965	17279	1
HOOK2	-6.49	8	-1.81	0.0348	653	0.957	0.965	17278	1
BOP1	-6.48	8	-1.81	0.035	654	0.96	0.965	17277	1
WDR26	-5.61	6	-1.81	0.0351	655	0.961	0.965	17276	1
NOP56	-6.48	8	-1.81	0.0351	656	0.961	0.965	17275	1
C9orf89	-6.47	8	-1.81	0.0353	657	0.962	0.965	17274	1
MEF2BNB	-6.47	8	-1.81	0.0353	658	0.962	0.965	17273	1
NOP2	-6.47	8	-1.81	0.0354	659	0.963	0.965	17272	1
RTBDN	-6.46	8	-1.81	0.0355	660	0.965	0.964	17271	1
PCID2	-6.45	8	-1.8	0.0359	661	0.966	0.964	17270	1
CLIC3	-6.44	8	-1.8	0.0361	662	0.966	0.964	17269	1
FBXL18	-6.43	8	-1.8	0.0362	663	0.966	0.964	17268	1
FOXM1	-6.43	8	-1.8	0.0362	664	0.966	0.964	17267	1
ZNF584	-6.43	8	-1.8	0.0362	665	0.966	0.964	17266	1
RNF187	-6.43	8	-1.8	0.0363	666	0.966	0.964	17265	1
C1orf54	-6.43	8	-1.8	0.0363	667	0.966	0.964	17264	1
TMPRSS13	-6.42	8	-1.79	0.0364	668	0.966	0.964	17263	1
DECR1	-6.42	8	-1.79	0.0365	669	0.966	0.963	17262	1
NUP98	-6.41	8	-1.79	0.0366	670	0.966	0.963	17261	1
MST1	-6.41	8	-1.79	0.0366	671	0.966	0.963	17260	1
SENP6	-6.4	8	-1.79	0.0369	672	0.966	0.963	17259	1
FBXL14	-6.4	8	-1.79	0.037	673	0.966	0.963	17258	1
PSD3	-6.39	8	-1.79	0.037	674	0.966	0.963	17257	1
NDUFB5	-6.39	8	-1.79	0.0371	675	0.966	0.963	17256	1
SLC31A1	-6.39	8	-1.78	0.0371	676	0.966	0.963	17255	1
PDE1B	-6.39	8	-1.78	0.0372	677	0.966	0.963	17254	1
ZC3H3	-6.39	8	-1.78	0.0372	678	0.966	0.963	17253	1
DDX11	-6.39	8	-1.78	0.0372	679	0.966	0.963	17252	1
ABTB1	-6.38	8	-1.78	0.0374	680	0.966	0.963	17251	1
ENPP4	-6.37	8	-1.78	0.0376	681	0.966	0.962	17250	1
GALNT4	-6.37	8	-1.78	0.0377	682	0.966	0.962	17249	1
XPO1	-5.96	7	-1.78	0.0377	683	0.966	0.962	17248	1
PSMG4	-6.36	8	-1.78	0.0378	684	0.966	0.962	17247	1
HIST1H3H	-6.35	8	-1.77	0.038	685	0.966	0.962	17246	1
GALNT9	-6.35	8	-1.77	0.038	686	0.966	0.962	17245	1
AWAT1	-6.35	8	-1.77	0.038	687	0.966	0.962	17244	1
SP3	-6.35	8	-1.77	0.0381	688	0.966	0.962	17243	1
TLX1	-6.34	8	-1.77	0.0383	689	0.966	0.962	17242	1
PLEKHO1	-6.34	8	-1.77	0.0384	690	0.966	0.962	17241	1
CNTN3	-6.34	8	-1.77	0.0384	691	0.966	0.962	17240	1
TAF6	-6.34	8	-1.77	0.0384	692	0.966	0.962	17239	1
LBR	-6.33	8	-1.77	0.0385	693	0.966	0.961	17238	1
MORN3	-6.33	8	-1.77	0.0386	694	0.966	0.961	17237	1
ALG2	-6.33	8	-1.77	0.0386	695	0.966	0.961	17236	1
RBP4	-6.33	8	-1.77	0.0387	696	0.966	0.961	17235	1
UTP15	-6.32	8	-1.77	0.0387	697	0.966	0.961	17234	1
EFCAB4B	-6.31	8	-1.76	0.039	698	0.966	0.961	17233	1
ZKSCAN8	-6.31	8	-1.76	0.039	699	0.966	0.961	17232	1
TTI1	-6.31	8	-1.76	0.039	700	0.966	0.961	17231	1
WNK2	-6.31	8	-1.76	0.0391	701	0.966	0.961	17230	1
DISP1	-6.31	8	-1.76	0.0391	702	0.966	0.961	17229	1
RAB3A	-6.3	8	-1.76	0.0393	703	0.966	0.961	17228	1
SRP72	-6.3	8	-1.76	0.0394	704	0.966	0.961	17227	1
TMEM259	-6.29	8	-1.76	0.0394	705	0.966	0.961	17226	1
PYGO2	-6.29	8	-1.76	0.0395	706	0.966	0.96	17225	1
TFEB	-6.28	8	-1.75	0.0399	707	0.966	0.96	17224	0.999
CCER1	-6.28	8	-1.75	0.0399	708	0.966	0.96	17223	0.999
CNOT3	-6.27	8	-1.75	0.0399	709	0.966	0.96	17222	0.999
AHCTF1	-6.27	8	-1.75	0.04	710	0.966	0.96	17221	0.999
CCR4	-6.27	8	-1.75	0.0401	711	0.966	0.96	17220	0.999
LRRN2	-6.27	8	-1.75	0.0401	712	0.966	0.96	17219	0.999
TGFB2	-6.27	8	-1.75	0.0402	713	0.966	0.96	17218	0.999
MPV17L2	-6.26	8	-1.75	0.0402	714	0.966	0.96	17217	0.999
ZNF595	-3.13	2	-1.75	0.0403	715	0.966	0.96	17216	0.999
RCOR3	-6.26	8	-1.75	0.0403	716	0.966	0.96	17215	0.999
NOL3	-6.26	8	-1.75	0.0404	717	0.966	0.96	17214	0.999
WDR1	-6.25	8	-1.75	0.0404	718	0.966	0.96	17213	0.999
SCNN1A	-6.25	8	-1.75	0.0404	719	0.966	0.96	17212	0.999
FLG	-6.25	8	-1.75	0.0405	720	0.966	0.96	17211	0.999
CCT8	-6.25	8	-1.74	0.0405	721	0.966	0.959	17210	0.999
FBXL12	-6.24	8	-1.74	0.0407	722	0.966	0.959	17209	0.999
AQP5	-6.24	8	-1.74	0.0407	723	0.966	0.959	17208	0.999
ZNF710	-6.24	8	-1.74	0.0407	724	0.966	0.959	17207	0.999
ZNF347	-6.24	8	-1.74	0.0408	725	0.966	0.959	17206	0.999
ENDOG	-6.23	8	-1.74	0.0409	726	0.966	0.959	17205	0.999
CITED2	-6.23	8	-1.74	0.041	727	0.966	0.959	17204	0.999
NCSTN	-6.23	8	-1.74	0.041	728	0.966	0.959	17203	0.999
RADIL	-6.23	8	-1.74	0.041	729	0.966	0.959	17202	0.999
DNASE2	-6.23	8	-1.74	0.0411	730	0.966	0.959	17201	0.999
ZNF784	-6.23	8	-1.74	0.0411	731	0.966	0.959	17200	0.999
OLFM1	-6.23	8	-1.74	0.0411	732	0.966	0.959	17199	0.999
EPC1	-6.22	8	-1.74	0.0412	733	0.966	0.959	17198	0.999
WBSCR22	-6.22	8	-1.74	0.0413	734	0.966	0.959	17197	0.999
DLX6	-6.22	8	-1.73	0.0414	735	0.966	0.959	17196	0.999
SELT	-6.21	8	-1.73	0.0415	736	0.966	0.958	17195	0.999
BCL7A	-6.21	8	-1.73	0.0416	737	0.966	0.958	17194	0.999
SIGLEC11	-6.2	8	-1.73	0.0417	738	0.966	0.958	17193	0.999
EXTL3	-6.2	8	-1.73	0.0419	739	0.966	0.958	17192	0.999
GRK5	-6.2	8	-1.73	0.0419	740	0.966	0.958	17191	0.999
IFRD2	-6.2	8	-1.73	0.0419	741	0.966	0.958	17190	0.999
NUP93	-6.2	8	-1.73	0.0419	742	0.966	0.958	17189	0.999
DKC1	-6.19	8	-1.73	0.042	743	0.966	0.958	17188	0.999
SPRR4	-6.19	8	-1.73	0.0421	744	0.966	0.958	17187	0.999
TMED2	-6.18	8	-1.73	0.0422	745	0.966	0.958	17186	0.999
PSMD7	-6.17	8	-1.72	0.0425	746	0.966	0.958	17185	0.999
ACTRT3	-6.17	8	-1.72	0.0426	747	0.966	0.957	17184	0.999
RBBP8	-6.17	8	-1.72	0.0426	748	0.966	0.957	17183	0.999
DCLRE1A	-6.16	8	-1.72	0.0428	749	0.966	0.957	17182	0.999
SEC13	-6.16	8	-1.72	0.0428	750	0.966	0.957	17181	0.999
FYTTD1	-6.16	8	-1.72	0.0429	751	0.966	0.957	17180	0.999
DEFB114	-3.08	2	-1.72	0.043	752	0.966	0.957	17179	0.999
ZFAT	-6.16	8	-1.72	0.043	753	0.966	0.957	17178	0.999
PM20D1	-6.15	8	-1.72	0.0431	754	0.966	0.957	17177	0.999
ALX4	-6.15	8	-1.72	0.0431	755	0.966	0.957	17176	0.999
ASB1	-6.14	8	-1.71	0.0433	756	0.966	0.957	17175	0.999
MXD4	-6.14	8	-1.71	0.0434	757	0.966	0.957	17174	0.999
BAG4	-6.13	8	-1.71	0.0436	758	0.966	0.956	17173	0.999
SOX18	-6.12	8	-1.71	0.0439	759	0.966	0.956	17172	0.998
KPNB1	-6.12	8	-1.71	0.0439	760	0.966	0.956	17171	0.998
QSOX1	-6.12	8	-1.71	0.044	761	0.966	0.956	17170	0.998
FGFBP3	-6.11	8	-1.71	0.0441	762	0.966	0.956	17169	0.998
TBCE	-6.11	8	-1.7	0.0441	763	0.966	0.956	17168	0.998
PLEKHJ1	-6.11	8	-1.7	0.0442	764	0.966	0.956	17167	0.998
JSRP1	-6.1	8	-1.7	0.0443	765	0.966	0.956	17166	0.998
POLR3E	-6.1	8	-1.7	0.0445	766	0.966	0.955	17165	0.998
COBL	-6.09	8	-1.7	0.0446	767	0.966	0.955	17164	0.998
MYOZ1	-6.09	8	-1.7	0.0446	768	0.966	0.955	17163	0.998
VAV2	-6.09	8	-1.7	0.0446	769	0.966	0.955	17162	0.998
DDX59	-5.27	6	-1.7	0.0447	770	0.966	0.955	17161	0.998
EIF1	-4.31	4	-1.7	0.0447	771	0.966	0.955	17160	0.998
EIF4EBP2	-6.09	8	-1.7	0.0448	772	0.966	0.955	17159	0.998
FCRLB	-6.08	8	-1.7	0.045	773	0.966	0.955	17158	0.998
CUEDC2	-6.08	8	-1.69	0.0451	774	0.966	0.955	17157	0.998
OGFOD3	-6.07	8	-1.69	0.0453	775	0.966	0.955	17156	0.998
EXT1	-6.07	8	-1.69	0.0453	776	0.966	0.955	17155	0.998
POLE2	-6.07	8	-1.69	0.0453	777	0.966	0.955	17154	0.998
PSMB2	-6.06	8	-1.69	0.0454	778	0.966	0.955	17153	0.998
EIF1B	-6.06	8	-1.69	0.0455	779	0.966	0.954	17152	0.998
DNAJA4	-6.06	8	-1.69	0.0455	780	0.966	0.954	17151	0.998
DNAJB12	-6.06	8	-1.69	0.0456	781	0.966	0.954	17150	0.998
DDX10	-6.06	8	-1.69	0.0456	782	0.966	0.954	17149	0.998
NABP2	-6.06	8	-1.69	0.0456	783	0.966	0.954	17148	0.998
SNAPC5	-6.05	8	-1.69	0.0457	784	0.966	0.954	17147	0.998
LRRC58	-6.05	8	-1.69	0.0459	785	0.966	0.954	17146	0.998
AES	-6.04	8	-1.68	0.0461	786	0.966	0.954	17145	0.998
RASSF5	-6.04	8	-1.68	0.0462	787	0.966	0.954	17144	0.998
RPF2	-6.03	8	-1.68	0.0463	788	0.966	0.954	17143	0.998
SNAPC4	-6.03	8	-1.68	0.0463	789	0.966	0.954	17142	0.998
GRIN1	-6.03	8	-1.68	0.0463	790	0.966	0.954	17141	0.998
ROMO1	-6.02	8	-1.68	0.0466	791	0.966	0.953	17140	0.997
RPS19BP1	-6.02	8	-1.68	0.0466	792	0.966	0.953	17139	0.997
MEP1A	-6.02	8	-1.68	0.0468	793	0.966	0.953	17138	0.997
LAMC2	-6.01	8	-1.68	0.0468	794	0.966	0.953	17137	0.997
BTBD18	-6.01	8	-1.68	0.0468	795	0.966	0.953	17136	0.997
DDX5	-6	8	-1.67	0.0471	796	0.966	0.953	17135	0.997
NRM	-6	8	-1.67	0.0471	797	0.966	0.953	17134	0.997
DUSP27	-6	8	-1.67	0.0472	798	0.966	0.953	17133	0.997
OR10X1	-6	8	-1.67	0.0472	799	0.966	0.953	17132	0.997
SHFM1	-6	8	-1.67	0.0473	800	0.966	0.953	17131	0.997
SFTPA2	-4.24	4	-1.67	0.0474	801	0.966	0.953	17130	0.997
MKI67	-5.99	8	-1.67	0.0475	802	0.966	0.952	17129	0.997
LAS1L	-5.99	8	-1.67	0.0476	803	0.966	0.952	17128	0.997
PSMA4	-5.98	8	-1.67	0.0476	804	0.966	0.952	17127	0.997
TSFM	-5.98	8	-1.67	0.0477	805	0.966	0.952	17126	0.997
KRT77	-5.98	8	-1.67	0.0477	806	0.966	0.952	17125	0.997
LINGO4	-5.97	8	-1.66	0.0481	807	0.966	0.952	17124	0.997
HSPB7	-5.97	8	-1.66	0.0481	808	0.966	0.952	17123	0.997
DTX2	-5.97	8	-1.66	0.0481	809	0.966	0.952	17122	0.997
ANKMY1	-5.97	8	-1.66	0.0481	810	0.966	0.952	17121	0.997
PPP1R2	-5.97	8	-1.66	0.0482	811	0.966	0.952	17120	0.997
AGT	-5.96	8	-1.66	0.0483	812	0.966	0.952	17119	0.997
LTB	-5.96	8	-1.66	0.0484	813	0.966	0.952	17118	0.997
ZCWPW1	-5.96	8	-1.66	0.0484	814	0.966	0.952	17117	0.997
PSMD8	-5.96	8	-1.66	0.0484	815	0.966	0.952	17116	0.997
ASB14	-5.96	8	-1.66	0.0485	816	0.966	0.952	17115	0.997
ZNF664	-5.95	8	-1.66	0.0486	817	0.966	0.951	17114	0.997
ALOX5	-5.94	8	-1.66	0.0488	818	0.966	0.951	17113	0.997
TMEM39A	-5.94	8	-1.66	0.0488	819	0.966	0.951	17112	0.997
GPR32	-5.94	8	-1.66	0.0489	820	0.966	0.951	17111	0.997
SAMD1	-5.93	8	-1.65	0.0492	821	0.966	0.951	17110	0.996
SFTA2	-5.93	8	-1.65	0.0492	822	0.966	0.951	17109	0.996
TNRC18	-5.93	8	-1.65	0.0492	823	0.966	0.951	17108	0.996
BANP	-5.93	8	-1.65	0.0492	824	0.966	0.951	17107	0.996
COL13A1	-5.93	8	-1.65	0.0493	825	0.966	0.951	17106	0.996
SERP1	-5.93	8	-1.65	0.0493	826	0.966	0.951	17105	0.996
SBNO1	-5.92	8	-1.65	0.0494	827	0.966	0.951	17104	0.996
CNOT2	-5.92	8	-1.65	0.0494	828	0.966	0.951	17103	0.996
AMPD2	-5.92	8	-1.65	0.0495	829	0.966	0.95	17102	0.996
HEMK1	-5.91	8	-1.65	0.0498	830	0.966	0.95	17101	0.996
TADA2B	-5.91	8	-1.65	0.0498	831	0.966	0.95	17100	0.996
RSPH9	-5.91	8	-1.65	0.0499	832	0.966	0.95	17099	0.996
EME2	-5.9	8	-1.65	0.0499	833	0.966	0.95	17098	0.996
NEU1	-5.9	8	-1.64	0.05	834	0.966	0.95	17097	0.996
MED12	-5.9	8	-1.64	0.0502	835	0.966	0.95	17096	0.996
HOMER3	-5.89	8	-1.64	0.0503	836	0.966	0.95	17095	0.996
CCDC120	-5.89	8	-1.64	0.0503	837	0.966	0.95	17094	0.996
RPS29	-4.16	4	-1.64	0.0507	838	0.966	0.949	17093	0.996
SAFB	-5.88	8	-1.64	0.0507	839	0.966	0.949	17092	0.996
NEIL1	-5.87	8	-1.64	0.0509	840	0.966	0.949	17091	0.996
NKAIN1	-5.87	8	-1.64	0.0509	841	0.966	0.949	17090	0.996
GNL3	-5.87	8	-1.63	0.051	842	0.966	0.949	17089	0.996
PLAU	-5.87	8	-1.63	0.0511	843	0.966	0.949	17088	0.996
MBOAT4	-5.87	8	-1.63	0.0511	844	0.966	0.949	17087	0.996
SORBS3	-5.86	8	-1.63	0.0511	845	0.966	0.949	17086	0.996
IQCF5	-5.86	8	-1.63	0.0512	846	0.966	0.949	17085	0.996
RPP14	-5.86	8	-1.63	0.0513	847	0.966	0.949	17084	0.996
MRPL51	-5.86	8	-1.63	0.0514	848	0.966	0.949	17083	0.996
RAB7L1	-5.85	8	-1.63	0.0515	849	0.966	0.949	17082	0.996
ALDH8A1	-5.85	8	-1.63	0.0515	850	0.966	0.948	17081	0.996
PTH1R	-5.85	8	-1.63	0.0515	851	0.966	0.948	17080	0.996
EPAS1	-5.85	8	-1.63	0.0516	852	0.966	0.948	17079	0.996
CIDEA	-5.85	8	-1.63	0.0517	853	0.966	0.948	17078	0.996
PTGER1	-5.85	8	-1.63	0.0517	854	0.966	0.948	17077	0.996
CALHM3	-5.84	8	-1.63	0.0518	855	0.966	0.948	17076	0.996
CALR3	-5.84	8	-1.63	0.0518	856	0.966	0.948	17075	0.996
HERPUD1	-5.84	8	-1.63	0.0519	857	0.966	0.948	17074	0.996
MGST3	-5.84	8	-1.63	0.0519	858	0.966	0.948	17073	0.996
UBQLN4	-5.84	8	-1.63	0.052	859	0.966	0.948	17072	0.996
PBX2	-5.83	8	-1.63	0.052	860	0.966	0.948	17071	0.996
CCDC130	-5.83	8	-1.62	0.0523	861	0.966	0.948	17070	0.995
SMG7	-5.82	8	-1.62	0.0525	862	0.966	0.948	17069	0.995
WSCD2	-5.82	8	-1.62	0.0526	863	0.966	0.947	17068	0.995
PTPRN2	-5.81	8	-1.62	0.0528	864	0.966	0.947	17067	0.995
MED23	-5.81	8	-1.62	0.0528	865	0.966	0.947	17066	0.995
SLC2A14	-2.9	2	-1.62	0.0529	866	0.966	0.947	17065	0.995
ACTL6B	-5.81	8	-1.62	0.0529	867	0.966	0.947	17064	0.995
TLE6	-5.8	8	-1.62	0.053	868	0.966	0.947	17063	0.995
ITIH4	-5.8	8	-1.62	0.0531	869	0.966	0.947	17062	0.995
TRAPPC2L	-5.8	8	-1.62	0.0531	870	0.966	0.947	17061	0.995
ERCC4	-5.8	8	-1.62	0.0531	871	0.966	0.947	17060	0.995
TRIM32	-5.8	8	-1.61	0.0532	872	0.966	0.947	17059	0.995
ARPC5	-5.79	8	-1.61	0.0534	873	0.966	0.947	17058	0.995
ADORA3	-5.79	8	-1.61	0.0534	874	0.966	0.947	17057	0.995
OR4C13	-5.79	8	-1.61	0.0534	875	0.966	0.947	17056	0.995
HOXA7	-5.79	8	-1.61	0.0535	876	0.966	0.947	17055	0.995
FARS2	-5.79	8	-1.61	0.0536	877	0.966	0.946	17054	0.995
PPCDC	-5.78	8	-1.61	0.0536	878	0.966	0.946	17053	0.995
RPL34	-2.89	2	-1.61	0.0537	879	0.966	0.946	17052	0.995
APRT	-5.78	8	-1.61	0.0538	880	0.966	0.946	17051	0.995
DENND1B	-5.78	8	-1.61	0.0538	881	0.966	0.946	17050	0.995
NEK2	-4.08	4	-1.61	0.0539	882	0.966	0.946	17049	0.995
ARF3	-5.77	8	-1.61	0.0539	883	0.966	0.946	17048	0.995
CDKN2AIPNL	-5.77	8	-1.61	0.054	884	0.966	0.946	17047	0.995
VGLL2	-5.77	8	-1.61	0.054	885	0.966	0.946	17046	0.995
JUND	-5.77	8	-1.61	0.054	886	0.966	0.946	17045	0.995
MED17	-5.77	8	-1.61	0.054	887	0.966	0.946	17044	0.995
RXFP4	-5.77	8	-1.61	0.0541	888	0.966	0.946	17043	0.995
POLH	-5.77	8	-1.61	0.0541	889	0.966	0.946	17042	0.995
EDEM2	-5.77	8	-1.61	0.0542	890	0.966	0.946	17041	0.995
BUB1B	-5.76	8	-1.61	0.0542	891	0.966	0.946	17040	0.995
DSCC1	-5.76	8	-1.6	0.0543	892	0.966	0.946	17039	0.995
LSG1	-5.76	8	-1.6	0.0543	893	0.966	0.946	17038	0.995
CCNB2	-5.76	8	-1.6	0.0543	894	0.966	0.946	17037	0.995
PRC1	-5.76	8	-1.6	0.0544	895	0.966	0.946	17036	0.995
CLCF1	-5.75	8	-1.6	0.0546	896	0.966	0.945	17035	0.995
ULBP2	-4.07	4	-1.6	0.0547	897	0.966	0.945	17034	0.995
CGA	-5.75	8	-1.6	0.0548	898	0.966	0.945	17033	0.995
EPHA8	-5.75	8	-1.6	0.0548	899	0.966	0.945	17032	0.995
SLC25A44	-5.74	8	-1.6	0.0549	900	0.966	0.945	17031	0.995
PAEP	-5.74	8	-1.6	0.0549	901	0.966	0.945	17030	0.995
SPTSSA	-5.74	8	-1.6	0.0549	902	0.966	0.945	17029	0.995
CISH	-5.74	8	-1.6	0.0551	903	0.966	0.945	17028	0.995
PNN	-5.74	8	-1.6	0.0551	904	0.966	0.945	17027	0.995
MYL7	-5.74	8	-1.6	0.0551	905	0.966	0.945	17026	0.995
RNF8	-5.74	8	-1.6	0.0552	906	0.966	0.945	17025	0.995
NOB1	-5.73	8	-1.6	0.0553	907	0.966	0.945	17024	0.995
ELP4	-5.73	8	-1.59	0.0555	908	0.966	0.945	17023	0.995
ACACB	-5.72	8	-1.59	0.0556	909	0.966	0.944	17022	0.995
CYP2F1	-5.72	8	-1.59	0.0556	910	0.966	0.944	17021	0.995
ITIH1	-5.72	8	-1.59	0.0558	911	0.966	0.944	17020	0.995
GPR37L1	-5.72	8	-1.59	0.0558	912	0.966	0.944	17019	0.995
RPS27	-2.86	2	-1.59	0.0559	913	0.966	0.944	17018	0.995
CHDH	-5.71	8	-1.59	0.056	914	0.966	0.944	17017	0.995
OR12D2	-5.71	8	-1.59	0.0561	915	0.966	0.944	17016	0.995
PAMR1	-5.71	8	-1.59	0.0561	916	0.966	0.944	17015	0.995
HOXB6	-5.7	8	-1.59	0.0563	917	0.966	0.944	17014	0.995
PRMT1	-5.7	8	-1.59	0.0563	918	0.966	0.944	17013	0.995
TRAK1	-5.7	8	-1.59	0.0564	919	0.966	0.944	17012	0.994
TRNP1	-5.69	8	-1.58	0.0566	920	0.966	0.943	17011	0.994
ADRA1D	-5.69	8	-1.58	0.0566	921	0.966	0.943	17010	0.994
PAK3	-5.69	8	-1.58	0.0567	922	0.966	0.943	17009	0.994
RIOK2	-5.69	8	-1.58	0.0567	923	0.966	0.943	17008	0.994
NCBP2L	-5.69	8	-1.58	0.0568	924	0.966	0.943	17007	0.994
TMEM151B	-5.68	8	-1.58	0.057	925	0.966	0.943	17006	0.994
GNL1	-5.68	8	-1.58	0.0571	926	0.966	0.943	17005	0.994
LRRC73	-5.68	8	-1.58	0.0571	927	0.966	0.943	17004	0.994
RBMX	-2.84	2	-1.58	0.0571	928	0.966	0.943	17003	0.994
IRX6	-5.68	8	-1.58	0.0571	929	0.966	0.943	17002	0.994
C1orf198	-5.67	8	-1.58	0.0571	930	0.966	0.943	17001	0.994
FAM183A	-5.67	8	-1.58	0.0571	931	0.966	0.943	17000	0.994
CRCP	-5.66	8	-1.58	0.0575	932	0.966	0.943	16999	0.994
ARID2	-5.66	8	-1.58	0.0575	933	0.966	0.943	16998	0.994
THOC7	-5.66	8	-1.58	0.0576	934	0.966	0.942	16997	0.994
CENPN	-5.66	8	-1.57	0.0577	935	0.966	0.942	16996	0.994
F3	-5.66	8	-1.57	0.0577	936	0.966	0.942	16995	0.994
BYSL	-5.65	8	-1.57	0.058	937	0.966	0.942	16994	0.994
SGTA	-5.65	8	-1.57	0.058	938	0.966	0.942	16993	0.994
ZNF80	-5.65	8	-1.57	0.0581	939	0.966	0.942	16992	0.994
FIBCD1	-5.64	8	-1.57	0.0583	940	0.966	0.942	16991	0.994
NANOS1	-5.64	8	-1.57	0.0583	941	0.966	0.942	16990	0.994
IZUMO1	-5.63	8	-1.57	0.0586	942	0.966	0.941	16989	0.994
CHST2	-5.63	8	-1.57	0.0586	943	0.966	0.941	16988	0.994
LRRFIP2	-5.63	8	-1.57	0.0586	944	0.966	0.941	16987	0.994
ORC1	-5.63	8	-1.57	0.0586	945	0.966	0.941	16986	0.994
SHC2	-5.63	8	-1.57	0.0588	946	0.966	0.941	16985	0.994
ENTPD7	-5.62	8	-1.56	0.0588	947	0.966	0.941	16984	0.994
MED8	-5.62	8	-1.56	0.0589	948	0.966	0.941	16983	0.994
MRC2	-5.62	8	-1.56	0.059	949	0.966	0.941	16982	0.994
JMJD4	-5.61	8	-1.56	0.0593	950	0.966	0.941	16981	0.993
GPR6	-5.61	8	-1.56	0.0594	951	0.966	0.941	16980	0.993
C9orf96	-5.6	8	-1.56	0.0595	952	0.966	0.941	16979	0.993
RCCD1	-5.6	8	-1.56	0.0597	953	0.966	0.94	16978	0.993
F11R	-5.6	8	-1.56	0.0598	954	0.966	0.94	16977	0.993
AHSA2	-5.6	8	-1.56	0.0598	955	0.966	0.94	16976	0.993
WASF2	-5.59	8	-1.56	0.0599	956	0.966	0.94	16975	0.993
NCAN	-5.59	8	-1.55	0.06	957	0.966	0.94	16974	0.993
BICD1	-5.58	8	-1.55	0.0601	958	0.966	0.94	16973	0.993
RUNX2	-5.58	8	-1.55	0.0603	959	0.966	0.94	16972	0.993
MIA3	-5.58	8	-1.55	0.0603	960	0.966	0.94	16971	0.993
FAM89A	-5.58	8	-1.55	0.0603	961	0.966	0.94	16970	0.993
ADAMTS4	-5.58	8	-1.55	0.0603	962	0.966	0.94	16969	0.993
USHBP1	-5.58	8	-1.55	0.0603	963	0.966	0.94	16968	0.993
BGLAP	-5.58	8	-1.55	0.0605	964	0.966	0.94	16967	0.993
AGAP2	-5.57	8	-1.55	0.0605	965	0.966	0.939	16966	0.993
KRT2	-5.57	8	-1.55	0.0606	966	0.966	0.939	16965	0.993
NDST2	-5.57	8	-1.55	0.0607	967	0.966	0.939	16964	0.993
MRPL19	-5.57	8	-1.55	0.0607	968	0.966	0.939	16963	0.993
TNS1	-5.57	8	-1.55	0.0608	969	0.966	0.939	16962	0.993
TAF1D	-5.57	8	-1.55	0.0608	970	0.966	0.939	16961	0.993
WNT7A	-5.57	8	-1.55	0.0608	971	0.966	0.939	16960	0.993
ESYT2	-5.56	8	-1.55	0.0609	972	0.966	0.939	16959	0.993
URB2	-5.56	8	-1.55	0.0609	973	0.966	0.939	16958	0.993
B3GNT4	-5.2	7	-1.55	0.0611	974	0.966	0.939	16957	0.993
FBP2	-5.55	8	-1.54	0.0613	975	0.966	0.939	16956	0.993
DHX30	-5.55	8	-1.54	0.0614	976	0.966	0.939	16955	0.993
NAAA	-5.55	8	-1.54	0.0615	977	0.966	0.939	16954	0.993
PLB1	-5.55	8	-1.54	0.0615	978	0.966	0.939	16953	0.993
SGK1	-4.8	6	-1.54	0.0616	979	0.966	0.938	16952	0.993
F13B	-5.54	8	-1.54	0.0616	980	0.966	0.938	16951	0.993
WWTR1	-5.54	8	-1.54	0.0617	981	0.966	0.938	16950	0.993
UCHL5	-5.54	8	-1.54	0.0618	982	0.966	0.938	16949	0.993
UTP6	-5.54	8	-1.54	0.0618	983	0.966	0.938	16948	0.993
ZSCAN9	-5.54	8	-1.54	0.0619	984	0.966	0.938	16947	0.993
CMTR1	-5.53	8	-1.54	0.062	985	0.966	0.938	16946	0.993
FGF17	-5.53	8	-1.54	0.0621	986	0.966	0.938	16945	0.992
SSR2	-5.53	8	-1.54	0.0621	987	0.966	0.938	16944	0.992
ADC	-5.52	8	-1.54	0.0623	988	0.966	0.938	16943	0.992
SUPT5H	-5.52	8	-1.53	0.0625	989	0.966	0.937	16942	0.992
PDCD7	-5.52	8	-1.53	0.0626	990	0.966	0.937	16941	0.992
UTP14A	-5.51	8	-1.53	0.0627	991	0.966	0.937	16940	0.992
KIAA0319L	-5.51	8	-1.53	0.0628	992	0.966	0.937	16939	0.992
SLC41A1	-5.51	8	-1.53	0.0628	993	0.966	0.937	16938	0.992
CHML	-5.5	8	-1.53	0.0629	994	0.966	0.937	16937	0.992
EBNA1BP2	-5.15	7	-1.53	0.063	995	0.966	0.937	16936	0.992
PLXNB3	-5.5	8	-1.53	0.063	996	0.966	0.937	16935	0.992
ISCU	-5.5	8	-1.53	0.063	997	0.966	0.937	16934	0.992
MSTO1	-5.5	8	-1.53	0.0631	998	0.966	0.937	16933	0.992
SLURP1	-5.5	8	-1.53	0.0632	999	0.966	0.937	16932	0.992
C12orf65	-5.5	8	-1.53	0.0633	1000	0.966	0.937	16931	0.992
C1orf105	-5.5	8	-1.53	0.0633	1001	0.966	0.937	16930	0.992
CARM1	-5.49	8	-1.53	0.0635	1002	0.966	0.937	16929	0.992
C16orf96	-5.48	8	-1.52	0.0639	1003	0.966	0.936	16928	0.992
HARS	-5.47	8	-1.52	0.064	1004	0.966	0.936	16927	0.991
EXOSC8	-5.47	8	-1.52	0.064	1005	0.966	0.936	16926	0.991
MEGF11	-5.47	8	-1.52	0.0641	1006	0.966	0.936	16925	0.991
PNRC2	-5.47	8	-1.52	0.0641	1007	0.966	0.936	16924	0.991
RBPMS	-5.47	8	-1.52	0.0642	1008	0.966	0.936	16923	0.991
TMEM179B	-5.46	8	-1.52	0.0644	1009	0.966	0.936	16922	0.991
LRRC71	-5.46	8	-1.52	0.0646	1010	0.966	0.935	16921	0.991
FAM76A	-5.46	8	-1.52	0.0647	1011	0.966	0.935	16920	0.991
TMPRSS5	-5.46	8	-1.52	0.0647	1012	0.966	0.935	16919	0.991
RACGAP1	-5.45	8	-1.52	0.0647	1013	0.966	0.935	16918	0.991
CD300C	-5.45	8	-1.52	0.0648	1014	0.966	0.935	16917	0.991
FLCN	-5.45	8	-1.52	0.0648	1015	0.966	0.935	16916	0.991
EXOC3L1	-5.45	8	-1.51	0.065	1016	0.966	0.935	16915	0.991
HIST1H3F	-5.45	8	-1.51	0.065	1017	0.966	0.935	16914	0.991
OPN1SW	-5.44	8	-1.51	0.0652	1018	0.966	0.935	16913	0.991
GNRH2	-5.44	8	-1.51	0.0653	1019	0.966	0.935	16912	0.991
C22orf26	-5.43	8	-1.51	0.0655	1020	0.966	0.935	16911	0.991
KDM2B	-5.43	8	-1.51	0.0655	1021	0.966	0.934	16910	0.991
LTB4R2	-5.43	8	-1.51	0.0658	1022	0.966	0.934	16909	0.991
CDC25A	-5.43	8	-1.51	0.0658	1023	0.966	0.934	16908	0.991
ZNF488	-5.42	8	-1.51	0.066	1024	0.966	0.934	16907	0.991
ATP6V0C	-5.42	8	-1.51	0.066	1025	0.966	0.934	16906	0.991
GPR161	-5.42	8	-1.51	0.0661	1026	0.966	0.934	16905	0.991
PLEKHG4B	-5.41	8	-1.5	0.0663	1027	0.966	0.934	16904	0.99
RRP7A	-5.41	8	-1.5	0.0665	1028	0.966	0.933	16903	0.99
WBSCR16	-5.4	8	-1.5	0.0666	1029	0.966	0.933	16902	0.99
CCDC59	-5.4	8	-1.5	0.0666	1030	0.966	0.933	16901	0.99
ATXN7L1	-5.4	8	-1.5	0.0666	1031	0.966	0.933	16900	0.99
GPR149	-5.4	8	-1.5	0.0667	1032	0.966	0.933	16899	0.99
TMEM81	-5.4	8	-1.5	0.0667	1033	0.966	0.933	16898	0.99
KMT2C	-5.4	8	-1.5	0.0667	1034	0.966	0.933	16897	0.99
PTHLH	-5.4	8	-1.5	0.0667	1035	0.966	0.933	16896	0.99
SIKE1	-5.4	8	-1.5	0.0667	1036	0.966	0.933	16895	0.99
TMEM59L	-5.4	8	-1.5	0.0667	1037	0.966	0.933	16894	0.99
STX11	-5.4	8	-1.5	0.0668	1038	0.966	0.933	16893	0.99
FASLG	-5.4	8	-1.5	0.0668	1039	0.966	0.933	16892	0.99
MRTO4	-5.4	8	-1.5	0.0669	1040	0.966	0.933	16891	0.99
DOCK1	-5.4	8	-1.5	0.0669	1041	0.966	0.933	16890	0.99
FEZF1	-5.4	8	-1.5	0.0669	1042	0.966	0.933	16889	0.99
AFG3L2	-5.4	8	-1.5	0.0669	1043	0.966	0.933	16888	0.99
SPCS2	-5.39	8	-1.5	0.067	1044	0.966	0.933	16887	0.99
PGLYRP3	-5.39	8	-1.5	0.0673	1045	0.966	0.933	16886	0.99
RPA3	-5.38	8	-1.5	0.0674	1046	0.966	0.933	16885	0.99
OR6N2	-5.38	8	-1.49	0.0675	1047	0.966	0.933	16884	0.99
C8orf59	-2.69	2	-1.49	0.0675	1048	0.966	0.932	16883	0.99
NONO	-5.38	8	-1.49	0.0676	1049	0.966	0.932	16882	0.99
DDX47	-5.38	8	-1.49	0.0676	1050	0.966	0.932	16881	0.99
MRPL55	-5.38	8	-1.49	0.0676	1051	0.966	0.932	16880	0.99
P2RX2	-5.37	8	-1.49	0.0678	1052	0.966	0.932	16879	0.99
PRKRIP1	-5.37	8	-1.49	0.0678	1053	0.966	0.932	16878	0.99
SNAP47	-5.37	8	-1.49	0.0679	1054	0.966	0.932	16877	0.99
CMTM6	-5.37	8	-1.49	0.0679	1055	0.966	0.932	16876	0.99
KRR1	-5.37	8	-1.49	0.068	1056	0.966	0.932	16875	0.99
ZSCAN5A	-5.36	8	-1.49	0.0682	1057	0.966	0.932	16874	0.99
PFN2	-5.35	8	-1.49	0.0685	1058	0.966	0.932	16873	0.99
MRPL11	-5.35	8	-1.49	0.0685	1059	0.966	0.931	16872	0.99
KHSRP	-5.35	8	-1.49	0.0686	1060	0.966	0.931	16871	0.99
UBAP2L	-5.35	8	-1.49	0.0686	1061	0.966	0.931	16870	0.99
TSTD1	-5.35	8	-1.49	0.0687	1062	0.966	0.931	16869	0.99
ACBD3	-5.35	8	-1.49	0.0687	1063	0.966	0.931	16868	0.99
MRPL20	-5.34	8	-1.48	0.0688	1064	0.966	0.931	16867	0.99
SULF1	-5.34	8	-1.48	0.0689	1065	0.966	0.931	16866	0.99
RNF115	-5.34	8	-1.48	0.069	1066	0.966	0.931	16865	0.99
RAC1	-5.34	8	-1.48	0.0691	1067	0.966	0.931	16864	0.99
BAALC	-5.34	8	-1.48	0.0691	1068	0.966	0.931	16863	0.99
RBM15	-5.34	8	-1.48	0.0691	1069	0.966	0.931	16862	0.99
SLC2A2	-5.34	8	-1.48	0.0692	1070	0.966	0.931	16861	0.99
INHBC	-5.33	8	-1.48	0.0693	1071	0.966	0.931	16860	0.99
ATP2A2	-5.33	8	-1.48	0.0693	1072	0.966	0.931	16859	0.99
DNAJB1	-5.33	8	-1.48	0.0694	1073	0.966	0.931	16858	0.99
SMNDC1	-5.33	8	-1.48	0.0694	1074	0.966	0.931	16857	0.99
CENPP	-5.33	8	-1.48	0.0695	1075	0.966	0.931	16856	0.99
PHF21B	-5.33	8	-1.48	0.0695	1076	0.966	0.931	16855	0.99
MARK1	-5.33	8	-1.48	0.0695	1077	0.966	0.93	16854	0.99
OXT	-5.33	8	-1.48	0.0696	1078	0.966	0.93	16853	0.99
PHB	-5.32	8	-1.48	0.0696	1079	0.966	0.93	16852	0.99
TMEM105	-5.32	8	-1.48	0.0697	1080	0.966	0.93	16851	0.99
GPRIN2	-5.32	8	-1.48	0.0697	1081	0.966	0.93	16850	0.99
SPICE1	-5.32	8	-1.48	0.0699	1082	0.966	0.93	16849	0.99
XXYLT1	-5.32	8	-1.48	0.07	1083	0.966	0.93	16848	0.99
GATA6	-4.97	7	-1.48	0.07	1084	0.966	0.93	16847	0.99
SYNPO2L	-5.31	8	-1.48	0.0701	1085	0.966	0.93	16846	0.99
GYG1	-5.31	8	-1.48	0.0701	1086	0.966	0.93	16845	0.99
ABHD6	-5.31	8	-1.47	0.0703	1087	0.966	0.93	16844	0.99
EMC3	-5.3	8	-1.47	0.0704	1088	0.966	0.93	16843	0.99
KLHL25	-5.3	8	-1.47	0.0704	1089	0.966	0.93	16842	0.99
ALS2CL	-5.3	8	-1.47	0.0704	1090	0.966	0.93	16841	0.99
URB1	-5.3	8	-1.47	0.0706	1091	0.966	0.929	16840	0.99
H2AFJ	-5.29	8	-1.47	0.0708	1092	0.966	0.929	16839	0.989
PTPRU	-5.29	8	-1.47	0.0708	1093	0.966	0.929	16838	0.989
KLF2	-5.29	8	-1.47	0.0709	1094	0.966	0.929	16837	0.989
TAF5	-5.29	8	-1.47	0.0709	1095	0.966	0.929	16836	0.989
CLIP3	-5.29	8	-1.47	0.0711	1096	0.966	0.929	16835	0.989
FILIP1	-5.29	8	-1.47	0.0711	1097	0.966	0.929	16834	0.989
GSPT1	-5.29	8	-1.47	0.0711	1098	0.966	0.929	16833	0.989
MTCH1	-5.28	8	-1.47	0.0711	1099	0.966	0.929	16832	0.989
AGAP1	-5.28	8	-1.47	0.0713	1100	0.966	0.929	16831	0.989
C4B	-2.64	2	-1.47	0.0714	1101	0.966	0.929	16830	0.989
DNAJC11	-5.28	8	-1.46	0.0715	1102	0.966	0.929	16829	0.989
NDOR1	-5.28	8	-1.46	0.0715	1103	0.966	0.929	16828	0.989
LHX3	-5.27	8	-1.46	0.0716	1104	0.966	0.928	16827	0.989
MYBPH	-5.27	8	-1.46	0.0717	1105	0.966	0.928	16826	0.989
AFMID	-5.27	8	-1.46	0.0718	1106	0.966	0.928	16825	0.989
GPR132	-5.27	8	-1.46	0.0718	1107	0.966	0.928	16824	0.989
TPGS1	-5.26	8	-1.46	0.072	1108	0.966	0.928	16823	0.989
SHISA4	-5.26	8	-1.46	0.072	1109	0.966	0.928	16822	0.989
SPRED1	-5.26	8	-1.46	0.0723	1110	0.966	0.928	16821	0.989
CD247	-5.25	8	-1.46	0.0724	1111	0.966	0.928	16820	0.989
CD300LG	-5.25	8	-1.46	0.0724	1112	0.966	0.928	16819	0.989
KCTD3	-5.25	8	-1.46	0.0725	1113	0.966	0.928	16818	0.989
KLHL30	-5.25	8	-1.46	0.0726	1114	0.966	0.927	16817	0.989
DVL1	-5.25	8	-1.46	0.0726	1115	0.966	0.927	16816	0.989
ARCN1	-5.25	8	-1.46	0.0727	1116	0.966	0.927	16815	0.989
DEFA5	-5.25	8	-1.46	0.0727	1117	0.966	0.927	16814	0.989
CHAF1A	-5.24	8	-1.46	0.0727	1118	0.966	0.927	16813	0.989
HIC2	-5.24	8	-1.46	0.0728	1119	0.966	0.927	16812	0.989
CCDC37	-5.24	8	-1.46	0.0728	1120	0.966	0.927	16811	0.989
RPS21	-5.24	8	-1.45	0.0729	1121	0.966	0.927	16810	0.989
LAMB3	-5.24	8	-1.45	0.073	1122	0.966	0.927	16809	0.989
ELP5	-5.24	8	-1.45	0.073	1123	0.966	0.927	16808	0.989
CCT2	-5.24	8	-1.45	0.073	1124	0.966	0.927	16807	0.989
STXBP1	-5.24	8	-1.45	0.0731	1125	0.966	0.927	16806	0.989
TIMM10B	-5.23	8	-1.45	0.0731	1126	0.966	0.927	16805	0.989
RAB43	-5.23	8	-1.45	0.0731	1127	0.966	0.927	16804	0.989
SRRM3	-5.23	8	-1.45	0.0731	1128	0.966	0.927	16803	0.989
TDRKH	-5.23	8	-1.45	0.0735	1129	0.966	0.927	16802	0.989
ACTA1	-5.22	8	-1.45	0.0735	1130	0.966	0.926	16801	0.989
NUDT13	-5.22	8	-1.45	0.0735	1131	0.966	0.926	16800	0.989
SKOR1	-5.22	8	-1.45	0.0738	1132	0.966	0.926	16799	0.989
LATS2	-5.22	8	-1.45	0.0738	1133	0.966	0.926	16798	0.989
HRK	-5.21	8	-1.45	0.074	1134	0.966	0.926	16797	0.988
MRPS17	-5.21	8	-1.45	0.0741	1135	0.966	0.926	16796	0.988
GCLC	-5.21	8	-1.45	0.0742	1136	0.966	0.926	16795	0.988
ATP5D	-5.21	8	-1.45	0.0742	1137	0.966	0.926	16794	0.988
MKI67IP	-4.51	6	-1.44	0.0743	1138	0.966	0.926	16793	0.988
PPP1R11	-5.2	8	-1.44	0.0746	1139	0.966	0.925	16792	0.988
SMPDL3B	-5.19	8	-1.44	0.0747	1140	0.966	0.925	16791	0.988
GNMT	-5.19	8	-1.44	0.0747	1141	0.966	0.925	16790	0.988
DNAJB2	-5.19	8	-1.44	0.0747	1142	0.966	0.925	16789	0.988
ZFYVE20	-5.19	8	-1.44	0.0748	1143	0.966	0.925	16788	0.988
ACTR1A	-5.19	8	-1.44	0.0749	1144	0.966	0.925	16787	0.988
ENO1	-5.19	8	-1.44	0.075	1145	0.966	0.925	16786	0.988
TCEANC2	-5.19	8	-1.44	0.0751	1146	0.966	0.925	16785	0.988
THOC1	-5.18	8	-1.44	0.0752	1147	0.966	0.925	16784	0.988
MAGI3	-5.18	8	-1.44	0.0753	1148	0.966	0.925	16783	0.988
VANGL2	-5.18	8	-1.44	0.0753	1149	0.966	0.925	16782	0.988
NPFF	-5.18	8	-1.44	0.0753	1150	0.966	0.925	16781	0.988
CTNNBIP1	-5.18	8	-1.44	0.0754	1151	0.966	0.925	16780	0.988
SLC35G1	-5.18	8	-1.44	0.0754	1152	0.966	0.925	16779	0.988
RDH12	-5.18	8	-1.44	0.0754	1153	0.966	0.925	16778	0.988
TPM3	-5.18	8	-1.44	0.0755	1154	0.966	0.925	16777	0.988
SBDS	-5.17	8	-1.44	0.0756	1155	0.966	0.924	16776	0.988
PDE4C	-5.17	8	-1.43	0.0757	1156	0.966	0.924	16775	0.988
RUNX3	-5.17	8	-1.43	0.0757	1157	0.966	0.924	16774	0.988
CDCA5	-5.17	8	-1.43	0.0759	1158	0.966	0.924	16773	0.988
PRUNE	-5.16	8	-1.43	0.0759	1159	0.966	0.924	16772	0.988
RC3H1	-5.16	8	-1.43	0.0759	1160	0.966	0.924	16771	0.988
TMEM30A	-5.16	8	-1.43	0.0761	1161	0.966	0.924	16770	0.988
CCR10	-5.16	8	-1.43	0.0762	1162	0.966	0.924	16769	0.988
IGFBP2	-5.15	8	-1.43	0.0764	1163	0.966	0.924	16768	0.988
C3orf83	-5.15	8	-1.43	0.0765	1164	0.966	0.924	16767	0.988
MFN1	-5.15	8	-1.43	0.0765	1165	0.966	0.923	16766	0.988
CD1B	-5.15	8	-1.43	0.0767	1166	0.966	0.923	16765	0.987
TPT1	-5.15	8	-1.43	0.0767	1167	0.966	0.923	16764	0.987
PTCHD4	-5.14	8	-1.43	0.0768	1168	0.966	0.923	16763	0.987
KCNK15	-5.14	8	-1.43	0.0769	1169	0.966	0.923	16762	0.987
IL12RB1	-5.14	8	-1.43	0.0769	1170	0.966	0.923	16761	0.987
ENSA	-5.14	8	-1.42	0.0771	1171	0.966	0.923	16760	0.987
HBP1	-5.14	8	-1.42	0.0771	1172	0.966	0.923	16759	0.987
ANKRD6	-5.13	8	-1.42	0.0773	1173	0.966	0.923	16758	0.987
EMP3	-5.13	8	-1.42	0.0774	1174	0.966	0.923	16757	0.987
PRSS27	-5.13	8	-1.42	0.0774	1175	0.966	0.923	16756	0.987
ACTN2	-5.13	8	-1.42	0.0774	1176	0.966	0.923	16755	0.987
FZD3	-5.13	8	-1.42	0.0774	1177	0.966	0.923	16754	0.987
UPF3B	-5.13	8	-1.42	0.0774	1178	0.966	0.923	16753	0.987
LIN54	-5.13	8	-1.42	0.0774	1179	0.966	0.923	16752	0.987
C1orf74	-5.13	8	-1.42	0.0775	1180	0.966	0.922	16751	0.987
MAGOH	-5.13	8	-1.42	0.0776	1181	0.966	0.922	16750	0.987
S100A9	-5.13	8	-1.42	0.0776	1182	0.966	0.922	16749	0.987
IQCF3	-5.12	8	-1.42	0.0776	1183	0.966	0.922	16748	0.987
CRTC3	-5.12	8	-1.42	0.0776	1184	0.966	0.922	16747	0.987
GPR26	-5.12	8	-1.42	0.0778	1185	0.966	0.922	16746	0.987
PDCL3	-5.11	8	-1.42	0.078	1186	0.966	0.922	16745	0.987
C11orf52	-5.11	8	-1.42	0.0781	1187	0.966	0.922	16744	0.987
VAT1L	-5.11	8	-1.42	0.0781	1188	0.966	0.922	16743	0.987
POU1F1	-5.11	8	-1.42	0.0781	1189	0.966	0.922	16742	0.987
PDPK1	-5.11	8	-1.42	0.0783	1190	0.966	0.922	16741	0.987
LRRC16A	-5.11	8	-1.42	0.0783	1191	0.966	0.922	16740	0.987
RBM15B	-5.1	8	-1.41	0.0786	1192	0.966	0.921	16739	0.987
MAPK1	-5.1	8	-1.41	0.0786	1193	0.966	0.921	16738	0.987
DDX23	-5.1	8	-1.41	0.0787	1194	0.966	0.921	16737	0.987
SNRPE	-2.55	2	-1.41	0.0788	1195	0.966	0.921	16736	0.987
FBXO5	-5.09	8	-1.41	0.0789	1196	0.966	0.921	16735	0.987
ZNF132	-5.09	8	-1.41	0.079	1197	0.966	0.921	16734	0.987
SELENBP1	-5.09	8	-1.41	0.079	1198	0.966	0.921	16733	0.987
ZNF503	-5.09	8	-1.41	0.0791	1199	0.966	0.921	16732	0.987
NDUFC1	-5.08	8	-1.41	0.0793	1200	0.966	0.921	16731	0.987
CENPT	-5.08	8	-1.41	0.0794	1201	0.966	0.921	16730	0.987
SUPT16H	-5.08	8	-1.41	0.0795	1202	0.966	0.921	16729	0.987
ZNF195	-5.08	8	-1.41	0.0795	1203	0.966	0.92	16728	0.987
CAMK1G	-5.08	8	-1.41	0.0796	1204	0.966	0.92	16727	0.987
CLOCK	-5.07	8	-1.41	0.0797	1205	0.966	0.92	16726	0.987
RHBG	-5.07	8	-1.41	0.0798	1206	0.966	0.92	16725	0.987
WDR5	-5.07	8	-1.41	0.0799	1207	0.966	0.92	16724	0.986
HMCN1	-5.07	8	-1.41	0.0799	1208	0.966	0.92	16723	0.986
PFKP	-5.07	8	-1.41	0.0799	1209	0.966	0.92	16722	0.986
COMTD1	-5.07	8	-1.4	0.0801	1210	0.966	0.92	16721	0.986
CAPNS1	-5.07	8	-1.4	0.0801	1211	0.966	0.92	16720	0.986
ADCY6	-5.06	8	-1.4	0.0801	1212	0.966	0.92	16719	0.986
NCAPD2	-5.06	8	-1.4	0.0802	1213	0.966	0.92	16718	0.986
MAPKAP1	-5.06	8	-1.4	0.0802	1214	0.966	0.92	16717	0.986
GFM1	-5.06	8	-1.4	0.0803	1215	0.966	0.92	16716	0.986
ZNF726	-5.06	8	-1.4	0.0805	1216	0.966	0.919	16715	0.986
ZFYVE19	-5.05	8	-1.4	0.0806	1217	0.966	0.919	16714	0.986
EIF1AX	-5.05	8	-1.4	0.0807	1218	0.966	0.919	16713	0.986
ITGAV	-5.05	8	-1.4	0.0807	1219	0.966	0.919	16712	0.986
TKT	-5.05	8	-1.4	0.081	1220	0.966	0.919	16711	0.986
CCHCR1	-5.04	8	-1.4	0.081	1221	0.966	0.919	16710	0.986
TFF1	-5.04	8	-1.4	0.081	1222	0.966	0.919	16709	0.986
TNNT2	-5.04	8	-1.4	0.0811	1223	0.966	0.919	16708	0.986
SMURF2	-5.04	8	-1.4	0.0811	1224	0.966	0.919	16707	0.986
C6orf136	-5.04	8	-1.4	0.0811	1225	0.966	0.919	16706	0.986
MOS	-5.04	8	-1.4	0.0811	1226	0.966	0.919	16705	0.986
PFDN2	-5.04	8	-1.4	0.0811	1227	0.966	0.919	16704	0.986
KEAP1	-5.04	8	-1.4	0.0811	1228	0.966	0.919	16703	0.986
TAF1	-5.04	8	-1.4	0.0811	1229	0.966	0.919	16702	0.986
ACTR10	-5.04	8	-1.4	0.0813	1230	0.966	0.919	16701	0.986
CD40	-5.04	8	-1.4	0.0814	1231	0.966	0.919	16700	0.986
DRD3	-5.03	8	-1.39	0.0815	1232	0.966	0.918	16699	0.986
EFCAB12	-5.03	8	-1.39	0.0816	1233	0.966	0.918	16698	0.986
SAP30BP	-4.36	6	-1.39	0.0817	1234	0.966	0.918	16697	0.986
GPAA1	-5.03	8	-1.39	0.0817	1235	0.966	0.918	16696	0.986
C1orf227	-5.02	8	-1.39	0.0819	1236	0.966	0.918	16695	0.986
CKAP4	-5.02	8	-1.39	0.0819	1237	0.966	0.918	16694	0.986
LIN28B	-5.02	8	-1.39	0.0819	1238	0.966	0.918	16693	0.986
RAB11FIP3	-5.02	8	-1.39	0.0819	1239	0.966	0.918	16692	0.986
TTC9	-5.02	8	-1.39	0.082	1240	0.966	0.918	16691	0.986
LSM11	-5.02	8	-1.39	0.0821	1241	0.966	0.918	16690	0.986
ALDH18A1	-5.02	8	-1.39	0.0822	1242	0.966	0.918	16689	0.986
GAB1	-5.02	8	-1.39	0.0822	1243	0.966	0.918	16688	0.986
HNRNPR	-5.01	8	-1.39	0.0823	1244	0.966	0.918	16687	0.986
OAF	-5.01	8	-1.39	0.0825	1245	0.966	0.918	16686	0.986
CDK20	-5.01	8	-1.39	0.0826	1246	0.966	0.917	16685	0.986
DNA2	-5.01	8	-1.39	0.0827	1247	0.966	0.917	16684	0.986
CNN2	-5.01	8	-1.39	0.0827	1248	0.966	0.917	16683	0.986
C1orf86	-5	8	-1.39	0.0829	1249	0.966	0.917	16682	0.986
ZDHHC4	-5	8	-1.38	0.0831	1250	0.966	0.917	16681	0.986
VARS2	-5	8	-1.38	0.0831	1251	0.966	0.917	16680	0.986
TIE1	-5	8	-1.38	0.0831	1252	0.966	0.917	16679	0.986
GNAI2	-5	8	-1.38	0.0831	1253	0.966	0.917	16678	0.986
PTK7	-5	8	-1.38	0.0831	1254	0.966	0.917	16677	0.986
MUC4	-5	8	-1.38	0.0832	1255	0.966	0.917	16676	0.986
KIF15	-4.99	8	-1.38	0.0832	1256	0.966	0.917	16675	0.986
TPD52L1	-4.99	8	-1.38	0.0832	1257	0.966	0.917	16674	0.986
ANXA13	-4.99	8	-1.38	0.0833	1258	0.966	0.917	16673	0.986
C1QTNF8	-4.99	8	-1.38	0.0833	1259	0.966	0.917	16672	0.986
TMEM222	-4.99	8	-1.38	0.0833	1260	0.966	0.917	16671	0.986
KIAA1683	-4.99	8	-1.38	0.0835	1261	0.966	0.917	16670	0.986
PARL	-4.99	8	-1.38	0.0835	1262	0.966	0.916	16669	0.986
TOMM6	-4.99	8	-1.38	0.0835	1263	0.966	0.916	16668	0.986
FAM92A1	-4.98	8	-1.38	0.0836	1264	0.966	0.916	16667	0.986
FABP3	-4.98	8	-1.38	0.0837	1265	0.966	0.916	16666	0.986
SFXN2	-4.98	8	-1.38	0.0838	1266	0.966	0.916	16665	0.986
TOR1B	-4.98	8	-1.38	0.0838	1267	0.966	0.916	16664	0.986
RGS13	-4.98	8	-1.38	0.0839	1268	0.966	0.916	16663	0.986
DPY19L2	-4.98	8	-1.38	0.084	1269	0.966	0.916	16662	0.986
COL1A2	-4.97	8	-1.38	0.0842	1270	0.966	0.916	16661	0.986
PFDN5	-4.97	8	-1.38	0.0842	1271	0.966	0.916	16660	0.986
CYP39A1	-4.97	8	-1.38	0.0842	1272	0.966	0.916	16659	0.986
NDUFB2	-4.97	8	-1.38	0.0843	1273	0.966	0.916	16658	0.986
PIGQ	-4.97	8	-1.38	0.0843	1274	0.966	0.916	16657	0.986
HCLS1	-4.97	8	-1.38	0.0844	1275	0.966	0.916	16656	0.986
CEBPA	-4.97	8	-1.38	0.0845	1276	0.966	0.916	16655	0.986
PLCZ1	-4.96	8	-1.38	0.0845	1277	0.966	0.916	16654	0.986
MRPS18A	-4.96	8	-1.37	0.0847	1278	0.966	0.915	16653	0.985
TMEM106C	-4.96	8	-1.37	0.0847	1279	0.966	0.915	16652	0.985
R3HCC1	-4.95	8	-1.37	0.0849	1280	0.966	0.915	16651	0.985
TRIAP1	-4.95	8	-1.37	0.085	1281	0.966	0.915	16650	0.985
RIOK1	-4.95	8	-1.37	0.085	1282	0.966	0.915	16649	0.985
LIX1L	-4.95	8	-1.37	0.0851	1283	0.966	0.915	16648	0.985
TDGF1	-4.95	8	-1.37	0.0851	1284	0.966	0.915	16647	0.985
NOP9	-4.95	8	-1.37	0.0851	1285	0.966	0.915	16646	0.985
MPC2	-4.95	8	-1.37	0.0852	1286	0.966	0.915	16645	0.985
DAP3	-4.95	8	-1.37	0.0852	1287	0.966	0.915	16644	0.985
IQCF2	-4.94	8	-1.37	0.0855	1288	0.966	0.914	16643	0.985
POGK	-4.94	8	-1.37	0.0856	1289	0.966	0.914	16642	0.985
C4BPB	-4.94	8	-1.37	0.0857	1290	0.966	0.914	16641	0.985
MVD	-4.94	8	-1.37	0.0857	1291	0.966	0.914	16640	0.985
CAAP1	-4.94	8	-1.37	0.0858	1292	0.966	0.914	16639	0.985
GNAZ	-4.94	8	-1.37	0.0858	1293	0.966	0.914	16638	0.985
MFSD3	-4.93	8	-1.36	0.0862	1294	0.966	0.914	16637	0.985
YOD1	-4.93	8	-1.36	0.0862	1295	0.966	0.914	16636	0.985
PDC	-4.93	8	-1.36	0.0862	1296	0.966	0.914	16635	0.985
GDF5OS	-4.93	8	-1.36	0.0863	1297	0.966	0.914	16634	0.985
POMC	-4.92	8	-1.36	0.0863	1298	0.966	0.914	16633	0.985
FARSA	-4.92	8	-1.36	0.0865	1299	0.966	0.914	16632	0.985
TPRA1	-4.92	8	-1.36	0.0865	1300	0.966	0.914	16631	0.985
MRPL34	-4.92	8	-1.36	0.0865	1301	0.966	0.913	16630	0.985
NCAPH	-4.92	8	-1.36	0.0866	1302	0.966	0.913	16629	0.985
FAM178A	-4.92	8	-1.36	0.0866	1303	0.966	0.913	16628	0.985
EIF4E1B	-4.91	8	-1.36	0.0868	1304	0.966	0.913	16627	0.985
NODAL	-4.91	8	-1.36	0.0868	1305	0.966	0.913	16626	0.985
SLC30A2	-4.91	8	-1.36	0.0869	1306	0.966	0.913	16625	0.985
VCPIP1	-4.91	8	-1.36	0.0869	1307	0.966	0.913	16624	0.985
ANP32B	-4.91	8	-1.36	0.0871	1308	0.966	0.913	16623	0.985
SUCO	-4.9	8	-1.36	0.0873	1309	0.966	0.913	16622	0.985
PIWIL2	-4.9	8	-1.36	0.0875	1310	0.966	0.912	16621	0.984
GPANK1	-4.9	8	-1.36	0.0876	1311	0.966	0.912	16620	0.984
CDK2	-4.89	8	-1.35	0.0878	1312	0.966	0.912	16619	0.984
FAM71F1	-4.89	8	-1.35	0.0879	1313	0.966	0.912	16618	0.984
PBLD	-4.89	8	-1.35	0.0879	1314	0.966	0.912	16617	0.984
P2RY11	-2.44	2	-1.35	0.088	1315	0.966	0.912	16616	0.984
NPPC	-4.88	8	-1.35	0.0881	1316	0.966	0.912	16615	0.984
AKR1C4	-3.45	4	-1.35	0.0882	1317	0.966	0.912	16614	0.984
NUPL1	-4.88	8	-1.35	0.0884	1318	0.966	0.912	16613	0.984
FCN3	-4.88	8	-1.35	0.0884	1319	0.966	0.912	16612	0.984
TBX18	-4.88	8	-1.35	0.0885	1320	0.966	0.911	16611	0.984
HIP1	-4.87	8	-1.35	0.0886	1321	0.966	0.911	16610	0.984
RPA1	-4.87	8	-1.35	0.0887	1322	0.966	0.911	16609	0.984
SLC39A3	-4.87	8	-1.35	0.0888	1323	0.966	0.911	16608	0.984
ZNF782	-4.87	8	-1.35	0.0888	1324	0.966	0.911	16607	0.984
TAS2R13	-4.87	8	-1.35	0.0888	1325	0.966	0.911	16606	0.984
INSRR	-4.87	8	-1.35	0.0889	1326	0.966	0.911	16605	0.984
CCDC36	-4.87	8	-1.35	0.0889	1327	0.966	0.911	16604	0.984
PCBP4	-4.86	8	-1.35	0.0891	1328	0.966	0.911	16603	0.984
GGCX	-4.86	8	-1.35	0.0892	1329	0.966	0.911	16602	0.984
EMILIN3	-4.86	8	-1.34	0.0893	1330	0.966	0.911	16601	0.984
USP42	-4.85	8	-1.34	0.0895	1331	0.966	0.91	16600	0.983
EIF4H	-4.85	8	-1.34	0.0896	1332	0.966	0.91	16599	0.983
ZNF197	-4.85	8	-1.34	0.0896	1333	0.966	0.91	16598	0.983
ZBTB18	-4.85	8	-1.34	0.0897	1334	0.966	0.91	16597	0.983
KCTD2	-4.85	8	-1.34	0.0897	1335	0.966	0.91	16596	0.983
MLF2	-4.85	8	-1.34	0.0897	1336	0.966	0.91	16595	0.983
VILL	-4.85	8	-1.34	0.0898	1337	0.966	0.91	16594	0.983
MSS51	-4.84	8	-1.34	0.09	1338	0.966	0.91	16593	0.983
IZUMO4	-4.84	8	-1.34	0.09	1339	0.966	0.91	16592	0.983
HOXC4	-4.84	8	-1.34	0.0901	1340	0.966	0.91	16591	0.983
PPP2R5A	-4.84	8	-1.34	0.0901	1341	0.966	0.91	16590	0.983
CASP14	-4.84	8	-1.34	0.0902	1342	0.966	0.91	16589	0.983
APBA3	-4.84	8	-1.34	0.0902	1343	0.966	0.91	16588	0.983
MYL6	-4.84	8	-1.34	0.0903	1344	0.966	0.91	16587	0.983
PPP2R5D	-4.84	8	-1.34	0.0903	1345	0.966	0.91	16586	0.983
MAPKAPK3	-4.84	8	-1.34	0.0904	1346	0.966	0.91	16585	0.983
A4GNT	-4.83	8	-1.34	0.0906	1347	0.966	0.909	16584	0.983
FAM19A5	-4.83	8	-1.34	0.0906	1348	0.966	0.909	16583	0.983
SPERT	-4.83	8	-1.34	0.0908	1349	0.966	0.909	16582	0.983
DSTYK	-4.82	8	-1.33	0.0911	1350	0.966	0.909	16581	0.983
POPDC2	-4.82	8	-1.33	0.0911	1351	0.966	0.909	16580	0.983
OBSCN	-4.82	8	-1.33	0.0911	1352	0.966	0.909	16579	0.983
ALKBH4	-4.82	8	-1.33	0.0912	1353	0.966	0.909	16578	0.983
KANK4	-4.82	8	-1.33	0.0913	1354	0.966	0.909	16577	0.983
C18orf21	-4.82	8	-1.33	0.0913	1355	0.966	0.909	16576	0.983
HS6ST2	-4.81	8	-1.33	0.0915	1356	0.966	0.909	16575	0.983
CDC123	-4.81	8	-1.33	0.0917	1357	0.966	0.908	16574	0.983
ASNA1	-4.81	8	-1.33	0.0917	1358	0.966	0.908	16573	0.983
CBS	-4.81	8	-1.33	0.0917	1359	0.966	0.908	16572	0.983
EML1	-4.81	8	-1.33	0.0918	1360	0.966	0.908	16571	0.983
WDR90	-4.8	8	-1.33	0.092	1361	0.966	0.908	16570	0.983
BTLA	-4.8	8	-1.33	0.0921	1362	0.966	0.908	16569	0.983
HMG20B	-4.8	8	-1.33	0.0921	1363	0.966	0.908	16568	0.983
TBC1D25	-4.8	8	-1.33	0.0921	1364	0.966	0.908	16567	0.983
BRPF1	-4.8	8	-1.33	0.0922	1365	0.966	0.908	16566	0.983
KLHDC8A	-4.8	8	-1.33	0.0922	1366	0.966	0.908	16565	0.983
B3GNT5	-4.8	8	-1.33	0.0922	1367	0.966	0.908	16564	0.983
NTN4	-4.8	8	-1.33	0.0923	1368	0.966	0.908	16563	0.983
ZRANB1	-4.79	8	-1.33	0.0923	1369	0.966	0.908	16562	0.983
PMF1	-4.79	8	-1.33	0.0924	1370	0.966	0.908	16561	0.983
OSTC	-4.79	8	-1.33	0.0924	1371	0.966	0.908	16560	0.983
TRA2B	-4.79	8	-1.33	0.0924	1372	0.966	0.908	16559	0.983
SP7	-4.79	8	-1.33	0.0926	1373	0.966	0.907	16558	0.983
TNFRSF12A	-4.78	8	-1.32	0.0929	1374	0.966	0.907	16557	0.982
KCNK5	-4.78	8	-1.32	0.093	1375	0.966	0.907	16556	0.982
OR51S1	-4.78	8	-1.32	0.093	1376	0.966	0.907	16555	0.982
KCNG2	-4.78	8	-1.32	0.0931	1377	0.966	0.907	16554	0.982
ZNF689	-4.78	8	-1.32	0.0932	1378	0.966	0.907	16553	0.982
UCMA	-4.78	8	-1.32	0.0932	1379	0.966	0.907	16552	0.982
TAS1R3	-4.77	8	-1.32	0.0933	1380	0.966	0.907	16551	0.982
ATP5B	-4.77	8	-1.32	0.0933	1381	0.966	0.907	16550	0.982
KDM4B	-4.77	8	-1.32	0.0935	1382	0.966	0.907	16549	0.982
PWP2	-4.77	8	-1.32	0.0936	1383	0.966	0.906	16548	0.982
USP51	-4.76	8	-1.32	0.0938	1384	0.966	0.906	16547	0.982
FURIN	-4.76	8	-1.32	0.094	1385	0.966	0.906	16546	0.982
BFAR	-4.76	8	-1.32	0.094	1386	0.966	0.906	16545	0.982
BMP7	-4.76	8	-1.32	0.0941	1387	0.966	0.906	16544	0.982
KIAA0087	-4.75	8	-1.32	0.0942	1388	0.966	0.906	16543	0.982
NAB2	-4.75	8	-1.31	0.0943	1389	0.966	0.906	16542	0.982
METTL10	-4.75	8	-1.31	0.0943	1390	0.966	0.906	16541	0.982
PSMA7	-4.44	7	-1.31	0.0944	1391	0.966	0.906	16540	0.982
ODF3B	-4.75	8	-1.31	0.0947	1392	0.966	0.905	16539	0.981
CEBPZ	-4.75	8	-1.31	0.0947	1393	0.966	0.905	16538	0.981
MRPL13	-4.74	8	-1.31	0.0947	1394	0.966	0.905	16537	0.981
EIF2S2	-3.35	4	-1.31	0.0948	1395	0.966	0.905	16536	0.981
OVGP1	-4.74	8	-1.31	0.0948	1396	0.966	0.905	16535	0.981
BST2	-4.74	8	-1.31	0.0948	1397	0.966	0.905	16534	0.981
RPA2	-4.74	8	-1.31	0.0948	1398	0.966	0.905	16533	0.981
ZMYND10	-4.74	8	-1.31	0.095	1399	0.966	0.905	16532	0.981
TRIM27	-4.74	8	-1.31	0.095	1400	0.966	0.905	16531	0.981
SLC35A2	-4.74	8	-1.31	0.0951	1401	0.966	0.905	16530	0.981
ATP6V1C2	-4.73	8	-1.31	0.0953	1402	0.966	0.905	16529	0.981
GTF2E2	-4.73	8	-1.31	0.0954	1403	0.966	0.905	16528	0.981
NAT8L	-2.37	2	-1.31	0.0954	1404	0.966	0.905	16527	0.981
COLQ	-4.73	8	-1.31	0.0954	1405	0.966	0.905	16526	0.981
FCF1	-3.34	4	-1.31	0.0955	1406	0.966	0.905	16525	0.981
TACC3	-4.73	8	-1.31	0.0955	1407	0.966	0.905	16524	0.981
TARBP2	-4.73	8	-1.31	0.0955	1408	0.966	0.904	16523	0.981
CHRM3	-4.73	8	-1.31	0.0956	1409	0.966	0.904	16522	0.981
LIN28A	-4.73	8	-1.31	0.0956	1410	0.966	0.904	16521	0.981
GPC6	-4.72	8	-1.31	0.0957	1411	0.966	0.904	16520	0.981
SYP	-4.72	8	-1.31	0.0958	1412	0.966	0.904	16519	0.981
MAPKAPK2	-4.72	8	-1.31	0.0959	1413	0.966	0.904	16518	0.981
POLR1A	-4.72	8	-1.3	0.0961	1414	0.966	0.904	16517	0.981
PARD6A	-4.71	8	-1.3	0.0962	1415	0.966	0.904	16516	0.981
NOC3L	-4.71	8	-1.3	0.0962	1416	0.966	0.904	16515	0.981
PID1	-4.71	8	-1.3	0.0963	1417	0.966	0.904	16514	0.981
GEMIN4	-4.71	8	-1.3	0.0963	1418	0.966	0.904	16513	0.981
RABL6	-4.71	8	-1.3	0.0963	1419	0.966	0.904	16512	0.981
FMO3	-4.71	8	-1.3	0.0965	1420	0.966	0.903	16511	0.981
PHLDA3	-4.71	8	-1.3	0.0965	1421	0.966	0.903	16510	0.981
AGPAT2	-4.71	8	-1.3	0.0966	1422	0.966	0.903	16509	0.981
SFTPD	-4.71	8	-1.3	0.0966	1423	0.966	0.903	16508	0.981
C1orf106	-4.7	8	-1.3	0.0967	1424	0.966	0.903	16507	0.981
PPAPDC3	-4.7	8	-1.3	0.0968	1425	0.966	0.903	16506	0.981
RANBP6	-4.7	8	-1.3	0.0969	1426	0.966	0.903	16505	0.981
IGDCC3	-4.7	8	-1.3	0.097	1427	0.966	0.903	16504	0.981
ANKRD34A	-4.7	8	-1.3	0.097	1428	0.966	0.903	16503	0.981
C3	-4.69	8	-1.3	0.0972	1429	0.966	0.903	16502	0.981
CSNK1G2	-4.69	8	-1.3	0.0972	1430	0.966	0.903	16501	0.981
TBL2	-4.69	8	-1.3	0.0973	1431	0.966	0.903	16500	0.981
PEAR1	-4.69	8	-1.3	0.0973	1432	0.966	0.903	16499	0.981
CD97	-4.69	8	-1.3	0.0974	1433	0.966	0.903	16498	0.981
MOB2	-4.69	8	-1.3	0.0975	1434	0.966	0.903	16497	0.981
TUBB3	-4.69	8	-1.3	0.0975	1435	0.966	0.902	16496	0.981
FCGR2A	-4.69	8	-1.3	0.0975	1436	0.966	0.902	16495	0.981
RPUSD3	-4.69	8	-1.3	0.0975	1437	0.966	0.902	16494	0.981
PDE6C	-4.69	8	-1.3	0.0975	1438	0.966	0.902	16493	0.981
MICU1	-4.68	8	-1.3	0.0977	1439	0.966	0.902	16492	0.981
ODF4	-4.68	8	-1.29	0.0977	1440	0.966	0.902	16491	0.981
EARS2	-4.68	8	-1.29	0.0978	1441	0.966	0.902	16490	0.981
RGS6	-4.68	8	-1.29	0.0979	1442	0.966	0.902	16489	0.981
OXSR1	-4.68	8	-1.29	0.0981	1443	0.966	0.902	16488	0.981
TBC1D23	-4.68	8	-1.29	0.0981	1444	0.966	0.902	16487	0.981
ANAPC13	-4.67	8	-1.29	0.0983	1445	0.966	0.902	16486	0.981
ZNF444	-4.67	8	-1.29	0.0984	1446	0.966	0.902	16485	0.981
BCL2L11	-4.67	8	-1.29	0.0985	1447	0.966	0.901	16484	0.981
STAG3	-4.66	8	-1.29	0.0987	1448	0.966	0.901	16483	0.98
CLK3	-4.66	8	-1.29	0.0987	1449	0.966	0.901	16482	0.98
PEAK1	-4.66	8	-1.29	0.0987	1450	0.966	0.901	16481	0.98
RUFY4	-4.66	8	-1.29	0.0988	1451	0.966	0.901	16480	0.98
TMEM240	-4.04	6	-1.29	0.0989	1452	0.966	0.901	16479	0.98
RPS27A	-2.33	2	-1.29	0.0989	1453	0.966	0.901	16478	0.98
SUGP2	-4.66	8	-1.29	0.099	1454	0.966	0.901	16477	0.98
NR2F6	-4.03	6	-1.29	0.0992	1455	0.966	0.901	16476	0.98
SYNGR2	-4.65	8	-1.29	0.0992	1456	0.966	0.901	16475	0.98
STX7	-4.65	8	-1.29	0.0993	1457	0.966	0.901	16474	0.98
ACTL7A	-4.65	8	-1.29	0.0993	1458	0.966	0.901	16473	0.98
TRIM31	-4.65	8	-1.29	0.0994	1459	0.966	0.901	16472	0.98
LIN37	-4.65	8	-1.28	0.0996	1460	0.966	0.9	16471	0.98
IRF2BP2	-4.65	8	-1.28	0.0996	1461	0.966	0.9	16470	0.98
PGBD5	-4.64	8	-1.28	0.0996	1462	0.966	0.9	16469	0.98
NUP155	-4.64	8	-1.28	0.0996	1463	0.966	0.9	16468	0.98
USP26	-4.64	8	-1.28	0.0997	1464	0.966	0.9	16467	0.98
CXorf22	-4.64	8	-1.28	0.0998	1465	0.966	0.9	16466	0.98
BATF3	-4.64	8	-1.28	0.0999	1466	0.966	0.9	16465	0.98
IGFBP6	-4.64	8	-1.28	0.0999	1467	0.966	0.9	16464	0.98
MEGF6	-4.64	8	-1.28	0.1	1468	0.966	0.9	16463	0.98
NUP205	-4.64	8	-1.28	0.1	1469	0.966	0.9	16462	0.98
ASB11	-4.64	8	-1.28	0.1	1470	0.966	0.9	16461	0.98
SAMD7	-4.64	8	-1.28	0.1	1471	0.966	0.9	16460	0.98
ARID1A	-4.64	8	-1.28	0.1	1472	0.966	0.9	16459	0.98
KRT38	-4.64	8	-1.28	0.1	1473	0.966	0.9	16458	0.98
RAD52	-4.64	8	-1.28	0.1	1474	0.966	0.9	16457	0.98
PSORS1C2	-4.63	8	-1.28	0.1	1475	0.966	0.9	16456	0.98
GFER	-4.63	8	-1.28	0.1	1476	0.966	0.9	16455	0.98
NRAP	-4.63	8	-1.28	0.101	1477	0.966	0.899	16454	0.98
MRAS	-4.62	8	-1.28	0.101	1478	0.966	0.899	16453	0.98
KPNA6	-4.62	8	-1.28	0.101	1479	0.966	0.899	16452	0.98
RPRML	-4.62	8	-1.28	0.101	1480	0.966	0.899	16451	0.98
HES3	-4.62	8	-1.28	0.101	1481	0.966	0.899	16450	0.98
NR1I3	-4.62	8	-1.28	0.101	1482	0.966	0.899	16449	0.98
SAMD8	-4.62	8	-1.28	0.101	1483	0.966	0.899	16448	0.98
NUP210L	-4.62	8	-1.28	0.101	1484	0.966	0.899	16447	0.98
CTU1	-4.62	8	-1.28	0.101	1485	0.966	0.899	16446	0.98
STAB1	-4.62	8	-1.28	0.101	1486	0.966	0.899	16445	0.98
SIGLEC5	-4.62	8	-1.28	0.101	1487	0.966	0.899	16444	0.98
MRPS24	-4.61	8	-1.27	0.101	1488	0.966	0.899	16443	0.98
TNFRSF14	-4.61	8	-1.27	0.101	1489	0.966	0.899	16442	0.98
RXRB	-4.61	8	-1.27	0.101	1490	0.966	0.899	16441	0.98
RASL11B	-4.61	8	-1.27	0.101	1491	0.966	0.899	16440	0.98
ASAH2	-4.61	8	-1.27	0.101	1492	0.966	0.899	16439	0.98
POLR2C	-4.61	8	-1.27	0.101	1493	0.966	0.899	16438	0.98
C4orf32	-4.61	8	-1.27	0.101	1494	0.966	0.899	16437	0.98
IPMK	-4.61	8	-1.27	0.102	1495	0.966	0.898	16436	0.98
OPN3	-4.6	8	-1.27	0.102	1496	0.966	0.898	16435	0.98
CD22	-4.6	8	-1.27	0.102	1497	0.966	0.898	16434	0.98
CFP	-4.6	8	-1.27	0.102	1498	0.966	0.898	16433	0.98
IDH3G	-4.6	8	-1.27	0.102	1499	0.966	0.898	16432	0.98
PDE3A	-4.6	8	-1.27	0.102	1500	0.966	0.898	16431	0.98
ZNF696	-4.6	8	-1.27	0.102	1501	0.966	0.898	16430	0.98
AWAT2	-4.6	8	-1.27	0.102	1502	0.966	0.898	16429	0.98
PCSK4	-3.98	6	-1.27	0.102	1503	0.966	0.898	16428	0.98
KIAA0247	-4.6	8	-1.27	0.102	1504	0.966	0.898	16427	0.98
FAM180B	-4.6	8	-1.27	0.102	1505	0.966	0.898	16426	0.98
COX5B	-4.6	8	-1.27	0.102	1506	0.966	0.898	16425	0.98
EXOSC3	-4.59	8	-1.27	0.102	1507	0.966	0.898	16424	0.98
GNA11	-4.59	8	-1.27	0.102	1508	0.966	0.898	16423	0.98
VAMP1	-4.59	8	-1.27	0.102	1509	0.966	0.898	16422	0.98
IKBKE	-4.59	8	-1.27	0.102	1510	0.966	0.898	16421	0.98
EFTUD1	-4.59	8	-1.27	0.102	1511	0.966	0.898	16420	0.98
YES1	-4.59	8	-1.27	0.103	1512	0.966	0.897	16419	0.98
P4HB	-4.58	8	-1.27	0.103	1513	0.966	0.897	16418	0.98
RGS16	-4.58	8	-1.26	0.103	1514	0.966	0.897	16417	0.98
CENPW	-4.58	8	-1.26	0.103	1515	0.966	0.897	16416	0.98
OSBPL11	-4.58	8	-1.26	0.103	1516	0.966	0.897	16415	0.98
RASGRF1	-4.58	8	-1.26	0.103	1517	0.966	0.897	16414	0.98
PCDH15	-4.57	8	-1.26	0.103	1518	0.966	0.897	16413	0.98
KHDRBS1	-4.57	8	-1.26	0.103	1519	0.966	0.897	16412	0.98
NGB	-4.57	8	-1.26	0.103	1520	0.966	0.897	16411	0.98
MGRN1	-4.57	8	-1.26	0.103	1521	0.966	0.897	16410	0.98
FAM207A	-4.57	8	-1.26	0.103	1522	0.966	0.897	16409	0.98
PPTC7	-4.57	8	-1.26	0.104	1523	0.966	0.896	16408	0.98
TTC7B	-4.57	8	-1.26	0.104	1524	0.966	0.896	16407	0.98
SPTB	-4.56	8	-1.26	0.104	1525	0.966	0.896	16406	0.98
POLR2H	-4.56	8	-1.26	0.104	1526	0.966	0.896	16405	0.98
RPN1	-4.56	8	-1.26	0.104	1527	0.966	0.896	16404	0.98
ERP29	-4.56	8	-1.26	0.104	1528	0.966	0.896	16403	0.98
TEX29	-4.56	8	-1.26	0.104	1529	0.966	0.896	16402	0.98
MXRA8	-4.56	8	-1.26	0.104	1530	0.966	0.896	16401	0.98
CCL17	-3.95	6	-1.26	0.104	1531	0.966	0.896	16400	0.98
ZCCHC17	-4.56	8	-1.26	0.104	1532	0.966	0.896	16399	0.98
TMEM203	-4.55	8	-1.26	0.104	1533	0.966	0.896	16398	0.979
B4GALNT1	-4.55	8	-1.26	0.105	1534	0.966	0.895	16397	0.979
PDIA6	-4.55	8	-1.25	0.105	1535	0.966	0.895	16396	0.979
EIF4G3	-4.55	8	-1.25	0.105	1536	0.966	0.895	16395	0.979
MTFR2	-4.54	8	-1.25	0.105	1537	0.966	0.895	16394	0.979
UBL7	-4.54	8	-1.25	0.105	1538	0.966	0.895	16393	0.979
GTF2I	-4.54	8	-1.25	0.105	1539	0.966	0.895	16392	0.979
BRINP2	-4.54	8	-1.25	0.105	1540	0.966	0.895	16391	0.979
PDE10A	-4.54	8	-1.25	0.105	1541	0.966	0.895	16390	0.979
TECPR2	-4.54	8	-1.25	0.105	1542	0.966	0.895	16389	0.979
MVK	-4.54	8	-1.25	0.105	1543	0.966	0.895	16388	0.979
YY1	-4.54	8	-1.25	0.105	1544	0.966	0.895	16387	0.979
MYBL2	-4.54	8	-1.25	0.105	1545	0.966	0.895	16386	0.979
KLF16	-4.54	8	-1.25	0.105	1546	0.966	0.895	16385	0.979
IGSF3	-4.54	8	-1.25	0.105	1547	0.966	0.895	16384	0.979
WDR66	-4.54	8	-1.25	0.105	1548	0.966	0.895	16383	0.979
GRIK2	-4.53	8	-1.25	0.105	1549	0.966	0.895	16382	0.979
DMTN	-4.53	8	-1.25	0.105	1550	0.966	0.895	16381	0.979
CLEC1A	-4.53	8	-1.25	0.106	1551	0.966	0.894	16380	0.979
CCDC101	-4.53	8	-1.25	0.106	1552	0.966	0.894	16379	0.979
AZI1	-4.53	8	-1.25	0.106	1553	0.966	0.894	16378	0.979
PAH	-4.52	8	-1.25	0.106	1554	0.966	0.894	16377	0.979
CD58	-4.52	8	-1.25	0.106	1555	0.966	0.894	16376	0.979
DUSP21	-4.52	8	-1.25	0.106	1556	0.966	0.894	16375	0.979
C9orf141	-4.52	8	-1.25	0.106	1557	0.966	0.894	16374	0.979
TOMM22	-4.52	8	-1.25	0.106	1558	0.966	0.894	16373	0.979
C2orf69	-4.52	8	-1.25	0.106	1559	0.966	0.894	16372	0.979
MTA1	-4.51	8	-1.25	0.106	1560	0.966	0.894	16371	0.979
ANGPTL3	-4.51	8	-1.25	0.106	1561	0.966	0.894	16370	0.979
ZNF678	-3.19	4	-1.25	0.106	1562	0.966	0.894	16369	0.979
CREG1	-4.51	8	-1.25	0.106	1563	0.966	0.894	16368	0.979
TGFBR3L	-4.51	8	-1.24	0.107	1564	0.966	0.893	16367	0.979
BTBD10	-4.51	8	-1.24	0.107	1565	0.966	0.893	16366	0.979
RGS14	-4.51	8	-1.24	0.107	1566	0.966	0.893	16365	0.979
ZNF8	-4.51	8	-1.24	0.107	1567	0.966	0.893	16364	0.979
GBE1	-4.51	8	-1.24	0.107	1568	0.966	0.893	16363	0.979
SEH1L	-4.5	8	-1.24	0.107	1569	0.966	0.893	16362	0.979
FRAT1	-4.5	8	-1.24	0.107	1570	0.966	0.893	16361	0.978
GEMIN8	-4.5	8	-1.24	0.107	1571	0.966	0.893	16360	0.978
TYSND1	-4.5	8	-1.24	0.107	1572	0.966	0.893	16359	0.978
SOAT1	-4.5	8	-1.24	0.107	1573	0.966	0.893	16358	0.978
NFYC	-4.49	8	-1.24	0.107	1574	0.966	0.893	16357	0.978
MIB2	-4.49	8	-1.24	0.107	1575	0.966	0.893	16356	0.978
USP49	-4.49	8	-1.24	0.108	1576	0.966	0.892	16355	0.978
NUDT1	-4.49	8	-1.24	0.108	1577	0.966	0.892	16354	0.978
INO80C	-4.49	8	-1.24	0.108	1578	0.966	0.892	16353	0.978
DUSP26	-4.49	8	-1.24	0.108	1579	0.966	0.892	16352	0.978
TRAF7	-4.49	8	-1.24	0.108	1580	0.966	0.892	16351	0.978
PI16	-4.49	8	-1.24	0.108	1581	0.966	0.892	16350	0.978
PSMD3	-4.48	8	-1.24	0.108	1582	0.966	0.892	16349	0.978
SERINC2	-4.48	8	-1.24	0.108	1583	0.966	0.892	16348	0.978
CDKN1C	-4.48	8	-1.24	0.108	1584	0.966	0.892	16347	0.978
SLC5A1	-4.48	8	-1.24	0.108	1585	0.966	0.892	16346	0.978
FAM124B	-4.48	8	-1.24	0.108	1586	0.966	0.892	16345	0.978
FAM163A	-4.48	8	-1.24	0.108	1587	0.966	0.892	16344	0.978
STS	-4.48	8	-1.24	0.108	1588	0.966	0.892	16343	0.978
MBTD1	-4.47	8	-1.23	0.108	1589	0.966	0.892	16342	0.978
AGPAT5	-4.47	8	-1.23	0.109	1590	0.966	0.891	16341	0.978
SERTM1	-4.46	8	-1.23	0.109	1591	0.966	0.891	16340	0.978
CSF1	-4.46	8	-1.23	0.109	1592	0.966	0.891	16339	0.978
NDUFS1	-4.46	8	-1.23	0.109	1593	0.966	0.891	16338	0.978
WDHD1	-4.46	8	-1.23	0.109	1594	0.966	0.891	16337	0.977
BCAS3	-3.86	6	-1.23	0.109	1595	0.966	0.891	16336	0.977
MAGEB5	-4.46	8	-1.23	0.11	1596	0.966	0.89	16335	0.977
METTL13	-4.45	8	-1.23	0.11	1597	0.966	0.89	16334	0.977
DDX50	-4.45	8	-1.23	0.11	1598	0.966	0.89	16333	0.977
GPR113	-4.45	8	-1.23	0.11	1599	0.966	0.89	16332	0.977
E2F1	-4.45	8	-1.23	0.11	1600	0.966	0.89	16331	0.977
RFTN2	-4.45	8	-1.23	0.11	1601	0.966	0.89	16330	0.977
COX8C	-4.44	8	-1.23	0.11	1602	0.966	0.89	16329	0.977
PSMB4	-4.44	8	-1.23	0.11	1603	0.966	0.89	16328	0.977
VSIG1	-4.44	8	-1.23	0.11	1604	0.966	0.89	16327	0.977
NPY4R	-4.44	8	-1.23	0.11	1605	0.966	0.89	16326	0.977
BANF2	-4.44	8	-1.23	0.11	1606	0.966	0.89	16325	0.977
GRSF1	-4.15	7	-1.22	0.11	1607	0.966	0.89	16324	0.977
SNX21	-4.44	8	-1.22	0.11	1608	0.966	0.89	16323	0.977
FAM154A	-4.44	8	-1.22	0.111	1609	0.966	0.889	16322	0.977
TMEM79	-4.44	8	-1.22	0.111	1610	0.966	0.889	16321	0.977
DHTKD1	-4.44	8	-1.22	0.111	1611	0.966	0.889	16320	0.977
C1orf53	-4.43	8	-1.22	0.111	1612	0.966	0.889	16319	0.977
PIK3AP1	-4.43	8	-1.22	0.111	1613	0.966	0.889	16318	0.977
FAM20B	-4.43	8	-1.22	0.111	1614	0.966	0.889	16317	0.977
AAED1	-4.43	8	-1.22	0.111	1615	0.966	0.889	16316	0.977
CPT2	-4.43	8	-1.22	0.111	1616	0.966	0.889	16315	0.977
TMEM57	-4.43	8	-1.22	0.111	1617	0.966	0.889	16314	0.977
ABHD8	-4.43	8	-1.22	0.111	1618	0.966	0.889	16313	0.977
KIAA1644	-4.43	8	-1.22	0.111	1619	0.966	0.889	16312	0.977
ASS1	-4.43	8	-1.22	0.111	1620	0.966	0.889	16311	0.977
NUDT3	-4.42	8	-1.22	0.111	1621	0.966	0.889	16310	0.977
LARS2	-4.42	8	-1.22	0.111	1622	0.966	0.889	16309	0.977
DUSP16	-4.42	8	-1.22	0.111	1623	0.966	0.889	16308	0.977
HORMAD1	-4.42	8	-1.22	0.111	1624	0.966	0.889	16307	0.977
C17orf62	-4.42	8	-1.22	0.111	1625	0.966	0.889	16306	0.977
C6orf120	-4.42	8	-1.22	0.111	1626	0.966	0.889	16305	0.977
SLC2A9	-4.42	8	-1.22	0.111	1627	0.966	0.889	16304	0.977
OSTF1	-4.42	8	-1.22	0.112	1628	0.966	0.888	16303	0.977
TALDO1	-4.42	8	-1.22	0.112	1629	0.966	0.888	16302	0.977
HRASLS2	-4.42	8	-1.22	0.112	1630	0.966	0.888	16301	0.977
LRMP	-4.13	7	-1.22	0.112	1631	0.966	0.888	16300	0.977
MED11	-4.41	8	-1.22	0.112	1632	0.966	0.888	16299	0.977
MRGPRX1	-3.81	6	-1.21	0.112	1633	0.966	0.888	16298	0.977
KIAA2018	-4.4	8	-1.21	0.112	1634	0.966	0.888	16297	0.977
ARF4	-4.4	8	-1.21	0.112	1635	0.966	0.888	16296	0.977
MPV17	-4.4	8	-1.21	0.112	1636	0.966	0.888	16295	0.977
PBX4	-4.4	8	-1.21	0.112	1637	0.966	0.888	16294	0.977
POU6F1	-4.4	8	-1.21	0.112	1638	0.966	0.888	16293	0.977
TNFSF13B	-4.4	8	-1.21	0.112	1639	0.966	0.888	16292	0.977
DRAM1	-4.4	8	-1.21	0.113	1640	0.966	0.887	16291	0.977
NCR2	-4.4	8	-1.21	0.113	1641	0.966	0.887	16290	0.977
OPRD1	-4.39	8	-1.21	0.113	1642	0.966	0.887	16289	0.976
RASGRP1	-4.39	8	-1.21	0.113	1643	0.966	0.887	16288	0.976
CRISP3	-4.39	8	-1.21	0.113	1644	0.966	0.887	16287	0.976
CCDC157	-4.39	8	-1.21	0.113	1645	0.966	0.887	16286	0.976
ATP2C1	-4.39	8	-1.21	0.113	1646	0.966	0.887	16285	0.976
ST7	-4.39	8	-1.21	0.113	1647	0.966	0.887	16284	0.976
CCNA1	-4.39	8	-1.21	0.113	1648	0.966	0.887	16283	0.976
BRI3	-4.39	8	-1.21	0.113	1649	0.966	0.887	16282	0.976
TRPC3	-4.39	8	-1.21	0.113	1650	0.966	0.887	16281	0.976
METTL7B	-4.38	8	-1.21	0.113	1651	0.966	0.887	16280	0.976
PIP4K2C	-4.38	8	-1.21	0.114	1652	0.966	0.886	16279	0.976
PLEKHD1	-4.38	8	-1.21	0.114	1653	0.966	0.886	16278	0.976
ENOX2	-4.37	8	-1.21	0.114	1654	0.966	0.886	16277	0.976
CAP2	-4.37	8	-1.21	0.114	1655	0.966	0.886	16276	0.976
VCP	-4.37	8	-1.21	0.114	1656	0.966	0.886	16275	0.976
NHP2	-4.37	8	-1.21	0.114	1657	0.966	0.886	16274	0.976
TRIM10	-4.37	8	-1.2	0.114	1658	0.966	0.886	16273	0.976
TCEAL8	-4.37	8	-1.2	0.114	1659	0.966	0.886	16272	0.976
SLC19A2	-4.37	8	-1.2	0.114	1660	0.966	0.886	16271	0.976
COX6B2	-4.37	8	-1.2	0.114	1661	0.966	0.886	16270	0.976
PARP2	-4.37	8	-1.2	0.114	1662	0.966	0.886	16269	0.976
IRF4	-4.37	8	-1.2	0.114	1663	0.966	0.886	16268	0.976
GRID1	-4.37	8	-1.2	0.114	1664	0.966	0.886	16267	0.976
MAGEB3	-4.37	8	-1.2	0.114	1665	0.966	0.886	16266	0.976
C6orf1	-4.36	8	-1.2	0.114	1666	0.966	0.886	16265	0.976
TBX22	-4.36	8	-1.2	0.115	1667	0.966	0.885	16264	0.976
TCAIM	-4.36	8	-1.2	0.115	1668	0.966	0.885	16263	0.976
OVCH1	-4.36	8	-1.2	0.115	1669	0.966	0.885	16262	0.976
OSBPL9	-4.36	8	-1.2	0.115	1670	0.966	0.885	16261	0.976
TP53INP1	-4.36	8	-1.2	0.115	1671	0.966	0.885	16260	0.976
HTRA4	-4.36	8	-1.2	0.115	1672	0.966	0.885	16259	0.976
OR2K2	-4.36	8	-1.2	0.115	1673	0.966	0.885	16258	0.976
KIAA1522	-4.36	8	-1.2	0.115	1674	0.966	0.885	16257	0.976
FAM175A	-4.35	8	-1.2	0.115	1675	0.966	0.885	16256	0.976
RBM20	-4.35	8	-1.2	0.115	1676	0.966	0.885	16255	0.976
ANO2	-4.35	8	-1.2	0.115	1677	0.966	0.885	16254	0.976
RASSF3	-4.35	8	-1.2	0.115	1678	0.966	0.885	16253	0.976
GP9	-4.35	8	-1.2	0.115	1679	0.966	0.885	16252	0.976
PNMA1	-4.35	8	-1.2	0.115	1680	0.966	0.885	16251	0.976
CCDC34	-4.35	8	-1.2	0.115	1681	0.966	0.885	16250	0.976
KIF19	-4.34	8	-1.2	0.116	1682	0.966	0.884	16249	0.976
ZSCAN10	-4.34	8	-1.2	0.116	1683	0.966	0.884	16248	0.976
FAIM3	-4.34	8	-1.2	0.116	1684	0.966	0.884	16247	0.976
PTGDR2	-4.34	8	-1.2	0.116	1685	0.966	0.884	16246	0.976
NWD1	-4.34	8	-1.2	0.116	1686	0.966	0.884	16245	0.976
ZNF560	-4.34	8	-1.2	0.116	1687	0.966	0.884	16244	0.976
TMEM244	-4.34	8	-1.2	0.116	1688	0.966	0.884	16243	0.976
EPB41L1	-4.34	8	-1.2	0.116	1689	0.966	0.884	16242	0.976
NAT16	-4.34	8	-1.2	0.116	1690	0.966	0.884	16241	0.976
CERS2	-4.34	8	-1.2	0.116	1691	0.966	0.884	16240	0.976
ATRN	-4.34	8	-1.2	0.116	1692	0.966	0.884	16239	0.976
CUX2	-4.34	8	-1.19	0.116	1693	0.966	0.884	16238	0.976
AQR	-4.34	8	-1.19	0.116	1694	0.966	0.884	16237	0.976
SSR1	-4.33	8	-1.19	0.116	1695	0.966	0.884	16236	0.976
MRPL38	-3.75	6	-1.19	0.116	1696	0.966	0.884	16235	0.976
FZD8	-4.33	8	-1.19	0.116	1697	0.966	0.884	16234	0.976
GUK1	-4.33	8	-1.19	0.116	1698	0.966	0.884	16233	0.976
COX20	-2.17	2	-1.19	0.116	1699	0.966	0.884	16232	0.976
PSMB5	-4.33	8	-1.19	0.116	1700	0.966	0.884	16231	0.976
C12orf71	-4.33	8	-1.19	0.116	1701	0.966	0.884	16230	0.976
ZNF793	-4.33	8	-1.19	0.116	1702	0.966	0.884	16229	0.976
ZBTB17	-4.33	8	-1.19	0.116	1703	0.966	0.884	16228	0.976
POP7	-4.33	8	-1.19	0.117	1704	0.966	0.883	16227	0.976
TEAD1	-4.32	8	-1.19	0.117	1705	0.966	0.883	16226	0.976
DEGS1	-4.32	8	-1.19	0.117	1706	0.966	0.883	16225	0.976
SCGN	-4.32	8	-1.19	0.117	1707	0.966	0.883	16224	0.976
EIF3H	-4.32	8	-1.19	0.117	1708	0.966	0.883	16223	0.976
ITGB5	-4.32	8	-1.19	0.117	1709	0.966	0.883	16222	0.976
RAB4A	-4.32	8	-1.19	0.117	1710	0.966	0.883	16221	0.976
MUT	-4.32	8	-1.19	0.117	1711	0.966	0.883	16220	0.976
MTSS1L	-4.31	8	-1.19	0.117	1712	0.966	0.883	16219	0.976
LPAR3	-4.31	8	-1.19	0.117	1713	0.966	0.883	16218	0.976
COX7C	-4.31	8	-1.19	0.118	1714	0.966	0.882	16217	0.976
MICAL1	-4.31	8	-1.19	0.118	1715	0.966	0.882	16216	0.976
ZC3H10	-4.31	8	-1.19	0.118	1716	0.966	0.882	16215	0.976
ISYNA1	-4.31	8	-1.19	0.118	1717	0.966	0.882	16214	0.976
COPB2	-4.31	8	-1.19	0.118	1718	0.966	0.882	16213	0.976
ASH2L	-4.3	8	-1.19	0.118	1719	0.966	0.882	16212	0.976
PPAPDC2	-4.3	8	-1.18	0.118	1720	0.966	0.882	16211	0.975
DRD5	-4.3	8	-1.18	0.118	1721	0.966	0.882	16210	0.975
FARSB	-4.3	8	-1.18	0.118	1722	0.966	0.882	16209	0.975
TNP1	-4.3	8	-1.18	0.118	1723	0.966	0.882	16208	0.975
REST	-4.3	8	-1.18	0.118	1724	0.966	0.882	16207	0.975
LCN6	-4.3	8	-1.18	0.118	1725	0.966	0.882	16206	0.975
MRPL27	-4.29	8	-1.18	0.118	1726	0.966	0.882	16205	0.975
FBXW12	-4.29	8	-1.18	0.119	1727	0.966	0.881	16204	0.975
PLS1	-4.29	8	-1.18	0.119	1728	0.966	0.881	16203	0.975
TRABD	-4.29	8	-1.18	0.119	1729	0.966	0.881	16202	0.975
RIMS1	-4.29	8	-1.18	0.119	1730	0.966	0.881	16201	0.975
ZFR	-4.28	8	-1.18	0.119	1731	0.966	0.881	16200	0.975
MAPK14	-4.28	8	-1.18	0.119	1732	0.966	0.881	16199	0.975
YWHAQ	-4.27	8	-1.18	0.12	1733	0.966	0.88	16198	0.975
TBC1D16	-4.27	8	-1.18	0.12	1734	0.966	0.88	16197	0.975
HDAC7	-4.27	8	-1.18	0.12	1735	0.966	0.88	16196	0.975
KLHDC7A	-4.27	8	-1.18	0.12	1736	0.966	0.88	16195	0.975
IFIT1	-4.27	8	-1.18	0.12	1737	0.966	0.88	16194	0.975
RPS6KA4	-4.27	8	-1.18	0.12	1738	0.966	0.88	16193	0.975
TRAPPC11	-4.27	8	-1.18	0.12	1739	0.966	0.88	16192	0.975
SUV39H1	-4.27	8	-1.18	0.12	1740	0.966	0.88	16191	0.975
IGFALS	-4.27	8	-1.18	0.12	1741	0.966	0.88	16190	0.975
ZNF772	-4.27	8	-1.18	0.12	1742	0.966	0.88	16189	0.975
MED18	-4.27	8	-1.17	0.12	1743	0.966	0.88	16188	0.975
ANKRD9	-4.27	8	-1.17	0.12	1744	0.966	0.88	16187	0.975
ARHGEF40	-4.26	8	-1.17	0.12	1745	0.966	0.88	16186	0.975
PARD6B	-4.26	8	-1.17	0.12	1746	0.966	0.88	16185	0.975
ETNK1	-4.26	8	-1.17	0.12	1747	0.966	0.88	16184	0.975
KLF6	-4.26	8	-1.17	0.12	1748	0.966	0.88	16183	0.975
B3GALNT2	-4.26	8	-1.17	0.12	1749	0.966	0.88	16182	0.975
DCTN2	-4.26	8	-1.17	0.12	1750	0.966	0.88	16181	0.975
MARCKSL1	-4.26	8	-1.17	0.12	1751	0.966	0.88	16180	0.975
PRPF3	-4.26	8	-1.17	0.12	1752	0.966	0.88	16179	0.975
PTGER2	-4.26	8	-1.17	0.121	1753	0.966	0.879	16178	0.975
PPP2R2C	-4.26	8	-1.17	0.121	1754	0.966	0.879	16177	0.975
SCXA	-4.26	8	-1.17	0.121	1755	0.966	0.879	16176	0.975
RPS6KA1	-4.25	8	-1.17	0.121	1756	0.966	0.879	16175	0.975
CNOT1	-4.25	8	-1.17	0.121	1757	0.966	0.879	16174	0.975
DPEP2	-4.25	8	-1.17	0.121	1758	0.966	0.879	16173	0.974
EDARADD	-4.25	8	-1.17	0.121	1759	0.966	0.879	16172	0.974
GET4	-4.25	8	-1.17	0.121	1760	0.966	0.879	16171	0.974
UCK2	-4.24	8	-1.17	0.121	1761	0.966	0.879	16170	0.974
FCRL5	-4.24	8	-1.17	0.121	1762	0.966	0.879	16169	0.974
MRPS7	-4.24	8	-1.17	0.121	1763	0.966	0.879	16168	0.974
C11orf53	-4.24	8	-1.17	0.122	1764	0.966	0.878	16167	0.974
RFT1	-4.23	8	-1.16	0.122	1765	0.966	0.878	16166	0.974
NEK9	-4.23	8	-1.16	0.122	1766	0.966	0.878	16165	0.974
ZNF600	-4.23	8	-1.16	0.122	1767	0.966	0.878	16164	0.974
ACOX2	-4.23	8	-1.16	0.122	1768	0.966	0.878	16163	0.974
EPRS	-4.23	8	-1.16	0.122	1769	0.966	0.878	16162	0.974
ERICH1	-4.22	8	-1.16	0.123	1770	0.966	0.877	16161	0.974
SOX2	-4.22	8	-1.16	0.123	1771	0.966	0.877	16160	0.974
METTL1	-4.22	8	-1.16	0.123	1772	0.966	0.877	16159	0.974
GTPBP10	-4.22	8	-1.16	0.123	1773	0.966	0.877	16158	0.974
ELP3	-4.22	8	-1.16	0.123	1774	0.966	0.877	16157	0.974
KTI12	-4.22	8	-1.16	0.123	1775	0.966	0.877	16156	0.974
SLC19A3	-4.22	8	-1.16	0.123	1776	0.966	0.877	16155	0.974
AEBP2	-4.22	8	-1.16	0.123	1777	0.966	0.877	16154	0.974
GPR62	-4.21	8	-1.16	0.123	1778	0.966	0.877	16153	0.973
RERGL	-4.21	8	-1.16	0.123	1779	0.966	0.877	16152	0.973
IL18BP	-4.21	8	-1.16	0.123	1780	0.966	0.877	16151	0.973
ANXA11	-4.21	8	-1.16	0.123	1781	0.966	0.877	16150	0.973
TRIM38	-4.2	8	-1.16	0.124	1782	0.966	0.876	16149	0.973
SPC25	-4.2	8	-1.16	0.124	1783	0.966	0.876	16148	0.973
DCAF8L1	-4.2	8	-1.16	0.124	1784	0.966	0.876	16147	0.973
NECAP1	-4.2	8	-1.16	0.124	1785	0.966	0.876	16146	0.973
ARFGEF1	-4.2	8	-1.16	0.124	1786	0.966	0.876	16145	0.973
EML6	-4.2	8	-1.16	0.124	1787	0.966	0.876	16144	0.973
YJEFN3	-4.2	8	-1.15	0.124	1788	0.966	0.876	16143	0.973
C12orf10	-4.2	8	-1.15	0.124	1789	0.966	0.876	16142	0.973
C16orf86	-4.2	8	-1.15	0.124	1790	0.966	0.876	16141	0.973
HSPA6	-4.2	8	-1.15	0.124	1791	0.966	0.876	16140	0.973
MCPH1	-4.19	8	-1.15	0.124	1792	0.966	0.876	16139	0.973
KLHL31	-4.19	8	-1.15	0.124	1793	0.966	0.876	16138	0.973
MAP3K4	-4.19	8	-1.15	0.124	1794	0.966	0.876	16137	0.973
CACNA1D	-4.19	8	-1.15	0.124	1795	0.966	0.876	16136	0.973
MAMDC4	-4.19	8	-1.15	0.124	1796	0.966	0.876	16135	0.973
STOML2	-4.19	8	-1.15	0.124	1797	0.966	0.876	16134	0.973
NCF2	-4.19	8	-1.15	0.125	1798	0.966	0.875	16133	0.973
PAQR4	-4.19	8	-1.15	0.125	1799	0.966	0.875	16132	0.973
C16orf11	-4.19	8	-1.15	0.125	1800	0.966	0.875	16131	0.973
SLC26A6	-4.19	8	-1.15	0.125	1801	0.966	0.875	16130	0.973
CAMKK2	-4.19	8	-1.15	0.125	1802	0.966	0.875	16129	0.973
TIMM13	-4.18	8	-1.15	0.125	1803	0.966	0.875	16128	0.973
CCR7	-4.18	8	-1.15	0.125	1804	0.966	0.875	16127	0.973
RUVBL2	-4.18	8	-1.15	0.125	1805	0.966	0.875	16126	0.973
HSPA12A	-4.18	8	-1.15	0.125	1806	0.966	0.875	16125	0.973
RGS22	-4.18	8	-1.15	0.125	1807	0.966	0.875	16124	0.973
TPI1	-4.18	8	-1.15	0.125	1808	0.966	0.875	16123	0.973
CCDC97	-4.18	8	-1.15	0.125	1809	0.966	0.875	16122	0.973
CABLES1	-4.18	8	-1.15	0.125	1810	0.966	0.875	16121	0.973
PAFAH1B1	-4.18	8	-1.15	0.125	1811	0.966	0.875	16120	0.973
KIAA1161	-4.18	8	-1.15	0.125	1812	0.966	0.875	16119	0.973
MYOM3	-4.18	8	-1.15	0.125	1813	0.966	0.875	16118	0.973
PTDSS2	-4.18	8	-1.15	0.125	1814	0.966	0.875	16117	0.973
LPGAT1	-4.18	8	-1.15	0.125	1815	0.966	0.875	16116	0.973
THAP2	-4.18	8	-1.15	0.125	1816	0.966	0.875	16115	0.973
KAT2A	-4.17	8	-1.15	0.125	1817	0.966	0.875	16114	0.973
SPATS2	-4.17	8	-1.15	0.125	1818	0.966	0.875	16113	0.973
YPEL1	-4.17	8	-1.15	0.125	1819	0.966	0.875	16112	0.973
SMC3	-4.17	8	-1.15	0.125	1820	0.966	0.875	16111	0.973
ZNF497	-4.17	8	-1.15	0.126	1821	0.966	0.874	16110	0.973
MAN2A2	-4.17	8	-1.15	0.126	1822	0.966	0.874	16109	0.973
FBXW4	-4.17	8	-1.15	0.126	1823	0.966	0.874	16108	0.973
EPHX4	-4.17	8	-1.15	0.126	1824	0.966	0.874	16107	0.973
MRGPRX4	-4.17	8	-1.15	0.126	1825	0.966	0.874	16106	0.973
TM4SF4	-4.17	8	-1.15	0.126	1826	0.966	0.874	16105	0.973
ATXN3	-4.17	8	-1.15	0.126	1827	0.966	0.874	16104	0.973
GNAT1	-4.16	8	-1.15	0.126	1828	0.966	0.874	16103	0.973
HSD11B1	-4.16	8	-1.15	0.126	1829	0.966	0.874	16102	0.973
GABRA2	-4.16	8	-1.15	0.126	1830	0.966	0.874	16101	0.973
LEAP2	-4.16	8	-1.15	0.126	1831	0.966	0.874	16100	0.973
TATDN3	-4.15	8	-1.14	0.127	1832	0.966	0.873	16099	0.973
MRPS16	-4.15	8	-1.14	0.127	1833	0.966	0.873	16098	0.973
ZNF473	-4.15	8	-1.14	0.127	1834	0.966	0.873	16097	0.972
MCM9	-4.15	8	-1.14	0.127	1835	0.966	0.873	16096	0.972
UBE2J2	-4.15	8	-1.14	0.127	1836	0.966	0.873	16095	0.972
SLC16A9	-4.14	8	-1.14	0.127	1837	0.966	0.873	16094	0.972
CHCHD4	-4.14	8	-1.14	0.127	1838	0.966	0.873	16093	0.972
KLHL32	-4.14	8	-1.14	0.127	1839	0.966	0.873	16092	0.972
LRRC36	-4.14	8	-1.14	0.127	1840	0.966	0.873	16091	0.972
ZNF101	-4.14	8	-1.14	0.127	1841	0.966	0.873	16090	0.972
FAM109A	-4.14	8	-1.14	0.127	1842	0.966	0.873	16089	0.972
RNPS1	-4.14	8	-1.14	0.127	1843	0.966	0.873	16088	0.972
TM4SF18	-4.14	8	-1.14	0.127	1844	0.966	0.873	16087	0.972
SAMD4B	-4.14	8	-1.14	0.128	1845	0.966	0.872	16086	0.972
C1orf94	-4.14	8	-1.14	0.128	1846	0.966	0.872	16085	0.972
SCRIB	-4.14	8	-1.14	0.128	1847	0.966	0.872	16084	0.972
SPEN	-4.14	8	-1.14	0.128	1848	0.966	0.872	16083	0.972
GPR55	-4.14	8	-1.14	0.128	1849	0.966	0.872	16082	0.972
TCHHL1	-4.14	8	-1.14	0.128	1850	0.966	0.872	16081	0.972
CNOT8	-4.13	8	-1.14	0.128	1851	0.966	0.872	16080	0.972
SCYL3	-4.13	8	-1.14	0.128	1852	0.966	0.872	16079	0.972
RPS20	-2.06	2	-1.14	0.128	1853	0.966	0.872	16078	0.972
TWISTNB	-4.13	8	-1.14	0.128	1854	0.966	0.872	16077	0.972
WDR6	-4.13	8	-1.14	0.128	1855	0.966	0.872	16076	0.972
LACTB	-4.13	8	-1.13	0.128	1856	0.966	0.872	16075	0.972
UFL1	-4.12	8	-1.13	0.128	1857	0.966	0.872	16074	0.972
CCDC14	-4.12	8	-1.13	0.128	1858	0.966	0.872	16073	0.972
EFNA3	-4.12	8	-1.13	0.129	1859	0.966	0.871	16072	0.972
GTF3C6	-4.12	8	-1.13	0.129	1860	0.966	0.871	16071	0.972
CNTNAP5	-3.85	7	-1.13	0.129	1861	0.966	0.871	16070	0.972
ATP8B3	-4.12	8	-1.13	0.129	1862	0.966	0.871	16069	0.972
NR2C2AP	-4.12	8	-1.13	0.129	1863	0.966	0.871	16068	0.972
ENTPD4	-3.56	6	-1.13	0.129	1864	0.966	0.871	16067	0.972
C1orf100	-4.11	8	-1.13	0.129	1865	0.966	0.871	16066	0.972
SMG8	-4.11	8	-1.13	0.129	1866	0.966	0.871	16065	0.972
ZNF554	-4.11	8	-1.13	0.129	1867	0.966	0.871	16064	0.972
SIAE	-4.11	8	-1.13	0.129	1868	0.966	0.871	16063	0.972
ZNF558	-4.11	8	-1.13	0.129	1869	0.966	0.871	16062	0.972
FAM160B1	-4.11	8	-1.13	0.129	1870	0.966	0.871	16061	0.972
CENPA	-4.11	8	-1.13	0.129	1871	0.966	0.871	16060	0.972
TUFM	-4.11	8	-1.13	0.129	1872	0.966	0.871	16059	0.972
CLYBL	-4.11	8	-1.13	0.129	1873	0.966	0.871	16058	0.972
MRI1	-4.11	8	-1.13	0.13	1874	0.966	0.87	16057	0.972
KXD1	-4.1	8	-1.13	0.13	1875	0.966	0.87	16056	0.972
OGDH	-4.1	8	-1.13	0.13	1876	0.966	0.87	16055	0.972
RARG	-4.1	8	-1.13	0.13	1877	0.966	0.87	16054	0.972
APEH	-4.1	8	-1.13	0.13	1878	0.966	0.87	16053	0.972
PAQR3	-4.1	8	-1.13	0.13	1879	0.966	0.87	16052	0.972
TMEM5	-4.1	8	-1.13	0.13	1880	0.966	0.87	16051	0.972
FAM101A	-4.1	8	-1.13	0.13	1881	0.966	0.87	16050	0.972
LCMT1	-4.1	8	-1.13	0.13	1882	0.966	0.87	16049	0.972
PLAC9	-4.1	8	-1.13	0.13	1883	0.966	0.87	16048	0.972
WDR24	-4.1	8	-1.13	0.13	1884	0.966	0.87	16047	0.972
PSMB1	-4.09	8	-1.13	0.13	1885	0.966	0.87	16046	0.972
CRKL	-4.09	8	-1.13	0.13	1886	0.966	0.87	16045	0.972
TPH2	-4.09	8	-1.13	0.13	1887	0.966	0.87	16044	0.972
NRF1	-4.09	8	-1.12	0.13	1888	0.966	0.87	16043	0.972
ARNT2	-4.09	8	-1.12	0.13	1889	0.966	0.87	16042	0.972
BNIP3	-4.09	8	-1.12	0.13	1890	0.966	0.87	16041	0.972
RGS8	-4.09	8	-1.12	0.131	1891	0.966	0.869	16040	0.972
S100A2	-4.09	8	-1.12	0.131	1892	0.966	0.869	16039	0.972
TSNAX	-4.08	8	-1.12	0.131	1893	0.966	0.869	16038	0.972
PGP	-4.08	8	-1.12	0.131	1894	0.966	0.869	16037	0.972
CSHL1	-3.53	6	-1.12	0.131	1895	0.966	0.869	16036	0.972
CD274	-4.08	8	-1.12	0.131	1896	0.966	0.869	16035	0.971
KIF17	-4.08	8	-1.12	0.131	1897	0.966	0.869	16034	0.971
TRIP11	-4.08	8	-1.12	0.131	1898	0.966	0.869	16033	0.971
ZSCAN1	-4.08	8	-1.12	0.131	1899	0.966	0.869	16032	0.971
TPPP2	-4.08	8	-1.12	0.131	1900	0.966	0.869	16031	0.971
UAP1L1	-4.08	8	-1.12	0.131	1901	0.966	0.869	16030	0.971
SHCBP1L	-4.07	8	-1.12	0.131	1902	0.966	0.869	16029	0.971
TELO2	-4.07	8	-1.12	0.132	1903	0.966	0.868	16028	0.971
ACTL7B	-4.07	8	-1.12	0.132	1904	0.966	0.868	16027	0.971
TRIM7	-4.07	8	-1.12	0.132	1905	0.966	0.868	16026	0.971
NDUFAF3	-4.07	8	-1.12	0.132	1906	0.966	0.868	16025	0.971
EHD4	-4.07	8	-1.12	0.132	1907	0.966	0.868	16024	0.971
DNMT1	-4.07	8	-1.12	0.132	1908	0.966	0.868	16023	0.971
LRSAM1	-4.07	8	-1.12	0.132	1909	0.966	0.868	16022	0.971
DEPTOR	-4.07	8	-1.12	0.132	1910	0.966	0.868	16021	0.971
LHB	-4.07	8	-1.12	0.132	1911	0.966	0.868	16020	0.971
GJB6	-4.06	8	-1.12	0.132	1912	0.966	0.868	16019	0.971
MRPS14	-4.06	8	-1.12	0.132	1913	0.966	0.868	16018	0.971
LRRC8A	-4.06	8	-1.12	0.132	1914	0.966	0.868	16017	0.971
HAUS3	-4.06	8	-1.12	0.132	1915	0.966	0.868	16016	0.971
DOK6	-4.06	8	-1.12	0.132	1916	0.966	0.868	16015	0.971
TRPS1	-4.06	8	-1.12	0.132	1917	0.966	0.868	16014	0.971
MOGS	-4.06	8	-1.12	0.132	1918	0.966	0.868	16013	0.971
PTGDS	-4.06	8	-1.12	0.132	1919	0.966	0.868	16012	0.971
KLF3	-4.06	8	-1.12	0.132	1920	0.966	0.868	16011	0.971
ARHGAP9	-4.06	8	-1.12	0.132	1921	0.966	0.868	16010	0.971
TESC	-4.05	8	-1.11	0.133	1922	0.966	0.867	16009	0.971
CXorf56	-4.05	8	-1.11	0.133	1923	0.966	0.867	16008	0.971
FAM212A	-3.51	6	-1.11	0.133	1924	0.966	0.867	16007	0.971
SEMA6C	-4.05	8	-1.11	0.133	1925	0.966	0.867	16006	0.971
ARL5B	-4.05	8	-1.11	0.133	1926	0.966	0.867	16005	0.971
B4GALT4	-4.05	8	-1.11	0.133	1927	0.966	0.867	16004	0.971
RNF216	-4.05	8	-1.11	0.133	1928	0.966	0.867	16003	0.971
KIFC2	-4.05	8	-1.11	0.133	1929	0.966	0.867	16002	0.971
SNRNP40	-4.05	8	-1.11	0.133	1930	0.966	0.867	16001	0.971
TFE3	-4.05	8	-1.11	0.133	1931	0.966	0.867	16000	0.971
PYROXD1	-4.05	8	-1.11	0.133	1932	0.966	0.867	15999	0.971
OIT3	-4.05	8	-1.11	0.133	1933	0.966	0.867	15998	0.971
RGN	-4.04	8	-1.11	0.133	1934	0.966	0.867	15997	0.971
PVRL4	-4.04	8	-1.11	0.133	1935	0.966	0.867	15996	0.971
BNIPL	-3.78	7	-1.11	0.133	1936	0.966	0.867	15995	0.971
SDCCAG3	-4.04	8	-1.11	0.133	1937	0.966	0.867	15994	0.971
P2RX6	-4.04	8	-1.11	0.133	1938	0.966	0.867	15993	0.971
EXOSC4	-4.04	8	-1.11	0.133	1939	0.966	0.867	15992	0.971
POLR3C	-4.04	8	-1.11	0.134	1940	0.966	0.866	15991	0.971
TMEM235	-4.04	8	-1.11	0.134	1941	0.966	0.866	15990	0.971
VMP1	-4.04	8	-1.11	0.134	1942	0.966	0.866	15989	0.971
TM7SF3	-4.04	8	-1.11	0.134	1943	0.966	0.866	15988	0.971
KIAA1009	-4.04	8	-1.11	0.134	1944	0.966	0.866	15987	0.971
ZNF184	-4.04	8	-1.11	0.134	1945	0.966	0.866	15986	0.971
ZBTB8B	-4.04	8	-1.11	0.134	1946	0.966	0.866	15985	0.971
WIBG	-4.03	8	-1.11	0.134	1947	0.966	0.866	15984	0.971
EXOG	-4.03	8	-1.11	0.134	1948	0.966	0.866	15983	0.971
USP3	-4.03	8	-1.11	0.134	1949	0.966	0.866	15982	0.971
ZNF500	-4.03	8	-1.11	0.134	1950	0.966	0.866	15981	0.971
UBE2H	-4.03	8	-1.11	0.134	1951	0.966	0.866	15980	0.971
AAGAB	-4.03	8	-1.11	0.134	1952	0.966	0.866	15979	0.971
KIAA1549L	-4.03	8	-1.11	0.134	1953	0.966	0.866	15978	0.971
ZC3H11A	-4.03	8	-1.11	0.134	1954	0.966	0.866	15977	0.971
CNST	-4.03	8	-1.11	0.134	1955	0.966	0.866	15976	0.971
UPP1	-4.03	8	-1.11	0.134	1956	0.966	0.866	15975	0.971
GPR137B	-4.03	8	-1.11	0.134	1957	0.966	0.866	15974	0.971
PRSS38	-4.02	8	-1.11	0.135	1958	0.966	0.865	15973	0.971
COG2	-4.02	8	-1.11	0.135	1959	0.966	0.865	15972	0.971
SFRP5	-4.02	8	-1.11	0.135	1960	0.966	0.865	15971	0.971
JUN	-4.02	8	-1.11	0.135	1961	0.966	0.865	15970	0.971
HELQ	-4.02	8	-1.1	0.135	1962	0.966	0.865	15969	0.971
EGFR	-4.02	8	-1.1	0.135	1963	0.966	0.865	15968	0.971
CHMP5	-4.02	8	-1.1	0.135	1964	0.966	0.865	15967	0.971
PDP2	-4.02	8	-1.1	0.135	1965	0.966	0.865	15966	0.971
LGI1	-4.02	8	-1.1	0.135	1966	0.966	0.865	15965	0.971
PRDX4	-4.01	8	-1.1	0.135	1967	0.966	0.865	15964	0.971
TTLL10	-4.01	8	-1.1	0.135	1968	0.966	0.865	15963	0.971
PRSS21	-4.01	8	-1.1	0.135	1969	0.966	0.865	15962	0.971
TOR2A	-4.01	8	-1.1	0.135	1970	0.966	0.865	15961	0.971
VSIG10	-4.01	8	-1.1	0.135	1971	0.966	0.865	15960	0.971
ZNF683	-4.01	8	-1.1	0.136	1972	0.966	0.864	15959	0.971
ZNF557	-4.01	8	-1.1	0.136	1973	0.966	0.864	15958	0.971
GRK1	-4.01	8	-1.1	0.136	1974	0.966	0.864	15957	0.971
2021-03-01	-4	8	-1.1	0.136	1975	0.966	0.864	15956	0.971
ACY3	-4	8	-1.1	0.136	1976	0.966	0.864	15955	0.971
KLK7	-4	8	-1.1	0.136	1977	0.966	0.864	15954	0.971
IL27RA	-4	8	-1.1	0.136	1978	0.966	0.864	15953	0.971
CFHR4	-4	8	-1.1	0.136	1979	0.966	0.864	15952	0.971
EPHA5	-4	8	-1.1	0.136	1980	0.966	0.864	15951	0.971
LARP6	-4	8	-1.1	0.136	1981	0.966	0.864	15950	0.971
ANKRD29	-4	8	-1.1	0.136	1982	0.966	0.864	15949	0.971
FLVCR1	-4	8	-1.1	0.136	1983	0.966	0.864	15948	0.971
MZT1	-2.82	4	-1.1	0.136	1984	0.966	0.864	15947	0.971
PKNOX1	-3.99	8	-1.1	0.136	1985	0.966	0.864	15946	0.971
FAM78A	-3.99	8	-1.1	0.137	1986	0.966	0.863	15945	0.971
ARHGAP30	-3.99	8	-1.1	0.137	1987	0.966	0.863	15944	0.971
ULK3	-3.99	8	-1.1	0.137	1988	0.966	0.863	15943	0.971
TTC18	-3.99	8	-1.1	0.137	1989	0.966	0.863	15942	0.971
STX6	-3.99	8	-1.1	0.137	1990	0.966	0.863	15941	0.971
FBP1	-3.99	8	-1.09	0.137	1991	0.966	0.863	15940	0.971
ERCC6L2	-3.99	8	-1.09	0.137	1992	0.966	0.863	15939	0.971
HABP2	-3.99	8	-1.09	0.137	1993	0.966	0.863	15938	0.971
C8orf58	-3.99	8	-1.09	0.137	1994	0.966	0.863	15937	0.971
AQP4	-3.98	8	-1.09	0.137	1995	0.966	0.863	15936	0.971
SEMA6B	-3.98	8	-1.09	0.137	1996	0.966	0.863	15935	0.971
GATAD1	-3.98	8	-1.09	0.137	1997	0.966	0.863	15934	0.971
PTPN6	-3.98	8	-1.09	0.137	1998	0.966	0.863	15933	0.971
ALDH2	-3.98	8	-1.09	0.137	1999	0.966	0.863	15932	0.971
[truncated: 15,931 more rows]

## Sheet: Supplementary File 1d
GENE	sumZ	numObs	normZ	pval_synth	rank_synth	fdr_synth	pval_supp	rank_supp	fdr_supp
PARP1	-48.66	8	-13.08	2.2e-39	1	3.95e-35	1	17928	1
IMP3	-29.36	8	-7.87	1.83e-15	2	1.54e-11	1	17927	1
CDC123	-29.2	8	-7.82	2.58e-15	3	1.54e-11	1	17926	1
RCL1	-27.72	8	-7.42	5.7e-14	4	2.56e-10	1	17925	1
WDR43	-25.95	8	-6.94	1.9e-12	5	6.8e-09	1	17924	1
POP7	-25.67	8	-6.87	3.23e-12	6	9.65e-09	1	17923	1
HEATR1	-24.01	8	-6.42	6.74e-11	7	1.73e-07	1	17922	1
RPS5	-23.42	8	-6.26	1.91e-10	8	4.28e-07	1	17921	1
CDK9	-23.29	8	-6.23	2.4e-10	9	4.74e-07	1	17920	1
DDX3X	-23.23	8	-6.21	2.64e-10	10	4.74e-07	1	17919	1
SPCS3	-22.2	8	-5.93	1.49e-09	11	2.43e-06	1	17918	1
UTP3	-21.83	8	-5.83	2.77e-09	12	4.13e-06	1	17917	1
RPL3	-21.76	8	-5.81	3.05e-09	13	4.21e-06	1	17916	1
NOP58	-18.67	6	-5.76	4.25e-09	14	5.45e-06	1	17915	1
POP5	-21.01	8	-5.61	1.01e-08	15	1.16e-05	1	17914	1
FBL	-20.99	8	-5.61	1.04e-08	16	1.16e-05	1	17913	1
EIF2B1	-20.88	8	-5.58	1.23e-08	17	1.3e-05	1	17912	1
RPL14	-20.4	8	-5.44	2.6e-08	18	2.59e-05	1	17911	1
NVL	-20.25	8	-5.4	3.25e-08	19	3.07e-05	1	17910	1
POLR1B	-20.04	8	-5.35	4.45e-08	20	3.99e-05	1	17909	1
PES1	-19.55	8	-5.22	9.12e-08	21	7.79e-05	1	17908	1
DHDDS	-19.47	8	-5.19	1.03e-07	22	8.43e-05	1	17907	1
ATP2A2	-19.42	8	-5.18	1.11e-07	23	8.63e-05	1	17906	1
RPS16	-19.3	8	-5.15	1.32e-07	24	9.86e-05	1	17905	1
DDX24	-19.11	8	-5.1	1.73e-07	25	0.000124	1	17904	1
EIF3I	-18.85	8	-5.03	2.48e-07	26	0.000171	1	17903	1
SAP18	-18.62	8	-4.97	3.43e-07	27	0.000228	1	17902	1
DKC1	-18.44	8	-4.91	4.45e-07	28	0.000285	1	17901	1
EIF3A	-18.28	8	-4.87	5.52e-07	29	0.000341	1	17900	1
CIRH1A	-18.25	8	-4.86	5.74e-07	30	0.000343	1	17899	1
EIF3D	-18.19	8	-4.85	6.21e-07	31	0.000359	1	17898	1
RPL10A	-15.6	6	-4.8	7.93e-07	32	0.000439	1	17897	1
POLR3B	-18	8	-4.8	8.08e-07	33	0.000439	1	17896	1
PHB2	-17.88	8	-4.77	9.4e-07	34	0.000496	1	17895	1
SARS	-17.81	8	-4.75	1.04e-06	35	0.00053	1	17894	1
C18orf21	-17.71	8	-4.72	1.18e-06	36	0.000587	1	17893	1
TSR1	-17.64	8	-4.7	1.3e-06	37	0.000632	1	17892	1
YARS	-17.56	8	-4.68	1.44e-06	38	0.000679	1	17891	1
NGDN	-17.35	8	-4.62	1.9e-06	39	0.000873	1	17890	1
C3orf17	-17.17	8	-4.57	2.41e-06	40	0.00108	1	17889	1
EXOSC7	-17.13	8	-4.56	2.54e-06	41	0.00111	1	17888	1
URB1	-17.02	8	-4.53	2.92e-06	42	0.00123	1	17887	1
RPL8	-17.01	8	-4.53	2.97e-06	43	0.00123	1	17886	1
WBSCR22	-16.99	8	-4.52	3.02e-06	44	0.00123	1	17885	1
RPS2	-16.85	8	-4.49	3.6e-06	45	0.00144	1	17884	1
TNKS2	-16.8	8	-4.47	3.83e-06	46	0.00149	1	17883	1
UBA52	-14.53	6	-4.47	3.97e-06	47	0.00151	1	17882	1
DDOST	-16.71	8	-4.45	4.34e-06	48	0.0016	1	17881	1
RPS11	-16.7	8	-4.45	4.36e-06	49	0.0016	1	17880	1
RPP30	-16.54	8	-4.4	5.32e-06	50	0.00191	1	17879	1
EXOSC3	-16.49	8	-4.39	5.71e-06	51	0.00201	1	17878	1
OXA1L	-16.46	8	-4.38	5.94e-06	52	0.00205	1	17877	1
RPSA	-16.32	8	-4.34	7.04e-06	53	0.00238	1	17876	1
DDX55	-16.3	8	-4.34	7.19e-06	54	0.00239	1	17875	1
ALG2	-16.19	8	-4.31	8.27e-06	55	0.00269	1	17874	1
NARS	-16.16	8	-4.3	8.54e-06	56	0.00273	1	17873	1
RPL18A	-13.98	6	-4.3	8.71e-06	57	0.00274	1	17872	1
POLR1C	-16.03	8	-4.27	9.95e-06	58	0.00306	1	17871	1
EIF2B5	-16.02	8	-4.26	1.01e-05	59	0.00306	1	17870	1
NOB1	-15.86	8	-4.22	1.23e-05	60	0.00368	1	17869	1
DDX21	-15.68	8	-4.17	1.52e-05	61	0.00446	1	17868	1
CCT3	-15.55	8	-4.13	1.78e-05	62	0.00514	1	17867	1
POLR3A	-15.49	8	-4.12	1.89e-05	63	0.00539	1	17866	1
DHX37	-15.41	8	-4.1	2.08e-05	64	0.00583	1	17865	1
TSEN34	-15.35	8	-4.08	2.25e-05	65	0.00614	1	17864	1
EIF3G	-15.33	8	-4.08	2.29e-05	66	0.00614	1	17863	1
SDAD1	-15.33	8	-4.08	2.3e-05	67	0.00614	1	17862	1
RPS3A	-10.78	4	-4.05	2.53e-05	68	0.00667	1	17861	1
PDCD11	-15.18	8	-4.04	2.71e-05	69	0.00705	1	17860	1
EIF2B2	-15.17	8	-4.03	2.77e-05	70	0.00709	1	17859	1
LTV1	-15.12	8	-4.02	2.93e-05	71	0.0074	1	17858	1
EIF2S1	-15.06	8	-4	3.11e-05	72	0.00776	1	17857	1
CPSF4	-15.02	8	-3.99	3.26e-05	73	0.008	1	17856	1
VARS	-15	8	-3.99	3.34e-05	74	0.00809	1	17855	1
TAF1A	-14.98	8	-3.98	3.42e-05	75	0.00819	1	17854	1
TRAPPC11	-14.97	8	-3.98	3.48e-05	76	0.00821	1	17853	1
RPS15A	-10.57	4	-3.97	3.57e-05	77	0.00831	1	17852	1
UTP23	-14.93	8	-3.97	3.63e-05	78	0.00834	1	17851	1
RANGAP1	-14.8	8	-3.93	4.22e-05	79	0.00948	1	17850	1
NLE1	-14.79	8	-3.93	4.27e-05	80	0.00948	1	17849	1
HSPA5	-14.78	8	-3.93	4.28e-05	81	0.00948	1	17848	1
ZBTB17	-14.6	8	-3.88	5.25e-05	82	0.0115	1	17847	1
TSEN54	-14.58	8	-3.87	5.34e-05	83	0.0115	1	17846	1
HYOU1	-14.47	8	-3.84	6.08e-05	84	0.013	1	17845	1
NOL6	-14.4	8	-3.83	6.52e-05	85	0.0137	1	17844	1
NOM1	-14.28	8	-3.79	7.47e-05	86	0.0156	1	17843	1
EXOSC4	-14.25	8	-3.78	7.72e-05	87	0.0156	1	17842	1
NOL11	-14.25	8	-3.78	7.74e-05	88	0.0156	1	17841	1
ACTL6A	-13.32	7	-3.78	7.77e-05	89	0.0156	1	17840	1
AATF	-14.24	8	-3.78	7.81e-05	90	0.0156	1	17839	1
TSEN2	-14.22	8	-3.78	7.94e-05	91	0.0157	1	17838	1
NOC4L	-14.21	8	-3.77	8.03e-05	92	0.0157	1	17837	1
EXOSC5	-14.07	8	-3.74	9.36e-05	93	0.018	1	17836	1
POLR1A	-14.06	8	-3.73	9.47e-05	94	0.018	1	17835	1
RPS23	-14.05	8	-3.73	9.52e-05	95	0.018	1	17834	1
EIF2B4	-13.99	8	-3.71	0.000102	96	0.019	1	17833	1
EXOSC2	-13.98	8	-3.71	0.000103	97	0.019	1	17832	1
RCC1	-13.94	8	-3.7	0.000108	98	0.0197	1	17831	1
ABT1	-13.92	8	-3.7	0.00011	99	0.0198	1	17830	1
XRCC5	-13.87	8	-3.68	0.000116	100	0.0208	1	17829	1
KARS	-13.85	8	-3.68	0.000119	101	0.0211	1	17828	1
CINP	-13.81	8	-3.67	0.000124	102	0.0217	1	17827	1
C9orf114	-13.78	8	-3.66	0.000127	103	0.0221	1	17826	1
HSPA9	-13.78	8	-3.66	0.000128	104	0.0221	1	17825	1
CCT6A	-13.73	8	-3.64	0.000134	105	0.0229	1	17824	1
NOP16	-13.68	8	-3.63	0.000142	106	0.024	1	17823	1
BYSL	-13.62	8	-3.61	0.000151	107	0.0253	1	17822	1
NARFL	-13.61	8	-3.61	0.000153	108	0.0254	1	17821	1
QARS	-13.58	8	-3.6	0.000157	109	0.0257	1	17820	1
TSR2	-13.56	8	-3.6	0.00016	110	0.026	1	17819	1
UTP20	-13.56	8	-3.6	0.000161	111	0.026	1	17818	1
CAMK2G	-13.55	8	-3.6	0.000162	112	0.026	1	17817	1
RRP7A	-13.48	8	-3.58	0.000174	113	0.0276	1	17816	1
MPHOSPH10	-13.33	8	-3.53	0.000204	114	0.0321	1	17815	1
ETF1	-13.26	8	-3.52	0.000219	115	0.0341	1	17814	1
RPS3	-13.22	8	-3.51	0.000227	116	0.0346	1	17813	1
RPS18	-9.35	4	-3.51	0.000228	117	0.0346	1	17812	1
ANKLE2	-13.22	8	-3.51	0.000228	118	0.0346	1	17811	1
AAMP	-13.09	8	-3.47	0.000259	119	0.0388	1	17810	1
RRP9	-13.09	8	-3.47	0.00026	120	0.0388	1	17809	1
DAD1	-13.05	8	-3.46	0.000269	121	0.0399	1	17808	1
FARSA	-13.03	8	-3.46	0.000275	122	0.0402	1	17807	1
NOP56	-13.01	8	-3.45	0.00028	123	0.0402	1	17806	1
SCFD1	-13.01	8	-3.45	0.000281	124	0.0402	1	17805	1
RPS19	-11.27	6	-3.45	0.000282	125	0.0402	1	17804	1
TAF8	-13.01	8	-3.45	0.000283	126	0.0402	1	17803	1
PSMD11	-12.93	8	-3.43	0.000305	127	0.0431	1	17802	1
URB2	-12.82	8	-3.4	0.000341	128	0.0477	1	17801	1
ALG11	-12.81	8	-3.39	0.000345	129	0.0477	1	17800	1
POLR3H	-12.8	8	-3.39	0.000346	130	0.0477	1	17799	1
IRS2	-12.78	8	-3.39	0.000354	131	0.0484	1	17798	1
CCT7	-12.71	8	-3.37	0.000379	132	0.0514	1	17797	1
RIC8A	-12.68	8	-3.36	0.000389	133	0.0524	1	17796	1
GINS3	-12.59	8	-3.34	0.000426	134	0.057	1	17795	1
RPL12	-12.53	8	-3.32	0.000451	135	0.06	1	17794	1
RPL27A	-12.47	8	-3.3	0.000478	136	0.0631	1	17793	1
BANF1	-12.39	8	-3.28	0.000518	137	0.0663	0.999	17792	1
EIF4A1	-12.38	8	-3.28	0.000519	138	0.0663	0.999	17791	1
TAF3	-12.38	8	-3.28	0.00052	139	0.0663	0.999	17790	1
DDX59	-10.72	6	-3.28	0.000522	140	0.0663	0.999	17789	1
EIF5B	-12.37	8	-3.28	0.000525	141	0.0663	0.999	17788	1
IMP4	-12.36	8	-3.27	0.000529	142	0.0663	0.999	17787	1
DHX33	-12.36	8	-3.27	0.000532	143	0.0663	0.999	17786	1
RPP14	-12.36	8	-3.27	0.000533	144	0.0663	0.999	17785	1
C12orf45	-12.29	8	-3.25	0.000568	145	0.0702	0.999	17784	1
NXT1	-12.22	8	-3.24	0.000606	146	0.0739	0.999	17783	1
CHRM3	-12.22	8	-3.24	0.000606	147	0.0739	0.999	17782	1
LSG1	-12.2	8	-3.23	0.000617	148	0.0748	0.999	17781	1
GSPT1	-12.19	8	-3.23	0.000625	149	0.0752	0.999	17780	1
RPL32	-6.09	2	-3.22	0.000634	150	0.0757	0.999	17779	1
CSTF1	-12.17	8	-3.22	0.000639	151	0.0758	0.999	17778	1
RPS13	-12.11	8	-3.21	0.000671	152	0.0791	0.999	17777	1
CRCP	-12.09	8	-3.2	0.000688	153	0.0807	0.999	17776	1
FUT11	-12.07	8	-3.2	0.000697	154	0.0811	0.999	17775	1
SEC61B	-12.02	8	-3.18	0.000734	155	0.0849	0.999	17774	1
FTSJ3	-12.01	8	-3.18	0.000742	156	0.0853	0.999	17773	1
TRAPPC3	-11.99	8	-3.17	0.000756	157	0.0863	0.999	17772	1
DDX49	-11.92	8	-3.15	0.000804	158	0.0912	0.999	17771	1
NAT10	-11.89	8	-3.15	0.000829	159	0.0933	0.999	17770	1
RPN1	-11.88	8	-3.14	0.000836	160	0.0933	0.999	17769	1
MRP63	-11.87	8	-3.14	0.000838	161	0.0933	0.999	17768	1
ISG20L2	-11.85	8	-3.14	0.000855	162	0.0947	0.999	17767	1
XRCC6	-11.82	8	-3.13	0.000882	163	0.097	0.999	17766	1
TRAPPC4	-11.8	8	-3.12	0.000899	164	0.0983	0.999	17765	1
SPACA4	-11.79	8	-3.12	0.000904	165	0.0983	0.999	17764	1
AIFM2	-11.73	8	-3.1	0.000954	166	0.103	0.999	17763	1
NHP2	-11.66	8	-3.08	0.00102	167	0.109	0.999	17762	1
CPSF6	-10.9	7	-3.08	0.00103	168	0.109	0.999	17761	1
MIXL1	-11.64	8	-3.08	0.00104	169	0.11	0.999	17760	1
CEBPZ	-11.61	8	-3.07	0.00106	170	0.112	0.999	17759	1
RPP21	-11.61	8	-3.07	0.00107	171	0.112	0.999	17758	1
TIMM44	-11.52	8	-3.05	0.00116	172	0.121	0.999	17757	1
WDR46	-11.5	8	-3.04	0.00118	173	0.122	0.999	17756	1
MRPL53	-11.49	8	-3.04	0.00118	174	0.122	0.999	17755	1
WDR12	-11.48	8	-3.04	0.00119	175	0.122	0.999	17754	1
HARS	-11.47	8	-3.03	0.0012	176	0.122	0.999	17753	1
TAF1C	-11.47	8	-3.03	0.00121	177	0.122	0.999	17752	1
TTI2	-11.47	8	-3.03	0.00121	178	0.122	0.999	17751	1
RPS9	-10.71	7	-3.03	0.00124	179	0.124	0.999	17750	1
DRAP1	-11.44	8	-3.02	0.00125	180	0.124	0.999	17749	1
RPP40	-11.39	8	-3.01	0.0013	181	0.128	0.999	17748	1
EEF2	-11.38	8	-3.01	0.00131	182	0.128	0.999	17747	1
NCKIPSD	-11.38	8	-3.01	0.00131	183	0.128	0.999	17746	1
GPN3	-11.35	8	-3	0.00135	184	0.131	0.999	17745	1
RPN2	-11.34	8	-3	0.00136	185	0.132	0.999	17744	1
BOP1	-11.32	8	-2.99	0.00138	186	0.133	0.999	17743	1
RPL30	-7.93	4	-2.96	0.00152	187	0.146	0.998	17742	1
YTHDF2	-11.2	8	-2.96	0.00154	188	0.147	0.998	17741	1
UQCRFS1	-11.16	8	-2.95	0.00159	189	0.151	0.998	17740	1
LRFN1	-11.15	8	-2.95	0.00161	190	0.152	0.998	17739	1
VMP1	-11.14	8	-2.94	0.00162	191	0.152	0.998	17738	1
DNTTIP2	-11.12	8	-2.94	0.00165	192	0.152	0.998	17737	1
MCM5	-11.12	8	-2.94	0.00165	193	0.152	0.998	17736	1
UQCRC1	-11.12	8	-2.94	0.00165	194	0.152	0.998	17735	1
NPPA	-11.11	8	-2.94	0.00166	195	0.152	0.998	17734	1
DNAJC19	-9.62	6	-2.94	0.00167	196	0.152	0.998	17733	1
DDX56	-11.04	8	-2.92	0.00176	197	0.16	0.998	17732	1
ATP5A1	-11.03	8	-2.91	0.00178	198	0.161	0.998	17731	1
SRP9	-11	8	-2.91	0.00182	199	0.163	0.998	17730	1
PSMA7	-9.53	6	-2.91	0.00182	200	0.163	0.998	17729	1
EIF2B3	-11	8	-2.91	0.00183	201	0.163	0.998	17728	1
RPL36	-10.99	8	-2.9	0.00185	202	0.164	0.998	17727	1
EIF1AX	-10.96	8	-2.89	0.0019	203	0.167	0.998	17726	1
PYCR2	-10.95	8	-2.89	0.00191	204	0.167	0.998	17725	1
EXOSC1	-10.91	8	-2.88	0.00198	205	0.173	0.998	17724	1
SACM1L	-10.9	8	-2.88	0.00199	206	0.173	0.998	17723	1
RIOK2	-10.82	8	-2.86	0.00213	207	0.185	0.998	17722	1
ZNF503	-10.79	8	-2.85	0.0022	208	0.189	0.998	17721	1
ZNF259	-10.78	8	-2.85	0.00221	209	0.19	0.998	17720	1
GMPPB	-10.76	8	-2.84	0.00225	210	0.192	0.998	17719	1
TP53BP2	-10.75	8	-2.84	0.00227	211	0.192	0.998	17718	1
AHCTF1	-10.74	8	-2.84	0.00228	212	0.192	0.998	17717	1
DCAF13	-10.71	8	-2.83	0.00234	213	0.197	0.998	17716	1
ARHGAP33	-10.64	8	-2.81	0.00248	214	0.208	0.998	17715	1
MED14	-10.64	8	-2.81	0.00249	215	0.208	0.998	17714	1
ETV2	-10.6	8	-2.8	0.00256	216	0.213	0.997	17713	1
RPL13	-8.37	5	-2.8	0.00259	217	0.214	0.997	17712	1
TFDP1	-10.59	8	-2.79	0.0026	218	0.214	0.997	17711	1
WDR18	-10.55	8	-2.78	0.00268	219	0.219	0.997	17710	1
DDX18	-10.55	8	-2.78	0.00268	220	0.219	0.997	17709	1
UTP14A	-10.54	8	-2.78	0.00269	221	0.219	0.997	17708	1
RRS1	-10.52	8	-2.78	0.00274	222	0.221	0.997	17707	1
BRF1	-10.47	8	-2.76	0.00285	223	0.229	0.997	17706	1
RPL11	-10.44	8	-2.75	0.00294	224	0.235	0.997	17705	1
MCM2	-10.42	8	-2.75	0.00298	225	0.237	0.997	17704	1
TAF5L	-10.42	8	-2.75	0.00299	226	0.237	0.997	17703	1
ARF1	-10.35	8	-2.73	0.00316	227	0.249	0.997	17702	1
AARS	-10.35	8	-2.73	0.00316	228	0.249	0.997	17701	1
NUS1	-10.33	8	-2.73	0.0032	229	0.251	0.997	17700	1
GBP1	-10.3	8	-2.72	0.00329	230	0.256	0.997	17699	1
CCT4	-10.27	8	-2.71	0.00336	231	0.261	0.997	17698	1
VARS2	-10.19	8	-2.69	0.00359	232	0.277	0.996	17697	1
MNAT1	-10.18	8	-2.68	0.00364	233	0.28	0.996	17696	1
PREB	-10.16	8	-2.68	0.00367	234	0.281	0.996	17695	1
SUPT5H	-10.16	8	-2.68	0.00368	235	0.281	0.996	17694	1
NUP62	-10.14	8	-2.67	0.00374	236	0.284	0.996	17693	1
KRR1	-10.12	8	-2.67	0.00382	237	0.289	0.996	17692	1
POLR2J	-7.14	4	-2.66	0.00389	238	0.293	0.996	17691	1
NUP153	-10.09	8	-2.66	0.00391	239	0.293	0.996	17690	1
NUP50	-10.08	8	-2.66	0.00392	240	0.293	0.996	17689	1
MORF4L1	-10.07	8	-2.66	0.00395	241	0.293	0.996	17688	1
MLLT4	-10.07	8	-2.66	0.00395	242	0.293	0.996	17687	1
FLT3LG	-10.05	8	-2.65	0.00403	243	0.298	0.996	17686	1
TBL3	-10.01	8	-2.64	0.00417	244	0.306	0.996	17685	1
NOP9	-10	8	-2.64	0.00418	245	0.306	0.996	17684	1
TADA2B	-10	8	-2.64	0.00419	246	0.306	0.996	17683	1
MYOM3	-9.97	8	-2.63	0.00428	247	0.311	0.996	17682	1
RHOA	-9.95	8	-2.62	0.00436	248	0.315	0.996	17681	1
CAPN1	-9.93	8	-2.62	0.00442	249	0.318	0.996	17680	1
POLRMT	-9.93	8	-2.62	0.00443	250	0.318	0.996	17679	1
GRPEL1	-9.92	8	-2.61	0.00448	251	0.319	0.996	17678	1
PPOX	-8.59	6	-2.61	0.00449	252	0.319	0.996	17677	1
NOP14	-9.9	8	-2.61	0.00452	253	0.32	0.995	17676	1
ALDH2	-9.21	7	-2.6	0.00473	254	0.333	0.995	17675	1
TYW3	-9.85	8	-2.59	0.00473	255	0.333	0.995	17674	1
MTG1	-9.82	8	-2.59	0.00483	256	0.338	0.995	17673	1
EP400NL	-9.82	8	-2.59	0.00484	257	0.338	0.995	17672	1
P2RX7	-9.8	8	-2.58	0.00489	258	0.34	0.995	17671	1
EIF6	-9.78	8	-2.58	0.00497	259	0.344	0.995	17670	1
PPIF	-9.75	8	-2.57	0.0051	260	0.351	0.995	17669	1
YY1	-9.75	8	-2.57	0.00511	261	0.351	0.995	17668	1
TRIM11	-9.74	8	-2.57	0.00515	262	0.352	0.995	17667	1
RPL35A	-8.42	6	-2.56	0.00524	263	0.357	0.995	17666	1
VSX2	-9.71	8	-2.56	0.00526	264	0.357	0.995	17665	1
RPLP0	-9.69	8	-2.55	0.00533	265	0.361	0.995	17664	1
PABPC1	-9.67	8	-2.55	0.00545	266	0.367	0.995	17663	1
GNL3L	-9.66	8	-2.55	0.00546	267	0.367	0.995	17662	1
HOXC6	-9.64	8	-2.54	0.00557	268	0.373	0.994	17661	1
NUP133	-9.62	8	-2.53	0.00564	269	0.375	0.994	17660	1
SPATA5	-9.62	8	-2.53	0.00565	270	0.375	0.994	17659	1
GDF1	-9.59	8	-2.53	0.00578	271	0.383	0.994	17658	1
IKBIP	-9.58	8	-2.52	0.00582	272	0.384	0.994	17657	1
SRPR	-9.56	8	-2.52	0.00593	273	0.39	0.994	17656	1
C1orf53	-9.49	8	-2.5	0.00622	274	0.407	0.994	17655	1
IPO7	-9.47	8	-2.49	0.00632	275	0.412	0.994	17654	1
PRSS57	-9.45	8	-2.49	0.00644	276	0.418	0.994	17653	1
FAM83E	-9.43	8	-2.48	0.00654	277	0.424	0.993	17652	1
CCDC14	-9.42	8	-2.48	0.00659	278	0.425	0.993	17651	1
UTP6	-9.41	8	-2.48	0.00663	279	0.426	0.993	17650	1
DSCC1	-9.4	8	-2.47	0.0067	280	0.428	0.993	17649	1
PABPN1	-9.39	8	-2.47	0.00671	281	0.428	0.993	17648	1
NIP7	-9.35	8	-2.46	0.00695	282	0.442	0.993	17647	1
FUT3	-9.33	8	-2.45	0.00705	283	0.447	0.993	17646	1
RPS8	-8.07	6	-2.45	0.00709	284	0.447	0.993	17645	1
LRR1	-9.31	8	-2.45	0.00712	285	0.447	0.993	17644	1
C20orf24	-9.31	8	-2.45	0.00715	286	0.447	0.993	17643	1
CCNC	-9.31	8	-2.45	0.00715	287	0.447	0.993	17642	1
C14orf93	-9.3	8	-2.45	0.00719	288	0.447	0.993	17641	1
CLCC1	-9.27	8	-2.44	0.00735	289	0.455	0.993	17640	1
MTG2	-9.27	8	-2.44	0.00736	290	0.455	0.993	17639	1
RPLP2	-8.01	6	-2.43	0.00751	291	0.463	0.992	17638	1
ASAH2	-9.24	8	-2.43	0.00754	292	0.463	0.992	17637	1
NUDT17	-9.23	8	-2.43	0.00757	293	0.463	0.992	17636	1
PSMD3	-9.22	8	-2.43	0.00764	294	0.465	0.992	17635	1
MAST1	-9.22	8	-2.43	0.00765	295	0.465	0.992	17634	1
EFNA3	-9.2	8	-2.42	0.00777	296	0.471	0.992	17633	1
TMEM115	-9.18	8	-2.41	0.00788	297	0.476	0.992	17632	1
TRAPPC8	-9.17	8	-2.41	0.00794	298	0.478	0.992	17631	1
EEF1A1	-7.92	6	-2.41	0.00805	299	0.483	0.992	17630	1
BRPF3	-9.11	8	-2.4	0.00829	300	0.495	0.992	17629	1
ESRRA	-9.09	8	-2.39	0.00843	301	0.5	0.992	17628	1
PPA1	-9.09	8	-2.39	0.00844	302	0.5	0.992	17627	1
KLHL26	-9.08	8	-2.39	0.00845	303	0.5	0.992	17626	1
SALL2	-9.07	8	-2.38	0.00857	304	0.505	0.991	17625	1
UTP11L	-9.06	8	-2.38	0.0086	305	0.506	0.991	17624	1
MAU2	-9.05	8	-2.38	0.00865	306	0.506	0.991	17623	1
ELP4	-9.05	8	-2.38	0.00867	307	0.506	0.991	17622	1
BCCIP	-9.03	8	-2.38	0.00877	308	0.51	0.991	17621	1
FXYD5	-9.03	8	-2.37	0.0088	309	0.511	0.991	17620	1
SCNM1	-9.02	8	-2.37	0.00883	310	0.511	0.991	17619	1
PPP1R2	-9.02	8	-2.37	0.00889	311	0.511	0.991	17618	1
CNOT11	-9.02	8	-2.37	0.00889	312	0.511	0.991	17617	1
SMG7	-8.99	8	-2.36	0.00908	313	0.519	0.991	17616	1
PSMB5	-8.98	8	-2.36	0.00909	314	0.519	0.991	17615	1
PSMA4	-8.97	8	-2.36	0.00916	315	0.521	0.991	17614	1
CCDC97	-8.96	8	-2.36	0.00925	316	0.523	0.991	17613	1
RPL19	-8.96	8	-2.36	0.00925	317	0.523	0.991	17612	1
POU2F2	-8.95	8	-2.35	0.00933	318	0.526	0.991	17611	1
LCE3A	-8.93	8	-2.35	0.00943	319	0.53	0.991	17610	1
HIST3H2BB	-8.93	8	-2.35	0.00948	320	0.531	0.991	17609	1
SBNO1	-8.92	8	-2.35	0.00951	321	0.531	0.99	17608	1
TAF12	-8.91	8	-2.34	0.00958	322	0.533	0.99	17607	1
RPL7	-7.7	6	-2.34	0.00973	323	0.54	0.99	17606	1
C2CD4C	-8.87	8	-2.33	0.00991	324	0.548	0.99	17605	1
NUP160	-8.85	8	-2.32	0.01	325	0.553	0.99	17604	1
SLC30A10	-8.84	8	-2.32	0.0101	326	0.553	0.99	17603	1
CDC45	-8.84	8	-2.32	0.0101	327	0.553	0.99	17602	1
TAF10	-8.83	8	-2.32	0.0101	328	0.554	0.99	17601	1
DALRD3	-8.8	8	-2.31	0.0104	329	0.567	0.99	17600	1
DPP7	-8.79	8	-2.31	0.0105	330	0.567	0.99	17599	1
NAV1	-8.78	8	-2.31	0.0105	331	0.567	0.989	17598	1
GINS2	-8.78	8	-2.31	0.0105	332	0.567	0.989	17597	1
TONSL	-8.78	8	-2.31	0.0105	333	0.567	0.989	17596	1
ZW10	-8.78	8	-2.31	0.0106	334	0.567	0.989	17595	1
HLX	-8.77	8	-2.3	0.0106	335	0.567	0.989	17594	1
TGM1	-8.76	8	-2.3	0.0107	336	0.572	0.989	17593	1
PEAR1	-8.74	8	-2.29	0.0109	337	0.577	0.989	17592	1
TOMM20L	-8.73	8	-2.29	0.0109	338	0.577	0.989	17591	1
C19orf25	-8.73	8	-2.29	0.0109	339	0.577	0.989	17590	1
MRPL15	-8.72	8	-2.29	0.011	340	0.578	0.989	17589	1
PMPCA	-8.72	8	-2.29	0.011	341	0.578	0.989	17588	1
TUBGCP2	-8.72	8	-2.29	0.011	342	0.578	0.989	17587	1
XCR1	-8.7	8	-2.29	0.0111	343	0.58	0.989	17586	1
SKIV2L2	-8.7	8	-2.29	0.0111	344	0.58	0.989	17585	1
ACTR2	-8.69	8	-2.28	0.0112	345	0.582	0.989	17584	1
UPK3BL	-8.67	8	-2.28	0.0114	346	0.59	0.989	17583	1
CLPP	-8.67	8	-2.28	0.0114	347	0.59	0.989	17582	1
SERTAD1	-8.66	8	-2.27	0.0115	348	0.593	0.988	17581	1
LBR	-8.65	8	-2.27	0.0115	349	0.593	0.988	17580	1
EIF3B	-8.65	8	-2.27	0.0116	350	0.593	0.988	17579	1
TRMT112	-8.64	8	-2.27	0.0116	351	0.593	0.988	17578	1
APEX1	-8.62	8	-2.26	0.0118	352	0.599	0.988	17577	1
TCP1	-8.06	7	-2.26	0.0118	353	0.599	0.988	17576	1
ACTR10	-8.62	8	-2.26	0.0118	354	0.599	0.988	17575	1
RPL27	-6.09	4	-2.26	0.0119	355	0.599	0.988	17574	1
DDX51	-8.61	8	-2.26	0.0119	356	0.6	0.988	17573	1
RAE1	-8.6	8	-2.26	0.012	357	0.601	0.988	17572	1
FGFBP3	-8.6	8	-2.26	0.012	358	0.601	0.988	17571	1
KLF1	-8.59	8	-2.26	0.012	359	0.601	0.988	17570	1
WBP1L	-8.57	8	-2.25	0.0122	360	0.607	0.988	17569	1
EPM2AIP1	-8.57	8	-2.25	0.0122	361	0.607	0.988	17568	1
CSNK1G2	-8.56	8	-2.25	0.0123	362	0.61	0.988	17567	1
RABGGTA	-8.56	8	-2.25	0.0124	363	0.61	0.988	17566	1
STOML1	-8.54	8	-2.24	0.0125	364	0.614	0.988	17565	1
PELP1	-8.54	8	-2.24	0.0125	365	0.614	0.988	17564	1
RRP12	-7.39	6	-2.24	0.0126	366	0.616	0.987	17563	1
SEC61A1	-8.52	8	-2.24	0.0127	367	0.62	0.987	17562	1
SEPHS1	-8.51	8	-2.23	0.0128	368	0.622	0.987	17561	1
MED24	-8.5	8	-2.23	0.0128	369	0.622	0.987	17560	1
H2AFJ	-8.5	8	-2.23	0.0129	370	0.622	0.987	17559	1
FAM89A	-8.49	8	-2.23	0.0129	371	0.622	0.987	17558	1
RRP15	-8.49	8	-2.23	0.0129	372	0.622	0.987	17557	1
CDC42EP5	-8.49	8	-2.23	0.013	373	0.622	0.987	17556	1
CEP170B	-8.48	8	-2.23	0.013	374	0.622	0.987	17555	1
TAF6	-8.48	8	-2.23	0.013	375	0.622	0.987	17554	1
DSTYK	-8.48	8	-2.22	0.0131	376	0.622	0.987	17553	1
ZNF236	-8.47	8	-2.22	0.0131	377	0.624	0.987	17552	1
CHST2	-8.46	8	-2.22	0.0132	378	0.625	0.987	17551	1
JUN	-8.44	8	-2.22	0.0134	379	0.63	0.987	17550	1
FAM69A	-8.44	8	-2.21	0.0134	380	0.63	0.987	17549	1
LRRC73	-8.44	8	-2.21	0.0134	381	0.63	0.987	17548	1
INCENP	-8.44	8	-2.21	0.0134	382	0.63	0.987	17547	1
TRAPPC1	-8.42	8	-2.21	0.0136	383	0.635	0.986	17546	1
BANP	-8.41	8	-2.21	0.0136	384	0.635	0.986	17545	1
FAM149B1	-8.41	8	-2.21	0.0136	385	0.635	0.986	17544	1
C1orf198	-8.41	8	-2.21	0.0137	386	0.637	0.986	17543	1
ZNF574	-8.37	8	-2.2	0.014	387	0.651	0.986	17542	1
RPS14	-8.36	8	-2.19	0.0142	388	0.654	0.986	17541	1
KANK4	-8.36	8	-2.19	0.0142	389	0.654	0.986	17540	1
TRAF3	-8.34	8	-2.19	0.0143	390	0.659	0.986	17539	1
LRRC20	-8.33	8	-2.19	0.0144	391	0.659	0.986	17538	1
C12orf71	-8.33	8	-2.19	0.0144	392	0.659	0.986	17537	1
MAK16	-8.32	8	-2.18	0.0145	393	0.661	0.986	17536	1
UTP15	-8.32	8	-2.18	0.0145	394	0.662	0.985	17535	1
GTF2E1	-8.3	8	-2.18	0.0147	395	0.665	0.985	17534	1
ARHGEF11	-8.3	8	-2.18	0.0147	396	0.665	0.985	17533	1
PSMA6	-8.3	8	-2.18	0.0147	397	0.665	0.985	17532	1
TOMM20	-8.3	8	-2.18	0.0148	398	0.665	0.985	17531	1
ABCE1	-8.29	8	-2.17	0.0149	399	0.667	0.985	17530	1
NOL10	-8.27	8	-2.17	0.015	400	0.668	0.985	17529	1
LONP1	-8.27	8	-2.17	0.015	401	0.668	0.985	17528	1
NMD3	-8.26	8	-2.17	0.0151	402	0.668	0.985	17527	1
MOS	-8.26	8	-2.17	0.0151	403	0.668	0.985	17526	1
SCAF1	-8.26	8	-2.17	0.0151	404	0.668	0.985	17525	1
ZC3H3	-8.26	8	-2.17	0.0152	405	0.668	0.985	17524	1
RPS19BP1	-8.25	8	-2.16	0.0152	406	0.668	0.985	17523	1
HAPLN4	-8.25	8	-2.16	0.0152	407	0.668	0.985	17522	1
KLHDC9	-8.25	8	-2.16	0.0152	408	0.668	0.985	17521	1
WDR74	-8.25	8	-2.16	0.0152	409	0.668	0.985	17520	1
ATP2C1	-8.25	8	-2.16	0.0153	410	0.669	0.985	17519	1
GZMM	-8.24	8	-2.16	0.0154	411	0.671	0.985	17518	1
PI4K2A	-8.23	8	-2.16	0.0154	412	0.671	0.985	17517	1
DIEXF	-8.23	8	-2.16	0.0155	413	0.672	0.985	17516	1
EXOSC8	-8.22	8	-2.15	0.0156	414	0.676	0.984	17515	1
GUK1	-8.2	8	-2.15	0.0158	415	0.681	0.984	17514	1
CCDC59	-8.2	8	-2.15	0.0158	416	0.682	0.984	17513	1
DNAJB12	-8.19	8	-2.15	0.0159	417	0.683	0.984	17512	1
EXOSC9	-8.18	8	-2.14	0.016	418	0.687	0.984	17511	1
PGLYRP4	-8.17	8	-2.14	0.0161	419	0.687	0.984	17510	1
SLC8A2	-8.17	8	-2.14	0.0161	420	0.688	0.984	17509	1
LAMB2	-8.15	8	-2.14	0.0163	421	0.694	0.984	17508	1
SFPQ	-8.12	8	-2.13	0.0167	422	0.709	0.983	17507	1
NUP93	-8.11	8	-2.12	0.0168	423	0.713	0.983	17506	1
TSSK6	-8.1	8	-2.12	0.0169	424	0.715	0.983	17505	1
RRN3	-8.09	8	-2.12	0.0169	425	0.715	0.983	17504	1
SAR1A	-8.08	8	-2.12	0.0171	426	0.717	0.983	17503	1
KIAA0391	-7.56	7	-2.12	0.0171	427	0.717	0.983	17502	1
UBA7	-8.07	8	-2.12	0.0172	428	0.72	0.983	17501	1
IPP	-8.07	8	-2.11	0.0173	429	0.722	0.983	17500	1
CHPF2	-8.05	8	-2.11	0.0174	430	0.726	0.983	17499	1
EIF3J	-8.05	8	-2.11	0.0175	431	0.726	0.983	17498	1
NUFIP1	-8.05	8	-2.11	0.0175	432	0.726	0.982	17497	1
DPY19L4	-8.04	8	-2.11	0.0176	433	0.726	0.982	17496	1
FIS1	-8.04	8	-2.11	0.0176	434	0.726	0.982	17495	1
PSMD2	-8.03	8	-2.1	0.0177	435	0.73	0.982	17494	1
LMNA	-8.02	8	-2.1	0.0178	436	0.73	0.982	17493	1
TMEM204	-8.01	8	-2.1	0.0179	437	0.736	0.982	17492	1
SLC22A15	-8	8	-2.1	0.018	438	0.738	0.982	17491	1
COX6B1	-8	8	-2.1	0.0181	439	0.738	0.982	17490	1
EXOC8	-7.99	8	-2.09	0.0181	440	0.738	0.982	17489	1
RHOG	-7.99	8	-2.09	0.0182	441	0.738	0.982	17488	1
ZNHIT3	-7.99	8	-2.09	0.0182	442	0.738	0.982	17487	1
ELMO2	-7.98	8	-2.09	0.0183	443	0.739	0.982	17486	1
ACTA1	-7.97	8	-2.09	0.0184	444	0.742	0.982	17485	1
CNTN2	-7.96	8	-2.09	0.0185	445	0.742	0.982	17484	1
RPL18	-7.96	8	-2.09	0.0185	446	0.742	0.981	17483	1
CPVL	-7.96	8	-2.08	0.0185	447	0.742	0.981	17482	1
RHOC	-7.96	8	-2.08	0.0186	448	0.742	0.981	17481	1
TTC5	-7.95	8	-2.08	0.0186	449	0.744	0.981	17480	1
TCF20	-7.94	8	-2.08	0.0187	450	0.746	0.981	17479	1
HFE2	-7.93	8	-2.08	0.0189	451	0.75	0.981	17478	1
ICAM4	-7.93	8	-2.08	0.0189	452	0.75	0.981	17477	1
CUEDC2	-7.93	8	-2.08	0.019	453	0.75	0.981	17476	1
RPL31	-5.6	4	-2.07	0.019	454	0.752	0.981	17475	1
NOL7	-7.91	8	-2.07	0.0192	455	0.756	0.981	17474	1
GJA5	-7.9	8	-2.07	0.0193	456	0.759	0.981	17473	1
SRP68	-7.89	8	-2.07	0.0194	457	0.759	0.981	17472	1
MATN1	-7.89	8	-2.07	0.0194	458	0.759	0.981	17471	1
TPT1	-7.89	8	-2.07	0.0194	459	0.759	0.981	17470	1
LRFN3	-7.88	8	-2.06	0.0195	460	0.759	0.98	17469	1
TRIM67	-7.88	8	-2.06	0.0195	461	0.759	0.98	17468	1
KCNK1	-7.88	8	-2.06	0.0196	462	0.759	0.98	17467	1
RPLP1	-5.56	4	-2.06	0.0197	463	0.764	0.98	17466	1
POLR1D	-7.85	8	-2.06	0.0199	464	0.766	0.98	17465	1
TMEM63A	-7.85	8	-2.06	0.0199	465	0.766	0.98	17464	1
SP3	-7.85	8	-2.06	0.0199	466	0.766	0.98	17463	1
FAM19A3	-7.85	8	-2.05	0.02	467	0.766	0.98	17462	1
CSE1L	-7.85	8	-2.05	0.02	468	0.766	0.98	17461	1
GTPBP4	-7.84	8	-2.05	0.0201	469	0.768	0.98	17460	1
DNAJB1	-7.82	8	-2.05	0.0203	470	0.774	0.98	17459	1
ZSWIM8	-7.81	8	-2.04	0.0205	471	0.78	0.979	17458	1
STRIP1	-7.8	8	-2.04	0.0205	472	0.78	0.979	17457	1
ACTL6B	-7.8	8	-2.04	0.0206	473	0.78	0.979	17456	1
SMYD2	-7.8	8	-2.04	0.0206	474	0.781	0.979	17455	1
ZNF682	-7.79	8	-2.04	0.0207	475	0.781	0.979	17454	1
TSC22D4	-7.79	8	-2.04	0.0207	476	0.781	0.979	17453	1
ATP5B	-7.79	8	-2.04	0.0208	477	0.781	0.979	17452	1
RPL15	-3.89	2	-2.03	0.021	478	0.787	0.979	17451	1
TBC1D14	-7.74	8	-2.03	0.0214	479	0.799	0.979	17450	1
WDR36	-7.74	8	-2.02	0.0214	480	0.8	0.979	17449	1
MUC2	-7.73	8	-2.02	0.0215	481	0.8	0.979	17448	1
FAM71E2	-7.73	8	-2.02	0.0215	482	0.8	0.978	17447	1
SHQ1	-7.72	8	-2.02	0.0217	483	0.802	0.978	17446	1
RPL13A	-5.46	4	-2.02	0.0217	484	0.802	0.978	17445	1
TREML1	-7.72	8	-2.02	0.0217	485	0.802	0.978	17444	1
IGSF3	-7.71	8	-2.02	0.0219	486	0.806	0.978	17443	1
FILIP1L	-7.7	8	-2.02	0.0219	487	0.807	0.978	17442	1
SPRR2G	-7.68	8	-2.01	0.0223	488	0.818	0.978	17441	1
DDX47	-7.67	8	-2.01	0.0223	489	0.818	0.978	17440	1
RIOK3	-7.67	8	-2.01	0.0224	490	0.818	0.978	17439	1
NFS1	-7.67	8	-2.01	0.0224	491	0.818	0.978	17438	1
FAM89B	-7.64	8	-2	0.0229	492	0.831	0.977	17437	1
NSF	-7.64	8	-2	0.0229	493	0.831	0.977	17436	1
DR1	-7.63	8	-2	0.023	494	0.831	0.977	17435	1
C19orf52	-7.63	8	-2	0.023	495	0.831	0.977	17434	1
PCSK4	-6.6	6	-2	0.023	496	0.831	0.977	17433	1
NDUFA13	-7.63	8	-1.99	0.023	497	0.831	0.977	17432	1
ALG1	-7.62	8	-1.99	0.0231	498	0.832	0.977	17431	1
SAMHD1	-7.6	8	-1.99	0.0234	499	0.84	0.977	17430	1
CELF2	-7.6	8	-1.99	0.0235	500	0.84	0.977	17429	1
BET1	-6.58	6	-1.99	0.0235	501	0.84	0.977	17428	1
OLFML3	-7.59	8	-1.98	0.0236	502	0.841	0.976	17427	1
TSC22D2	-7.59	8	-1.98	0.0236	503	0.841	0.976	17426	1
GARS	-7.57	8	-1.98	0.0239	504	0.845	0.976	17425	1
PPP1R8	-7.56	8	-1.98	0.024	505	0.845	0.976	17424	1
TMEM160	-7.56	8	-1.98	0.024	506	0.845	0.976	17423	1
BRD4	-7.56	8	-1.98	0.024	507	0.845	0.976	17422	1
AMH	-7.56	8	-1.98	0.0241	508	0.845	0.976	17421	1
HPN	-7.55	8	-1.98	0.0241	509	0.845	0.976	17420	1
CEBPD	-7.55	8	-1.98	0.0241	510	0.845	0.976	17419	1
MYO1F	-7.55	8	-1.98	0.0241	511	0.845	0.976	17418	1
SPTBN4	-7.55	8	-1.97	0.0242	512	0.845	0.976	17417	1
COMTD1	-7.54	8	-1.97	0.0243	513	0.845	0.976	17416	1
SHISA5	-7.54	8	-1.97	0.0243	514	0.845	0.976	17415	1
DDX52	-7.54	8	-1.97	0.0243	515	0.845	0.976	17414	1
AFG3L2	-7.54	8	-1.97	0.0243	516	0.845	0.976	17413	1
SAFB	-7.53	8	-1.97	0.0245	517	0.846	0.975	17412	1
SNRNP35	-7.53	8	-1.97	0.0245	518	0.846	0.975	17411	1
ACTL7B	-7.53	8	-1.97	0.0245	519	0.846	0.975	17410	1
IL6R	-7.52	8	-1.97	0.0246	520	0.846	0.975	17409	1
SPCS2	-7.52	8	-1.97	0.0246	521	0.846	0.975	17408	1
THAP1	-7.52	8	-1.97	0.0246	522	0.846	0.975	17407	1
AKT1	-7.51	8	-1.96	0.0248	523	0.849	0.975	17406	1
DEGS1	-7.51	8	-1.96	0.0248	524	0.849	0.975	17405	1
CNOT1	-7.5	8	-1.96	0.0249	525	0.849	0.975	17404	1
MRPL51	-7.49	8	-1.96	0.0251	526	0.854	0.975	17403	1
EIF3H	-7.49	8	-1.96	0.0252	527	0.854	0.975	17402	1
SHFM1	-7.49	8	-1.96	0.0252	528	0.854	0.975	17401	1
TRIM63	-7.48	8	-1.96	0.0252	529	0.855	0.975	17400	1
FAM131C	-7.48	8	-1.95	0.0253	530	0.856	0.975	17399	1
PRPF38B	-7.47	8	-1.95	0.0253	531	0.856	0.975	17398	1
UPF1	-6.46	6	-1.95	0.0257	532	0.859	0.974	17397	1
IFLTD1	-7.45	8	-1.95	0.0257	533	0.859	0.974	17396	1
MFSD2A	-7.45	8	-1.95	0.0257	534	0.859	0.974	17395	1
THAP10	-7.45	8	-1.95	0.0257	535	0.859	0.974	17394	1
MMP23B	-7.45	8	-1.95	0.0258	536	0.859	0.974	17393	1
NID1	-7.45	8	-1.95	0.0258	537	0.859	0.974	17392	1
CCNA2	-7.45	8	-1.95	0.0258	538	0.859	0.974	17391	1
RPL35	-7.44	8	-1.95	0.0258	539	0.859	0.974	17390	1
RBBP4	-7.44	8	-1.94	0.0259	540	0.86	0.974	17389	1
SLC7A8	-7.43	8	-1.94	0.026	541	0.861	0.974	17388	1
GRIN2D	-7.43	8	-1.94	0.0261	542	0.861	0.974	17387	1
LMNB2	-7.43	8	-1.94	0.0261	543	0.861	0.974	17386	1
PODNL1	-7.43	8	-1.94	0.0261	544	0.861	0.974	17385	1
EID2B	-7.42	8	-1.94	0.0262	545	0.861	0.974	17384	1
SPTB	-7.42	8	-1.94	0.0263	546	0.861	0.974	17383	1
MON2	-7.42	8	-1.94	0.0263	547	0.861	0.974	17382	1
GPATCH2	-7.41	8	-1.94	0.0263	548	0.861	0.974	17381	1
DCDC2B	-7.41	8	-1.94	0.0265	549	0.861	0.974	17380	1
CACNA2D4	-7.4	8	-1.93	0.0265	550	0.861	0.974	17379	1
DDIT4	-7.4	8	-1.93	0.0265	551	0.861	0.973	17378	1
MFSD12	-7.4	8	-1.93	0.0265	552	0.861	0.973	17377	1
CREB3L4	-7.39	8	-1.93	0.0267	553	0.865	0.973	17376	1
WDR3	-7.37	8	-1.92	0.0272	554	0.877	0.973	17375	1
EIF3F	-7.36	8	-1.92	0.0272	555	0.877	0.973	17374	1
MCM7	-7.36	8	-1.92	0.0272	556	0.877	0.973	17373	1
FBXL6	-7.36	8	-1.92	0.0273	557	0.877	0.973	17372	1
LUC7L	-7.35	8	-1.92	0.0273	558	0.877	0.973	17371	1
REP15	-7.35	8	-1.92	0.0273	559	0.877	0.973	17370	1
IDE	-7.35	8	-1.92	0.0274	560	0.877	0.973	17369	1
JAZF1	-7.34	8	-1.92	0.0275	561	0.878	0.972	17368	1
ATP4A	-7.34	8	-1.92	0.0275	562	0.878	0.972	17367	1
SLC5A5	-7.34	8	-1.92	0.0276	563	0.878	0.972	17366	1
CMTR1	-7.34	8	-1.92	0.0276	564	0.878	0.972	17365	1
TADA1	-7.34	8	-1.92	0.0277	565	0.878	0.972	17364	1
POLR2H	-7.33	8	-1.91	0.0278	566	0.879	0.972	17363	1
UBQLN4	-7.32	8	-1.91	0.0279	567	0.881	0.972	17362	1
FOXL2	-7.32	8	-1.91	0.0279	568	0.881	0.972	17361	1
PMPCB	-7.31	8	-1.91	0.028	569	0.882	0.972	17360	1
ARL6IP5	-7.31	8	-1.91	0.0281	570	0.882	0.972	17359	1
TRNT1	-7.31	8	-1.91	0.0281	571	0.882	0.972	17358	1
XPO1	-6.83	7	-1.91	0.0282	572	0.882	0.972	17357	1
RPP38	-7.3	8	-1.91	0.0282	573	0.882	0.972	17356	1
GPI	-7.29	8	-1.9	0.0284	574	0.885	0.972	17355	1
TMEM130	-7.29	8	-1.9	0.0284	575	0.885	0.972	17354	1
EGLN1	-7.29	8	-1.9	0.0284	576	0.885	0.972	17353	1
ZNF181	-6.31	6	-1.9	0.0286	577	0.887	0.971	17352	1
ANGEL2	-7.28	8	-1.9	0.0287	578	0.889	0.971	17351	1
CCHCR1	-7.27	8	-1.9	0.0289	579	0.894	0.971	17350	1
ANAPC16	-7.26	8	-1.9	0.0289	580	0.894	0.971	17349	1
TBXA2R	-7.26	8	-1.9	0.029	581	0.894	0.971	17348	1
ANO3	-7.26	8	-1.9	0.029	582	0.894	0.971	17347	1
CCNT1	-7.25	8	-1.89	0.0291	583	0.896	0.971	17346	1
PSMC4	-7.25	8	-1.89	0.0292	584	0.896	0.971	17345	1
POLR2L	-7.24	8	-1.89	0.0293	585	0.897	0.971	17344	1
BCL2L12	-7.24	8	-1.89	0.0293	586	0.897	0.971	17343	1
PDE12	-7.23	8	-1.89	0.0296	587	0.903	0.97	17342	1
CHCHD4	-7.22	8	-1.89	0.0296	588	0.903	0.97	17341	1
MTBP	-7.22	8	-1.88	0.0297	589	0.904	0.97	17340	1
TIMM23	-7.22	8	-1.88	0.0298	590	0.904	0.97	17339	1
LMTK3	-7.21	8	-1.88	0.0299	591	0.908	0.97	17338	1
ZNF589	-7.2	8	-1.88	0.03	592	0.909	0.97	17337	1
NUP210	-7.19	8	-1.88	0.0302	593	0.912	0.97	17336	1
XKR8	-7.19	8	-1.88	0.0302	594	0.912	0.97	17335	1
PGGT1B	-7.18	8	-1.88	0.0304	595	0.913	0.97	17334	1
RAB43	-7.18	8	-1.88	0.0304	596	0.913	0.97	17333	1
RPP25L	-7.18	8	-1.87	0.0304	597	0.913	0.97	17332	1
NDUFA4L2	-7.18	8	-1.87	0.0305	598	0.913	0.97	17331	1
SEC16A	-7.17	8	-1.87	0.0307	599	0.918	0.969	17330	1
PRELID1	-7.16	8	-1.87	0.0309	600	0.923	0.969	17329	1
2021-03-02	-10.11	16	-1.87	0.031	601	0.926	0.969	17328	1
BAK1	-7.14	8	-1.86	0.0312	602	0.93	0.969	17327	1
SGSH	-7.13	8	-1.86	0.0314	603	0.932	0.969	17326	1
SMC3	-7.13	8	-1.86	0.0315	604	0.932	0.969	17325	1
PTPRC	-7.13	8	-1.86	0.0315	605	0.932	0.969	17324	1
EXOSC6	-7.12	8	-1.86	0.0316	606	0.936	0.968	17323	1
PSMC3	-7.11	8	-1.86	0.0318	607	0.937	0.968	17322	1
PLCE1	-7.11	8	-1.86	0.0318	608	0.937	0.968	17321	1
JAK3	-7.09	8	-1.85	0.0321	609	0.944	0.968	17320	1
MORN4	-7.09	8	-1.85	0.0321	610	0.944	0.968	17319	1
CHST12	-7.08	8	-1.85	0.0323	611	0.948	0.968	17318	1
ZNF696	-7.07	8	-1.85	0.0325	612	0.948	0.968	17317	1
C1orf65	-7.07	8	-1.85	0.0325	613	0.948	0.968	17316	1
GNB2L1	-7.07	8	-1.85	0.0325	614	0.948	0.967	17315	1
DDN	-7.07	8	-1.84	0.0326	615	0.948	0.967	17314	1
KPNB1	-7.06	8	-1.84	0.0327	616	0.948	0.967	17313	1
ZSCAN18	-7.06	8	-1.84	0.0328	617	0.948	0.967	17312	1
GNL2	-7.06	8	-1.84	0.0328	618	0.948	0.967	17311	1
CDSN	-7.06	8	-1.84	0.0328	619	0.948	0.967	17310	1
CARM1	-7.06	8	-1.84	0.0328	620	0.948	0.967	17309	1
DIP2C	-7.05	8	-1.84	0.0328	621	0.948	0.967	17308	1
PCBP2	-7.05	8	-1.84	0.033	622	0.948	0.967	17307	1
PRRC2A	-7.05	8	-1.84	0.033	623	0.948	0.967	17306	1
HCN3	-7.05	8	-1.84	0.033	624	0.948	0.967	17305	1
OR7A5	-7.04	8	-1.84	0.0331	625	0.95	0.967	17304	1
METRN	-7.04	8	-1.84	0.0332	626	0.951	0.967	17303	1
ZXDC	-7.03	8	-1.83	0.0334	627	0.954	0.967	17302	1
SEC13	-7.03	8	-1.83	0.0334	628	0.954	0.967	17301	1
RING1	-7.02	8	-1.83	0.0336	629	0.957	0.966	17300	1
ILK	-7.01	8	-1.83	0.0337	630	0.959	0.966	17299	1
DNM1L	-7.01	8	-1.83	0.0338	631	0.96	0.966	17298	1
EPHB3	-7	8	-1.83	0.0339	632	0.96	0.966	17297	1
POLR1E	-7	8	-1.83	0.0339	633	0.96	0.966	17296	1
PCBP4	-7	8	-1.83	0.0339	634	0.96	0.966	17295	1
MLLT11	-6.99	8	-1.82	0.0341	635	0.961	0.966	17294	1
ANKLE1	-6.99	8	-1.82	0.0341	636	0.961	0.966	17293	1
ALYREF	-6.99	8	-1.82	0.0341	637	0.961	0.966	17292	1
DPF1	-6.99	8	-1.82	0.0342	638	0.961	0.966	17291	1
FGD1	-6.98	8	-1.82	0.0344	639	0.962	0.966	17290	1
OR10Q1	-6.97	8	-1.82	0.0345	640	0.962	0.966	17289	1
JMJD4	-6.97	8	-1.82	0.0345	641	0.962	0.965	17288	1
MYH6	-6.97	8	-1.82	0.0346	642	0.962	0.965	17287	1
CCDC28B	-6.96	8	-1.82	0.0347	643	0.962	0.965	17286	1
VWA1	-6.96	8	-1.81	0.0348	644	0.962	0.965	17285	1
NELFA	-6.96	8	-1.81	0.0348	645	0.962	0.965	17284	1
NUDT21	-6.95	8	-1.81	0.0349	646	0.962	0.965	17283	1
LTB4R	-6.95	8	-1.81	0.035	647	0.962	0.965	17282	1
CNOT4	-6.95	8	-1.81	0.035	648	0.962	0.965	17281	1
CRABP1	-6.94	8	-1.81	0.0351	649	0.962	0.965	17280	1
COMMD9	-6.94	8	-1.81	0.0351	650	0.962	0.965	17279	1
EGR3	-6.94	8	-1.81	0.0351	651	0.962	0.965	17278	1
LURAP1L	-6.94	8	-1.81	0.0351	652	0.962	0.965	17277	1
ABHD2	-6.94	8	-1.81	0.0352	653	0.962	0.965	17276	1
SLC39A7	-6.94	8	-1.81	0.0352	654	0.962	0.965	17275	1
SEC24C	-6.94	8	-1.81	0.0353	655	0.962	0.965	17274	1
ITGB1	-6.94	8	-1.81	0.0353	656	0.962	0.965	17273	1
PBX2	-6.93	8	-1.81	0.0353	657	0.962	0.965	17272	1
DDR1	-6.93	8	-1.81	0.0353	658	0.962	0.965	17271	1
PPP1R15B	-6.92	8	-1.81	0.0355	659	0.962	0.964	17270	1
CDKN2B	-6.92	8	-1.81	0.0355	660	0.962	0.964	17269	1
PPP3CB	-6.92	8	-1.8	0.0356	661	0.962	0.964	17268	1
LBX1	-6.92	8	-1.8	0.0356	662	0.962	0.964	17267	1
WNT3A	-6.91	8	-1.8	0.0357	663	0.962	0.964	17266	1
SLC7A9	-6.91	8	-1.8	0.0359	664	0.962	0.964	17265	1
RRAGC	-6.91	8	-1.8	0.0359	665	0.962	0.964	17264	1
CHST3	-6.91	8	-1.8	0.0359	666	0.962	0.964	17263	1
MBTD1	-6.91	8	-1.8	0.0359	667	0.962	0.964	17262	1
NOP2	-6.91	8	-1.8	0.0359	668	0.962	0.964	17261	1
GRHL3	-6.9	8	-1.8	0.0359	669	0.962	0.964	17260	1
LTBR	-6.9	8	-1.8	0.036	670	0.962	0.964	17259	1
TMEM39A	-6.9	8	-1.8	0.036	671	0.962	0.964	17258	1
LAMC1	-6.89	8	-1.8	0.0362	672	0.963	0.964	17257	1
PRODH2	-6.89	8	-1.8	0.0362	673	0.963	0.964	17256	1
ADRM1	-6.89	8	-1.8	0.0363	674	0.963	0.964	17255	1
UTF1	-5.96	6	-1.79	0.0363	675	0.963	0.964	17254	1
CACNB4	-6.88	8	-1.79	0.0364	676	0.963	0.964	17253	1
CEND1	-6.88	8	-1.79	0.0365	677	0.963	0.964	17252	1
SLC30A7	-6.88	8	-1.79	0.0365	678	0.963	0.964	17251	1
BTAF1	-6.88	8	-1.79	0.0365	679	0.963	0.964	17250	1
RPL38	-6.88	8	-1.79	0.0365	680	0.963	0.963	17249	1
INPP5E	-6.87	8	-1.79	0.0366	681	0.964	0.963	17248	1
NCF1	-6.87	8	-1.79	0.0367	682	0.964	0.963	17247	1
ROMO1	-6.87	8	-1.79	0.0367	683	0.965	0.963	17246	1
TMED1	-6.86	8	-1.79	0.037	684	0.969	0.963	17245	1
ZNF324	-6.85	8	-1.78	0.0372	685	0.97	0.963	17244	1
SVIP	-4.84	4	-1.78	0.0372	686	0.97	0.963	17243	1
SFT2D2	-6.85	8	-1.78	0.0372	687	0.97	0.963	17242	1
SNX3	-6.84	8	-1.78	0.0373	688	0.97	0.963	17241	1
CITED2	-6.84	8	-1.78	0.0373	689	0.97	0.963	17240	1
RPL23	-6.83	8	-1.78	0.0376	690	0.972	0.962	17239	1
NEK2	-4.83	4	-1.78	0.0376	691	0.972	0.962	17238	1
SHISA7	-6.83	8	-1.78	0.0376	692	0.972	0.962	17237	1
GPRIN2	-6.82	8	-1.78	0.0377	693	0.972	0.962	17236	1
ERLIN2	-6.82	8	-1.78	0.0378	694	0.972	0.962	17235	1
PLEKHG3	-6.81	8	-1.78	0.0379	695	0.972	0.962	17234	1
S100A14	-6.81	8	-1.77	0.038	696	0.972	0.962	17233	1
ANKRD34A	-6.81	8	-1.77	0.0381	697	0.972	0.962	17232	1
PLXNA1	-6.81	8	-1.77	0.0381	698	0.972	0.962	17231	1
BCL2L2	-5.88	6	-1.77	0.0384	699	0.972	0.962	17230	1
KCNJ9	-6.79	8	-1.77	0.0384	700	0.972	0.962	17229	1
TMEM26	-6.79	8	-1.77	0.0384	701	0.972	0.962	17228	1
CENPM	-6.78	8	-1.77	0.0386	702	0.972	0.961	17227	1
GATC	-6.78	8	-1.77	0.0387	703	0.972	0.961	17226	1
NR2F6	-5.86	6	-1.76	0.0389	704	0.972	0.961	17225	1
TESC	-6.77	8	-1.76	0.039	705	0.972	0.961	17224	1
WASL	-6.76	8	-1.76	0.039	706	0.972	0.961	17223	1
PRX	-6.76	8	-1.76	0.0391	707	0.972	0.961	17222	1
OTUD4	-6.76	8	-1.76	0.0391	708	0.972	0.961	17221	1
RBMX	-3.38	2	-1.76	0.0393	709	0.972	0.961	17220	1
RAB3IL1	-6.75	8	-1.76	0.0393	710	0.972	0.961	17219	1
THEMIS2	-6.74	8	-1.76	0.0395	711	0.972	0.96	17218	1
EIF4G1	-6.74	8	-1.76	0.0396	712	0.972	0.96	17217	1
VHLL	-6.74	8	-1.76	0.0396	713	0.972	0.96	17216	1
PAQR6	-6.74	8	-1.76	0.0396	714	0.972	0.96	17215	1
SETD1B	-6.74	8	-1.76	0.0396	715	0.972	0.96	17214	1
ZG16B	-6.74	8	-1.75	0.0397	716	0.972	0.96	17213	1
NDUFS2	-6.73	8	-1.75	0.0397	717	0.972	0.96	17212	1
NUP98	-6.72	8	-1.75	0.04	718	0.972	0.96	17211	1
RPS29	-4.75	4	-1.75	0.0402	719	0.972	0.96	17210	1
COPB2	-6.71	8	-1.75	0.0402	720	0.972	0.96	17209	1
H3F3C	-4.75	4	-1.75	0.0402	721	0.972	0.96	17208	1
BLOC1S2	-6.71	8	-1.75	0.0403	722	0.972	0.96	17207	1
PHLDA3	-6.7	8	-1.75	0.0404	723	0.972	0.96	17206	1
DOK1	-6.7	8	-1.75	0.0405	724	0.972	0.96	17205	1
EIF4E	-6.7	8	-1.74	0.0405	725	0.972	0.959	17204	1
TACSTD2	-6.7	8	-1.74	0.0405	726	0.972	0.959	17203	1
C3orf58	-6.68	8	-1.74	0.0409	727	0.972	0.959	17202	1
FAM195A	-6.68	8	-1.74	0.0409	728	0.972	0.959	17201	1
TBX3	-6.68	8	-1.74	0.0409	729	0.972	0.959	17200	1
ZC2HC1A	-6.68	8	-1.74	0.0409	730	0.972	0.959	17199	1
NOP10	-6.68	8	-1.74	0.0409	731	0.972	0.959	17198	1
ELF5	-6.68	8	-1.74	0.041	732	0.972	0.959	17197	1
STX18	-6.68	8	-1.74	0.0411	733	0.972	0.959	17196	1
RYR1	-6.68	8	-1.74	0.0411	734	0.972	0.959	17195	1
HIF1AN	-6.67	8	-1.74	0.0412	735	0.972	0.959	17194	1
CCDC130	-6.67	8	-1.74	0.0412	736	0.972	0.959	17193	1
EIF5AL1	-5.77	6	-1.74	0.0413	737	0.972	0.959	17192	1
SRP54	-6.65	8	-1.73	0.0417	738	0.972	0.958	17191	0.999
MED26	-6.65	8	-1.73	0.0417	739	0.972	0.958	17190	0.999
CHIT1	-6.65	8	-1.73	0.0418	740	0.972	0.958	17189	0.999
RERE	-6.65	8	-1.73	0.0418	741	0.972	0.958	17188	0.999
PKP1	-6.65	8	-1.73	0.0418	742	0.972	0.958	17187	0.999
TMEM206	-5.74	6	-1.73	0.0421	743	0.972	0.958	17186	0.999
SH3BGRL3	-5.74	6	-1.73	0.0422	744	0.972	0.958	17185	0.999
COMMD2	-6.62	8	-1.72	0.0423	745	0.972	0.958	17184	0.999
KIAA1683	-6.62	8	-1.72	0.0424	746	0.972	0.958	17183	0.999
NUP43	-6.62	8	-1.72	0.0425	747	0.972	0.957	17182	0.999
CBLN3	-6.62	8	-1.72	0.0425	748	0.972	0.957	17181	0.999
EPHA10	-6.62	8	-1.72	0.0426	749	0.972	0.957	17180	0.999
BDKRB1	-6.61	8	-1.72	0.0427	750	0.972	0.957	17179	0.999
FBXO3	-6.61	8	-1.72	0.0427	751	0.972	0.957	17178	0.999
C6orf222	-6.61	8	-1.72	0.0428	752	0.972	0.957	17177	0.999
TAF5	-6.6	8	-1.72	0.0429	753	0.972	0.957	17176	0.999
DIO3	-6.6	8	-1.72	0.0429	754	0.972	0.957	17175	0.999
PTGIS	-6.6	8	-1.72	0.043	755	0.972	0.957	17174	0.999
TMED2	-6.59	8	-1.71	0.0432	756	0.972	0.957	17173	0.999
NKAIN1	-6.59	8	-1.71	0.0433	757	0.972	0.957	17172	0.999
DNAH8	-6.58	8	-1.71	0.0434	758	0.972	0.957	17171	0.999
SUPV3L1	-6.58	8	-1.71	0.0434	759	0.972	0.957	17170	0.999
LARS	-6.58	8	-1.71	0.0435	760	0.972	0.957	17169	0.999
RAB13	-6.57	8	-1.71	0.0436	761	0.972	0.956	17168	0.999
TRNP1	-6.57	8	-1.71	0.0437	762	0.972	0.956	17167	0.999
SRSF4	-6.56	8	-1.71	0.0438	763	0.972	0.956	17166	0.999
CTSG	-6.56	8	-1.71	0.0439	764	0.972	0.956	17165	0.999
PXN	-5.68	6	-1.71	0.044	765	0.972	0.956	17164	0.999
KRI1	-6.55	8	-1.7	0.0441	766	0.972	0.956	17163	0.998
USE1	-6.55	8	-1.7	0.0442	767	0.972	0.956	17162	0.998
DUSP4	-6.54	8	-1.7	0.0443	768	0.972	0.956	17161	0.998
PIP4K2A	-6.54	8	-1.7	0.0443	769	0.972	0.956	17160	0.998
MRPS21	-6.54	8	-1.7	0.0443	770	0.972	0.956	17159	0.998
SIRT1	-6.54	8	-1.7	0.0445	771	0.972	0.956	17158	0.998
PSMB7	-6.54	8	-1.7	0.0445	772	0.972	0.956	17157	0.998
EIF5	-6.53	8	-1.7	0.0448	773	0.972	0.955	17156	0.998
IPO13	-6.52	8	-1.7	0.0449	774	0.972	0.955	17155	0.998
TFDP2	-6.52	8	-1.7	0.045	775	0.972	0.955	17154	0.998
AKAP5	-6.51	8	-1.69	0.0451	776	0.972	0.955	17153	0.998
MRPS14	-6.51	8	-1.69	0.0451	777	0.972	0.955	17152	0.998
SLC52A3	-6.51	8	-1.69	0.0452	778	0.972	0.955	17151	0.998
FOXF2	-6.51	8	-1.69	0.0453	779	0.972	0.955	17150	0.998
USP11	-6.51	8	-1.69	0.0453	780	0.972	0.955	17149	0.998
RNF5	-6.5	8	-1.69	0.0453	781	0.972	0.955	17148	0.998
KAZALD1	-6.5	8	-1.69	0.0454	782	0.972	0.955	17147	0.998
MED9	-6.49	8	-1.69	0.0456	783	0.972	0.954	17146	0.998
ZNF580	-6.49	8	-1.69	0.0456	784	0.972	0.954	17145	0.998
CSNK2B	-6.49	8	-1.69	0.0457	785	0.972	0.954	17144	0.998
MRPS18B	-6.49	8	-1.69	0.0458	786	0.972	0.954	17143	0.998
ATXN7L2	-6.49	8	-1.69	0.0458	787	0.972	0.954	17142	0.998
COLGALT2	-6.48	8	-1.69	0.0459	788	0.972	0.954	17141	0.998
CHSY1	-6.48	8	-1.69	0.0459	789	0.972	0.954	17140	0.998
ITIH5	-6.48	8	-1.69	0.0459	790	0.972	0.954	17139	0.998
UBAP2L	-6.48	8	-1.68	0.0461	791	0.972	0.954	17138	0.998
EPHA8	-6.48	8	-1.68	0.0461	792	0.972	0.954	17137	0.998
CHTF8	-6.47	8	-1.68	0.0462	793	0.972	0.954	17136	0.998
PSMD7	-6.47	8	-1.68	0.0463	794	0.972	0.954	17135	0.998
NDUFS3	-6.47	8	-1.68	0.0463	795	0.972	0.954	17134	0.998
CDK18	-6.46	8	-1.68	0.0465	796	0.972	0.954	17133	0.998
OLIG1	-6.46	8	-1.68	0.0465	797	0.972	0.954	17132	0.998
VCPKMT	-6.45	8	-1.68	0.0467	798	0.972	0.953	17131	0.998
PVALB	-6.45	8	-1.68	0.0467	799	0.972	0.953	17130	0.998
B3GNT3	-6.45	8	-1.68	0.0468	800	0.972	0.953	17129	0.998
EIF4EBP2	-6.45	8	-1.68	0.0468	801	0.972	0.953	17128	0.998
HAGHL	-6.45	8	-1.68	0.0468	802	0.972	0.953	17127	0.998
NTPCR	-6.44	8	-1.68	0.047	803	0.972	0.953	17126	0.998
GOSR2	-6.44	8	-1.67	0.047	804	0.972	0.953	17125	0.998
ISL2	-6.44	8	-1.67	0.0471	805	0.972	0.953	17124	0.998
DBR1	-6.43	8	-1.67	0.0472	806	0.972	0.953	17123	0.998
ZBTB48	-6.43	8	-1.67	0.0472	807	0.972	0.953	17122	0.998
DNAJC8	-6.43	8	-1.67	0.0472	808	0.972	0.953	17121	0.998
WDR25	-6.43	8	-1.67	0.0473	809	0.972	0.953	17120	0.998
GGT6	-6.43	8	-1.67	0.0474	810	0.972	0.953	17119	0.998
NAPA	-6.42	8	-1.67	0.0475	811	0.972	0.953	17118	0.998
C20orf27	-6.42	8	-1.67	0.0476	812	0.972	0.952	17117	0.998
CNPY2	-6.42	8	-1.67	0.0477	813	0.972	0.952	17116	0.998
RTFDC1	-6.42	8	-1.67	0.0477	814	0.972	0.952	17115	0.998
POLA2	-6.41	8	-1.67	0.0477	815	0.972	0.952	17114	0.998
ZDHHC14	-6.41	8	-1.67	0.0477	816	0.972	0.952	17113	0.998
RHOBTB1	-6.41	8	-1.67	0.0478	817	0.972	0.952	17112	0.998
AGER	-6.4	8	-1.66	0.0481	818	0.972	0.952	17111	0.997
TMEM38A	-6.4	8	-1.66	0.0482	819	0.972	0.952	17110	0.997
CD53	-6.39	8	-1.66	0.0484	820	0.972	0.952	17109	0.997
WWTR1	-6.39	8	-1.66	0.0484	821	0.972	0.952	17108	0.997
ECI1	-6.39	8	-1.66	0.0485	822	0.972	0.952	17107	0.997
C12orf52	-6.39	8	-1.66	0.0485	823	0.972	0.952	17106	0.997
AP1G2	-6.38	8	-1.66	0.0486	824	0.972	0.951	17105	0.997
ACTR3	-6.38	8	-1.66	0.0486	825	0.972	0.951	17104	0.997
CNR1	-6.38	8	-1.66	0.0486	826	0.972	0.951	17103	0.997
HIGD1B	-6.37	8	-1.66	0.0488	827	0.972	0.951	17102	0.997
FXR1	-6.37	8	-1.66	0.0489	828	0.972	0.951	17101	0.997
MRPS22	-6.37	8	-1.65	0.049	829	0.972	0.951	17100	0.997
DDX54	-6.37	8	-1.65	0.049	830	0.972	0.951	17099	0.997
CNTN3	-6.36	8	-1.65	0.0491	831	0.972	0.951	17098	0.997
PHF1	-6.36	8	-1.65	0.0491	832	0.972	0.951	17097	0.997
MYH14	-6.36	8	-1.65	0.0492	833	0.972	0.951	17096	0.997
EXT2	-6.36	8	-1.65	0.0493	834	0.972	0.951	17095	0.997
PPP1R13B	-6.35	8	-1.65	0.0495	835	0.972	0.95	17094	0.997
APEH	-6.35	8	-1.65	0.0495	836	0.972	0.95	17093	0.997
JUND	-6.34	8	-1.65	0.0496	837	0.972	0.95	17092	0.997
SLC41A1	-6.33	8	-1.65	0.05	838	0.972	0.95	17091	0.997
URM1	-6.33	8	-1.64	0.05	839	0.972	0.95	17090	0.997
MYOF	-6.33	8	-1.64	0.05	840	0.972	0.95	17089	0.997
FMN2	-6.33	8	-1.64	0.0501	841	0.972	0.95	17088	0.997
SLC6A17	-6.32	8	-1.64	0.0503	842	0.972	0.95	17087	0.996
KLF7	-6.32	8	-1.64	0.0503	843	0.972	0.95	17086	0.996
TMPRSS9	-6.32	8	-1.64	0.0503	844	0.972	0.95	17085	0.996
WNT9A	-6.32	8	-1.64	0.0504	845	0.972	0.95	17084	0.996
TRIM46	-6.31	8	-1.64	0.0505	846	0.972	0.949	17083	0.996
C2	-6.31	8	-1.64	0.0506	847	0.972	0.949	17082	0.996
TRIM26	-6.31	8	-1.64	0.0507	848	0.972	0.949	17081	0.996
LGI3	-5.45	6	-1.64	0.0509	849	0.972	0.949	17080	0.996
MTHFS	-6.3	8	-1.64	0.051	850	0.972	0.949	17079	0.996
MTOR	-6.29	8	-1.63	0.0511	851	0.972	0.949	17078	0.996
LRRC71	-6.29	8	-1.63	0.0511	852	0.972	0.949	17077	0.996
SMG5	-6.29	8	-1.63	0.0512	853	0.972	0.949	17076	0.996
RHOF	-6.29	8	-1.63	0.0512	854	0.972	0.949	17075	0.996
C10orf88	-6.29	8	-1.63	0.0512	855	0.972	0.949	17074	0.996
STARD7	-6.28	8	-1.63	0.0513	856	0.972	0.949	17073	0.996
LTF	-6.28	8	-1.63	0.0514	857	0.972	0.949	17072	0.996
FUT1	-6.28	8	-1.63	0.0515	858	0.972	0.949	17071	0.996
EME2	-6.28	8	-1.63	0.0515	859	0.972	0.949	17070	0.996
NR1H3	-6.28	8	-1.63	0.0515	860	0.972	0.949	17069	0.996
NCDN	-6.28	8	-1.63	0.0515	861	0.972	0.948	17068	0.996
MAP2K1	-6.27	8	-1.63	0.0516	862	0.972	0.948	17067	0.996
MRPL34	-6.27	8	-1.63	0.0516	863	0.972	0.948	17066	0.996
PAPLN	-6.27	8	-1.63	0.0517	864	0.972	0.948	17065	0.996
APLN	-6.27	8	-1.63	0.0518	865	0.972	0.948	17064	0.996
FMNL3	-6.27	8	-1.63	0.0518	866	0.972	0.948	17063	0.996
CCR3	-6.27	8	-1.63	0.0518	867	0.972	0.948	17062	0.996
TRRAP	-6.26	8	-1.63	0.0519	868	0.972	0.948	17061	0.996
CPSF1	-6.26	8	-1.63	0.0519	869	0.972	0.948	17060	0.996
MCM3AP	-6.26	8	-1.63	0.052	870	0.972	0.948	17059	0.996
COX15	-6.26	8	-1.62	0.0521	871	0.972	0.948	17058	0.996
CREB3L3	-6.25	8	-1.62	0.0522	872	0.972	0.948	17057	0.996
MECR	-6.25	8	-1.62	0.0524	873	0.972	0.948	17056	0.996
KRT2	-6.25	8	-1.62	0.0524	874	0.972	0.948	17055	0.996
DNAAF2	-6.24	8	-1.62	0.0526	875	0.972	0.947	17054	0.996
TNNI1	-6.24	8	-1.62	0.0526	876	0.972	0.947	17053	0.996
KIAA1429	-6.24	8	-1.62	0.0526	877	0.972	0.947	17052	0.996
MEX3A	-6.24	8	-1.62	0.0526	878	0.972	0.947	17051	0.996
VTI1B	-6.24	8	-1.62	0.0527	879	0.972	0.947	17050	0.996
TEX10	-6.23	8	-1.62	0.0527	880	0.972	0.947	17049	0.996
ZNF333	-6.23	8	-1.62	0.0528	881	0.972	0.947	17048	0.996
ROBO2	-6.23	8	-1.62	0.0529	882	0.972	0.947	17047	0.996
PRSS46	-6.22	8	-1.62	0.053	883	0.972	0.947	17046	0.996
PSMD8	-6.22	8	-1.62	0.0531	884	0.972	0.947	17045	0.996
ZNF579	-6.22	8	-1.61	0.0532	885	0.972	0.947	17044	0.996
ARNTL2	-6.22	8	-1.61	0.0532	886	0.972	0.947	17043	0.996
MRPL18	-6.21	8	-1.61	0.0534	887	0.972	0.947	17042	0.996
HSPB2	-6.21	8	-1.61	0.0534	888	0.972	0.947	17041	0.996
CHST8	-6.21	8	-1.61	0.0535	889	0.972	0.946	17040	0.996
CXXC4	-6.21	8	-1.61	0.0536	890	0.972	0.946	17039	0.996
SSC5D	-6.21	8	-1.61	0.0536	891	0.972	0.946	17038	0.996
BHLHA15	-6.21	8	-1.61	0.0536	892	0.972	0.946	17037	0.996
ZBTB45	-6.2	8	-1.61	0.0537	893	0.972	0.946	17036	0.996
PDF	-6.2	8	-1.61	0.0537	894	0.972	0.946	17035	0.996
AP1M1	-6.19	8	-1.61	0.0539	895	0.972	0.946	17034	0.996
NCCRP1	-5.36	6	-1.61	0.054	896	0.972	0.946	17033	0.996
MRPL21	-6.19	8	-1.61	0.0541	897	0.972	0.946	17032	0.996
PFDN6	-6.18	8	-1.6	0.0543	898	0.972	0.946	17031	0.996
MMP14	-6.18	8	-1.6	0.0543	899	0.972	0.946	17030	0.996
LCN15	-6.18	8	-1.6	0.0544	900	0.972	0.946	17029	0.996
ANXA9	-6.17	8	-1.6	0.0545	901	0.972	0.946	17028	0.995
CD2	-6.16	8	-1.6	0.0549	902	0.972	0.945	17027	0.995
MAT2A	-6.16	8	-1.6	0.0549	903	0.972	0.945	17026	0.995
CTRB2	-6.16	8	-1.6	0.055	904	0.972	0.945	17025	0.995
TTC18	-6.15	8	-1.6	0.0552	905	0.972	0.945	17024	0.995
VSIG10	-6.15	8	-1.6	0.0552	906	0.972	0.945	17023	0.995
DPF3	-6.15	8	-1.6	0.0552	907	0.972	0.945	17022	0.995
CAPN11	-5.74	7	-1.59	0.0555	908	0.972	0.945	17021	0.995
EFHD1	-6.14	8	-1.59	0.0556	909	0.972	0.944	17020	0.995
SLIT1	-6.14	8	-1.59	0.0556	910	0.972	0.944	17019	0.995
GMPR2	-6.13	8	-1.59	0.0557	911	0.972	0.944	17018	0.995
DLGAP4	-6.13	8	-1.59	0.0557	912	0.972	0.944	17017	0.995
ARFIP2	-6.13	8	-1.59	0.0559	913	0.972	0.944	17016	0.995
MSMB	-6.12	8	-1.59	0.0561	914	0.972	0.944	17015	0.995
TRAF3IP1	-6.12	8	-1.59	0.0561	915	0.972	0.944	17014	0.995
TAF4	-6.12	8	-1.59	0.0562	916	0.972	0.944	17013	0.995
LOR	-6.12	8	-1.59	0.0562	917	0.972	0.944	17012	0.995
AIMP2	-6.12	8	-1.59	0.0562	918	0.972	0.944	17011	0.995
BBS1	-6.11	8	-1.59	0.0563	919	0.972	0.944	17010	0.995
SLC35B1	-6.11	8	-1.59	0.0564	920	0.972	0.944	17009	0.995
LAX1	-6.1	8	-1.58	0.0568	921	0.972	0.943	17008	0.994
SYMPK	-6.1	8	-1.58	0.0568	922	0.972	0.943	17007	0.994
GALNT2	-6.09	8	-1.58	0.057	923	0.972	0.943	17006	0.994
OSCAR	-6.09	8	-1.58	0.057	924	0.972	0.943	17005	0.994
ZZZ3	-6.09	8	-1.58	0.0571	925	0.972	0.943	17004	0.994
SMNDC1	-6.09	8	-1.58	0.0571	926	0.972	0.943	17003	0.994
RHPN2	-6.09	8	-1.58	0.0572	927	0.972	0.943	17002	0.994
CAMSAP3	-6.09	8	-1.58	0.0572	928	0.972	0.943	17001	0.994
ZBTB7A	-6.08	8	-1.58	0.0572	929	0.972	0.943	17000	0.994
LMBR1L	-6.08	8	-1.58	0.0573	930	0.972	0.943	16999	0.994
GATA2	-6.08	8	-1.58	0.0573	931	0.972	0.943	16998	0.994
KCNJ4	-6.08	8	-1.58	0.0573	932	0.972	0.943	16997	0.994
RPL7A	-6.08	8	-1.58	0.0574	933	0.972	0.943	16996	0.994
C1orf147	-6.08	8	-1.58	0.0574	934	0.972	0.943	16995	0.994
DNAJC24	-6.08	8	-1.58	0.0574	935	0.972	0.943	16994	0.994
TBCE	-6.08	8	-1.58	0.0575	936	0.972	0.943	16993	0.994
INO80	-6.06	8	-1.57	0.0579	937	0.972	0.942	16992	0.994
NASP	-6.06	8	-1.57	0.0579	938	0.972	0.942	16991	0.994
SOX3	-6.05	8	-1.57	0.0582	939	0.972	0.942	16990	0.994
MRI1	-6.05	8	-1.57	0.0583	940	0.972	0.942	16989	0.994
RNGTT	-6.05	8	-1.57	0.0584	941	0.972	0.942	16988	0.994
LELP1	-6.05	8	-1.57	0.0584	942	0.972	0.942	16987	0.994
ATRNL1	-6.04	8	-1.57	0.0585	943	0.972	0.942	16986	0.994
MRPL3	-6.04	8	-1.57	0.0587	944	0.972	0.941	16985	0.994
KLHL11	-6.03	8	-1.57	0.0588	945	0.972	0.941	16984	0.994
WARS	-6.03	8	-1.56	0.0588	946	0.972	0.941	16983	0.994
VPS35	-6.03	8	-1.56	0.0588	947	0.972	0.941	16982	0.994
CCDC87	-6.03	8	-1.56	0.059	948	0.972	0.941	16981	0.994
CPT1C	-6.03	8	-1.56	0.059	949	0.972	0.941	16980	0.994
OSBP	-6.03	8	-1.56	0.0591	950	0.972	0.941	16979	0.994
GLT1D1	-6.02	8	-1.56	0.0591	951	0.972	0.941	16978	0.994
FAM210B	-6.02	8	-1.56	0.0591	952	0.972	0.941	16977	0.994
COX5A	-6.02	8	-1.56	0.0591	953	0.972	0.941	16976	0.994
FOXA3	-6.02	8	-1.56	0.0591	954	0.972	0.941	16975	0.994
MRPL13	-6.02	8	-1.56	0.0592	955	0.972	0.941	16974	0.994
RNLS	-6.02	8	-1.56	0.0592	956	0.972	0.941	16973	0.994
ALPK3	-6.02	8	-1.56	0.0593	957	0.972	0.941	16972	0.994
LY6K	-6.02	8	-1.56	0.0593	958	0.972	0.941	16971	0.994
BAI2	-6.02	8	-1.56	0.0593	959	0.972	0.941	16970	0.994
C12orf57	-6.02	8	-1.56	0.0594	960	0.972	0.941	16969	0.994
NAF1	-6.02	8	-1.56	0.0594	961	0.972	0.941	16968	0.994
SLC16A8	-6.01	8	-1.56	0.0594	962	0.972	0.941	16967	0.994
HOXB7	-6.01	8	-1.56	0.0597	963	0.972	0.94	16966	0.994
FAM179B	-6.01	8	-1.56	0.0597	964	0.972	0.94	16965	0.994
NOTCH3	-6.01	8	-1.56	0.0597	965	0.972	0.94	16964	0.994
GOLGA3	-6	8	-1.56	0.0598	966	0.972	0.94	16963	0.994
TBP	-6	8	-1.56	0.0599	967	0.972	0.94	16962	0.994
SLAMF8	-5.99	8	-1.55	0.0601	968	0.972	0.94	16961	0.993
TPI1	-5.99	8	-1.55	0.0601	969	0.972	0.94	16960	0.993
OGT	-5.98	8	-1.55	0.0604	970	0.972	0.94	16959	0.993
C3	-5.98	8	-1.55	0.0604	971	0.972	0.94	16958	0.993
ERCC3	-5.98	8	-1.55	0.0605	972	0.972	0.939	16957	0.993
RELA	-5.98	8	-1.55	0.0606	973	0.972	0.939	16956	0.993
SFRP5	-5.97	8	-1.55	0.0607	974	0.972	0.939	16955	0.993
DAP3	-5.97	8	-1.55	0.0607	975	0.972	0.939	16954	0.993
WDR1	-5.97	8	-1.55	0.0608	976	0.972	0.939	16953	0.993
LAGE3	-5.97	8	-1.55	0.0608	977	0.972	0.939	16952	0.993
CLDN9	-5.97	8	-1.55	0.061	978	0.972	0.939	16951	0.993
VDAC2	-5.96	8	-1.55	0.0612	979	0.972	0.939	16950	0.993
MRPL39	-5.96	8	-1.55	0.0612	980	0.972	0.939	16949	0.993
KLF2	-5.96	8	-1.54	0.0612	981	0.972	0.939	16948	0.993
RAC1	-5.96	8	-1.54	0.0613	982	0.972	0.939	16947	0.993
PRKCSH	-5.96	8	-1.54	0.0614	983	0.972	0.939	16946	0.993
C6orf141	-5.95	8	-1.54	0.0614	984	0.972	0.939	16945	0.993
LTBP2	-5.95	8	-1.54	0.0615	985	0.972	0.938	16944	0.993
CDK2AP1	-5.95	8	-1.54	0.0615	986	0.972	0.938	16943	0.993
IP6K3	-5.95	8	-1.54	0.0616	987	0.972	0.938	16942	0.993
BRK1	-5.94	8	-1.54	0.0617	988	0.972	0.938	16941	0.993
SPEN	-5.94	8	-1.54	0.0619	989	0.972	0.938	16940	0.993
CIAPIN1	-5.94	8	-1.54	0.0619	990	0.972	0.938	16939	0.993
TNNC2	-5.94	8	-1.54	0.062	991	0.972	0.938	16938	0.993
ACTR5	-5.94	8	-1.54	0.062	992	0.972	0.938	16937	0.993
CYP26B1	-5.93	8	-1.54	0.062	993	0.972	0.938	16936	0.993
FAM168B	-5.93	8	-1.54	0.0621	994	0.972	0.938	16935	0.993
TCAP	-5.93	8	-1.54	0.0623	995	0.972	0.938	16934	0.993
HRK	-5.92	8	-1.54	0.0624	996	0.972	0.938	16933	0.993
DCAF6	-5.92	8	-1.53	0.0624	997	0.972	0.938	16932	0.993
PSG5	-2.96	2	-1.53	0.0624	998	0.972	0.938	16931	0.993
RNF7	-5.92	8	-1.53	0.0625	999	0.972	0.937	16930	0.993
AMOTL2	-5.91	8	-1.53	0.0627	1000	0.972	0.937	16929	0.993
UBL4B	-5.91	8	-1.53	0.0627	1001	0.972	0.937	16928	0.993
NOVA2	-5.91	8	-1.53	0.0627	1002	0.972	0.937	16927	0.993
KCNH2	-5.91	8	-1.53	0.0627	1003	0.972	0.937	16926	0.993
SPTSSA	-5.91	8	-1.53	0.0627	1004	0.972	0.937	16925	0.993
PSTK	-5.91	8	-1.53	0.0628	1005	0.972	0.937	16924	0.993
PDCD2L	-5.91	8	-1.53	0.0628	1006	0.972	0.937	16923	0.993
MESP1	-5.91	8	-1.53	0.063	1007	0.972	0.937	16922	0.993
PLAC9	-5.9	8	-1.53	0.063	1008	0.972	0.937	16921	0.993
IL4I1	-5.9	8	-1.53	0.063	1009	0.972	0.937	16920	0.993
METTL21C	-5.9	8	-1.53	0.0631	1010	0.972	0.937	16919	0.993
TNFSF13B	-5.9	8	-1.53	0.0632	1011	0.972	0.937	16918	0.993
ARHGAP31	-5.9	8	-1.53	0.0632	1012	0.972	0.937	16917	0.993
ERO1LB	-5.9	8	-1.53	0.0633	1013	0.972	0.937	16916	0.993
COX6A1P2	-5.9	8	-1.53	0.0633	1014	0.972	0.937	16915	0.993
C16orf52	-5.89	8	-1.53	0.0634	1015	0.972	0.937	16914	0.993
TFAM	-5.89	8	-1.53	0.0634	1016	0.972	0.937	16913	0.993
ONECUT3	-5.89	8	-1.53	0.0635	1017	0.972	0.936	16912	0.993
GLYCTK	-5.89	8	-1.53	0.0635	1018	0.972	0.936	16911	0.993
RTCB	-5.89	8	-1.53	0.0636	1019	0.972	0.936	16910	0.993
PDZD11	-5.89	8	-1.53	0.0636	1020	0.972	0.936	16909	0.993
ALKBH2	-5.88	8	-1.52	0.0638	1021	0.972	0.936	16908	0.993
BMP1	-5.88	8	-1.52	0.0639	1022	0.972	0.936	16907	0.993
ARPC5	-5.88	8	-1.52	0.064	1023	0.972	0.936	16906	0.993
PAQR8	-5.88	8	-1.52	0.064	1024	0.972	0.936	16905	0.993
ZNF852	-5.88	8	-1.52	0.064	1025	0.972	0.936	16904	0.993
TMEM207	-5.87	8	-1.52	0.0641	1026	0.972	0.936	16903	0.993
GRIN3B	-5.87	8	-1.52	0.0641	1027	0.972	0.936	16902	0.993
DACH2	-5.87	8	-1.52	0.0641	1028	0.972	0.936	16901	0.993
PMVK	-5.87	8	-1.52	0.0642	1029	0.972	0.936	16900	0.993
PNMAL2	-5.86	8	-1.52	0.0644	1030	0.972	0.936	16899	0.993
DENND4C	-5.86	8	-1.52	0.0645	1031	0.972	0.935	16898	0.992
EGR2	-5.86	8	-1.52	0.0646	1032	0.972	0.935	16897	0.992
FLNC	-5.86	8	-1.52	0.0646	1033	0.972	0.935	16896	0.992
EPOR	-5.85	8	-1.52	0.0647	1034	0.972	0.935	16895	0.992
ITGB5	-5.85	8	-1.52	0.0648	1035	0.972	0.935	16894	0.992
ZNF34	-5.85	8	-1.51	0.0649	1036	0.972	0.935	16893	0.992
GPR162	-5.85	8	-1.51	0.0649	1037	0.972	0.935	16892	0.992
CDC42	-5.06	6	-1.51	0.065	1038	0.972	0.935	16891	0.992
GPR83	-5.85	8	-1.51	0.065	1039	0.972	0.935	16890	0.992
MRPL35	-5.84	8	-1.51	0.0652	1040	0.972	0.935	16889	0.992
TMCO4	-5.84	8	-1.51	0.0654	1041	0.972	0.935	16888	0.992
OSGEP	-5.83	8	-1.51	0.0654	1042	0.972	0.935	16887	0.992
SUGT1	-5.83	8	-1.51	0.0655	1043	0.972	0.935	16886	0.992
SGTA	-5.83	8	-1.51	0.0655	1044	0.972	0.935	16885	0.992
IBA57	-5.83	8	-1.51	0.0655	1045	0.972	0.934	16884	0.992
C10orf2	-5.83	8	-1.51	0.0656	1046	0.972	0.934	16883	0.992
CCDC106	-5.82	8	-1.51	0.0657	1047	0.972	0.934	16882	0.992
DSCR3	-5.82	8	-1.51	0.0658	1048	0.972	0.934	16881	0.992
TELO2	-5.82	8	-1.51	0.066	1049	0.972	0.934	16880	0.992
NRXN2	-5.82	8	-1.51	0.0661	1050	0.972	0.934	16879	0.992
TLN1	-5.81	8	-1.5	0.0662	1051	0.972	0.934	16878	0.992
MAGI1	-5.81	8	-1.5	0.0662	1052	0.972	0.934	16877	0.992
GCM1	-5.81	8	-1.5	0.0662	1053	0.972	0.934	16876	0.992
SERHL2	-5.81	8	-1.5	0.0662	1054	0.972	0.934	16875	0.992
MRPS16	-5.81	8	-1.5	0.0664	1055	0.972	0.934	16874	0.992
ORM1	-5.03	6	-1.5	0.0664	1056	0.972	0.934	16873	0.992
SYNE1	-5.8	8	-1.5	0.0665	1057	0.972	0.934	16872	0.992
IRF3	-5.8	8	-1.5	0.0666	1058	0.972	0.933	16871	0.992
GUCA1A	-5.8	8	-1.5	0.0667	1059	0.972	0.933	16870	0.992
WDR75	-5.79	8	-1.5	0.0668	1060	0.972	0.933	16869	0.992
TMEM151B	-5.79	8	-1.5	0.0669	1061	0.972	0.933	16868	0.992
DHODH	-5.79	8	-1.5	0.0669	1062	0.972	0.933	16867	0.992
KCTD7	-5.79	8	-1.5	0.0669	1063	0.972	0.933	16866	0.992
KLC1	-5.79	8	-1.5	0.067	1064	0.972	0.933	16865	0.992
GPR108	-5.79	8	-1.5	0.067	1065	0.972	0.933	16864	0.992
NKAIN4	-5.79	8	-1.5	0.0671	1066	0.972	0.933	16863	0.992
PGLYRP3	-5.78	8	-1.5	0.0672	1067	0.972	0.933	16862	0.992
THBD	-5.78	8	-1.5	0.0673	1068	0.972	0.933	16861	0.992
NME9	-5.78	8	-1.49	0.0675	1069	0.972	0.933	16860	0.992
ZNF556	-5.77	8	-1.49	0.0675	1070	0.972	0.932	16859	0.992
HPD	-5.77	8	-1.49	0.0676	1071	0.972	0.932	16858	0.992
TAF6L	-5.77	8	-1.49	0.0678	1072	0.972	0.932	16857	0.991
CFB	-5.76	8	-1.49	0.0678	1073	0.972	0.932	16856	0.991
EPHX1	-5.76	8	-1.49	0.0679	1074	0.972	0.932	16855	0.991
NCSTN	-5.76	8	-1.49	0.068	1075	0.972	0.932	16854	0.991
XPOT	-5.76	8	-1.49	0.0681	1076	0.972	0.932	16853	0.991
C1orf87	-5.76	8	-1.49	0.0681	1077	0.972	0.932	16852	0.991
RPL10	-4.98	6	-1.49	0.0683	1078	0.972	0.932	16851	0.991
RPL34	-2.88	2	-1.49	0.0683	1079	0.972	0.932	16850	0.991
SGMS1	-5.75	8	-1.49	0.0683	1080	0.972	0.932	16849	0.991
UBA5	-5.75	8	-1.49	0.0683	1081	0.972	0.932	16848	0.991
FCF1	-4.07	4	-1.49	0.0683	1082	0.972	0.932	16847	0.991
PSMD9	-5.75	8	-1.49	0.0685	1083	0.972	0.932	16846	0.991
NDUFV1	-5.74	8	-1.49	0.0685	1084	0.972	0.931	16845	0.991
UNC5B	-5.74	8	-1.48	0.0689	1085	0.972	0.931	16844	0.991
GDPGP1	-5.73	8	-1.48	0.0692	1086	0.972	0.931	16843	0.991
COPA	-5.72	8	-1.48	0.0693	1087	0.972	0.931	16842	0.991
KCNH6	-5.72	8	-1.48	0.0693	1088	0.972	0.931	16841	0.991
PFDN2	-5.72	8	-1.48	0.0694	1089	0.972	0.931	16840	0.991
CHI3L1	-5.72	8	-1.48	0.0694	1090	0.972	0.931	16839	0.991
FGF22	-5.72	8	-1.48	0.0695	1091	0.972	0.931	16838	0.991
C3orf35	-5.72	8	-1.48	0.0695	1092	0.972	0.93	16837	0.991
TCL1B	-5.71	8	-1.48	0.0697	1093	0.972	0.93	16836	0.991
VGF	-5.71	8	-1.48	0.07	1094	0.972	0.93	16835	0.99
DZANK1	-5.7	8	-1.47	0.0701	1095	0.972	0.93	16834	0.99
RPL37A	-4.03	4	-1.47	0.0701	1096	0.972	0.93	16833	0.99
CDC25A	-5.7	8	-1.47	0.0703	1097	0.972	0.93	16832	0.99
AGT	-5.7	8	-1.47	0.0703	1098	0.972	0.93	16831	0.99
TNFRSF4	-5.7	8	-1.47	0.0703	1099	0.972	0.93	16830	0.99
GTF3C1	-5.7	8	-1.47	0.0703	1100	0.972	0.93	16829	0.99
AP1S2	-5.69	8	-1.47	0.0705	1101	0.972	0.93	16828	0.99
GPM6B	-5.69	8	-1.47	0.0706	1102	0.972	0.929	16827	0.99
PLCD1	-5.68	8	-1.47	0.0708	1103	0.972	0.929	16826	0.99
SNAI1	-5.68	8	-1.47	0.0708	1104	0.972	0.929	16825	0.99
PTGER1	-5.68	8	-1.47	0.0708	1105	0.972	0.929	16824	0.99
HOXD1	-5.68	8	-1.47	0.0709	1106	0.972	0.929	16823	0.99
LMO2	-5.68	8	-1.47	0.071	1107	0.972	0.929	16822	0.99
COPS6	-5.68	8	-1.47	0.0711	1108	0.972	0.929	16821	0.99
DARS	-5.68	8	-1.47	0.0711	1109	0.972	0.929	16820	0.99
NMNAT1	-5.67	8	-1.47	0.0711	1110	0.972	0.929	16819	0.99
DDX27	-5.67	8	-1.47	0.0713	1111	0.972	0.929	16818	0.99
UXT	-5.67	8	-1.47	0.0714	1112	0.972	0.929	16817	0.99
MTMR14	-5.66	8	-1.47	0.0714	1113	0.972	0.929	16816	0.99
BCAR1	-5.66	8	-1.46	0.0716	1114	0.972	0.928	16815	0.99
OR4Q3	-5.66	8	-1.46	0.0716	1115	0.972	0.928	16814	0.99
EGLN2	-5.65	8	-1.46	0.0718	1116	0.972	0.928	16813	0.99
YPEL5	-5.65	8	-1.46	0.0722	1117	0.972	0.928	16812	0.989
CRKL	-5.64	8	-1.46	0.0722	1118	0.972	0.928	16811	0.989
ANKRD1	-5.64	8	-1.46	0.0725	1119	0.972	0.927	16810	0.989
SRP19	-5.63	8	-1.46	0.0726	1120	0.972	0.927	16809	0.989
SPATA17	-5.63	8	-1.46	0.0727	1121	0.972	0.927	16808	0.989
HSD17B1	-5.63	8	-1.46	0.0727	1122	0.972	0.927	16807	0.989
ORAI2	-5.62	8	-1.45	0.073	1123	0.972	0.927	16806	0.989
C1orf35	-5.62	8	-1.45	0.073	1124	0.972	0.927	16805	0.989
ADCK4	-5.62	8	-1.45	0.0731	1125	0.972	0.927	16804	0.989
PLD5	-5.62	8	-1.45	0.0732	1126	0.972	0.927	16803	0.989
CDK8	-5.62	8	-1.45	0.0732	1127	0.972	0.927	16802	0.989
BMP7	-5.62	8	-1.45	0.0732	1128	0.972	0.927	16801	0.989
RIOK1	-5.62	8	-1.45	0.0733	1129	0.972	0.927	16800	0.989
HIST1H1A	-5.61	8	-1.45	0.0734	1130	0.972	0.927	16799	0.989
ADCY5	-5.61	8	-1.45	0.0735	1131	0.972	0.927	16798	0.989
PEBP1	-5.61	8	-1.45	0.0736	1132	0.972	0.926	16797	0.989
MED12	-5.6	8	-1.45	0.0737	1133	0.972	0.926	16796	0.989
ATAD1	-5.6	8	-1.45	0.0738	1134	0.972	0.926	16795	0.989
AMOTL1	-5.6	8	-1.45	0.0739	1135	0.972	0.926	16794	0.989
MARCKSL1	-5.6	8	-1.45	0.0739	1136	0.972	0.926	16793	0.989
MYO1H	-5.6	8	-1.45	0.0739	1137	0.972	0.926	16792	0.989
CCT8	-5.59	8	-1.45	0.0742	1138	0.972	0.926	16791	0.989
KCNV2	-5.59	8	-1.44	0.0742	1139	0.972	0.926	16790	0.988
KIAA1324	-5.59	8	-1.44	0.0743	1140	0.972	0.926	16789	0.988
TMEM25	-5.59	8	-1.44	0.0744	1141	0.972	0.926	16788	0.988
RPA2	-5.59	8	-1.44	0.0744	1142	0.972	0.926	16787	0.988
RPA3	-5.58	8	-1.44	0.0744	1143	0.972	0.926	16786	0.988
ANTXRL	-5.58	8	-1.44	0.0745	1144	0.972	0.926	16785	0.988
SIX6	-5.58	8	-1.44	0.0746	1145	0.972	0.925	16784	0.988
PAN3	-5.58	8	-1.44	0.0748	1146	0.972	0.925	16783	0.988
ITIH1	-5.57	8	-1.44	0.0749	1147	0.972	0.925	16782	0.988
RMND5A	-5.57	8	-1.44	0.075	1148	0.972	0.925	16781	0.988
ILF3	-5.57	8	-1.44	0.075	1149	0.972	0.925	16780	0.988
KIRREL2	-5.56	8	-1.44	0.0752	1150	0.972	0.925	16779	0.988
FAIM2	-5.56	8	-1.44	0.0753	1151	0.972	0.925	16778	0.988
POMP	-5.56	8	-1.44	0.0754	1152	0.972	0.925	16777	0.988
GCH1	-5.56	8	-1.44	0.0754	1153	0.972	0.925	16776	0.988
PLA2G12B	-5.56	8	-1.44	0.0755	1154	0.972	0.924	16775	0.988
BMP5	-5.56	8	-1.44	0.0755	1155	0.972	0.924	16774	0.988
ARHGEF10L	-5.55	8	-1.44	0.0756	1156	0.972	0.924	16773	0.988
MARK4	-5.55	8	-1.43	0.0757	1157	0.972	0.924	16772	0.988
GTF2A2	-5.55	8	-1.43	0.0758	1158	0.972	0.924	16771	0.988
ARHGAP9	-5.55	8	-1.43	0.0759	1159	0.972	0.924	16770	0.988
ZBTB37	-5.55	8	-1.43	0.0759	1160	0.972	0.924	16769	0.988
CTXN1	-5.55	8	-1.43	0.0759	1161	0.972	0.924	16768	0.988
FAM57B	-5.55	8	-1.43	0.0759	1162	0.972	0.924	16767	0.988
RPF1	-5.55	8	-1.43	0.076	1163	0.972	0.924	16766	0.988
LEPR	-5.54	8	-1.43	0.076	1164	0.972	0.924	16765	0.988
SLC39A2	-5.54	8	-1.43	0.076	1165	0.972	0.924	16764	0.988
C1orf27	-5.54	8	-1.43	0.076	1166	0.972	0.924	16763	0.988
WDHD1	-5.54	8	-1.43	0.076	1167	0.972	0.924	16762	0.988
FCRL4	-5.54	8	-1.43	0.0761	1168	0.972	0.924	16761	0.988
ST6GALNAC5	-5.54	8	-1.43	0.0763	1169	0.972	0.924	16760	0.988
LRRC29	-5.54	8	-1.43	0.0763	1170	0.972	0.924	16759	0.988
GPX5	-5.54	8	-1.43	0.0763	1171	0.972	0.924	16758	0.988
WISP2	-5.53	8	-1.43	0.0766	1172	0.972	0.923	16757	0.988
IFT57	-5.53	8	-1.43	0.0766	1173	0.972	0.923	16756	0.988
VASH2	-5.53	8	-1.43	0.0767	1174	0.972	0.923	16755	0.988
OR5K4	-5.53	8	-1.43	0.0767	1175	0.972	0.923	16754	0.988
WHAMM	-5.53	8	-1.43	0.0767	1176	0.972	0.923	16753	0.988
RYR2	-5.52	8	-1.43	0.0768	1177	0.972	0.923	16752	0.988
NTRK1	-5.52	8	-1.43	0.0771	1178	0.972	0.923	16751	0.988
LPIN3	-5.52	8	-1.42	0.0771	1179	0.972	0.923	16750	0.988
GPAT2	-5.51	8	-1.42	0.0772	1180	0.972	0.923	16749	0.988
LIPA	-5.51	8	-1.42	0.0773	1181	0.972	0.923	16748	0.988
C3orf30	-5.51	8	-1.42	0.0773	1182	0.972	0.923	16747	0.988
LRP5L	-5.51	8	-1.42	0.0774	1183	0.972	0.923	16746	0.988
POMT1	-5.5	8	-1.42	0.0775	1184	0.972	0.922	16745	0.988
ABHD6	-5.5	8	-1.42	0.0775	1185	0.972	0.922	16744	0.988
RBM12B	-5.5	8	-1.42	0.0775	1186	0.972	0.922	16743	0.988
NRF1	-5.5	8	-1.42	0.0776	1187	0.972	0.922	16742	0.988
PLXNA2	-5.5	8	-1.42	0.0776	1188	0.972	0.922	16741	0.988
PRKD2	-5.5	8	-1.42	0.0778	1189	0.972	0.922	16740	0.988
AIF1	-5.5	8	-1.42	0.0778	1190	0.972	0.922	16739	0.988
TRIM17	-5.5	8	-1.42	0.0778	1191	0.972	0.922	16738	0.988
NDUFA12	-5.5	8	-1.42	0.0778	1192	0.972	0.922	16737	0.988
LRRC56	-5.5	8	-1.42	0.0779	1193	0.972	0.922	16736	0.988
FAM90A26	-3.88	4	-1.42	0.078	1194	0.972	0.922	16735	0.988
VPS45	-5.49	8	-1.42	0.078	1195	0.972	0.922	16734	0.988
RBBP5	-5.49	8	-1.42	0.078	1196	0.972	0.922	16733	0.988
SHH	-5.48	8	-1.42	0.0783	1197	0.972	0.922	16732	0.988
FAM180A	-5.48	8	-1.42	0.0783	1198	0.972	0.922	16731	0.988
GZMH	-5.48	8	-1.42	0.0784	1199	0.972	0.922	16730	0.988
SLC26A9	-5.48	8	-1.42	0.0784	1200	0.972	0.922	16729	0.988
PIP5K1C	-5.48	8	-1.42	0.0784	1201	0.972	0.922	16728	0.988
DUSP27	-5.47	8	-1.41	0.0788	1202	0.972	0.921	16727	0.987
ECHDC2	-5.47	8	-1.41	0.0789	1203	0.972	0.921	16726	0.987
INF2	-5.47	8	-1.41	0.0789	1204	0.972	0.921	16725	0.987
DEDD2	-5.11	7	-1.41	0.079	1205	0.972	0.921	16724	0.987
PFKP	-5.47	8	-1.41	0.079	1206	0.972	0.921	16723	0.987
SLC25A3	-5.46	8	-1.41	0.0791	1207	0.972	0.921	16722	0.987
NRP2	-5.46	8	-1.41	0.0793	1208	0.972	0.921	16721	0.987
HIST1H4A	-5.46	8	-1.41	0.0794	1209	0.972	0.921	16720	0.987
NACC1	-5.46	8	-1.41	0.0795	1210	0.972	0.921	16719	0.987
CNNM1	-5.45	8	-1.41	0.0796	1211	0.972	0.92	16718	0.987
TAF11	-5.45	8	-1.41	0.0797	1212	0.972	0.92	16717	0.987
GADD45B	-5.45	8	-1.41	0.0797	1213	0.972	0.92	16716	0.987
TRIM33	-5.45	8	-1.41	0.0797	1214	0.972	0.92	16715	0.987
EML5	-5.45	8	-1.41	0.0798	1215	0.972	0.92	16714	0.987
TBC1D12	-5.44	8	-1.41	0.08	1216	0.972	0.92	16713	0.987
LRCH2	-5.44	8	-1.41	0.08	1217	0.972	0.92	16712	0.987
AEN	-5.44	8	-1.41	0.08	1218	0.972	0.92	16711	0.987
ANG	-5.44	8	-1.41	0.08	1219	0.972	0.92	16710	0.987
KCNK9	-5.44	8	-1.4	0.0801	1220	0.972	0.92	16709	0.987
DMPK	-5.44	8	-1.4	0.0802	1221	0.972	0.92	16708	0.987
SLC16A1	-5.43	8	-1.4	0.0803	1222	0.972	0.92	16707	0.987
PSMD12	-5.43	8	-1.4	0.0804	1223	0.972	0.92	16706	0.987
ALG6	-5.43	8	-1.4	0.0805	1224	0.972	0.919	16705	0.987
INPP4A	-5.43	8	-1.4	0.0805	1225	0.972	0.919	16704	0.987
ADHFE1	-5.43	8	-1.4	0.0806	1226	0.972	0.919	16703	0.987
POLE4	-5.43	8	-1.4	0.0806	1227	0.972	0.919	16702	0.987
AGAP1	-5.43	8	-1.4	0.0806	1228	0.972	0.919	16701	0.987
MAP3K6	-5.42	8	-1.4	0.0807	1229	0.972	0.919	16700	0.987
CHST11	-5.42	8	-1.4	0.0808	1230	0.972	0.919	16699	0.987
FAM46C	-5.42	8	-1.4	0.081	1231	0.972	0.919	16698	0.987
SMPD3	-5.42	8	-1.4	0.0811	1232	0.972	0.919	16697	0.987
HYAL3	-5.41	8	-1.4	0.0813	1233	0.972	0.919	16696	0.986
CALML6	-5.41	8	-1.4	0.0814	1234	0.972	0.919	16695	0.986
TCFL5	-5.41	8	-1.39	0.0815	1235	0.972	0.918	16694	0.986
REV3L	-5.4	8	-1.39	0.0817	1236	0.972	0.918	16693	0.986
CPNE6	-5.4	8	-1.39	0.0817	1237	0.972	0.918	16692	0.986
MPZ	-5.4	8	-1.39	0.0818	1238	0.972	0.918	16691	0.986
LPAR2	-5.4	8	-1.39	0.0819	1239	0.972	0.918	16690	0.986
ANXA4	-5.4	8	-1.39	0.0819	1240	0.972	0.918	16689	0.986
TCAIM	-5.39	8	-1.39	0.082	1241	0.972	0.918	16688	0.986
PGLS	-4.67	6	-1.39	0.082	1242	0.972	0.918	16687	0.986
SND1	-5.39	8	-1.39	0.082	1243	0.972	0.918	16686	0.986
TOX4	-5.39	8	-1.39	0.0821	1244	0.972	0.918	16685	0.986
TIMELESS	-5.39	8	-1.39	0.0822	1245	0.972	0.918	16684	0.986
PSMA3	-5.39	8	-1.39	0.0822	1246	0.972	0.918	16683	0.986
ELK1	-5.39	8	-1.39	0.0822	1247	0.972	0.918	16682	0.986
KIF9	-5.39	8	-1.39	0.0823	1248	0.972	0.918	16681	0.986
ARHGAP30	-5.39	8	-1.39	0.0823	1249	0.972	0.918	16680	0.986
TUBB	-5.39	8	-1.39	0.0823	1250	0.972	0.918	16679	0.986
SLC9A9	-5.38	8	-1.39	0.0825	1251	0.972	0.917	16678	0.986
SFXN2	-5.38	8	-1.39	0.0825	1252	0.972	0.917	16677	0.986
BZW1	-5.38	8	-1.39	0.0826	1253	0.972	0.917	16676	0.986
PIAS4	-5.38	8	-1.39	0.0827	1254	0.972	0.917	16675	0.986
SLC22A12	-5.38	8	-1.39	0.0827	1255	0.972	0.917	16674	0.986
ZCCHC12	-5.37	8	-1.39	0.0828	1256	0.972	0.917	16673	0.986
INSRR	-5.37	8	-1.39	0.0828	1257	0.972	0.917	16672	0.986
PBXIP1	-5.37	8	-1.39	0.0828	1258	0.972	0.917	16671	0.986
NR2F2	-5.37	8	-1.39	0.083	1259	0.972	0.917	16670	0.986
CDK2AP2	-5.37	8	-1.38	0.0831	1260	0.972	0.917	16669	0.986
GPANK1	-5.36	8	-1.38	0.0832	1261	0.972	0.917	16668	0.986
CCDC175	-5.36	8	-1.38	0.0834	1262	0.972	0.917	16667	0.986
CD247	-5.36	8	-1.38	0.0834	1263	0.972	0.917	16666	0.986
ZFYVE19	-5.36	8	-1.38	0.0834	1264	0.972	0.917	16665	0.986
SPAG17	-4.64	6	-1.38	0.0835	1265	0.972	0.916	16664	0.986
DISC1	-5.35	8	-1.38	0.0837	1266	0.972	0.916	16663	0.986
TFE3	-5.35	8	-1.38	0.0837	1267	0.972	0.916	16662	0.986
HOXA13	-5.35	8	-1.38	0.0839	1268	0.972	0.916	16661	0.986
KMT2D	-5.35	8	-1.38	0.0839	1269	0.972	0.916	16660	0.986
XRN1	-5.35	8	-1.38	0.084	1270	0.972	0.916	16659	0.986
GBA2	-5.34	8	-1.38	0.084	1271	0.972	0.916	16658	0.986
CNIH3	-5.34	8	-1.38	0.0841	1272	0.972	0.916	16657	0.986
HYAL2	-5.34	8	-1.38	0.0841	1273	0.972	0.916	16656	0.986
PHC3	-5.34	8	-1.38	0.0841	1274	0.972	0.916	16655	0.986
DMRTC2	-5.34	8	-1.38	0.0842	1275	0.972	0.916	16654	0.986
NISCH	-5.34	8	-1.38	0.0843	1276	0.972	0.916	16653	0.986
ZDHHC8	-5.34	8	-1.38	0.0843	1277	0.972	0.916	16652	0.986
DKK1	-5.34	8	-1.38	0.0844	1278	0.972	0.916	16651	0.986
IL12A	-5.34	8	-1.38	0.0844	1279	0.972	0.916	16650	0.986
CACNA1B	-5.33	8	-1.38	0.0845	1280	0.972	0.915	16649	0.986
SEMA4A	-5.33	8	-1.37	0.0846	1281	0.972	0.915	16648	0.986
PTGS2	-5.33	8	-1.37	0.0846	1282	0.972	0.915	16647	0.986
GDF7	-5.33	8	-1.37	0.0847	1283	0.972	0.915	16646	0.986
CHCHD6	-5.33	8	-1.37	0.0848	1284	0.972	0.915	16645	0.986
STX2	-5.33	8	-1.37	0.0848	1285	0.972	0.915	16644	0.986
CPNE5	-5.32	8	-1.37	0.0852	1286	0.972	0.915	16643	0.985
SDC3	-5.31	8	-1.37	0.0853	1287	0.972	0.915	16642	0.985
FAM210A	-5.31	8	-1.37	0.0854	1288	0.972	0.915	16641	0.985
TMSB4X	-2.66	2	-1.37	0.0854	1289	0.972	0.915	16640	0.985
ZBTB8OS	-5.31	8	-1.37	0.0854	1290	0.972	0.915	16639	0.985
C11orf57	-5.31	8	-1.37	0.0855	1291	0.972	0.915	16638	0.985
NCKAP1L	-5.31	8	-1.37	0.0855	1292	0.972	0.914	16637	0.985
BTG1	-5.31	8	-1.37	0.0855	1293	0.972	0.914	16636	0.985
DCLK1	-5.31	8	-1.37	0.0856	1294	0.972	0.914	16635	0.985
DNAH10	-5.31	8	-1.37	0.0856	1295	0.972	0.914	16634	0.985
MYF5	-5.31	8	-1.37	0.0857	1296	0.972	0.914	16633	0.985
TMEM121	-5.3	8	-1.37	0.0858	1297	0.972	0.914	16632	0.985
QTRTD1	-5.3	8	-1.37	0.0859	1298	0.972	0.914	16631	0.985
JMJD1C	-5.3	8	-1.37	0.086	1299	0.972	0.914	16630	0.985
NIPBL	-5.3	8	-1.37	0.086	1300	0.972	0.914	16629	0.985
BARX1	-5.29	8	-1.37	0.0861	1301	0.972	0.914	16628	0.985
PRR22	-5.29	8	-1.37	0.0861	1302	0.972	0.914	16627	0.985
ARMC6	-5.29	8	-1.36	0.0864	1303	0.972	0.914	16626	0.985
TSSC4	-5.28	8	-1.36	0.0866	1304	0.972	0.913	16625	0.985
ZC3HAV1L	-5.28	8	-1.36	0.0867	1305	0.972	0.913	16624	0.985
USHBP1	-5.28	8	-1.36	0.0868	1306	0.972	0.913	16623	0.985
PGF	-5.28	8	-1.36	0.0868	1307	0.972	0.913	16622	0.985
RNPEP	-5.27	8	-1.36	0.087	1308	0.972	0.913	16621	0.985
CCDC19	-5.27	8	-1.36	0.087	1309	0.972	0.913	16620	0.985
PISD	-5.27	8	-1.36	0.0871	1310	0.972	0.913	16619	0.985
FKRP	-5.27	8	-1.36	0.0872	1311	0.972	0.913	16618	0.985
NPM3	-5.27	8	-1.36	0.0873	1312	0.972	0.913	16617	0.985
A1CF	-5.27	8	-1.36	0.0873	1313	0.972	0.913	16616	0.985
RAB3A	-5.27	8	-1.36	0.0873	1314	0.972	0.913	16615	0.985
TMEM145	-5.26	8	-1.36	0.0875	1315	0.972	0.912	16614	0.985
CATSPERG	-5.26	8	-1.36	0.0876	1316	0.972	0.912	16613	0.985
SYT2	-5.26	8	-1.36	0.0876	1317	0.972	0.912	16612	0.985
SIRT3	-5.26	8	-1.36	0.0876	1318	0.972	0.912	16611	0.985
RABGAP1	-5.26	8	-1.36	0.0877	1319	0.972	0.912	16610	0.985
GPR68	-4.55	6	-1.35	0.0877	1320	0.972	0.912	16609	0.985
TULP4	-5.26	8	-1.35	0.0878	1321	0.972	0.912	16608	0.985
HCST	-5.25	8	-1.35	0.088	1322	0.972	0.912	16607	0.985
CLSTN3	-5.25	8	-1.35	0.0882	1323	0.972	0.912	16606	0.984
ZFHX4	-5.24	8	-1.35	0.0882	1324	0.972	0.912	16605	0.984
P4HTM	-5.24	8	-1.35	0.0883	1325	0.972	0.912	16604	0.984
FBXW9	-5.24	8	-1.35	0.0883	1326	0.972	0.912	16603	0.984
EOGT	-5.24	8	-1.35	0.0883	1327	0.972	0.912	16602	0.984
PCSK1N	-5.24	8	-1.35	0.0884	1328	0.972	0.912	16601	0.984
CGN	-5.24	8	-1.35	0.0884	1329	0.972	0.912	16600	0.984
ANXA7	-5.24	8	-1.35	0.0885	1330	0.972	0.911	16599	0.984
SNX6	-5.24	8	-1.35	0.0885	1331	0.972	0.911	16598	0.984
CLPTM1	-5.24	8	-1.35	0.0886	1332	0.972	0.911	16597	0.984
TMEM150B	-5.24	8	-1.35	0.0886	1333	0.972	0.911	16596	0.984
EIF3L	-5.24	8	-1.35	0.0886	1334	0.972	0.911	16595	0.984
PIGR	-5.24	8	-1.35	0.0887	1335	0.972	0.911	16594	0.984
C1orf227	-5.23	8	-1.35	0.0888	1336	0.972	0.911	16593	0.984
NRAP	-5.23	8	-1.35	0.0888	1337	0.972	0.911	16592	0.984
LGI4	-5.23	8	-1.35	0.0891	1338	0.972	0.911	16591	0.984
DHX16	-5.22	8	-1.35	0.0892	1339	0.972	0.911	16590	0.984
FOXA1	-5.22	8	-1.35	0.0892	1340	0.972	0.911	16589	0.984
IRF2BP2	-5.22	8	-1.35	0.0893	1341	0.972	0.911	16588	0.984
STRN4	-5.22	8	-1.35	0.0893	1342	0.972	0.911	16587	0.984
METTL20	-5.22	8	-1.35	0.0893	1343	0.972	0.911	16586	0.984
C8G	-5.22	8	-1.35	0.0893	1344	0.972	0.911	16585	0.984
SUV39H2	-5.22	8	-1.34	0.0894	1345	0.972	0.911	16584	0.984
ANKRD2	-5.22	8	-1.34	0.0894	1346	0.972	0.911	16583	0.984
CDK7	-5.22	8	-1.34	0.0894	1347	0.972	0.911	16582	0.984
PTTG1IP	-5.22	8	-1.34	0.0895	1348	0.972	0.911	16581	0.984
PHB	-5.22	8	-1.34	0.0895	1349	0.972	0.911	16580	0.984
ALAS1	-5.21	8	-1.34	0.0896	1350	0.972	0.91	16579	0.984
ADAM22	-5.21	8	-1.34	0.0897	1351	0.972	0.91	16578	0.984
GDF15	-5.21	8	-1.34	0.0897	1352	0.972	0.91	16577	0.984
PDX1	-5.21	8	-1.34	0.0898	1353	0.972	0.91	16576	0.984
WTIP	-5.21	8	-1.34	0.0899	1354	0.972	0.91	16575	0.984
PPP1R11	-5.2	8	-1.34	0.0901	1355	0.972	0.91	16574	0.984
TRIM72	-5.2	8	-1.34	0.0901	1356	0.972	0.91	16573	0.984
FOXN2	-5.2	8	-1.34	0.0902	1357	0.972	0.91	16572	0.984
TEAD4	-5.2	8	-1.34	0.0903	1358	0.972	0.91	16571	0.984
FKBP3	-5.2	8	-1.34	0.0904	1359	0.972	0.91	16570	0.984
ULK1	-5.2	8	-1.34	0.0904	1360	0.972	0.91	16569	0.984
MAP4K1	-5.19	8	-1.34	0.0905	1361	0.972	0.909	16568	0.984
CLIP1	-5.19	8	-1.34	0.0905	1362	0.972	0.909	16567	0.984
LAS1L	-5.19	8	-1.34	0.0906	1363	0.972	0.909	16566	0.984
WFIKKN1	-5.19	8	-1.34	0.0906	1364	0.972	0.909	16565	0.984
FARSB	-5.19	8	-1.34	0.0906	1365	0.972	0.909	16564	0.984
THOC2	-5.19	8	-1.34	0.0906	1366	0.972	0.909	16563	0.984
C6orf47	-5.19	8	-1.34	0.0907	1367	0.972	0.909	16562	0.984
FAM76B	-5.19	8	-1.34	0.0909	1368	0.972	0.909	16561	0.984
NSUN5	-5.18	8	-1.34	0.0909	1369	0.972	0.909	16560	0.984
PLEK2	-5.18	8	-1.34	0.0909	1370	0.972	0.909	16559	0.984
GLRX5	-5.18	8	-1.34	0.0909	1371	0.972	0.909	16558	0.984
DLX1	-5.18	8	-1.34	0.0909	1372	0.972	0.909	16557	0.984
GSK3A	-5.18	8	-1.33	0.091	1373	0.972	0.909	16556	0.984
PSMB4	-5.18	8	-1.33	0.091	1374	0.972	0.909	16555	0.984
RSRC2	-5.18	8	-1.33	0.0911	1375	0.972	0.909	16554	0.984
DHDH	-5.17	8	-1.33	0.0913	1376	0.972	0.909	16553	0.984
GTF3C3	-5.17	8	-1.33	0.0913	1377	0.972	0.909	16552	0.984
CNKSR1	-4.48	6	-1.33	0.0914	1378	0.972	0.909	16551	0.984
SLC39A1	-5.17	8	-1.33	0.0914	1379	0.972	0.909	16550	0.984
KCNK17	-5.17	8	-1.33	0.0914	1380	0.972	0.909	16549	0.984
ESRP2	-5.17	8	-1.33	0.0914	1381	0.972	0.909	16548	0.984
ZNF835	-5.17	8	-1.33	0.0915	1382	0.972	0.909	16547	0.984
ALX1	-5.17	8	-1.33	0.0915	1383	0.972	0.909	16546	0.984
NICN1	-5.17	8	-1.33	0.0915	1384	0.972	0.908	16545	0.984
C11orf48	-5.17	8	-1.33	0.0917	1385	0.972	0.908	16544	0.984
CTNND1	-5.16	8	-1.33	0.0917	1386	0.972	0.908	16543	0.984
HIST1H2BJ	-2.58	2	-1.33	0.0918	1387	0.972	0.908	16542	0.984
CDK16	-5.16	8	-1.33	0.0919	1388	0.972	0.908	16541	0.984
P4HA1	-5.16	8	-1.33	0.0921	1389	0.972	0.908	16540	0.984
BCAT2	-5.16	8	-1.33	0.0921	1390	0.972	0.908	16539	0.984
ZCCHC24	-5.16	8	-1.33	0.0922	1391	0.972	0.908	16538	0.984
RGS9BP	-5.15	8	-1.33	0.0922	1392	0.972	0.908	16537	0.984
RPL4	-5.15	8	-1.33	0.0922	1393	0.972	0.908	16536	0.984
CPOX	-5.15	8	-1.33	0.0922	1394	0.972	0.908	16535	0.984
PRIM1	-5.15	8	-1.33	0.0923	1395	0.972	0.908	16534	0.984
RAB15	-5.15	8	-1.33	0.0924	1396	0.972	0.908	16533	0.984
CMPK1	-5.15	8	-1.33	0.0924	1397	0.972	0.908	16532	0.984
SCARA3	-5.15	8	-1.33	0.0925	1398	0.972	0.908	16531	0.984
TCEA2	-5.15	8	-1.33	0.0926	1399	0.972	0.907	16530	0.984
RAPGEF3	-5.15	8	-1.33	0.0926	1400	0.972	0.907	16529	0.984
RCOR1	-5.14	8	-1.32	0.0927	1401	0.972	0.907	16528	0.984
LPAR3	-5.14	8	-1.32	0.0927	1402	0.972	0.907	16527	0.984
ZBTB4	-5.14	8	-1.32	0.0927	1403	0.972	0.907	16526	0.984
DGKD	-5.14	8	-1.32	0.0928	1404	0.972	0.907	16525	0.984
H1FOO	-5.14	8	-1.32	0.0928	1405	0.972	0.907	16524	0.984
FKBP8	-5.14	8	-1.32	0.093	1406	0.972	0.907	16523	0.984
RBM15B	-5.14	8	-1.32	0.093	1407	0.972	0.907	16522	0.984
CHRNB2	-5.13	8	-1.32	0.0931	1408	0.972	0.907	16521	0.984
TIGIT	-5.13	8	-1.32	0.0931	1409	0.972	0.907	16520	0.984
MLST8	-5.13	8	-1.32	0.0933	1410	0.972	0.907	16519	0.984
SIGLEC8	-5.13	8	-1.32	0.0933	1411	0.972	0.907	16518	0.984
PRKACA	-5.13	8	-1.32	0.0934	1412	0.972	0.907	16517	0.984
POLR3E	-5.13	8	-1.32	0.0935	1413	0.972	0.907	16516	0.984
S100A3	-5.13	8	-1.32	0.0935	1414	0.972	0.906	16515	0.984
FAM186B	-4.79	7	-1.32	0.0935	1415	0.972	0.906	16514	0.984
FUK	-5.13	8	-1.32	0.0935	1416	0.972	0.906	16513	0.984
DBP	-5.12	8	-1.32	0.0936	1417	0.972	0.906	16512	0.984
RICTOR	-5.12	8	-1.32	0.0937	1418	0.972	0.906	16511	0.984
FERD3L	-5.12	8	-1.32	0.0937	1419	0.972	0.906	16510	0.984
KCNK6	-5.12	8	-1.32	0.0937	1420	0.972	0.906	16509	0.984
C10orf95	-5.12	8	-1.32	0.0938	1421	0.972	0.906	16508	0.984
NAA60	-5.12	8	-1.32	0.0938	1422	0.972	0.906	16507	0.984
NFKBIB	-5.11	8	-1.32	0.094	1423	0.972	0.906	16506	0.984
TRAPPC6B	-5.11	8	-1.32	0.0941	1424	0.972	0.906	16505	0.984
WASF2	-5.11	8	-1.32	0.0942	1425	0.972	0.906	16504	0.984
ABCB10	-5.11	8	-1.32	0.0942	1426	0.972	0.906	16503	0.984
PRDX2	-5.11	8	-1.32	0.0942	1427	0.972	0.906	16502	0.984
ZNF496	-5.11	8	-1.32	0.0942	1428	0.972	0.906	16501	0.984
GTSE1	-5.11	8	-1.31	0.0943	1429	0.972	0.906	16500	0.984
EXD3	-5.11	8	-1.31	0.0943	1430	0.972	0.906	16499	0.984
INTS4	-5.11	8	-1.31	0.0944	1431	0.972	0.906	16498	0.984
RAD54L2	-5.11	8	-1.31	0.0944	1432	0.972	0.906	16497	0.984
AURKC	-5.1	8	-1.31	0.0945	1433	0.972	0.905	16496	0.984
AC016722.1	-5.1	8	-1.31	0.0946	1434	0.972	0.905	16495	0.984
TLL2	-5.1	8	-1.31	0.0948	1435	0.972	0.905	16494	0.984
SEC61G	-4.41	6	-1.31	0.0948	1436	0.972	0.905	16493	0.984
DNMT3B	-5.1	8	-1.31	0.0948	1437	0.972	0.905	16492	0.984
RCOR2	-5.1	8	-1.31	0.0949	1438	0.972	0.905	16491	0.984
RXFP4	-5.09	8	-1.31	0.0949	1439	0.972	0.905	16490	0.984
ZDHHC7	-5.09	8	-1.31	0.0949	1440	0.972	0.905	16489	0.984
REN	-5.09	8	-1.31	0.0949	1441	0.972	0.905	16488	0.984
TIMM17B	-5.09	8	-1.31	0.095	1442	0.972	0.905	16487	0.984
PRR24	-5.09	8	-1.31	0.095	1443	0.972	0.905	16486	0.984
CDC23	-5.09	8	-1.31	0.0951	1444	0.972	0.905	16485	0.984
ELL	-5.09	8	-1.31	0.0953	1445	0.972	0.905	16484	0.984
ACADL	-5.09	8	-1.31	0.0953	1446	0.972	0.905	16483	0.984
PRAP1	-5.08	8	-1.31	0.0954	1447	0.972	0.905	16482	0.984
GLIS1	-5.08	8	-1.31	0.0954	1448	0.972	0.905	16481	0.984
MYC	-5.08	8	-1.31	0.0955	1449	0.972	0.905	16480	0.984
HIST1H3F	-5.08	8	-1.31	0.0956	1450	0.972	0.904	16479	0.984
FOLR3	-5.08	8	-1.31	0.0956	1451	0.972	0.904	16478	0.984
BLVRB	-5.08	8	-1.31	0.0957	1452	0.972	0.904	16477	0.984
GPATCH4	-5.08	8	-1.31	0.0957	1453	0.972	0.904	16476	0.984
MRPS28	-5.08	8	-1.31	0.0957	1454	0.972	0.904	16475	0.984
SELENBP1	-5.08	8	-1.31	0.0957	1455	0.972	0.904	16474	0.984
PEX10	-5.08	8	-1.31	0.0958	1456	0.972	0.904	16473	0.984
ARL13B	-5.07	8	-1.31	0.0958	1457	0.972	0.904	16472	0.984
WFDC1	-5.07	8	-1.31	0.0959	1458	0.972	0.904	16471	0.984
STX5	-5.07	8	-1.3	0.096	1459	0.972	0.904	16470	0.984
NFRKB	-5.07	8	-1.3	0.0962	1460	0.972	0.904	16469	0.984
CACNA1F	-5.06	8	-1.3	0.0963	1461	0.972	0.904	16468	0.984
SLC22A7	-5.06	8	-1.3	0.0964	1462	0.972	0.904	16467	0.984
GRB2	-5.06	8	-1.3	0.0964	1463	0.972	0.904	16466	0.984
FAM181B	-4.73	7	-1.3	0.0965	1464	0.972	0.904	16465	0.984
MZF1	-5.06	8	-1.3	0.0965	1465	0.972	0.903	16464	0.984
YIPF3	-5.06	8	-1.3	0.0965	1466	0.972	0.903	16463	0.984
HSPA2	-5.06	8	-1.3	0.0966	1467	0.972	0.903	16462	0.984
PSEN2	-5.06	8	-1.3	0.0967	1468	0.972	0.903	16461	0.984
SNX33	-5.06	8	-1.3	0.0967	1469	0.972	0.903	16460	0.984
LDB1	-5.06	8	-1.3	0.0967	1470	0.972	0.903	16459	0.984
RFT1	-5.05	8	-1.3	0.0967	1471	0.972	0.903	16458	0.984
PANX1	-5.05	8	-1.3	0.0969	1472	0.972	0.903	16457	0.984
FZD7	-5.05	8	-1.3	0.0969	1473	0.972	0.903	16456	0.984
SPATA3	-5.05	8	-1.3	0.0972	1474	0.972	0.903	16455	0.984
TOX	-5.04	8	-1.3	0.0974	1475	0.972	0.903	16454	0.983
DCTN6	-5.04	8	-1.3	0.0975	1476	0.972	0.903	16453	0.983
SCN1B	-5.04	8	-1.3	0.0975	1477	0.972	0.902	16452	0.983
MC4R	-5.04	8	-1.3	0.0975	1478	0.972	0.902	16451	0.983
ARFRP1	-5.04	8	-1.3	0.0976	1479	0.972	0.902	16450	0.983
CCDC9	-5.04	8	-1.3	0.0976	1480	0.972	0.902	16449	0.983
LIN7B	-5.04	8	-1.3	0.0976	1481	0.972	0.902	16448	0.983
EVX1	-5.03	8	-1.29	0.0977	1482	0.972	0.902	16447	0.983
KLRD1	-5.03	8	-1.29	0.0978	1483	0.972	0.902	16446	0.983
TCF19	-5.03	8	-1.29	0.0978	1484	0.972	0.902	16445	0.983
VPS26A	-5.03	8	-1.29	0.0978	1485	0.972	0.902	16444	0.983
TNPO2	-5.03	8	-1.29	0.0979	1486	0.972	0.902	16443	0.983
HIST1H1C	-5.03	8	-1.29	0.0981	1487	0.972	0.902	16442	0.983
MB21D2	-5.02	8	-1.29	0.0983	1488	0.972	0.902	16441	0.983
P2RY6	-5.02	8	-1.29	0.0984	1489	0.972	0.902	16440	0.983
PBLD	-5.02	8	-1.29	0.0984	1490	0.972	0.902	16439	0.983
ZNF672	-5.02	8	-1.29	0.0984	1491	0.972	0.902	16438	0.983
WRAP73	-5.02	8	-1.29	0.0985	1492	0.972	0.901	16437	0.983
TOMM40L	-5.01	8	-1.29	0.0987	1493	0.972	0.901	16436	0.983
SLC22A23	-5.01	8	-1.29	0.0987	1494	0.972	0.901	16435	0.983
ARL5B	-5.01	8	-1.29	0.0987	1495	0.972	0.901	16434	0.983
C12orf5	-5.01	8	-1.29	0.0987	1496	0.972	0.901	16433	0.983
KDM1B	-5.01	8	-1.29	0.0989	1497	0.972	0.901	16432	0.983
HOXB4	-5.01	8	-1.29	0.0989	1498	0.972	0.901	16431	0.983
SCAMP2	-5.01	8	-1.29	0.099	1499	0.972	0.901	16430	0.983
DDB1	-5.01	8	-1.29	0.099	1500	0.972	0.901	16429	0.983
GFRA4	-5	8	-1.29	0.0991	1501	0.972	0.901	16428	0.983
TBCC	-5	8	-1.29	0.0991	1502	0.972	0.901	16427	0.983
CLCNKB	-5	8	-1.29	0.0993	1503	0.972	0.901	16426	0.983
C14orf180	-5	8	-1.29	0.0993	1504	0.972	0.901	16425	0.983
ANGPTL4	-5	8	-1.28	0.0994	1505	0.972	0.901	16424	0.983
ATG14	-4.99	8	-1.28	0.0996	1506	0.972	0.9	16423	0.983
EXT1	-4.99	8	-1.28	0.0996	1507	0.972	0.9	16422	0.983
SLC29A2	-4.99	8	-1.28	0.0996	1508	0.972	0.9	16421	0.983
HELZ2	-4.99	8	-1.28	0.0996	1509	0.972	0.9	16420	0.983
BSPRY	-4.99	8	-1.28	0.0996	1510	0.972	0.9	16419	0.983
AMN	-4.99	8	-1.28	0.0997	1511	0.972	0.9	16418	0.983
YIF1B	-4.99	8	-1.28	0.0997	1512	0.972	0.9	16417	0.983
NR0B2	-4.99	8	-1.28	0.0997	1513	0.972	0.9	16416	0.983
TMEM79	-4.99	8	-1.28	0.0997	1514	0.972	0.9	16415	0.983
GPT2	-4.99	8	-1.28	0.0998	1515	0.972	0.9	16414	0.983
STXBP2	-4.99	8	-1.28	0.0998	1516	0.972	0.9	16413	0.983
MCOLN1	-4.99	8	-1.28	0.0999	1517	0.972	0.9	16412	0.983
MEF2BNB	-4.99	8	-1.28	0.1	1518	0.972	0.9	16411	0.983
SIX5	-4.98	8	-1.28	0.1	1519	0.972	0.9	16410	0.983
KLHDC8A	-4.98	8	-1.28	0.1	1520	0.972	0.9	16409	0.983
ATG2A	-4.98	8	-1.28	0.1	1521	0.972	0.9	16408	0.983
VSIG8	-4.98	8	-1.28	0.1	1522	0.972	0.9	16407	0.983
EPHA2	-4.98	8	-1.28	0.1	1523	0.972	0.9	16406	0.983
CASC3	-4.98	8	-1.28	0.1	1524	0.972	0.9	16405	0.983
USP34	-4.97	8	-1.28	0.101	1525	0.972	0.899	16404	0.983
LRRC58	-4.97	8	-1.28	0.101	1526	0.972	0.899	16403	0.983
KCNC4	-4.97	8	-1.28	0.101	1527	0.972	0.899	16402	0.983
CD34	-4.97	8	-1.28	0.101	1528	0.972	0.899	16401	0.983
ADAT3	-4.97	8	-1.28	0.101	1529	0.972	0.899	16400	0.983
DDX43	-4.97	8	-1.28	0.101	1530	0.972	0.899	16399	0.983
F3	-4.97	8	-1.28	0.101	1531	0.972	0.899	16398	0.983
FAM98A	-4.96	8	-1.28	0.101	1532	0.972	0.899	16397	0.983
PLLP	-4.96	8	-1.28	0.101	1533	0.972	0.899	16396	0.983
OR6F1	-4.96	8	-1.28	0.101	1534	0.972	0.899	16395	0.983
CAPS	-4.96	8	-1.28	0.101	1535	0.972	0.899	16394	0.983
LSR	-4.96	8	-1.27	0.101	1536	0.972	0.899	16393	0.983
TIGD5	-4.96	8	-1.27	0.101	1537	0.972	0.899	16392	0.983
LETM1	-4.29	6	-1.27	0.101	1538	0.972	0.899	16391	0.983
DDX50	-4.96	8	-1.27	0.101	1539	0.972	0.899	16390	0.983
IER2	-4.96	8	-1.27	0.101	1540	0.972	0.899	16389	0.983
OSGIN1	-4.96	8	-1.27	0.101	1541	0.972	0.899	16388	0.983
SGPL1	-4.95	8	-1.27	0.101	1542	0.972	0.899	16387	0.983
PGPEP1L	-4.95	8	-1.27	0.102	1543	0.972	0.898	16386	0.983
IQSEC1	-4.95	8	-1.27	0.102	1544	0.972	0.898	16385	0.983
OTC	-4.95	8	-1.27	0.102	1545	0.972	0.898	16384	0.983
KCNJ8	-4.95	8	-1.27	0.102	1546	0.972	0.898	16383	0.983
CXorf23	-4.94	8	-1.27	0.102	1547	0.972	0.898	16382	0.983
MAMDC4	-4.94	8	-1.27	0.102	1548	0.972	0.898	16381	0.983
C2CD4A	-4.94	8	-1.27	0.102	1549	0.972	0.898	16380	0.983
B3GALT4	-4.94	8	-1.27	0.102	1550	0.972	0.898	16379	0.983
MOB3A	-4.94	8	-1.27	0.102	1551	0.972	0.898	16378	0.983
AGO1	-4.94	8	-1.27	0.102	1552	0.972	0.898	16377	0.983
OR10H3	-4.94	8	-1.27	0.102	1553	0.972	0.898	16376	0.983
BTN3A1	-4.93	8	-1.27	0.102	1554	0.972	0.898	16375	0.983
PNO1	-4.93	8	-1.27	0.102	1555	0.972	0.898	16374	0.983
SYNGR4	-4.93	8	-1.27	0.103	1556	0.972	0.897	16373	0.983
SRPK1	-4.93	8	-1.27	0.103	1557	0.972	0.897	16372	0.983
CLASRP	-4.93	8	-1.27	0.103	1558	0.972	0.897	16371	0.982
NAA25	-4.92	8	-1.26	0.103	1559	0.972	0.897	16370	0.982
RHO	-4.92	8	-1.26	0.103	1560	0.972	0.897	16369	0.982
GNAI3	-4.92	8	-1.26	0.103	1561	0.972	0.897	16368	0.982
ANKRD36C	-4.92	8	-1.26	0.103	1562	0.972	0.897	16367	0.982
C1QTNF4	-4.92	8	-1.26	0.103	1563	0.972	0.897	16366	0.982
AURKA	-4.92	8	-1.26	0.103	1564	0.972	0.897	16365	0.982
PKD1	-4.92	8	-1.26	0.103	1565	0.972	0.897	16364	0.982
GTF2A1	-4.92	8	-1.26	0.103	1566	0.972	0.897	16363	0.982
ITPKB	-4.91	8	-1.26	0.103	1567	0.972	0.897	16362	0.982
TNNC1	-4.91	8	-1.26	0.103	1568	0.972	0.897	16361	0.982
PDZD7	-4.91	8	-1.26	0.104	1569	0.972	0.896	16360	0.982
VSTM2B	-4.91	8	-1.26	0.104	1570	0.972	0.896	16359	0.982
ASPG	-4.91	8	-1.26	0.104	1571	0.972	0.896	16358	0.982
HIGD1C	-4.91	8	-1.26	0.104	1572	0.972	0.896	16357	0.982
CCNJ	-4.9	8	-1.26	0.104	1573	0.972	0.896	16356	0.982
FNTA	-4.9	8	-1.26	0.104	1574	0.972	0.896	16355	0.982
NR1I3	-4.9	8	-1.26	0.104	1575	0.972	0.896	16354	0.982
CNGB3	-4.9	8	-1.26	0.104	1576	0.972	0.896	16353	0.982
RUNX1T1	-4.9	8	-1.26	0.104	1577	0.972	0.896	16352	0.982
HEMK1	-4.9	8	-1.26	0.104	1578	0.972	0.896	16351	0.982
FUT8	-4.9	8	-1.26	0.104	1579	0.972	0.896	16350	0.982
FANCM	-4.9	8	-1.26	0.104	1580	0.972	0.896	16349	0.982
B3GNT4	-4.58	7	-1.26	0.104	1581	0.972	0.896	16348	0.982
NPHS1	-4.89	8	-1.26	0.104	1582	0.972	0.896	16347	0.982
LIMS2	-4.89	8	-1.26	0.105	1583	0.972	0.895	16346	0.982
NOTCH4	-4.23	6	-1.26	0.105	1584	0.972	0.895	16345	0.982
POGLUT1	-4.89	8	-1.26	0.105	1585	0.972	0.895	16344	0.982
CRYAA	-4.89	8	-1.25	0.105	1586	0.972	0.895	16343	0.982
PTHLH	-4.89	8	-1.25	0.105	1587	0.972	0.895	16342	0.982
ZNF467	-4.89	8	-1.25	0.105	1588	0.972	0.895	16341	0.982
TUBB4B	-4.89	8	-1.25	0.105	1589	0.972	0.895	16340	0.982
ADAMTS9	-4.88	8	-1.25	0.105	1590	0.972	0.895	16339	0.982
CDC37	-4.88	8	-1.25	0.105	1591	0.972	0.895	16338	0.982
AVPI1	-4.87	8	-1.25	0.105	1592	0.972	0.895	16337	0.982
LHFPL3	-4.87	8	-1.25	0.105	1593	0.972	0.895	16336	0.982
LDB3	-4.87	8	-1.25	0.105	1594	0.972	0.895	16335	0.982
AK4	-4.87	8	-1.25	0.105	1595	0.972	0.895	16334	0.982
PRTN3	-4.87	8	-1.25	0.106	1596	0.972	0.894	16333	0.982
ITGB6	-4.87	8	-1.25	0.106	1597	0.972	0.894	16332	0.982
DZIP1L	-4.87	8	-1.25	0.106	1598	0.972	0.894	16331	0.982
FGF23	-4.87	8	-1.25	0.106	1599	0.972	0.894	16330	0.982
STRA8	-4.87	8	-1.25	0.106	1600	0.972	0.894	16329	0.982
GTF2E2	-4.86	8	-1.25	0.106	1601	0.972	0.894	16328	0.982
CNFN	-4.86	8	-1.25	0.106	1602	0.972	0.894	16327	0.982
FAIM3	-4.86	8	-1.25	0.106	1603	0.972	0.894	16326	0.982
FADD	-4.86	8	-1.25	0.106	1604	0.972	0.894	16325	0.982
C2orf54	-4.86	8	-1.25	0.106	1605	0.972	0.894	16324	0.982
AMPD2	-4.85	8	-1.25	0.106	1606	0.972	0.894	16323	0.982
RNH1	-4.85	8	-1.25	0.106	1607	0.972	0.894	16322	0.982
PXMP4	-4.85	8	-1.25	0.106	1608	0.972	0.894	16321	0.982
TLR9	-4.85	8	-1.25	0.107	1609	0.972	0.893	16320	0.981
EPRS	-4.85	8	-1.24	0.107	1610	0.972	0.893	16319	0.981
DNA2	-4.85	8	-1.24	0.107	1611	0.972	0.893	16318	0.981
DARC	-4.84	8	-1.24	0.107	1612	0.972	0.893	16317	0.981
PRELP	-4.84	8	-1.24	0.107	1613	0.972	0.893	16316	0.981
GPRC5A	-4.84	8	-1.24	0.107	1614	0.972	0.893	16315	0.981
C3orf56	-4.84	8	-1.24	0.107	1615	0.972	0.893	16314	0.981
MAP3K11	-4.84	8	-1.24	0.107	1616	0.972	0.893	16313	0.981
PODXL2	-4.84	8	-1.24	0.107	1617	0.972	0.893	16312	0.981
KRTDAP	-4.84	8	-1.24	0.107	1618	0.972	0.893	16311	0.981
SLC1A4	-4.83	8	-1.24	0.107	1619	0.972	0.893	16310	0.981
RAB7L1	-4.83	8	-1.24	0.107	1620	0.972	0.893	16309	0.981
NCL	-4.83	8	-1.24	0.107	1621	0.972	0.893	16308	0.981
DLG5	-4.83	8	-1.24	0.107	1622	0.972	0.893	16307	0.981
HIST1H1D	-4.83	8	-1.24	0.107	1623	0.972	0.893	16306	0.981
NENF	-4.83	8	-1.24	0.107	1624	0.972	0.893	16305	0.981
COPG1	-4.83	8	-1.24	0.107	1625	0.972	0.893	16304	0.981
KEAP1	-4.83	8	-1.24	0.108	1626	0.972	0.892	16303	0.981
FLOT1	-4.83	8	-1.24	0.108	1627	0.972	0.892	16302	0.981
CHST5	-4.82	8	-1.24	0.108	1628	0.972	0.892	16301	0.981
PTPN23	-4.82	8	-1.24	0.108	1629	0.972	0.892	16300	0.981
KCTD17	-4.82	8	-1.24	0.108	1630	0.972	0.892	16299	0.981
HTATIP2	-4.82	8	-1.24	0.108	1631	0.972	0.892	16298	0.981
POMGNT2	-4.82	8	-1.24	0.108	1632	0.972	0.892	16297	0.981
IZUMO1	-4.82	8	-1.24	0.108	1633	0.972	0.892	16296	0.981
TRNAU1AP	-4.82	8	-1.24	0.108	1634	0.972	0.892	16295	0.981
MED20	-4.82	8	-1.24	0.108	1635	0.972	0.892	16294	0.981
ZSCAN22	-4.82	8	-1.24	0.108	1636	0.972	0.892	16293	0.981
ZGLP1	-4.81	8	-1.24	0.108	1637	0.972	0.892	16292	0.981
COPE	-4.81	8	-1.24	0.108	1638	0.972	0.892	16291	0.981
ANTXR1	-4.81	8	-1.24	0.108	1639	0.972	0.892	16290	0.981
RPS27A	-2.41	2	-1.23	0.108	1640	0.972	0.892	16289	0.981
AANAT	-4.81	8	-1.23	0.109	1641	0.972	0.891	16288	0.981
DYTN	-4.81	8	-1.23	0.109	1642	0.972	0.891	16287	0.981
SH3GL3	-4.81	8	-1.23	0.109	1643	0.972	0.891	16286	0.981
TCF24	-4.81	8	-1.23	0.109	1644	0.972	0.891	16285	0.981
IL10	-4.81	8	-1.23	0.109	1645	0.972	0.891	16284	0.981
ANKS1B	-4.8	8	-1.23	0.109	1646	0.972	0.891	16283	0.981
TSPAN7	-4.8	8	-1.23	0.109	1647	0.972	0.891	16282	0.981
C1orf122	-4.8	8	-1.23	0.109	1648	0.972	0.891	16281	0.981
HHEX	-4.8	8	-1.23	0.109	1649	0.972	0.891	16280	0.981
CCL1	-4.8	8	-1.23	0.109	1650	0.972	0.891	16279	0.981
HESX1	-4.8	8	-1.23	0.109	1651	0.972	0.891	16278	0.981
CHMP7	-4.8	8	-1.23	0.109	1652	0.972	0.891	16277	0.981
TINAGL1	-4.8	8	-1.23	0.109	1653	0.972	0.891	16276	0.981
MOV10	-4.8	8	-1.23	0.109	1654	0.972	0.891	16275	0.981
EMC10	-4.79	8	-1.23	0.109	1655	0.972	0.891	16274	0.981
ELP3	-4.79	8	-1.23	0.109	1656	0.972	0.891	16273	0.981
PARD6A	-4.79	8	-1.23	0.109	1657	0.972	0.891	16272	0.981
CFD	-4.79	8	-1.23	0.11	1658	0.972	0.89	16271	0.981
CCDC101	-4.79	8	-1.23	0.11	1659	0.972	0.89	16270	0.981
CKM	-4.79	8	-1.23	0.11	1660	0.972	0.89	16269	0.981
CHRNB1	-4.78	8	-1.23	0.11	1661	0.972	0.89	16268	0.981
IFI6	-4.78	8	-1.23	0.11	1662	0.972	0.89	16267	0.981
DHRS9	-4.78	8	-1.23	0.11	1663	0.972	0.89	16266	0.981
FCGBP	-4.78	8	-1.23	0.11	1664	0.972	0.89	16265	0.981
KRT5	-4.77	8	-1.22	0.11	1665	0.972	0.89	16264	0.981
CSPG5	-4.77	8	-1.22	0.11	1666	0.972	0.89	16263	0.981
PAN2	-4.77	8	-1.22	0.11	1667	0.972	0.89	16262	0.981
TNFRSF1A	-4.77	8	-1.22	0.11	1668	0.972	0.89	16261	0.981
TMEM259	-4.77	8	-1.22	0.111	1669	0.972	0.889	16260	0.981
MT1HL1	-3.37	4	-1.22	0.111	1670	0.972	0.889	16259	0.981
ALKBH7	-4.77	8	-1.22	0.111	1671	0.972	0.889	16258	0.981
CYTH4	-4.77	8	-1.22	0.111	1672	0.972	0.889	16257	0.981
RBFOX3	-4.77	8	-1.22	0.111	1673	0.972	0.889	16256	0.981
CBY3	-4.77	8	-1.22	0.111	1674	0.972	0.889	16255	0.981
SUSD4	-4.76	8	-1.22	0.111	1675	0.972	0.889	16254	0.981
MRPL55	-4.76	8	-1.22	0.111	1676	0.972	0.889	16253	0.981
TRMT61A	-4.76	8	-1.22	0.111	1677	0.972	0.889	16252	0.981
GAL3ST4	-4.76	8	-1.22	0.111	1678	0.972	0.889	16251	0.981
PEA15	-4.76	8	-1.22	0.111	1679	0.972	0.889	16250	0.981
SLC2A10	-4.76	8	-1.22	0.111	1680	0.972	0.889	16249	0.981
MIEN1	-4.76	8	-1.22	0.111	1681	0.972	0.889	16248	0.981
AKR1E2	-4.76	8	-1.22	0.111	1682	0.972	0.889	16247	0.981
DYNC1LI1	-4.76	8	-1.22	0.111	1683	0.972	0.889	16246	0.981
CHPT1	-4.76	8	-1.22	0.111	1684	0.972	0.889	16245	0.981
WAPAL	-4.76	8	-1.22	0.111	1685	0.972	0.889	16244	0.981
ZNF566	-4.75	8	-1.22	0.111	1686	0.972	0.889	16243	0.981
FRAT1	-4.75	8	-1.22	0.112	1687	0.972	0.888	16242	0.981
PCBD1	-4.75	8	-1.22	0.112	1688	0.972	0.888	16241	0.981
TPST2	-4.75	8	-1.22	0.112	1689	0.972	0.888	16240	0.981
RFX1	-4.75	8	-1.22	0.112	1690	0.972	0.888	16239	0.981
CYB561D1	-4.75	8	-1.22	0.112	1691	0.972	0.888	16238	0.981
MICU1	-4.75	8	-1.22	0.112	1692	0.972	0.888	16237	0.981
POLR3GL	-4.75	8	-1.22	0.112	1693	0.972	0.888	16236	0.981
PCP4L1	-4.75	8	-1.22	0.112	1694	0.972	0.888	16235	0.981
HSF1	-4.75	8	-1.22	0.112	1695	0.972	0.888	16234	0.981
NANOS2	-4.75	8	-1.22	0.112	1696	0.972	0.888	16233	0.981
LRRC25	-4.75	8	-1.22	0.112	1697	0.972	0.888	16232	0.981
PRRX1	-4.75	8	-1.22	0.112	1698	0.972	0.888	16231	0.981
GSG1	-4.74	8	-1.22	0.112	1699	0.972	0.888	16230	0.981
PSMG3	-4.74	8	-1.22	0.112	1700	0.972	0.888	16229	0.981
CYB561D2	-4.74	8	-1.22	0.112	1701	0.972	0.888	16228	0.981
HSD11B1	-4.74	8	-1.22	0.112	1702	0.972	0.888	16227	0.981
SP7	-4.74	8	-1.22	0.112	1703	0.972	0.888	16226	0.981
ASNA1	-4.74	8	-1.22	0.112	1704	0.972	0.888	16225	0.981
ASH2L	-4.74	8	-1.22	0.112	1705	0.972	0.888	16224	0.981
ESYT3	-4.74	8	-1.22	0.112	1706	0.972	0.888	16223	0.981
CSDE1	-4.74	8	-1.22	0.112	1707	0.972	0.888	16222	0.981
REM2	-4.74	8	-1.22	0.112	1708	0.972	0.888	16221	0.981
PHC2	-4.74	8	-1.22	0.112	1709	0.972	0.888	16220	0.981
NXNL1	-4.74	8	-1.22	0.112	1710	0.972	0.888	16219	0.981
VPS37D	-4.74	8	-1.21	0.112	1711	0.972	0.888	16218	0.981
ZNF860	-3.35	4	-1.21	0.112	1712	0.972	0.888	16217	0.981
IPO4	-4.74	8	-1.21	0.112	1713	0.972	0.888	16216	0.981
ASRGL1	-4.74	8	-1.21	0.112	1714	0.972	0.888	16215	0.981
FAM216A	-4.74	8	-1.21	0.112	1715	0.972	0.888	16214	0.981
CASQ1	-4.73	8	-1.21	0.113	1716	0.972	0.887	16213	0.981
NAMPT	-4.73	8	-1.21	0.113	1717	0.972	0.887	16212	0.981
MON1A	-4.73	8	-1.21	0.113	1718	0.972	0.887	16211	0.981
PTPRO	-4.73	8	-1.21	0.113	1719	0.972	0.887	16210	0.981
MON1B	-4.73	8	-1.21	0.113	1720	0.972	0.887	16209	0.981
SPARC	-4.73	8	-1.21	0.113	1721	0.972	0.887	16208	0.981
P2RX5	-4.73	8	-1.21	0.113	1722	0.972	0.887	16207	0.981
HTR3E	-4.72	8	-1.21	0.113	1723	0.972	0.887	16206	0.981
SHE	-4.72	8	-1.21	0.113	1724	0.972	0.887	16205	0.981
RENBP	-4.72	8	-1.21	0.113	1725	0.972	0.887	16204	0.981
LMCD1	-4.72	8	-1.21	0.113	1726	0.972	0.887	16203	0.981
CAPRIN1	-4.72	8	-1.21	0.113	1727	0.972	0.887	16202	0.981
CHCHD1	-4.72	8	-1.21	0.113	1728	0.972	0.887	16201	0.981
KLF17	-4.71	8	-1.21	0.113	1729	0.972	0.887	16200	0.981
LENG9	-4.71	8	-1.21	0.113	1730	0.972	0.887	16199	0.981
GNB3	-4.71	8	-1.21	0.114	1731	0.972	0.886	16198	0.981
SMARCE1	-4.71	8	-1.21	0.114	1732	0.972	0.886	16197	0.981
ERBB3	-4.71	8	-1.21	0.114	1733	0.972	0.886	16196	0.981
EPC1	-4.71	8	-1.21	0.114	1734	0.972	0.886	16195	0.981
ISCU	-4.71	8	-1.21	0.114	1735	0.972	0.886	16194	0.981
ELP5	-4.71	8	-1.21	0.114	1736	0.972	0.886	16193	0.981
SEL1L	-4.71	8	-1.21	0.114	1737	0.972	0.886	16192	0.981
SYNJ2	-4.71	8	-1.21	0.114	1738	0.972	0.886	16191	0.981
C14orf142	-4.08	6	-1.21	0.114	1739	0.972	0.886	16190	0.981
PRDM16	-4.71	8	-1.21	0.114	1740	0.972	0.886	16189	0.981
NES	-4.71	8	-1.21	0.114	1741	0.972	0.886	16188	0.981
PIP5K1A	-4.7	8	-1.21	0.114	1742	0.972	0.886	16187	0.981
FBXL2	-4.7	8	-1.21	0.114	1743	0.972	0.886	16186	0.981
LIPM	-4.7	8	-1.21	0.114	1744	0.972	0.886	16185	0.981
YAE1D1	-4.7	8	-1.2	0.114	1745	0.972	0.886	16184	0.981
ABCB9	-4.7	8	-1.2	0.114	1746	0.972	0.886	16183	0.981
FAM161B	-4.7	8	-1.2	0.114	1747	0.972	0.886	16182	0.981
AASDHPPT	-4.7	8	-1.2	0.114	1748	0.972	0.886	16181	0.981
ELFN1	-4.7	8	-1.2	0.114	1749	0.972	0.886	16180	0.981
SYNE4	-4.69	8	-1.2	0.115	1750	0.972	0.885	16179	0.981
MGAT2	-4.69	8	-1.2	0.115	1751	0.972	0.885	16178	0.981
RRNAD1	-4.69	8	-1.2	0.115	1752	0.972	0.885	16177	0.981
TNP2	-4.68	8	-1.2	0.115	1753	0.972	0.885	16176	0.981
ATP5I	-4.68	8	-1.2	0.115	1754	0.972	0.885	16175	0.981
TMEM66	-4.68	8	-1.2	0.115	1755	0.972	0.885	16174	0.981
CCSAP	-4.68	8	-1.2	0.115	1756	0.972	0.885	16173	0.981
STEAP1B	-4.68	8	-1.2	0.115	1757	0.972	0.885	16172	0.981
MKNK2	-4.68	8	-1.2	0.115	1758	0.972	0.885	16171	0.981
CELF3	-4.68	8	-1.2	0.115	1759	0.972	0.885	16170	0.981
TAF13	-4.68	8	-1.2	0.115	1760	0.972	0.885	16169	0.981
SNAP47	-4.67	8	-1.2	0.116	1761	0.972	0.884	16168	0.981
ETV5	-4.67	8	-1.2	0.116	1762	0.972	0.884	16167	0.981
A4GALT	-4.67	8	-1.2	0.116	1763	0.972	0.884	16166	0.981
PIN1	-4.67	8	-1.2	0.116	1764	0.972	0.884	16165	0.981
CWC22	-4.67	8	-1.2	0.116	1765	0.972	0.884	16164	0.981
ADIPOR2	-4.67	8	-1.2	0.116	1766	0.972	0.884	16163	0.981
TH	-4.67	8	-1.2	0.116	1767	0.972	0.884	16162	0.981
RNASE4	-4.67	8	-1.2	0.116	1768	0.972	0.884	16161	0.981
SSTR1	-4.67	8	-1.2	0.116	1769	0.972	0.884	16160	0.981
HIPK4	-4.66	8	-1.19	0.116	1770	0.972	0.884	16159	0.981
ZNF706	-4.66	8	-1.19	0.116	1771	0.972	0.884	16158	0.981
SKOR2	-4.66	8	-1.19	0.116	1772	0.972	0.884	16157	0.981
DDX39A	-4.66	8	-1.19	0.116	1773	0.972	0.884	16156	0.981
WBP11	-4.66	8	-1.19	0.116	1774	0.972	0.884	16155	0.981
SPATA5L1	-4.66	8	-1.19	0.116	1775	0.972	0.884	16154	0.981
CYP3A5	-4.66	8	-1.19	0.117	1776	0.972	0.883	16153	0.981
PAXIP1	-4.65	8	-1.19	0.117	1777	0.972	0.883	16152	0.981
CYR61	-4.65	8	-1.19	0.117	1778	0.972	0.883	16151	0.981
C19orf54	-4.65	8	-1.19	0.117	1779	0.972	0.883	16150	0.981
LCN12	-4.65	8	-1.19	0.117	1780	0.972	0.883	16149	0.981
C4BPA	-4.65	8	-1.19	0.117	1781	0.972	0.883	16148	0.981
HPS1	-4.65	8	-1.19	0.117	1782	0.972	0.883	16147	0.981
ZC3H10	-4.65	8	-1.19	0.117	1783	0.972	0.883	16146	0.98
CUBN	-4.64	8	-1.19	0.117	1784	0.972	0.883	16145	0.98
GPR27	-4.64	8	-1.19	0.117	1785	0.972	0.883	16144	0.98
PIWIL1	-4.64	8	-1.19	0.117	1786	0.972	0.883	16143	0.98
SNRNP40	-4.64	8	-1.19	0.117	1787	0.972	0.883	16142	0.98
DESI2	-4.64	8	-1.19	0.117	1788	0.972	0.883	16141	0.98
ZDHHC23	-4.64	8	-1.19	0.117	1789	0.972	0.883	16140	0.98
ACTRT3	-4.64	8	-1.19	0.118	1790	0.972	0.882	16139	0.98
GAD2	-4.63	8	-1.19	0.118	1791	0.972	0.882	16138	0.98
MAPKAP1	-4.63	8	-1.19	0.118	1792	0.972	0.882	16137	0.98
IQCB1	-4.63	8	-1.19	0.118	1793	0.972	0.882	16136	0.98
PTGDR	-4.63	8	-1.19	0.118	1794	0.972	0.882	16135	0.98
SLC26A6	-4.63	8	-1.19	0.118	1795	0.972	0.882	16134	0.98
LYST	-4.63	8	-1.19	0.118	1796	0.972	0.882	16133	0.98
DUS4L	-4.63	8	-1.19	0.118	1797	0.972	0.882	16132	0.98
GSDMA	-4.63	8	-1.18	0.118	1798	0.972	0.882	16131	0.98
MBD4	-4.63	8	-1.18	0.118	1799	0.972	0.882	16130	0.98
COG4	-4.63	8	-1.18	0.118	1800	0.972	0.882	16129	0.98
SIX1	-4.62	8	-1.18	0.118	1801	0.972	0.882	16128	0.98
SEC63	-4.62	8	-1.18	0.118	1802	0.972	0.882	16127	0.98
RBM28	-4.62	8	-1.18	0.119	1803	0.972	0.881	16126	0.98
HERC2	-4.62	8	-1.18	0.119	1804	0.972	0.881	16125	0.98
SUSD3	-4.62	8	-1.18	0.119	1805	0.972	0.881	16124	0.98
NLRP6	-4.62	8	-1.18	0.119	1806	0.972	0.881	16123	0.98
LGI1	-4.32	7	-1.18	0.119	1807	0.972	0.881	16122	0.98
ACP2	-4.61	8	-1.18	0.119	1808	0.972	0.881	16121	0.98
CILP	-4.61	8	-1.18	0.119	1809	0.972	0.881	16120	0.98
GAR1	-4.61	8	-1.18	0.119	1810	0.972	0.881	16119	0.98
DUSP13	-4.61	8	-1.18	0.119	1811	0.972	0.881	16118	0.98
LRRC41	-4.61	8	-1.18	0.119	1812	0.972	0.881	16117	0.98
PSAP	-4.61	8	-1.18	0.119	1813	0.972	0.881	16116	0.98
TMX4	-4.61	8	-1.18	0.119	1814	0.972	0.881	16115	0.98
VAPB	-4.61	8	-1.18	0.119	1815	0.972	0.881	16114	0.98
MAVS	-4.61	8	-1.18	0.119	1816	0.972	0.881	16113	0.98
C1orf210	-4.61	8	-1.18	0.119	1817	0.972	0.881	16112	0.98
CABIN1	-4.61	8	-1.18	0.119	1818	0.972	0.881	16111	0.98
ITPKC	-4.61	8	-1.18	0.119	1819	0.972	0.881	16110	0.98
PTCD3	-4.61	8	-1.18	0.119	1820	0.972	0.881	16109	0.98
CCDC102A	-4.6	8	-1.18	0.119	1821	0.972	0.881	16108	0.98
PHLDB2	-4.6	8	-1.18	0.119	1822	0.972	0.881	16107	0.98
TBCA	-4.6	8	-1.18	0.12	1823	0.972	0.88	16106	0.98
TRIM10	-4.6	8	-1.18	0.12	1824	0.972	0.88	16105	0.98
ZMAT4	-4.6	8	-1.18	0.12	1825	0.972	0.88	16104	0.98
RRAS	-4.6	8	-1.18	0.12	1826	0.972	0.88	16103	0.98
HOXC4	-4.6	8	-1.18	0.12	1827	0.972	0.88	16102	0.98
KIAA1257	-4.6	8	-1.18	0.12	1828	0.972	0.88	16101	0.98
ARRDC1	-4.59	8	-1.18	0.12	1829	0.972	0.88	16100	0.98
UNCX	-4.59	8	-1.18	0.12	1830	0.972	0.88	16099	0.98
TTI1	-4.59	8	-1.18	0.12	1831	0.972	0.88	16098	0.98
ZMYND15	-4.59	8	-1.17	0.12	1832	0.972	0.88	16097	0.98
OR12D3	-4.59	8	-1.17	0.12	1833	0.972	0.88	16096	0.98
ZNF528	-4.59	8	-1.17	0.12	1834	0.972	0.88	16095	0.98
CXXC11	-4.58	8	-1.17	0.12	1835	0.972	0.88	16094	0.98
ARNT	-4.58	8	-1.17	0.12	1836	0.972	0.88	16093	0.98
BEST4	-4.58	8	-1.17	0.12	1837	0.972	0.88	16092	0.98
EBNA1BP2	-4.28	7	-1.17	0.121	1838	0.972	0.879	16091	0.98
ZNF45	-4.58	8	-1.17	0.121	1839	0.972	0.879	16090	0.98
FAM13C	-4.58	8	-1.17	0.121	1840	0.972	0.879	16089	0.98
FBXO21	-4.58	8	-1.17	0.121	1841	0.972	0.879	16088	0.98
TDRD3	-4.58	8	-1.17	0.121	1842	0.972	0.879	16087	0.98
CBLC	-4.57	8	-1.17	0.121	1843	0.972	0.879	16086	0.98
COL1A2	-4.57	8	-1.17	0.121	1844	0.972	0.879	16085	0.98
IARS2	-4.57	8	-1.17	0.121	1845	0.972	0.879	16084	0.98
TGFBR3	-4.57	8	-1.17	0.121	1846	0.972	0.879	16083	0.98
CACNA1E	-4.57	8	-1.17	0.121	1847	0.972	0.879	16082	0.98
NOL8	-4.56	8	-1.17	0.121	1848	0.972	0.879	16081	0.979
ADCK5	-3.95	6	-1.17	0.121	1849	0.972	0.879	16080	0.979
POLG	-4.56	8	-1.17	0.121	1850	0.972	0.879	16079	0.979
TNFSF11	-4.56	8	-1.17	0.122	1851	0.972	0.878	16078	0.979
FAM71A	-4.56	8	-1.17	0.122	1852	0.972	0.878	16077	0.979
NDUFB10	-4.56	8	-1.17	0.122	1853	0.972	0.878	16076	0.979
CCNK	-4.56	8	-1.17	0.122	1854	0.972	0.878	16075	0.979
MDM1	-4.56	8	-1.17	0.122	1855	0.972	0.878	16074	0.979
BAALC	-4.56	8	-1.17	0.122	1856	0.972	0.878	16073	0.979
MYLIP	-4.56	8	-1.17	0.122	1857	0.972	0.878	16072	0.979
FAM167B	-4.56	8	-1.17	0.122	1858	0.972	0.878	16071	0.979
UST	-4.56	8	-1.17	0.122	1859	0.972	0.878	16070	0.979
LHX3	-4.56	8	-1.17	0.122	1860	0.972	0.878	16069	0.979
PACSIN3	-3.94	6	-1.16	0.122	1861	0.972	0.878	16068	0.979
PTPRE	-4.55	8	-1.16	0.122	1862	0.972	0.878	16067	0.979
EFNA4	-4.55	8	-1.16	0.122	1863	0.972	0.878	16066	0.979
FAM207A	-4.55	8	-1.16	0.122	1864	0.972	0.878	16065	0.979
SLC22A18AS	-4.55	8	-1.16	0.122	1865	0.972	0.878	16064	0.979
HMGCLL1	-4.55	8	-1.16	0.122	1866	0.972	0.878	16063	0.979
MARCKS	-4.55	8	-1.16	0.122	1867	0.972	0.878	16062	0.979
ATP6V1B2	-4.55	8	-1.16	0.122	1868	0.972	0.878	16061	0.979
FUT2	-4.54	8	-1.16	0.123	1869	0.972	0.877	16060	0.979
BPIFB3	-4.54	8	-1.16	0.123	1870	0.972	0.877	16059	0.979
ANAPC11	-4.54	8	-1.16	0.123	1871	0.972	0.877	16058	0.979
MAP6D1	-4.54	8	-1.16	0.123	1872	0.972	0.877	16057	0.979
FOS	-4.54	8	-1.16	0.123	1873	0.972	0.877	16056	0.979
PFDN5	-4.54	8	-1.16	0.123	1874	0.972	0.877	16055	0.979
EHD2	-4.53	8	-1.16	0.123	1875	0.972	0.877	16054	0.979
RNF8	-4.53	8	-1.16	0.123	1876	0.972	0.877	16053	0.979
NMNAT3	-4.53	8	-1.16	0.123	1877	0.972	0.877	16052	0.979
HMGN4	-4.53	8	-1.16	0.123	1878	0.972	0.877	16051	0.979
DMRTA2	-4.53	8	-1.16	0.123	1879	0.972	0.877	16050	0.979
C15orf39	-4.53	8	-1.16	0.123	1880	0.972	0.877	16049	0.979
TREM1	-4.53	8	-1.16	0.123	1881	0.972	0.877	16048	0.979
EIF1AD	-4.52	8	-1.16	0.124	1882	0.972	0.876	16047	0.979
ZFX	-4.52	8	-1.16	0.124	1883	0.972	0.876	16046	0.979
SPRYD3	-4.52	8	-1.16	0.124	1884	0.972	0.876	16045	0.979
KTI12	-4.52	8	-1.16	0.124	1885	0.972	0.876	16044	0.979
FAM120AOS	-4.52	8	-1.16	0.124	1886	0.972	0.876	16043	0.979
FIZ1	-4.52	8	-1.15	0.124	1887	0.972	0.876	16042	0.979
CYP2J2	-4.51	8	-1.15	0.124	1888	0.972	0.876	16041	0.979
MRPS11	-4.51	8	-1.15	0.124	1889	0.972	0.876	16040	0.979
BPIFA3	-4.51	8	-1.15	0.124	1890	0.972	0.876	16039	0.979
PEX16	-4.51	8	-1.15	0.124	1891	0.972	0.876	16038	0.979
TBX10	-4.5	8	-1.15	0.125	1892	0.972	0.875	16037	0.978
LRP10	-4.5	8	-1.15	0.125	1893	0.972	0.875	16036	0.978
PAPSS2	-4.5	8	-1.15	0.125	1894	0.972	0.875	16035	0.978
SERPINA11	-4.5	8	-1.15	0.125	1895	0.972	0.875	16034	0.978
DNAAF3	-4.5	8	-1.15	0.125	1896	0.972	0.875	16033	0.978
B4GALT7	-4.5	8	-1.15	0.125	1897	0.972	0.875	16032	0.978
RHBDL3	-4.5	8	-1.15	0.125	1898	0.972	0.875	16031	0.978
MUC20	-4.5	8	-1.15	0.125	1899	0.972	0.875	16030	0.978
TSHZ3	-4.5	8	-1.15	0.125	1900	0.972	0.875	16029	0.978
EMC3	-4.49	8	-1.15	0.125	1901	0.972	0.875	16028	0.978
PSMA2	-4.49	8	-1.15	0.125	1902	0.972	0.875	16027	0.978
GRID1	-4.49	8	-1.15	0.126	1903	0.972	0.874	16026	0.978
IFNL1	-4.49	8	-1.15	0.126	1904	0.972	0.874	16025	0.978
ATP5C1	-4.48	8	-1.15	0.126	1905	0.972	0.874	16024	0.978
DNASE2	-4.48	8	-1.15	0.126	1906	0.972	0.874	16023	0.978
CACUL1	-4.48	8	-1.15	0.126	1907	0.972	0.874	16022	0.978
OR10G2	-4.48	8	-1.14	0.126	1908	0.972	0.874	16021	0.978
TEX22	-4.48	8	-1.14	0.126	1909	0.972	0.874	16020	0.978
BST2	-4.48	8	-1.14	0.126	1910	0.972	0.874	16019	0.978
GABBR1	-4.48	8	-1.14	0.126	1911	0.972	0.874	16018	0.978
TMEM120B	-4.48	8	-1.14	0.126	1912	0.972	0.874	16017	0.978
SYNPO2L	-4.48	8	-1.14	0.126	1913	0.972	0.874	16016	0.978
ADAMTS4	-4.48	8	-1.14	0.126	1914	0.972	0.874	16015	0.978
LAMB3	-4.47	8	-1.14	0.126	1915	0.972	0.874	16014	0.978
TMEM212	-4.47	8	-1.14	0.126	1916	0.972	0.874	16013	0.978
MAP2K7	-4.47	8	-1.14	0.127	1917	0.972	0.873	16012	0.978
NYAP1	-4.47	8	-1.14	0.127	1918	0.972	0.873	16011	0.978
MRPL54	-4.46	8	-1.14	0.127	1919	0.972	0.873	16010	0.978
CSRNP1	-4.46	8	-1.14	0.127	1920	0.972	0.873	16009	0.978
HES6	-4.46	8	-1.14	0.127	1921	0.972	0.873	16008	0.978
BRIX1	-4.46	8	-1.14	0.127	1922	0.972	0.873	16007	0.978
AHDC1	-4.46	8	-1.14	0.127	1923	0.972	0.873	16006	0.978
NEDD8	-3.86	6	-1.14	0.127	1924	0.972	0.873	16005	0.978
LIPE	-4.46	8	-1.14	0.127	1925	0.972	0.873	16004	0.978
UBE2O	-4.46	8	-1.14	0.127	1926	0.972	0.873	16003	0.978
DONSON	-4.46	8	-1.14	0.127	1927	0.972	0.873	16002	0.978
C9orf9	-4.45	8	-1.14	0.128	1928	0.972	0.872	16001	0.978
CCR4	-4.45	8	-1.14	0.128	1929	0.972	0.872	16000	0.978
AQP6	-4.45	8	-1.14	0.128	1930	0.972	0.872	15999	0.977
LHPP	-4.45	8	-1.14	0.128	1931	0.972	0.872	15998	0.977
THG1L	-4.45	8	-1.14	0.128	1932	0.972	0.872	15997	0.977
C1QL4	-4.45	8	-1.14	0.128	1933	0.972	0.872	15996	0.977
ATP13A4	-4.45	8	-1.14	0.128	1934	0.972	0.872	15995	0.977
ZBTB11	-4.45	8	-1.14	0.128	1935	0.972	0.872	15994	0.977
MOCS3	-4.44	8	-1.14	0.128	1936	0.972	0.872	15993	0.977
NTNG2	-4.44	8	-1.14	0.128	1937	0.972	0.872	15992	0.977
PSMD13	-4.44	8	-1.14	0.128	1938	0.972	0.872	15991	0.977
TSNAX	-4.44	8	-1.13	0.128	1939	0.972	0.872	15990	0.977
NANOS3	-4.44	8	-1.13	0.128	1940	0.972	0.872	15989	0.977
ZBTB41	-4.44	8	-1.13	0.128	1941	0.972	0.872	15988	0.977
TREX2	-4.44	8	-1.13	0.129	1942	0.972	0.871	15987	0.977
ZNF155	-4.43	8	-1.13	0.129	1943	0.972	0.871	15986	0.977
ARRDC5	-4.43	8	-1.13	0.129	1944	0.972	0.871	15985	0.977
PCNXL2	-4.43	8	-1.13	0.129	1945	0.972	0.871	15984	0.977
GJA8	-4.43	8	-1.13	0.129	1946	0.972	0.871	15983	0.977
ATP5D	-4.42	8	-1.13	0.129	1947	0.972	0.871	15982	0.977
HMGCR	-4.42	8	-1.13	0.129	1948	0.972	0.871	15981	0.977
CTH	-4.42	8	-1.13	0.129	1949	0.972	0.871	15980	0.977
SNX29	-4.42	8	-1.13	0.129	1950	0.972	0.871	15979	0.977
KIR2DL4	-4.42	8	-1.13	0.13	1951	0.972	0.87	15978	0.977
DDX11	-4.42	8	-1.13	0.13	1952	0.972	0.87	15977	0.977
FAM150B	-4.41	8	-1.13	0.13	1953	0.972	0.87	15976	0.977
OVOL1	-4.41	8	-1.13	0.13	1954	0.972	0.87	15975	0.977
RAB10	-4.41	8	-1.13	0.13	1955	0.972	0.87	15974	0.976
FCAMR	-4.41	8	-1.13	0.13	1956	0.972	0.87	15973	0.976
ZFP57	-4.41	8	-1.13	0.13	1957	0.972	0.87	15972	0.976
ASTE1	-4.41	8	-1.13	0.13	1958	0.972	0.87	15971	0.976
PAPL	-4.41	8	-1.13	0.13	1959	0.972	0.87	15970	0.976
UBE2V2	-4.41	8	-1.13	0.13	1960	0.972	0.87	15969	0.976
OAZ3	-4.41	8	-1.13	0.13	1961	0.972	0.87	15968	0.976
C15orf52	-4.4	8	-1.12	0.13	1962	0.972	0.87	15967	0.976
ZNHIT1	-4.4	8	-1.12	0.131	1963	0.972	0.869	15966	0.976
E2F3	-4.4	8	-1.12	0.131	1964	0.972	0.869	15965	0.976
CALR3	-4.4	8	-1.12	0.131	1965	0.972	0.869	15964	0.976
MED29	-4.4	8	-1.12	0.131	1966	0.972	0.869	15963	0.976
ISYNA1	-4.4	8	-1.12	0.131	1967	0.972	0.869	15962	0.976
MAT1A	-4.39	8	-1.12	0.131	1968	0.972	0.869	15961	0.976
SH3GLB1	-4.39	8	-1.12	0.131	1969	0.972	0.869	15960	0.976
BACE1	-4.38	8	-1.12	0.132	1970	0.972	0.868	15959	0.976
CEACAM16	-4.38	8	-1.12	0.132	1971	0.972	0.868	15958	0.976
WNK1	-4.38	8	-1.12	0.132	1972	0.972	0.868	15957	0.976
DRD5	-4.38	8	-1.12	0.132	1973	0.972	0.868	15956	0.976
LRRC8E	-4.38	8	-1.12	0.132	1974	0.972	0.868	15955	0.976
INHA	-4.38	8	-1.12	0.132	1975	0.972	0.868	15954	0.976
NANOS1	-4.38	8	-1.12	0.132	1976	0.972	0.868	15953	0.976
HAPLN2	-4.38	8	-1.12	0.132	1977	0.972	0.868	15952	0.976
SH2B3	-4.38	8	-1.12	0.132	1978	0.972	0.868	15951	0.976
C2orf50	-4.38	8	-1.12	0.132	1979	0.972	0.868	15950	0.976
PPP2CA	-4.38	8	-1.12	0.132	1980	0.972	0.868	15949	0.976
MDK	-4.38	8	-1.12	0.132	1981	0.972	0.868	15948	0.976
SHCBP1L	-4.37	8	-1.12	0.132	1982	0.972	0.868	15947	0.976
LRPPRC	-4.37	8	-1.12	0.132	1983	0.972	0.868	15946	0.976
ELK3	-4.37	8	-1.12	0.132	1984	0.972	0.868	15945	0.976
RSPH6A	-4.37	8	-1.12	0.132	1985	0.972	0.868	15944	0.976
FRAT2	-4.37	8	-1.12	0.132	1986	0.972	0.868	15943	0.976
TRMT1L	-4.37	8	-1.12	0.132	1987	0.972	0.868	15942	0.976
TNRC18	-4.37	8	-1.11	0.133	1988	0.972	0.867	15941	0.976
FASTKD2	-4.37	8	-1.11	0.133	1989	0.972	0.867	15940	0.976
RTCA	-4.36	8	-1.11	0.133	1990	0.972	0.867	15939	0.976
RAB26	-4.36	8	-1.11	0.133	1991	0.972	0.867	15938	0.976
HTR3A	-4.36	8	-1.11	0.133	1992	0.972	0.867	15937	0.975
SOCS1	-4.36	8	-1.11	0.133	1993	0.972	0.867	15936	0.975
PIM3	-4.36	8	-1.11	0.133	1994	0.972	0.867	15935	0.975
RALGPS1	-4.36	8	-1.11	0.133	1995	0.972	0.867	15934	0.975
PPP2R2A	-4.36	8	-1.11	0.133	1996	0.972	0.867	15933	0.975
TMEM40	-4.36	8	-1.11	0.133	1997	0.972	0.867	15932	0.975
LYPLAL1	-4.36	8	-1.11	0.133	1998	0.972	0.867	15931	0.975
LPCAT3	-3.77	6	-1.11	0.133	1999	0.972	0.867	15930	0.975
[truncated: 15,929 more rows]

## Sheet: Supplementary File 1e
GENE	sumZ	numObs	normZ	pval_synth	rank_synth	fdr_synth	pval_supp	rank_supp	fdr_supp
POLB	-38.74	8	-10.41	1.07e-25	1	1.92e-21	1	17929	1
SCAP	-25.96	8	-6.94	2.01e-12	2	1.81e-08	1	17928	1
XRCC1	-24.16	8	-6.45	5.64e-11	3	3.37e-07	1	17927	1
EXO1	-20.67	8	-5.5	1.9e-08	4	8.52e-05	1	17926	1
BYSL	-19.05	8	-5.06	2.12e-07	5	0.000759	1	17925	1
LIG1	-18.59	8	-4.93	4.07e-07	6	0.00122	1	17924	1
HSD17B3	-17.51	8	-4.64	1.75e-06	7	0.00449	1	17923	1
MYL2	-15.91	8	-4.2	1.31e-05	8	0.0293	1	17922	1
POLE3	-15.22	8	-4.02	2.95e-05	9	0.0587	1	17921	1
GLRA3	-12.75	6	-3.88	5.24e-05	10	0.0864	1	17920	1
SP1	-14.71	8	-3.88	5.3e-05	11	0.0864	1	17919	1
SOD1	-14.44	8	-3.8	7.15e-05	12	0.107	1	17918	1
NUS1	-14.12	8	-3.72	0.000101	13	0.14	1	17917	1
ARNT2	-13.92	8	-3.66	0.000126	14	0.161	1	17916	1
DALRD3	-13.61	8	-3.58	0.000172	15	0.206	1	17915	1
ADCY9	-13.41	8	-3.52	0.000214	16	0.225	1	17914	1
SLC45A1	-13.34	8	-3.5	0.000229	17	0.225	1	17913	1
COASY	-13.31	8	-3.5	0.000237	18	0.225	1	17912	1
POLE4	-13.27	8	-3.49	0.000245	19	0.225	1	17911	1
FRMD1	-13.25	8	-3.48	0.000251	20	0.225	1	17910	1
KIAA1462	-13.14	8	-3.45	0.00028	21	0.239	1	17909	1
OVOL2	-12.97	8	-3.4	0.000331	22	0.264	1	17908	1
CYP4B1	-12.95	8	-3.4	0.000339	23	0.264	1	17907	1
SLC9A8	-12.81	8	-3.36	0.000389	24	0.291	1	17906	1
INO80B	-12.69	8	-3.33	0.000436	25	0.304	1	17905	1
PER1	-12.68	8	-3.33	0.00044	26	0.304	1	17904	1
MBTPS1	-12.63	8	-3.31	0.000463	27	0.307	1	17903	1
POLR2C	-12.57	8	-3.3	0.00049	28	0.314	1	17902	1
MBD2	-12.43	8	-3.26	0.000564	29	0.349	0.999	17901	1
SLC9A5	-12.32	8	-3.23	0.000624	30	0.364	0.999	17900	1
ALPPL2	-8.71	4	-3.23	0.000629	31	0.364	0.999	17899	1
TMEM132D	-12.27	8	-3.21	0.000658	32	0.369	0.999	17898	1
MAN1B1	-12.17	8	-3.19	0.000718	33	0.39	0.999	17897	1
FOXO3	-12.14	8	-3.18	0.000739	34	0.39	0.999	17896	1
AIFM2	-12.1	8	-3.17	0.000768	35	0.393	0.999	17895	1
IL27RA	-12.05	8	-3.15	0.000803	36	0.394	0.999	17894	1
ADCK1	-12.04	8	-3.15	0.000812	37	0.394	0.999	17893	1
MINPP1	-10.3	6	-3.11	0.000931	38	0.439	0.999	17892	1
PRIMA1	-11.82	8	-3.09	0.001	39	0.46	0.999	17891	1
SMIM14	-11.72	8	-3.06	0.00109	40	0.489	0.999	17890	1
CHPF	-11.69	8	-3.06	0.00112	41	0.489	0.999	17889	1
ALDH1A1	-11.64	8	-3.04	0.00117	42	0.497	0.999	17888	1
NOS1AP	-11.62	8	-3.04	0.00119	43	0.497	0.999	17887	1
SPON2	-11.54	8	-3.02	0.00128	44	0.508	0.999	17886	1
ZRANB3	-11.52	8	-3.01	0.00131	45	0.508	0.999	17885	1
BSCL2	-11.44	8	-2.99	0.00141	46	0.508	0.999	17884	1
UBE3B	-11.43	8	-2.98	0.00142	47	0.508	0.999	17883	1
FKBP11	-11.42	8	-2.98	0.00143	48	0.508	0.999	17882	1
RNLS	-11.42	8	-2.98	0.00144	49	0.508	0.999	17881	1
LEO1	-11.41	8	-2.98	0.00144	50	0.508	0.999	17880	1
VMO1	-11.4	8	-2.98	0.00145	51	0.508	0.999	17879	1
C1orf229	-11.38	8	-2.97	0.00148	52	0.508	0.999	17878	1
CCDC64B	-11.37	8	-2.97	0.0015	53	0.508	0.998	17877	1
MGEA5	-11.32	8	-2.96	0.00156	54	0.512	0.998	17876	1
MESDC2	-11.29	8	-2.95	0.00161	55	0.512	0.998	17875	1
SPESP1	-11.25	8	-2.94	0.00167	56	0.512	0.998	17874	1
CTBP1	-11.24	8	-2.93	0.00167	57	0.512	0.998	17873	1
PSMD3	-11.22	8	-2.93	0.00171	58	0.512	0.998	17872	1
KRT8	-5.61	2	-2.93	0.00171	59	0.512	0.998	17871	1
CDCA3	-11.22	8	-2.93	0.00171	60	0.512	0.998	17870	1
LPAR3	-11.15	8	-2.91	0.00181	61	0.518	0.998	17869	1
YJEFN3	-11.15	8	-2.91	0.00182	62	0.518	0.998	17868	1
POLR1D	-11.13	8	-2.9	0.00184	63	0.518	0.998	17867	1
EVA1A	-11.13	8	-2.9	0.00185	64	0.518	0.998	17866	1
ZNF467	-11.11	8	-2.9	0.00188	65	0.518	0.998	17865	1
NAA25	-11.08	8	-2.89	0.00193	66	0.52	0.998	17864	1
SP8	-11.07	8	-2.89	0.00195	67	0.52	0.998	17863	1
TRIM7	-11.01	8	-2.87	0.00205	68	0.52	0.998	17862	1
CLUAP1	-11.01	8	-2.87	0.00205	69	0.52	0.998	17861	1
GALR2	-10.99	8	-2.87	0.00208	70	0.52	0.998	17860	1
GPA33	-10.95	8	-2.85	0.00216	71	0.52	0.998	17859	1
RFT1	-10.94	8	-2.85	0.00217	72	0.52	0.998	17858	1
TRUB1	-9.47	6	-2.85	0.00219	73	0.52	0.998	17857	1
IGBP1	-10.93	8	-2.85	0.0022	74	0.52	0.998	17856	1
BAIAP2L2	-10.91	8	-2.84	0.00223	75	0.52	0.998	17855	1
ZXDA	-7.71	4	-2.84	0.00225	76	0.52	0.998	17854	1
TOPORS	-9.43	6	-2.84	0.00227	77	0.52	0.998	17853	1
IRF9	-10.85	8	-2.83	0.00235	78	0.52	0.998	17852	1
WBP1	-10.83	8	-2.82	0.00238	79	0.52	0.998	17851	1
PCCB	-10.83	8	-2.82	0.00239	80	0.52	0.998	17850	1
RAB15	-10.82	8	-2.82	0.00241	81	0.52	0.998	17849	1
TM9SF4	-10.81	8	-2.82	0.00243	82	0.52	0.998	17848	1
CHAF1A	-10.81	8	-2.82	0.00243	83	0.52	0.998	17847	1
ZNF619	-10.81	8	-2.82	0.00244	84	0.52	0.998	17846	1
PDZD2	-10.76	8	-2.8	0.00252	85	0.53	0.997	17845	1
SRMS	-10.74	8	-2.8	0.00257	86	0.53	0.997	17844	1
RAB28	-10.74	8	-2.8	0.00258	87	0.53	0.997	17843	1
C12orf45	-10.73	8	-2.79	0.0026	88	0.53	0.997	17842	1
RABIF	-10.69	8	-2.78	0.00269	89	0.53	0.997	17841	1
GTF3C2	-10.69	8	-2.78	0.00269	90	0.53	0.997	17840	1
BCL2L12	-10.67	8	-2.78	0.00274	91	0.53	0.997	17839	1
SPECC1	-10.66	8	-2.78	0.00274	92	0.53	0.997	17838	1
JMJD7	-10.66	8	-2.78	0.00275	93	0.53	0.997	17837	1
CPLX3	-10.63	8	-2.77	0.00283	94	0.531	0.997	17836	1
ITFG2	-10.62	8	-2.77	0.00284	95	0.531	0.997	17835	1
NAP1L2	-10.61	8	-2.76	0.00288	96	0.531	0.997	17834	1
LAG3	-10.61	8	-2.76	0.00288	97	0.531	0.997	17833	1
ZNF600	-10.59	8	-2.76	0.00291	98	0.531	0.997	17832	1
NDUFA8	-10.58	8	-2.75	0.00293	99	0.531	0.997	17831	1
FAM46A	-10.53	8	-2.74	0.00307	100	0.545	0.997	17830	1
PAX9	-10.52	8	-2.74	0.0031	101	0.545	0.997	17829	1
LCN9	-10.49	8	-2.73	0.00317	102	0.545	0.997	17828	1
PPP1R36	-10.48	8	-2.73	0.0032	103	0.545	0.997	17827	1
CD248	-10.46	8	-2.72	0.00325	104	0.545	0.997	17826	1
ITIH1	-10.46	8	-2.72	0.00325	105	0.545	0.997	17825	1
LDB1	-10.43	8	-2.71	0.00334	106	0.545	0.997	17824	1
SLC9A4	-10.42	8	-2.71	0.00337	107	0.545	0.997	17823	1
ZNF780A	-7.35	4	-2.7	0.00342	108	0.545	0.997	17822	1
RIN3	-10.39	8	-2.7	0.00344	109	0.545	0.997	17821	1
CITED2	-10.39	8	-2.7	0.00345	110	0.545	0.997	17820	1
ZNF131	-10.38	8	-2.7	0.00346	111	0.545	0.997	17819	1
DOLK	-10.37	8	-2.7	0.00349	112	0.545	0.997	17818	1
HOXB5	-10.36	8	-2.69	0.00353	113	0.545	0.996	17817	1
D2HGDH	-10.36	8	-2.69	0.00354	114	0.545	0.996	17816	1
HTR6	-10.36	8	-2.69	0.00354	115	0.545	0.996	17815	1
PIM2	-10.35	8	-2.69	0.00356	116	0.545	0.996	17814	1
C6orf47	-10.33	8	-2.69	0.00362	117	0.545	0.996	17813	1
MRPL2	-10.33	8	-2.68	0.00363	118	0.545	0.996	17812	1
CDK5R2	-10.33	8	-2.68	0.00363	119	0.545	0.996	17811	1
HUNK	-10.32	8	-2.68	0.00365	120	0.545	0.996	17810	1
RGS9BP	-10.24	8	-2.66	0.00389	121	0.572	0.996	17809	1
GAS2L1	-10.24	8	-2.66	0.0039	122	0.572	0.996	17808	1
B3GALT4	-10.21	8	-2.65	0.00398	123	0.572	0.996	17807	1
INPP5A	-10.21	8	-2.65	0.00399	124	0.572	0.996	17806	1
POLD2	-10.2	8	-2.65	0.00401	125	0.572	0.996	17805	1
PTPN6	-10.19	8	-2.65	0.00406	126	0.572	0.996	17804	1
DCTN4	-10.18	8	-2.65	0.00407	127	0.572	0.996	17803	1
CACNA1E	-10.17	8	-2.64	0.00412	128	0.572	0.996	17802	1
FAM172A	-10.16	8	-2.64	0.00415	129	0.572	0.996	17801	1
PPM1F	-10.16	8	-2.64	0.00415	130	0.572	0.996	17800	1
TLR10	-10.14	8	-2.63	0.00422	131	0.572	0.996	17799	1
FEM1A	-10.14	8	-2.63	0.00422	132	0.572	0.996	17798	1
IGSF9B	-10.12	8	-2.63	0.00427	133	0.572	0.996	17797	1
RAB5C	-10.12	8	-2.63	0.00428	134	0.572	0.996	17796	1
PRKAR2A	-10.11	8	-2.62	0.00434	135	0.572	0.996	17795	1
CENPA	-10.1	8	-2.62	0.00434	136	0.572	0.996	17794	1
EXOC3L1	-10.08	8	-2.62	0.00442	137	0.578	0.996	17793	1
MZT1	-7.11	4	-2.61	0.00451	138	0.58	0.995	17792	1
PSME3	-10.03	8	-2.6	0.00461	139	0.58	0.995	17791	1
PPARD	-10.02	8	-2.6	0.00463	140	0.58	0.995	17790	1
VPS36	-10.02	8	-2.6	0.00465	141	0.58	0.995	17789	1
DPY19L4	-10	8	-2.59	0.00473	142	0.58	0.995	17788	1
TIMELESS	-9.98	8	-2.59	0.00479	143	0.58	0.995	17787	1
GH1	-9.98	8	-2.59	0.0048	144	0.58	0.995	17786	1
DYNC1LI2	-9.97	8	-2.59	0.00482	145	0.58	0.995	17785	1
CALHM1	-9.97	8	-2.59	0.00485	146	0.58	0.995	17784	1
TNPO3	-9.32	7	-2.59	0.00486	147	0.58	0.995	17783	1
HOXC12	-9.96	8	-2.59	0.00487	148	0.58	0.995	17782	1
HIST1H4F	-9.96	8	-2.58	0.00487	149	0.58	0.995	17781	1
IFIT3	-9.94	8	-2.58	0.00496	150	0.58	0.995	17780	1
AMPD3	-9.93	8	-2.58	0.00497	151	0.58	0.995	17779	1
STRA13	-9.93	8	-2.58	0.00499	152	0.58	0.995	17778	1
SCNN1G	-9.92	8	-2.58	0.00501	153	0.58	0.995	17777	1
HECW2	-9.92	8	-2.57	0.00503	154	0.58	0.995	17776	1
ZZEF1	-9.92	8	-2.57	0.00504	155	0.58	0.995	17775	1
EXOSC5	-9.92	8	-2.57	0.00504	156	0.58	0.995	17774	1
FZD8	-9.9	8	-2.57	0.00511	157	0.584	0.995	17773	1
SHC2	-9.88	8	-2.56	0.00517	158	0.586	0.995	17772	1
BLCAP	-9.87	8	-2.56	0.00524	159	0.59	0.995	17771	1
PRICKLE2	-9.85	8	-2.56	0.0053	160	0.59	0.995	17770	1
FBXL7	-9.85	8	-2.56	0.0053	161	0.59	0.995	17769	1
COX5B	-9.84	8	-2.55	0.00533	162	0.59	0.995	17768	1
CCDC149	-9.82	8	-2.55	0.00543	163	0.595	0.995	17767	1
TAGAP	-9.82	8	-2.55	0.00544	164	0.595	0.995	17766	1
RESP18	-8.49	6	-2.54	0.00552	165	0.599	0.994	17765	1
DNAJC7	-9.78	8	-2.53	0.00562	166	0.607	0.994	17764	1
AP3S2	-8.46	6	-2.53	0.00567	167	0.608	0.994	17763	1
PNKP	-9.75	8	-2.53	0.00572	168	0.608	0.994	17762	1
PFKP	-9.75	8	-2.53	0.00573	169	0.608	0.994	17761	1
C8orf82	-9.73	8	-2.52	0.00584	170	0.609	0.994	17760	1
OR10P1	-9.73	8	-2.52	0.00584	171	0.609	0.994	17759	1
DLX4	-9.71	8	-2.52	0.0059	172	0.609	0.994	17758	1
SV2B	-9.71	8	-2.52	0.00592	173	0.609	0.994	17757	1
TGFB1	-9.71	8	-2.52	0.00593	174	0.609	0.994	17756	1
ZFAND2B	-9.7	8	-2.51	0.00597	175	0.609	0.994	17755	1
SLC30A8	-9.7	8	-2.51	0.00598	176	0.609	0.994	17754	1
DEFB121	-8.37	6	-2.51	0.0061	177	0.613	0.994	17753	1
SEC11C	-9.66	8	-2.5	0.00616	178	0.613	0.994	17752	1
IPPK	-9.65	8	-2.5	0.00619	179	0.613	0.994	17751	1
TBX19	-9.65	8	-2.5	0.0062	180	0.613	0.994	17750	1
TIFAB	-9.63	8	-2.5	0.00629	181	0.613	0.994	17749	1
ARF4	-8.33	6	-2.49	0.00635	182	0.613	0.994	17748	1
METTL25	-8.99	7	-2.49	0.00638	183	0.613	0.994	17747	1
NFASC	-9.61	8	-2.49	0.00641	184	0.613	0.994	17746	1
CDK9	-9.59	8	-2.48	0.0065	185	0.613	0.994	17745	1
C16orf72	-8.3	6	-2.48	0.00651	186	0.613	0.993	17744	1
METTL21A	-9.59	8	-2.48	0.00651	187	0.613	0.993	17743	1
SERPINF2	-9.58	8	-2.48	0.00653	188	0.613	0.993	17742	1
CD101	-9.58	8	-2.48	0.00656	189	0.613	0.993	17741	1
RNF168	-9.57	8	-2.48	0.00658	190	0.613	0.993	17740	1
TINAG	-9.57	8	-2.48	0.00659	191	0.613	0.993	17739	1
GPR27	-9.57	8	-2.48	0.0066	192	0.613	0.993	17738	1
SMARCD2	-9.56	8	-2.48	0.00664	193	0.613	0.993	17737	1
ALPK3	-9.55	8	-2.47	0.00667	194	0.613	0.993	17736	1
EPB41L4B	-9.55	8	-2.47	0.00671	195	0.613	0.993	17735	1
IRX1	-9.54	8	-2.47	0.00673	196	0.613	0.993	17734	1
OSGEP	-8.25	6	-2.47	0.00682	197	0.613	0.993	17733	1
NUDT17	-9.52	8	-2.46	0.00686	198	0.613	0.993	17732	1
EPM2AIP1	-9.51	8	-2.46	0.00688	199	0.613	0.993	17731	1
ARAF	-9.51	8	-2.46	0.0069	200	0.613	0.993	17730	1
C14orf166	-9.51	8	-2.46	0.00691	201	0.613	0.993	17729	1
LMTK2	-9.49	8	-2.46	0.007	202	0.613	0.993	17728	1
SGK1	-8.2	6	-2.45	0.00711	203	0.613	0.993	17727	1
ZNF276	-9.46	8	-2.45	0.00715	204	0.613	0.993	17726	1
ANKRD13B	-9.45	8	-2.45	0.00723	205	0.613	0.993	17725	1
CNTNAP1	-9.45	8	-2.45	0.00724	206	0.613	0.993	17724	1
SNX7	-9.45	8	-2.45	0.00724	207	0.613	0.993	17723	1
POPDC2	-9.44	8	-2.44	0.00725	208	0.613	0.993	17722	1
RPF1	-9.44	8	-2.44	0.00728	209	0.613	0.993	17721	1
AMOTL1	-9.43	8	-2.44	0.00733	210	0.613	0.993	17720	1
ZNF414	-9.42	8	-2.44	0.00739	211	0.613	0.993	17719	1
SGPL1	-9.42	8	-2.44	0.0074	212	0.613	0.993	17718	1
ZCCHC13	-9.42	8	-2.44	0.0074	213	0.613	0.993	17717	1
MXI1	-9.41	8	-2.44	0.00741	214	0.613	0.993	17716	1
HYAL1	-9.41	8	-2.44	0.00741	215	0.613	0.993	17715	1
KCNH3	-9.41	8	-2.43	0.00746	216	0.613	0.993	17714	1
KMT2D	-9.4	8	-2.43	0.00747	217	0.613	0.993	17713	1
S100A3	-9.4	8	-2.43	0.0075	218	0.613	0.992	17712	1
CWF19L2	-9.4	8	-2.43	0.00751	219	0.613	0.992	17711	1
PAPD7	-9.39	8	-2.43	0.00753	220	0.613	0.992	17710	1
NCOR2	-9.36	8	-2.42	0.00772	221	0.623	0.992	17709	1
NCLN	-9.35	8	-2.42	0.00775	222	0.623	0.992	17708	1
CCDC61	-9.35	8	-2.42	0.00779	223	0.623	0.992	17707	1
ERAP2	-9.34	8	-2.42	0.00785	224	0.623	0.992	17706	1
RPS5	-9.33	8	-2.41	0.00791	225	0.623	0.992	17705	1
PCYOX1L	-9.33	8	-2.41	0.00792	226	0.623	0.992	17704	1
TMEM150A	-9.32	8	-2.41	0.00798	227	0.623	0.992	17703	1
ERICH1	-9.31	8	-2.41	0.00799	228	0.623	0.992	17702	1
EFEMP1	-9.3	8	-2.41	0.00805	229	0.623	0.992	17701	1
GINS3	-9.29	8	-2.4	0.00812	230	0.623	0.992	17700	1
WHSC1L1	-9.29	8	-2.4	0.00813	231	0.623	0.992	17699	1
CEBPA	-9.29	8	-2.4	0.00816	232	0.623	0.992	17698	1
KRT32	-9.28	8	-2.4	0.00817	233	0.623	0.992	17697	1
FAAH	-9.28	8	-2.4	0.0082	234	0.623	0.992	17696	1
CHD4	-9.28	8	-2.4	0.00822	235	0.623	0.992	17695	1
ANAPC5	-9.27	8	-2.4	0.00824	236	0.623	0.992	17694	1
DNAJC4	-9.27	8	-2.4	0.00826	237	0.623	0.992	17693	1
PSMB1	-9.27	8	-2.4	0.00827	238	0.623	0.992	17692	1
RABEP2	-9.25	8	-2.39	0.00838	239	0.624	0.992	17691	1
CCS	-9.25	8	-2.39	0.0084	240	0.624	0.992	17690	1
FOXN1	-9.25	8	-2.39	0.00841	241	0.624	0.992	17689	1
SUSD1	-9.24	8	-2.39	0.00842	242	0.624	0.992	17688	1
C6orf120	-9.23	8	-2.39	0.00849	243	0.626	0.992	17687	1
FBXO10	-9.22	8	-2.38	0.00859	244	0.63	0.991	17686	1
HNRNPH1	-9.21	8	-2.38	0.00862	245	0.63	0.991	17685	1
PCDHA5	-9.21	8	-2.38	0.00866	246	0.63	0.991	17684	1
ENDOV	-9.2	8	-2.38	0.00869	247	0.63	0.991	17683	1
ALPP	-6.5	4	-2.38	0.00872	248	0.63	0.991	17682	1
TRIM28	-9.18	8	-2.37	0.00881	249	0.635	0.991	17681	1
ZRSR1	-4.58	2	-2.37	0.0089	250	0.639	0.991	17680	1
ZNF671	-9.16	8	-2.37	0.00894	251	0.639	0.991	17679	1
TMEM121	-9.15	8	-2.36	0.00904	252	0.641	0.991	17678	1
DLX5	-9.15	8	-2.36	0.00905	253	0.641	0.991	17677	1
ATP5B	-9.12	8	-2.36	0.00921	254	0.647	0.991	17676	1
RAB40B	-9.11	8	-2.35	0.00929	255	0.647	0.991	17675	1
PSMB7	-9.11	8	-2.35	0.00931	256	0.647	0.991	17674	1
C21orf88	-9.11	8	-2.35	0.00931	257	0.647	0.991	17673	1
KAZALD1	-9.1	8	-2.35	0.00934	258	0.647	0.991	17672	1
MON2	-9.1	8	-2.35	0.00934	259	0.647	0.991	17671	1
CCT7	-9.09	8	-2.35	0.0094	260	0.648	0.991	17670	1
MREG	-9.08	8	-2.35	0.0095	261	0.653	0.99	17669	1
PPAP2B	-9.06	8	-2.34	0.00961	262	0.655	0.99	17668	1
RIPK1	-9.06	8	-2.34	0.00962	263	0.655	0.99	17667	1
ZNF526	-9.06	8	-2.34	0.00964	264	0.655	0.99	17666	1
SF3A2	-7.16	5	-2.34	0.00967	265	0.655	0.99	17665	1
ZNF490	-9.05	8	-2.34	0.00972	266	0.655	0.99	17664	1
FMNL1	-9.03	8	-2.33	0.00981	267	0.656	0.99	17663	1
DNAJC15	-9.03	8	-2.33	0.00986	268	0.656	0.99	17662	1
GLRA1	-9.03	8	-2.33	0.00986	269	0.656	0.99	17661	1
KIN	-9.02	8	-2.33	0.00991	270	0.656	0.99	17660	1
DACH1	-9.02	8	-2.33	0.00994	271	0.656	0.99	17659	1
KIFC3	-9.01	8	-2.33	0.00998	272	0.656	0.99	17658	1
HGS	-9.01	8	-2.33	0.01	273	0.656	0.99	17657	1
CCDC22	-8.99	8	-2.32	0.0102	274	0.665	0.99	17656	1
ACVRL1	-8.97	8	-2.32	0.0103	275	0.669	0.99	17655	1
ASCL2	-8.96	8	-2.31	0.0104	276	0.669	0.99	17654	1
BCMO1	-8.95	8	-2.31	0.0104	277	0.669	0.99	17653	1
THOC6	-8.95	8	-2.31	0.0105	278	0.669	0.99	17652	1
TSPO	-8.94	8	-2.31	0.0105	279	0.669	0.99	17651	1
OPRL1	-8.94	8	-2.31	0.0105	280	0.669	0.989	17650	1
PIGA	-8.93	8	-2.31	0.0106	281	0.669	0.989	17649	1
RNF113A	-8.93	8	-2.3	0.0106	282	0.669	0.989	17648	1
FEZF1	-8.93	8	-2.3	0.0106	283	0.669	0.989	17647	1
ARRB2	-8.93	8	-2.3	0.0106	284	0.669	0.989	17646	1
C21orf33	-8.92	8	-2.3	0.0106	285	0.669	0.989	17645	1
PRKRA	-8.9	8	-2.3	0.0108	286	0.675	0.989	17644	1
CXCL13	-8.9	8	-2.3	0.0108	287	0.675	0.989	17643	1
SREBF2	-8.89	8	-2.29	0.0109	288	0.679	0.989	17642	1
GLIS2	-8.88	8	-2.29	0.011	289	0.682	0.989	17641	1
C22orf43	-8.86	8	-2.29	0.0111	290	0.685	0.989	17640	1
C22orf42	-8.86	8	-2.29	0.0111	291	0.685	0.989	17639	1
SHE	-8.85	8	-2.28	0.0112	292	0.687	0.989	17638	1
BAP1	-8.85	8	-2.28	0.0112	293	0.688	0.989	17637	1
PRUNE2	-8.84	8	-2.28	0.0113	294	0.69	0.989	17636	1
SLC4A7	-8.83	8	-2.28	0.0114	295	0.693	0.989	17635	1
NAE1	-8.81	8	-2.27	0.0115	296	0.696	0.988	17634	1
GLP2R	-8.81	8	-2.27	0.0115	297	0.696	0.988	17633	1
MMAA	-8.8	8	-2.27	0.0116	298	0.697	0.988	17632	1
C19orf73	-8.8	8	-2.27	0.0116	299	0.697	0.988	17631	1
CEP152	-7.61	6	-2.27	0.0117	300	0.699	0.988	17630	1
WIPF3	-8.79	8	-2.27	0.0117	301	0.699	0.988	17629	1
FAM109A	-8.78	8	-2.26	0.0118	302	0.7	0.988	17628	1
LEPREL4	-8.77	8	-2.26	0.0119	303	0.701	0.988	17627	1
FAM9C	-8.77	8	-2.26	0.0119	304	0.701	0.988	17626	1
ZNF628	-8.76	8	-2.26	0.0119	305	0.701	0.988	17625	1
FAM161B	-8.75	8	-2.26	0.012	306	0.702	0.988	17624	1
LRRC20	-8.74	8	-2.25	0.0122	307	0.702	0.988	17623	1
POLR2I	-8.73	8	-2.25	0.0122	308	0.702	0.988	17622	1
ELMOD2	-8.73	8	-2.25	0.0122	309	0.702	0.988	17621	1
MSH5	-8.73	8	-2.25	0.0122	310	0.702	0.988	17620	1
KPNB1	-7.56	6	-2.25	0.0123	311	0.702	0.988	17619	1
DUOX1	-8.7	8	-2.24	0.0124	312	0.702	0.988	17618	1
B3GALNT1	-8.7	8	-2.24	0.0125	313	0.702	0.988	17617	1
BUB3	-8.14	7	-2.24	0.0125	314	0.702	0.988	17616	1
GCK	-8.7	8	-2.24	0.0125	315	0.702	0.987	17615	1
ASB1	-8.69	8	-2.24	0.0125	316	0.702	0.987	17614	1
FAM198B	-8.69	8	-2.24	0.0125	317	0.702	0.987	17613	1
CAV3	-8.69	8	-2.24	0.0126	318	0.702	0.987	17612	1
ZBP1	-8.69	8	-2.24	0.0126	319	0.702	0.987	17611	1
PROX2	-8.69	8	-2.24	0.0126	320	0.702	0.987	17610	1
RPA1	-8.69	8	-2.24	0.0126	321	0.702	0.987	17609	1
KLHDC10	-8.68	8	-2.24	0.0126	322	0.702	0.987	17608	1
HEATR1	-8.68	8	-2.24	0.0127	323	0.704	0.987	17607	1
C2ORF15	-8.67	8	-2.23	0.0127	324	0.705	0.987	17606	1
TAP2	-8.66	8	-2.23	0.0128	325	0.707	0.987	17605	1
CELSR2	-8.65	8	-2.23	0.0129	326	0.707	0.987	17604	1
DKC1	-8.65	8	-2.23	0.0129	327	0.707	0.987	17603	1
RFC2	-8.64	8	-2.23	0.013	328	0.707	0.987	17602	1
NFAT5	-8.64	8	-2.23	0.013	329	0.707	0.987	17601	1
DCAF4L1	-8.63	8	-2.22	0.0131	330	0.707	0.987	17600	1
GDAP1	-8.62	8	-2.22	0.0132	331	0.707	0.987	17599	1
KRT33B	-8.62	8	-2.22	0.0132	332	0.707	0.987	17598	1
DDOST	-8.61	8	-2.22	0.0133	333	0.707	0.987	17597	1
NGFR	-8.6	8	-2.22	0.0134	334	0.707	0.987	17596	1
COX4I2	-8.6	8	-2.22	0.0134	335	0.707	0.987	17595	1
CIAO1	-8.6	8	-2.21	0.0134	336	0.707	0.987	17594	1
DLK1	-8.59	8	-2.21	0.0134	337	0.707	0.987	17593	1
OGT	-8.59	8	-2.21	0.0135	338	0.707	0.987	17592	1
C14orf177	-8.59	8	-2.21	0.0135	339	0.707	0.987	17591	1
ALDH4A1	-8.59	8	-2.21	0.0135	340	0.707	0.987	17590	1
PCDH8	-8.59	8	-2.21	0.0135	341	0.707	0.987	17589	1
CD5L	-8.59	8	-2.21	0.0135	342	0.707	0.987	17588	1
FBXO3	-8.58	8	-2.21	0.0135	343	0.707	0.986	17587	1
ATP5A1	-8.57	8	-2.21	0.0136	344	0.71	0.986	17586	1
PIK3R3	-8.57	8	-2.21	0.0137	345	0.71	0.986	17585	1
SLC22A17	-7.42	6	-2.21	0.0137	346	0.71	0.986	17584	1
GMNC	-8.56	8	-2.2	0.0138	347	0.711	0.986	17583	1
CNPY3	-8.55	8	-2.2	0.0138	348	0.712	0.986	17582	1
FEN1	-7.4	6	-2.2	0.0139	349	0.715	0.986	17581	1
PYROXD1	-8.54	8	-2.2	0.014	350	0.715	0.986	17580	1
TAF5	-8.53	8	-2.2	0.0141	351	0.719	0.986	17579	1
RSPO4	-8.52	8	-2.19	0.0142	352	0.721	0.986	17578	1
ARHGEF16	-8.51	8	-2.19	0.0142	353	0.722	0.986	17577	1
RNF40	-8.51	8	-2.19	0.0143	354	0.722	0.986	17576	1
BTBD18	-8.5	8	-2.19	0.0143	355	0.723	0.986	17575	1
ZNF808	-8.49	8	-2.19	0.0144	356	0.726	0.986	17574	1
YBX3	-8.47	8	-2.18	0.0147	357	0.736	0.985	17573	1
JRKL	-8.46	8	-2.18	0.0148	358	0.739	0.985	17572	1
HOXB6	-8.44	8	-2.17	0.0149	359	0.745	0.985	17571	1
DPT	-8.44	8	-2.17	0.015	360	0.746	0.985	17570	1
UCMA	-8.42	8	-2.17	0.0151	361	0.748	0.985	17569	1
TSPYL4	-8.42	8	-2.17	0.0152	362	0.748	0.985	17568	1
MMAB	-8.41	8	-2.16	0.0152	363	0.748	0.985	17567	1
SRF	-8.41	8	-2.16	0.0152	364	0.748	0.985	17566	1
ING1	-8.41	8	-2.16	0.0153	365	0.748	0.985	17565	1
KIAA0895L	-8.41	8	-2.16	0.0153	366	0.748	0.985	17564	1
POLR1E	-8.4	8	-2.16	0.0153	367	0.748	0.985	17563	1
FAM161A	-8.4	8	-2.16	0.0154	368	0.748	0.985	17562	1
RAE1	-8.39	8	-2.16	0.0155	369	0.748	0.985	17561	1
DLGAP4	-8.39	8	-2.16	0.0155	370	0.748	0.984	17560	1
CNGA3	-8.39	8	-2.16	0.0155	371	0.748	0.984	17559	1
RPTOR	-8.38	8	-2.16	0.0155	372	0.748	0.984	17558	1
SLC3A1	-8.38	8	-2.16	0.0156	373	0.749	0.984	17557	1
SLCO4A1	-8.37	8	-2.15	0.0157	374	0.751	0.984	17556	1
RFC1	-8.37	8	-2.15	0.0157	375	0.751	0.984	17555	1
ST6GALNAC6	-8.35	8	-2.15	0.0159	376	0.757	0.984	17554	1
ZNF335	-8.33	8	-2.14	0.0161	377	0.764	0.984	17553	1
TOX	-8.33	8	-2.14	0.0161	378	0.764	0.984	17552	1
LEUTX	-8.32	8	-2.14	0.0162	379	0.764	0.984	17551	1
THEMIS	-8.32	8	-2.14	0.0162	380	0.764	0.984	17550	1
MAGEB3	-8.32	8	-2.14	0.0162	381	0.764	0.984	17549	1
STRBP	-8.31	8	-2.14	0.0163	382	0.764	0.984	17548	1
ZNF503	-8.3	8	-2.13	0.0164	383	0.768	0.984	17547	1
KRT12	-8.3	8	-2.13	0.0165	384	0.768	0.984	17546	1
DNAJB1	-8.29	8	-2.13	0.0165	385	0.768	0.983	17545	1
KIF26A	-8.29	8	-2.13	0.0165	386	0.768	0.983	17544	1
ADD2	-8.29	8	-2.13	0.0166	387	0.768	0.983	17543	1
TGM5	-7.16	6	-2.12	0.0168	388	0.778	0.983	17542	1
F7	-8.25	8	-2.12	0.017	389	0.783	0.983	17541	1
HSPB8	-8.24	8	-2.12	0.0171	390	0.786	0.983	17540	1
SCN11A	-8.24	8	-2.12	0.0172	391	0.787	0.983	17539	1
CLPS	-8.23	8	-2.12	0.0172	392	0.787	0.983	17538	1
KIAA0922	-8.23	8	-2.11	0.0173	393	0.787	0.983	17537	1
TRAM1L1	-8.22	8	-2.11	0.0173	394	0.787	0.983	17536	1
VSX2	-8.22	8	-2.11	0.0174	395	0.789	0.983	17535	1
OLFM1	-8.21	8	-2.11	0.0174	396	0.789	0.983	17534	1
ACSBG2	-8.21	8	-2.11	0.0175	397	0.79	0.983	17533	1
CHST13	-8.2	8	-2.11	0.0176	398	0.792	0.982	17532	1
ENY2	-8.2	8	-2.11	0.0176	399	0.792	0.982	17531	1
FAIM2	-8.19	8	-2.1	0.0177	400	0.792	0.982	17530	1
PNPLA2	-8.19	8	-2.1	0.0178	401	0.792	0.982	17529	1
RAD50	-7.09	6	-2.1	0.0178	402	0.792	0.982	17528	1
C10orf85	-8.18	8	-2.1	0.0178	403	0.792	0.982	17527	1
DDAH1	-8.18	8	-2.1	0.0179	404	0.792	0.982	17526	1
MANSC4	-8.17	8	-2.1	0.0179	405	0.792	0.982	17525	1
MLXIPL	-8.17	8	-2.1	0.018	406	0.793	0.982	17524	1
INTS10	-8.16	8	-2.1	0.018	407	0.795	0.982	17523	1
CALHM3	-8.16	8	-2.09	0.0181	408	0.795	0.982	17522	1
ZIC5	-8.15	8	-2.09	0.0181	409	0.795	0.982	17521	1
TMCC2	-8.14	8	-2.09	0.0183	410	0.795	0.982	17520	1
UPF1	-7.05	6	-2.09	0.0183	411	0.795	0.982	17519	1
RARS2	-8.14	8	-2.09	0.0183	412	0.795	0.982	17518	1
SMARCC2	-8.14	8	-2.09	0.0183	413	0.795	0.982	17517	1
PDGFRA	-8.13	8	-2.09	0.0184	414	0.795	0.982	17516	1
LRRK1	-8.13	8	-2.09	0.0184	415	0.795	0.982	17515	1
SFTPD	-8.13	8	-2.09	0.0184	416	0.795	0.982	17514	1
PIANP	-8.12	8	-2.08	0.0186	417	0.799	0.981	17513	1
CCDC47	-8.11	8	-2.08	0.0187	418	0.801	0.981	17512	1
CENPO	-8.11	8	-2.08	0.0187	419	0.802	0.981	17511	1
NDUFB9	-8.09	8	-2.08	0.0189	420	0.802	0.981	17510	1
SH2D5	-8.09	8	-2.08	0.0189	421	0.802	0.981	17509	1
ENOPH1	-8.09	8	-2.08	0.0189	422	0.802	0.981	17508	1
STK10	-8.09	8	-2.08	0.0189	423	0.802	0.981	17507	1
HGFAC	-8.09	8	-2.08	0.019	424	0.803	0.981	17506	1
ARRB1	-6.99	6	-2.07	0.0191	425	0.805	0.981	17505	1
SLC22A11	-8.07	8	-2.07	0.0191	426	0.805	0.981	17504	1
TAL2	-8.07	8	-2.07	0.0192	427	0.806	0.981	17503	1
OR56A1	-8.06	8	-2.07	0.0193	428	0.807	0.981	17502	1
ORAI3	-8.06	8	-2.07	0.0194	429	0.807	0.981	17501	1
SP5	-8.06	8	-2.07	0.0194	430	0.807	0.981	17500	1
ADAM17	-8.05	8	-2.07	0.0194	431	0.808	0.981	17499	1
SORT1	-8.04	8	-2.06	0.0196	432	0.813	0.98	17498	1
ATP6V0D1	-8.03	8	-2.06	0.0196	433	0.813	0.98	17497	1
RSPH3	-8.03	8	-2.06	0.0197	434	0.813	0.98	17496	1
EGFR	-8.03	8	-2.06	0.0197	435	0.813	0.98	17495	1
SPEF1	-8.02	8	-2.06	0.0199	436	0.815	0.98	17494	1
VWA5B1	-8.01	8	-2.05	0.0199	437	0.815	0.98	17493	1
TDRD1	-8.01	8	-2.05	0.02	438	0.815	0.98	17492	1
AKAP14	-8.01	8	-2.05	0.02	439	0.815	0.98	17491	1
TADA2B	-8	8	-2.05	0.0201	440	0.815	0.98	17490	1
CCNA1	-8	8	-2.05	0.0201	441	0.815	0.98	17489	1
B3GNT8	-8	8	-2.05	0.0201	442	0.815	0.98	17488	1
CCR7	-8	8	-2.05	0.0202	443	0.815	0.98	17487	1
TOP1	-7.99	8	-2.05	0.0202	444	0.815	0.98	17486	1
SLC38A4	-7.98	8	-2.05	0.0204	445	0.82	0.98	17485	1
HOXC6	-7.97	8	-2.04	0.0205	446	0.823	0.98	17484	1
RFX7	-7.96	8	-2.04	0.0206	447	0.825	0.979	17483	1
BABAM1	-7.96	8	-2.04	0.0206	448	0.825	0.979	17482	1
TSSK3	-7.96	8	-2.04	0.0207	449	0.825	0.979	17481	1
RNF4	-7.95	8	-2.04	0.0207	450	0.825	0.979	17480	1
RAB32	-7.93	8	-2.03	0.0211	451	0.836	0.979	17479	1
RND1	-7.93	8	-2.03	0.0211	452	0.836	0.979	17478	1
FBXO45	-7.92	8	-2.03	0.0212	453	0.837	0.979	17477	1
DDX6	-7.92	8	-2.03	0.0212	454	0.837	0.979	17476	1
KIRREL2	-7.91	8	-2.03	0.0213	455	0.837	0.979	17475	1
ATP6V1C1	-7.91	8	-2.03	0.0213	456	0.837	0.979	17474	1
FOXI1	-7.9	8	-2.03	0.0214	457	0.837	0.979	17473	1
FGFR1OP2	-7.9	8	-2.03	0.0214	458	0.837	0.979	17472	1
MAN1A1	-7.9	8	-2.02	0.0214	459	0.837	0.979	17471	1
TMEM219	-7.9	8	-2.02	0.0215	460	0.839	0.978	17470	1
BRK1	-7.89	8	-2.02	0.0216	461	0.84	0.978	17469	1
CXCR1	-7.86	8	-2.01	0.022	462	0.849	0.978	17468	1
FOXD2	-7.86	8	-2.01	0.022	463	0.849	0.978	17467	1
RASL10B	-7.86	8	-2.01	0.022	464	0.849	0.978	17466	1
SPOCK3	-7.86	8	-2.01	0.0221	465	0.851	0.978	17465	1
SIGLEC9	-7.83	8	-2.01	0.0224	466	0.856	0.978	17464	1
FDX1L	-7.83	8	-2.01	0.0224	467	0.856	0.978	17463	1
LRRTM2	-7.83	8	-2	0.0225	468	0.856	0.978	17462	1
EMC3	-7.83	8	-2	0.0225	469	0.856	0.978	17461	1
C21orf58	-7.83	8	-2	0.0225	470	0.856	0.978	17460	1
TMCO3	-7.83	8	-2	0.0225	471	0.856	0.977	17459	1
EDN2	-7.82	8	-2	0.0225	472	0.856	0.977	17458	1
SETD1A	-7.82	8	-2	0.0226	473	0.856	0.977	17457	1
RFC5	-7.82	8	-2	0.0226	474	0.856	0.977	17456	1
TRPC5	-7.81	8	-2	0.0228	475	0.86	0.977	17455	1
BTBD3	-7.8	8	-2	0.0229	476	0.86	0.977	17454	1
GGH	-7.8	8	-2	0.0229	477	0.86	0.977	17453	1
GLUL	-7.79	8	-1.99	0.0231	478	0.86	0.977	17452	1
CLASRP	-7.79	8	-1.99	0.0231	479	0.86	0.977	17451	1
RXFP3	-7.79	8	-1.99	0.0231	480	0.86	0.977	17450	1
KCNA10	-7.78	8	-1.99	0.0231	481	0.86	0.977	17449	1
MXD4	-7.78	8	-1.99	0.0232	482	0.86	0.977	17448	1
SLC39A9	-7.77	8	-1.99	0.0233	483	0.86	0.977	17447	1
KRT79	-7.77	8	-1.99	0.0233	484	0.86	0.977	17446	1
SLC25A28	-7.75	8	-1.99	0.0236	485	0.86	0.976	17445	1
SAP30L	-7.75	8	-1.98	0.0236	486	0.86	0.976	17444	1
SIGIRR	-7.75	8	-1.98	0.0236	487	0.86	0.976	17443	1
FSIP2	-7.75	8	-1.98	0.0236	488	0.86	0.976	17442	1
ARL8B	-7.75	8	-1.98	0.0237	489	0.86	0.976	17441	1
ANKRD52	-6.71	6	-1.98	0.0237	490	0.86	0.976	17440	1
CDH1	-7.74	8	-1.98	0.0239	491	0.86	0.976	17439	1
C5orf48	-7.73	8	-1.98	0.0239	492	0.86	0.976	17438	1
DHX38	-7.73	8	-1.98	0.0239	493	0.86	0.976	17437	1
LRRC49	-7.73	8	-1.98	0.0239	494	0.86	0.976	17436	1
DPEP1	-7.73	8	-1.98	0.024	495	0.86	0.976	17435	1
ANO9	-7.73	8	-1.98	0.024	496	0.86	0.976	17434	1
OR6B2	-6.69	6	-1.98	0.024	497	0.86	0.976	17433	1
GMEB2	-7.72	8	-1.98	0.0241	498	0.86	0.976	17432	1
NIPAL3	-7.72	8	-1.98	0.0241	499	0.86	0.976	17431	1
IGFALS	-7.72	8	-1.97	0.0242	500	0.86	0.976	17430	1
KDM4D	-7.71	8	-1.97	0.0242	501	0.86	0.976	17429	1
KCNF1	-7.71	8	-1.97	0.0242	502	0.86	0.976	17428	1
CD81	-7.71	8	-1.97	0.0242	503	0.86	0.976	17427	1
RALYL	-7.71	8	-1.97	0.0242	504	0.86	0.976	17426	1
EBI3	-7.71	8	-1.97	0.0243	505	0.86	0.976	17425	1
ADAM10	-7.7	8	-1.97	0.0244	506	0.86	0.976	17424	1
LAMA5	-7.7	8	-1.97	0.0244	507	0.86	0.976	17423	1
TRIP10	-7.7	8	-1.97	0.0244	508	0.86	0.976	17422	1
GRIN2C	-7.69	8	-1.97	0.0245	509	0.862	0.975	17421	1
TIMM10	-7.69	8	-1.97	0.0246	510	0.862	0.975	17420	1
RAP1GAP2	-7.69	8	-1.97	0.0246	511	0.862	0.975	17419	1
RAB31	-7.68	8	-1.97	0.0247	512	0.863	0.975	17418	1
LPAR5	-7.68	8	-1.97	0.0247	513	0.863	0.975	17417	1
WNK1	-7.67	8	-1.96	0.0249	514	0.866	0.975	17416	1
ZSWIM2	-7.67	8	-1.96	0.0249	515	0.866	0.975	17415	1
HOXD12	-7.67	8	-1.96	0.0249	516	0.866	0.975	17414	1
GANAB	-7.66	8	-1.96	0.025	517	0.867	0.975	17413	1
SERBP1	-7.66	8	-1.96	0.0251	518	0.868	0.975	17412	1
ATP6V0A1	-7.65	8	-1.96	0.0252	519	0.869	0.975	17411	1
SSSCA1	-7.65	8	-1.96	0.0252	520	0.869	0.975	17410	1
KIAA1324	-7.65	8	-1.96	0.0253	521	0.869	0.975	17409	1
NEGR1	-7.62	8	-1.95	0.0256	522	0.879	0.974	17408	1
CCSAP	-7.62	8	-1.95	0.0256	523	0.879	0.974	17407	1
SARNP	-7.62	8	-1.95	0.0257	524	0.88	0.974	17406	1
PM20D1	-7.61	8	-1.95	0.0258	525	0.88	0.974	17405	1
TMEM86B	-7.61	8	-1.94	0.0259	526	0.88	0.974	17404	1
C14orf79	-6.59	6	-1.94	0.0259	527	0.88	0.974	17403	1
CDHR4	-7.6	8	-1.94	0.026	528	0.88	0.974	17402	1
ARR3	-7.6	8	-1.94	0.026	529	0.88	0.974	17401	1
TECTB	-7.6	8	-1.94	0.026	530	0.88	0.974	17400	1
HSPA12B	-7.59	8	-1.94	0.0262	531	0.882	0.974	17399	1
HELB	-7.59	8	-1.94	0.0263	532	0.882	0.974	17398	1
RNASEL	-7.58	8	-1.94	0.0263	533	0.882	0.974	17397	1
POU4F2	-7.58	8	-1.94	0.0263	534	0.882	0.974	17396	1
LRRC30	-7.58	8	-1.94	0.0264	535	0.882	0.974	17395	1
NAGPA	-7.58	8	-1.94	0.0264	536	0.882	0.974	17394	1
CRX	-7.58	8	-1.94	0.0264	537	0.882	0.974	17393	1
LILRB3	-3.78	2	-1.93	0.0265	538	0.884	0.973	17392	1
OR6K6	-7.56	8	-1.93	0.0266	539	0.884	0.973	17391	1
ARL15	-7.56	8	-1.93	0.0267	540	0.884	0.973	17390	1
KPNA3	-7.56	8	-1.93	0.0267	541	0.884	0.973	17389	1
GCH1	-7.55	8	-1.93	0.0268	542	0.884	0.973	17388	1
IGJ	-7.55	8	-1.93	0.0268	543	0.884	0.973	17387	1
RNF219	-7.55	8	-1.93	0.0269	544	0.885	0.973	17386	1
OPN1LW	-3.77	2	-1.93	0.0269	545	0.885	0.973	17385	1
FKBP5	-7.54	8	-1.93	0.027	546	0.885	0.973	17384	1
SLC9A2	-7.53	8	-1.93	0.0271	547	0.889	0.973	17383	1
TRAK1	-7.52	8	-1.92	0.0273	548	0.889	0.973	17382	1
KIAA1737	-7.52	8	-1.92	0.0273	549	0.889	0.973	17381	1
TCEAL8	-7.52	8	-1.92	0.0273	550	0.889	0.973	17380	1
RFC3	-7.52	8	-1.92	0.0274	551	0.889	0.973	17379	1
TMEM151A	-7.52	8	-1.92	0.0274	552	0.889	0.973	17378	1
CCDC13	-7.51	8	-1.92	0.0274	553	0.89	0.973	17377	1
GRASP	-7.51	8	-1.92	0.0276	554	0.893	0.972	17376	1
ZNF157	-7.5	8	-1.92	0.0277	555	0.895	0.972	17375	1
CLPTM1L	-7.49	8	-1.91	0.0278	556	0.896	0.972	17374	1
IFNAR1	-7.48	8	-1.91	0.028	557	0.896	0.972	17373	1
FBXL6	-7.48	8	-1.91	0.028	558	0.896	0.972	17372	1
RAP1B	-3.74	2	-1.91	0.0281	559	0.896	0.972	17371	1
ZNF592	-7.48	8	-1.91	0.0281	560	0.896	0.972	17370	1
HNRNPF	-7.48	8	-1.91	0.0281	561	0.896	0.972	17369	1
FLNA	-7.48	8	-1.91	0.0281	562	0.896	0.972	17368	1
BLM	-7.47	8	-1.91	0.0281	563	0.896	0.972	17367	1
CLTA	-7.47	8	-1.91	0.0282	564	0.896	0.972	17366	1
CPNE8	-7.47	8	-1.91	0.0282	565	0.896	0.972	17365	1
U2AF1	-7.45	8	-1.9	0.0285	566	0.896	0.971	17364	1
NPC1L1	-7.45	8	-1.9	0.0286	567	0.896	0.971	17363	1
TMEM92	-7.45	8	-1.9	0.0286	568	0.896	0.971	17362	1
PSD2	-7.44	8	-1.9	0.0287	569	0.896	0.971	17361	1
NPAS1	-7.44	8	-1.9	0.0288	570	0.896	0.971	17360	1
LRCH3	-7.43	8	-1.9	0.0288	571	0.896	0.971	17359	1
RASSF4	-7.43	8	-1.9	0.0289	572	0.896	0.971	17358	1
NRL	-7.42	8	-1.9	0.029	573	0.896	0.971	17357	1
SMG7	-7.42	8	-1.89	0.0291	574	0.896	0.971	17356	1
RERG	-7.42	8	-1.89	0.0291	575	0.896	0.971	17355	1
PPDPF	-7.41	8	-1.89	0.0292	576	0.896	0.971	17354	1
MAP2K1	-7.41	8	-1.89	0.0293	577	0.896	0.971	17353	1
CCDC41	-7.41	8	-1.89	0.0293	578	0.896	0.971	17352	1
NTN1	-7.41	8	-1.89	0.0294	579	0.896	0.971	17351	1
TNFRSF10A	-7.41	8	-1.89	0.0294	580	0.896	0.971	17350	1
L3HYPDH	-7.4	8	-1.89	0.0294	581	0.896	0.971	17349	1
HIST1H2BA	-7.4	8	-1.89	0.0294	582	0.896	0.971	17348	1
ALDH1A3	-7.4	8	-1.89	0.0294	583	0.896	0.971	17347	1
POLDIP3	-7.4	8	-1.89	0.0295	584	0.896	0.971	17346	1
TMPO	-7.4	8	-1.89	0.0296	585	0.896	0.97	17345	1
ZNF561	-7.4	8	-1.89	0.0296	586	0.896	0.97	17344	1
ZNF74	-7.39	8	-1.89	0.0296	587	0.896	0.97	17343	1
TTK	-7.39	8	-1.89	0.0296	588	0.896	0.97	17342	1
MT4	-6.4	6	-1.88	0.0297	589	0.896	0.97	17341	1
CBX7	-7.39	8	-1.88	0.0297	590	0.896	0.97	17340	1
2021-09-08	-7.38	8	-1.88	0.0297	591	0.896	0.97	17339	1
ASAH1	-7.38	8	-1.88	0.0297	592	0.896	0.97	17338	1
NDRG4	-7.38	8	-1.88	0.0298	593	0.896	0.97	17337	1
C11orf94	-7.38	8	-1.88	0.0298	594	0.896	0.97	17336	1
HDDC2	-7.38	8	-1.88	0.0298	595	0.896	0.97	17335	1
APOA4	-7.38	8	-1.88	0.0299	596	0.896	0.97	17334	1
CCSER1	-7.38	8	-1.88	0.0299	597	0.896	0.97	17333	1
SEC31B	-7.37	8	-1.88	0.0299	598	0.896	0.97	17332	1
HSCB	-7.37	8	-1.88	0.0299	599	0.896	0.97	17331	1
HRH1	-7.37	8	-1.88	0.03	600	0.896	0.97	17330	1
POU3F4	-7.36	8	-1.88	0.0302	601	0.896	0.97	17329	1
UGT1A9	-3.68	2	-1.88	0.0302	602	0.896	0.97	17328	1
GOT1L1	-7.36	8	-1.88	0.0302	603	0.896	0.97	17327	1
RELT	-7.36	8	-1.88	0.0302	604	0.896	0.97	17326	1
NCBP2	-6.88	7	-1.88	0.0303	605	0.896	0.97	17325	1
CD27	-7.36	8	-1.88	0.0303	606	0.896	0.97	17324	1
EIF3G	-7.35	8	-1.88	0.0304	607	0.897	0.97	17323	1
FOXP3	-7.35	8	-1.87	0.0304	608	0.897	0.97	17322	1
EDF1	-7.35	8	-1.87	0.0305	609	0.897	0.97	17321	1
WRAP53	-7.34	8	-1.87	0.0306	610	0.899	0.969	17320	1
DLC1	-7.33	8	-1.87	0.0307	611	0.899	0.969	17319	1
LRRIQ3	-7.33	8	-1.87	0.0307	612	0.899	0.969	17318	1
CLDND1	-7.33	8	-1.87	0.0308	613	0.901	0.969	17317	1
TPBG	-7.32	8	-1.87	0.0309	614	0.902	0.969	17316	1
CIB1	-7.31	8	-1.87	0.0311	615	0.902	0.969	17315	1
IP6K3	-7.31	8	-1.86	0.0311	616	0.902	0.969	17314	1
TSHR	-7.31	8	-1.86	0.0311	617	0.902	0.969	17313	1
PURA	-7.31	8	-1.86	0.0311	618	0.902	0.969	17312	1
DENND5A	-7.31	8	-1.86	0.0311	619	0.902	0.969	17311	1
LYSMD2	-7.31	8	-1.86	0.0312	620	0.902	0.969	17310	1
LOXL2	-7.3	8	-1.86	0.0313	621	0.903	0.969	17309	1
GPR37L1	-7.3	8	-1.86	0.0313	622	0.903	0.969	17308	1
IGFBP4	-7.29	8	-1.86	0.0315	623	0.906	0.968	17307	1
IDO2	-7.28	8	-1.86	0.0316	624	0.906	0.968	17306	1
SYNPR	-7.27	8	-1.85	0.0318	625	0.906	0.968	17305	1
UNC119B	-7.27	8	-1.85	0.0318	626	0.906	0.968	17304	1
MAPK8	-7.27	8	-1.85	0.0319	627	0.906	0.968	17303	1
UACA	-7.27	8	-1.85	0.0319	628	0.906	0.968	17302	1
DMAP1	-7.27	8	-1.85	0.0319	629	0.906	0.968	17301	1
PELI3	-7.27	8	-1.85	0.0319	630	0.906	0.968	17300	1
CACNA1S	-7.27	8	-1.85	0.032	631	0.906	0.968	17299	1
CEBPB	-7.27	8	-1.85	0.032	632	0.906	0.968	17298	1
CRLS1	-7.27	8	-1.85	0.032	633	0.906	0.968	17297	1
NFE2L3	-7.26	8	-1.85	0.0321	634	0.907	0.968	17296	1
SYCP3	-7.26	8	-1.85	0.0322	635	0.907	0.968	17295	1
NUP62CL	-7.25	8	-1.85	0.0323	636	0.907	0.968	17294	1
C11orf73	-7.25	8	-1.85	0.0323	637	0.907	0.968	17293	1
DPPA2	-7.24	8	-1.85	0.0324	638	0.907	0.968	17292	1
THBS4	-7.24	8	-1.85	0.0325	639	0.907	0.968	17291	1
SEPW1	-7.24	8	-1.84	0.0326	640	0.907	0.967	17290	1
NT5C1A	-7.24	8	-1.84	0.0326	641	0.907	0.967	17289	1
GATAD1	-7.24	8	-1.84	0.0326	642	0.907	0.967	17288	1
PRMT8	-7.23	8	-1.84	0.0327	643	0.907	0.967	17287	1
POLR3B	-7.23	8	-1.84	0.0328	644	0.907	0.967	17286	1
PTX4	-7.23	8	-1.84	0.0328	645	0.907	0.967	17285	1
INCENP	-7.22	8	-1.84	0.0328	646	0.907	0.967	17284	1
ADCK4	-7.22	8	-1.84	0.0329	647	0.907	0.967	17283	1
LAMA1	-7.22	8	-1.84	0.0329	648	0.907	0.967	17282	1
GPR183	-7.22	8	-1.84	0.033	649	0.907	0.967	17281	1
CST4	-6.25	6	-1.84	0.033	650	0.907	0.967	17280	1
DND1	-7.21	8	-1.84	0.033	651	0.907	0.967	17279	1
DUSP15	-7.21	8	-1.84	0.0331	652	0.907	0.967	17278	1
PTGFRN	-7.21	8	-1.84	0.0331	653	0.907	0.967	17277	1
CEP120	-7.21	8	-1.84	0.0332	654	0.907	0.967	17276	1
RAD23B	-7.2	8	-1.83	0.0333	655	0.907	0.967	17275	1
DSC1	-7.2	8	-1.83	0.0333	656	0.907	0.967	17274	1
MAGEB1	-7.2	8	-1.83	0.0333	657	0.907	0.967	17273	1
LBX1	-7.2	8	-1.83	0.0333	658	0.907	0.967	17272	1
TMEM101	-7.2	8	-1.83	0.0333	659	0.907	0.967	17271	1
TOMM7	-7.2	8	-1.83	0.0334	660	0.907	0.967	17270	1
OLIG1	-7.19	8	-1.83	0.0335	661	0.908	0.966	17269	1
GDNF	-7.19	8	-1.83	0.0336	662	0.908	0.966	17268	1
PPT2	-7.18	8	-1.83	0.0336	663	0.908	0.966	17267	1
PRAM1	-7.18	8	-1.83	0.0336	664	0.908	0.966	17266	1
FAM104A	-7.18	8	-1.83	0.0337	665	0.908	0.966	17265	1
OR3A1	-7.17	8	-1.83	0.0338	666	0.91	0.966	17264	1
ZNF215	-7.17	8	-1.83	0.0338	667	0.91	0.966	17263	1
MYF6	-7.17	8	-1.83	0.0339	668	0.91	0.966	17262	1
ADRBK2	-7.17	8	-1.83	0.034	669	0.91	0.966	17261	1
PAK6	-7.15	8	-1.82	0.0342	670	0.916	0.966	17260	1
SCAPER	-7.15	8	-1.82	0.0344	671	0.918	0.966	17259	1
SSH3	-7.14	8	-1.82	0.0345	672	0.919	0.965	17258	1
FAM159B	-7.14	8	-1.82	0.0346	673	0.919	0.965	17257	1
MCM10	-7.14	8	-1.82	0.0346	674	0.919	0.965	17256	1
ZNF277	-7.13	8	-1.82	0.0347	675	0.919	0.965	17255	1
PGK1	-7.13	8	-1.82	0.0347	676	0.919	0.965	17254	1
GPSM3	-7.13	8	-1.82	0.0347	677	0.919	0.965	17253	1
PNPLA7	-7.13	8	-1.81	0.0348	678	0.919	0.965	17252	1
PDZD9	-7.12	8	-1.81	0.0349	679	0.919	0.965	17251	1
SH2D3C	-7.12	8	-1.81	0.0349	680	0.919	0.965	17250	1
CNOT4	-7.12	8	-1.81	0.0349	681	0.919	0.965	17249	1
C1orf61	-7.12	8	-1.81	0.035	682	0.92	0.965	17248	1
HIST1H4C	-6.16	6	-1.81	0.0351	683	0.92	0.965	17247	1
ADAL	-7.11	8	-1.81	0.0351	684	0.92	0.965	17246	1
BRD3	-7.11	8	-1.81	0.0353	685	0.92	0.965	17245	1
OR2T27	-3.55	2	-1.81	0.0353	686	0.92	0.965	17244	1
PLA2G1B	-7.1	8	-1.81	0.0353	687	0.92	0.965	17243	1
GABRG2	-7.1	8	-1.81	0.0354	688	0.92	0.965	17242	1
SOD3	-7.1	8	-1.81	0.0354	689	0.92	0.965	17241	1
UEVLD	-7.09	8	-1.8	0.0356	690	0.92	0.964	17240	1
SCAMP2	-7.09	8	-1.8	0.0357	691	0.92	0.964	17239	1
SCARA3	-7.08	8	-1.8	0.0358	692	0.92	0.964	17238	1
KHDRBS2	-7.08	8	-1.8	0.0358	693	0.92	0.964	17237	1
FBXW9	-7.08	8	-1.8	0.0358	694	0.92	0.964	17236	1
PRAP1	-7.08	8	-1.8	0.0359	695	0.92	0.964	17235	1
C19orf25	-7.08	8	-1.8	0.0359	696	0.92	0.964	17234	1
SYVN1	-7.08	8	-1.8	0.0359	697	0.92	0.964	17233	1
C1QL3	-7.07	8	-1.8	0.0361	698	0.92	0.964	17232	1
SLMAP	-7.07	8	-1.8	0.0361	699	0.92	0.964	17231	1
OLR1	-7.06	8	-1.8	0.0361	700	0.92	0.964	17230	1
TMX1	-7.06	8	-1.8	0.0362	701	0.92	0.964	17229	1
TRIM47	-7.06	8	-1.8	0.0362	702	0.92	0.964	17228	1
NDUFB8	-7.06	8	-1.8	0.0362	703	0.92	0.964	17227	1
ATXN7L3B	-7.06	8	-1.8	0.0362	704	0.92	0.964	17226	1
FBXO47	-7.06	8	-1.8	0.0362	705	0.92	0.964	17225	1
DENND1A	-7.05	8	-1.79	0.0365	706	0.92	0.964	17224	1
SHROOM1	-7.05	8	-1.79	0.0365	707	0.92	0.964	17223	1
SIX5	-7.04	8	-1.79	0.0366	708	0.92	0.963	17222	1
ZNF93	-4.98	4	-1.79	0.0366	709	0.92	0.963	17221	1
FBXO5	-7.04	8	-1.79	0.0366	710	0.92	0.963	17220	1
GARS	-7.04	8	-1.79	0.0367	711	0.92	0.963	17219	1
ERLIN2	-7.04	8	-1.79	0.0367	712	0.92	0.963	17218	1
DNAJC28	-7.04	8	-1.79	0.0367	713	0.92	0.963	17217	1
HTRA4	-7.04	8	-1.79	0.0367	714	0.92	0.963	17216	1
MBTPS2	-6.09	6	-1.79	0.0368	715	0.92	0.963	17215	1
RASSF9	-7.04	8	-1.79	0.0368	716	0.92	0.963	17214	1
CHTOP	-7.03	8	-1.79	0.0368	717	0.92	0.963	17213	1
DAD1	-7.02	8	-1.79	0.0371	718	0.924	0.963	17212	1
CLCN3	-7.02	8	-1.78	0.0372	719	0.924	0.963	17211	1
ARL8A	-7.02	8	-1.78	0.0372	720	0.924	0.963	17210	1
HN1	-7.01	8	-1.78	0.0373	721	0.924	0.963	17209	1
CHST2	-7	8	-1.78	0.0374	722	0.924	0.963	17208	1
TIMM8B	-6.99	8	-1.78	0.0377	723	0.924	0.962	17207	1
GCN1L1	-6.99	8	-1.78	0.0378	724	0.924	0.962	17206	1
HSP90AA1	-6.99	8	-1.78	0.0378	725	0.924	0.962	17205	1
PCGF2	-6.99	8	-1.78	0.0378	726	0.924	0.962	17204	1
CCDC126	-6.99	8	-1.78	0.0378	727	0.924	0.962	17203	1
SSTR1	-6.99	8	-1.78	0.0378	728	0.924	0.962	17202	1
CST9L	-6.05	6	-1.78	0.0379	729	0.924	0.962	17201	1
BMP4	-6.99	8	-1.78	0.0379	730	0.924	0.962	17200	1
PRIMPOL	-6.98	8	-1.78	0.0379	731	0.924	0.962	17199	1
SRPX2	-6.98	8	-1.77	0.038	732	0.924	0.962	17198	1
PLLP	-6.98	8	-1.77	0.038	733	0.924	0.962	17197	1
WFDC10A	-4.93	4	-1.77	0.0381	734	0.924	0.962	17196	1
ZADH2	-6.97	8	-1.77	0.0382	735	0.924	0.962	17195	1
SFMBT2	-6.97	8	-1.77	0.0382	736	0.924	0.962	17194	1
PDHA1	-6.97	8	-1.77	0.0383	737	0.924	0.962	17193	1
NEK8	-6.97	8	-1.77	0.0383	738	0.924	0.962	17192	1
SLC17A6	-6.97	8	-1.77	0.0383	739	0.924	0.962	17191	1
TESK2	-6.96	8	-1.77	0.0383	740	0.924	0.962	17190	1
TREML4	-6.96	8	-1.77	0.0384	741	0.924	0.962	17189	1
CCNK	-6.51	7	-1.77	0.0385	742	0.924	0.962	17188	1
PHYHIPL	-6.96	8	-1.77	0.0385	743	0.924	0.962	17187	1
C12orf44	-6.95	8	-1.77	0.0386	744	0.924	0.961	17186	1
KISS1	-6.02	6	-1.77	0.0386	745	0.924	0.961	17185	1
ALB	-6.95	8	-1.77	0.0386	746	0.924	0.961	17184	1
RPL35A	-6.01	6	-1.76	0.0388	747	0.924	0.961	17183	1
NDC80	-6.94	8	-1.76	0.0388	748	0.924	0.961	17182	1
IQCH	-6.94	8	-1.76	0.0388	749	0.924	0.961	17181	1
C17orf64	-6.94	8	-1.76	0.0389	750	0.924	0.961	17180	1
MARS	-6.94	8	-1.76	0.039	751	0.924	0.961	17179	1
AK8	-6.94	8	-1.76	0.039	752	0.924	0.961	17178	1
AR	-6.94	8	-1.76	0.039	753	0.924	0.961	17177	1
KCNK16	-6.94	8	-1.76	0.039	754	0.924	0.961	17176	1
HERC4	-6.93	8	-1.76	0.0391	755	0.924	0.961	17175	1
APH1A	-6.93	8	-1.76	0.0392	756	0.924	0.961	17174	1
MRPL40	-6.92	8	-1.76	0.0393	757	0.924	0.961	17173	1
OR13H1	-6.92	8	-1.76	0.0393	758	0.924	0.961	17172	1
SLC36A3	-6.92	8	-1.76	0.0393	759	0.924	0.961	17171	1
TSPAN2	-6.92	8	-1.76	0.0393	760	0.924	0.961	17170	1
PIAS3	-6.92	8	-1.76	0.0394	761	0.924	0.961	17169	1
CDK8	-6.92	8	-1.76	0.0394	762	0.924	0.961	17168	1
ARFGAP3	-6.92	8	-1.76	0.0394	763	0.924	0.961	17167	1
PRTFDC1	-6.92	8	-1.76	0.0394	764	0.924	0.961	17166	1
PMPCA	-6.92	8	-1.76	0.0395	765	0.924	0.961	17165	1
SPEN	-6.91	8	-1.76	0.0396	766	0.924	0.96	17164	1
EXTL3	-6.9	8	-1.75	0.0397	767	0.924	0.96	17163	1
DNAH14	-6.9	8	-1.75	0.0397	768	0.924	0.96	17162	1
2021-09-09	-6.9	8	-1.75	0.0398	769	0.924	0.96	17161	1
CENPBD1	-6.9	8	-1.75	0.0398	770	0.924	0.96	17160	1
STX7	-6.9	8	-1.75	0.0398	771	0.924	0.96	17159	1
RPRD1B	-6.9	8	-1.75	0.0398	772	0.924	0.96	17158	1
C16orf78	-6.9	8	-1.75	0.0399	773	0.924	0.96	17157	1
CABP7	-5.97	6	-1.75	0.04	774	0.924	0.96	17156	1
EN2	-6.89	8	-1.75	0.0401	775	0.924	0.96	17155	1
DDHD2	-6.88	8	-1.75	0.0402	776	0.924	0.96	17154	1
MAFF	-6.88	8	-1.75	0.0402	777	0.924	0.96	17153	1
DNAH3	-6.88	8	-1.75	0.0402	778	0.924	0.96	17152	1
CYP46A1	-6.88	8	-1.75	0.0403	779	0.924	0.96	17151	1
OTOP1	-6.88	8	-1.75	0.0404	780	0.924	0.96	17150	1
MPP7	-6.87	8	-1.75	0.0405	781	0.924	0.96	17149	1
TRABD	-6.87	8	-1.74	0.0405	782	0.924	0.959	17148	1
TTC24	-6.87	8	-1.74	0.0405	783	0.924	0.959	17147	1
HPDL	-6.87	8	-1.74	0.0405	784	0.924	0.959	17146	1
PSME2	-6.87	8	-1.74	0.0406	785	0.924	0.959	17145	1
EYA3	-6.87	8	-1.74	0.0406	786	0.924	0.959	17144	1
ERI3	-6.87	8	-1.74	0.0406	787	0.924	0.959	17143	1
OR6C65	-6.87	8	-1.74	0.0406	788	0.924	0.959	17142	1
ZNF354B	-6.86	8	-1.74	0.0407	789	0.924	0.959	17141	1
LRRC23	-6.86	8	-1.74	0.0408	790	0.925	0.959	17140	1
C2orf88	-6.86	8	-1.74	0.0409	791	0.925	0.959	17139	1
KCNJ5	-6.86	8	-1.74	0.0409	792	0.925	0.959	17138	1
NEMF	-6.85	8	-1.74	0.041	793	0.925	0.959	17137	1
LMTK3	-6.85	8	-1.74	0.041	794	0.925	0.959	17136	1
TRIM56	-6.85	8	-1.74	0.041	795	0.925	0.959	17135	1
TPRXL	-5.93	6	-1.74	0.041	796	0.925	0.959	17134	1
PCDHB16	-6.84	8	-1.74	0.0413	797	0.928	0.959	17133	1
FHIT	-6.84	8	-1.74	0.0413	798	0.928	0.959	17132	1
MCM5	-6.83	8	-1.73	0.0414	799	0.93	0.959	17131	1
EXD3	-6.83	8	-1.73	0.0415	800	0.93	0.958	17130	1
MOB1A	-6.83	8	-1.73	0.0416	801	0.93	0.958	17129	1
THUMPD1	-6.82	8	-1.73	0.0417	802	0.93	0.958	17128	1
ETV3L	-6.82	8	-1.73	0.0417	803	0.93	0.958	17127	1
PLXDC1	-6.82	8	-1.73	0.0417	804	0.93	0.958	17126	1
BGLAP	-6.82	8	-1.73	0.0418	805	0.93	0.958	17125	1
ZNF674	-6.81	8	-1.73	0.0419	806	0.93	0.958	17124	1
ATP6V1H	-6.81	8	-1.73	0.0419	807	0.93	0.958	17123	1
CLMN	-6.81	8	-1.73	0.042	808	0.93	0.958	17122	1
FAM126B	-6.81	8	-1.73	0.042	809	0.93	0.958	17121	1
DACT2	-6.81	8	-1.73	0.0421	810	0.93	0.958	17120	1
PIEZO2	-6.8	8	-1.73	0.0421	811	0.93	0.958	17119	1
THRA	-6.8	8	-1.73	0.0421	812	0.93	0.958	17118	1
LCE3A	-6.8	8	-1.73	0.0422	813	0.93	0.958	17117	1
ATCAY	-6.8	8	-1.72	0.0423	814	0.93	0.958	17116	1
GBAS	-6.79	8	-1.72	0.0424	815	0.93	0.958	17115	1
WASF1	-6.79	8	-1.72	0.0425	816	0.93	0.958	17114	1
TRMT1L	-6.79	8	-1.72	0.0425	817	0.93	0.957	17113	1
NCKIPSD	-6.79	8	-1.72	0.0425	818	0.93	0.957	17112	1
ATG9A	-6.79	8	-1.72	0.0426	819	0.93	0.957	17111	1
UCHL1	-6.78	8	-1.72	0.0426	820	0.93	0.957	17110	1
PEMT	-6.78	8	-1.72	0.0426	821	0.93	0.957	17109	1
HEXB	-6.78	8	-1.72	0.0427	822	0.93	0.957	17108	1
GPSM2	-6.78	8	-1.72	0.0427	823	0.93	0.957	17107	1
PODNL1	-6.77	8	-1.72	0.0428	824	0.931	0.957	17106	1
MMRN2	-6.77	8	-1.72	0.0429	825	0.931	0.957	17105	1
NOTCH2	-6.77	8	-1.72	0.0429	826	0.931	0.957	17104	1
CYP8B1	-6.77	8	-1.72	0.043	827	0.931	0.957	17103	1
SLC16A12	-6.76	8	-1.71	0.0432	828	0.931	0.957	17102	1
RPL18A	-5.34	5	-1.71	0.0433	829	0.931	0.957	17101	1
TMEM181	-6.76	8	-1.71	0.0433	830	0.931	0.957	17100	1
GPRASP1	-6.75	8	-1.71	0.0434	831	0.931	0.957	17099	1
ZMIZ1	-6.75	8	-1.71	0.0434	832	0.931	0.957	17098	1
PTCHD4	-6.75	8	-1.71	0.0435	833	0.931	0.957	17097	1
GATSL3	-6.75	8	-1.71	0.0435	834	0.931	0.956	17096	1
PRRT1	-5.84	6	-1.71	0.0436	835	0.931	0.956	17095	1
FNBP1	-6.74	8	-1.71	0.0436	836	0.931	0.956	17094	1
P2RX3	-6.74	8	-1.71	0.0437	837	0.931	0.956	17093	1
EFCAB5	-6.74	8	-1.71	0.0437	838	0.931	0.956	17092	1
IKZF5	-6.74	8	-1.71	0.0437	839	0.931	0.956	17091	1
TGFB3	-6.74	8	-1.71	0.0437	840	0.931	0.956	17090	1
FTHL17	-6.74	8	-1.71	0.0438	841	0.931	0.956	17089	1
C1QL4	-5.83	6	-1.71	0.0438	842	0.931	0.956	17088	1
PHKA1	-6.74	8	-1.71	0.0438	843	0.931	0.956	17087	1
LRRC52	-6.74	8	-1.71	0.0438	844	0.931	0.956	17086	1
PIP	-4.76	4	-1.71	0.044	845	0.932	0.956	17085	1
KIFC1	-6.73	8	-1.71	0.044	846	0.932	0.956	17084	1
LYAR	-6.73	8	-1.71	0.0441	847	0.932	0.956	17083	1
PCLO	-6.72	8	-1.7	0.0441	848	0.932	0.956	17082	1
RHBDF1	-6.72	8	-1.7	0.0442	849	0.932	0.956	17081	1
BFAR	-6.72	8	-1.7	0.0442	850	0.932	0.956	17080	1
FSTL3	-6.72	8	-1.7	0.0442	851	0.932	0.956	17079	1
SLC7A5	-6.72	8	-1.7	0.0443	852	0.932	0.956	17078	1
GP1BA	-6.71	8	-1.7	0.0444	853	0.932	0.956	17077	1
IKZF2	-6.71	8	-1.7	0.0444	854	0.932	0.956	17076	1
POLR2B	-6.71	8	-1.7	0.0445	855	0.932	0.956	17075	1
APOBEC2	-6.71	8	-1.7	0.0446	856	0.932	0.955	17074	1
LRTM2	-6.71	8	-1.7	0.0446	857	0.932	0.955	17073	1
PSTPIP1	-6.7	8	-1.7	0.0446	858	0.932	0.955	17072	1
MAD2L1	-6.7	8	-1.7	0.0448	859	0.932	0.955	17071	1
FFAR1	-6.7	8	-1.7	0.0448	860	0.932	0.955	17070	1
DEGS1	-6.7	8	-1.7	0.0448	861	0.932	0.955	17069	1
ZNF18	-6.7	8	-1.7	0.0448	862	0.932	0.955	17068	1
MLEC	-6.69	8	-1.7	0.0449	863	0.932	0.955	17067	1
FAM84A	-6.69	8	-1.7	0.045	864	0.932	0.955	17066	1
FUT11	-6.69	8	-1.7	0.045	865	0.932	0.955	17065	1
CPD	-6.69	8	-1.7	0.045	866	0.932	0.955	17064	1
CHD2	-6.69	8	-1.69	0.0451	867	0.932	0.955	17063	1
ATP6AP1L	-6.68	8	-1.69	0.0451	868	0.932	0.955	17062	1
TEX19	-6.67	8	-1.69	0.0454	869	0.934	0.955	17061	1
GNMT	-6.67	8	-1.69	0.0454	870	0.934	0.955	17060	1
ENTHD1	-6.67	8	-1.69	0.0455	871	0.934	0.954	17059	1
ARHGDIB	-6.67	8	-1.69	0.0455	872	0.934	0.954	17058	1
NCF4	-6.67	8	-1.69	0.0455	873	0.934	0.954	17057	1
PAFAH1B3	-6.67	8	-1.69	0.0456	874	0.934	0.954	17056	1
LAMA4	-6.67	8	-1.69	0.0456	875	0.935	0.954	17055	1
SRL	-5.77	6	-1.69	0.0457	876	0.935	0.954	17054	1
PRDM14	-6.66	8	-1.69	0.0458	877	0.935	0.954	17053	1
THEG	-6.65	8	-1.69	0.0459	878	0.935	0.954	17052	1
NUGGC	-6.65	8	-1.69	0.046	879	0.935	0.954	17051	1
PHKB	-6.65	8	-1.69	0.046	880	0.935	0.954	17050	1
USP15	-6.65	8	-1.68	0.046	881	0.935	0.954	17049	1
PDLIM4	-6.65	8	-1.68	0.046	882	0.935	0.954	17048	1
NEIL1	-6.65	8	-1.68	0.0461	883	0.935	0.954	17047	1
PC	-6.64	8	-1.68	0.0462	884	0.935	0.954	17046	1
PWWP2B	-6.64	8	-1.68	0.0462	885	0.935	0.954	17045	1
LIMA1	-6.64	8	-1.68	0.0463	886	0.935	0.954	17044	1
TRDMT1	-6.63	8	-1.68	0.0465	887	0.935	0.954	17043	1
EWSR1	-6.63	8	-1.68	0.0466	888	0.935	0.953	17042	1
NUDT21	-6.63	8	-1.68	0.0466	889	0.935	0.953	17041	1
MLH1	-5.74	6	-1.68	0.0466	890	0.935	0.953	17040	1
MRPL45	-6.63	8	-1.68	0.0466	891	0.935	0.953	17039	1
CREBZF	-6.62	8	-1.68	0.0467	892	0.935	0.953	17038	1
C19orf38	-6.62	8	-1.68	0.0468	893	0.935	0.953	17037	1
SYAP1	-6.62	8	-1.68	0.0468	894	0.935	0.953	17036	1
ATRAID	-6.62	8	-1.68	0.0469	895	0.935	0.953	17035	1
SUCLA2	-6.61	8	-1.67	0.0471	896	0.935	0.953	17034	1
DEFB129	-6.61	8	-1.67	0.0471	897	0.935	0.953	17033	1
CCBL2	-6.61	8	-1.67	0.0472	898	0.935	0.953	17032	1
SPATA33	-6.18	7	-1.67	0.0472	899	0.935	0.953	17031	1
IL17RA	-6.6	8	-1.67	0.0473	900	0.935	0.953	17030	1
SAYSD1	-6.6	8	-1.67	0.0474	901	0.935	0.953	17029	1
ST3GAL1	-6.6	8	-1.67	0.0474	902	0.935	0.953	17028	1
SLC30A2	-6.59	8	-1.67	0.0475	903	0.935	0.953	17027	1
SURF2	-6.59	8	-1.67	0.0475	904	0.935	0.953	17026	1
TAPBPL	-6.59	8	-1.67	0.0475	905	0.935	0.952	17025	1
CNTFR	-6.59	8	-1.67	0.0476	906	0.935	0.952	17024	1
RPL15	-3.3	2	-1.67	0.0476	907	0.935	0.952	17023	1
NEUROD2	-6.59	8	-1.67	0.0476	908	0.935	0.952	17022	1
NMUR2	-6.59	8	-1.67	0.0477	909	0.935	0.952	17021	1
PPP1R3F	-6.58	8	-1.67	0.0478	910	0.935	0.952	17020	1
ARID4B	-6.58	8	-1.67	0.0478	911	0.935	0.952	17019	1
INPP5J	-6.58	8	-1.67	0.0478	912	0.935	0.952	17018	1
WIPI2	-6.58	8	-1.67	0.0478	913	0.935	0.952	17017	1
CELA3B	-3.29	2	-1.67	0.0479	914	0.935	0.952	17016	1
TMEM30B	-6.58	8	-1.66	0.048	915	0.935	0.952	17015	1
AFAP1	-6.57	8	-1.66	0.0481	916	0.935	0.952	17014	1
USP33	-6.57	8	-1.66	0.0481	917	0.935	0.952	17013	1
COIL	-6.57	8	-1.66	0.0482	918	0.935	0.952	17012	1
PRKCZ	-6.57	8	-1.66	0.0482	919	0.935	0.952	17011	1
XPO5	-6.57	8	-1.66	0.0483	920	0.935	0.952	17010	1
TRAF4	-6.56	8	-1.66	0.0483	921	0.935	0.952	17009	1
DICER1	-6.56	8	-1.66	0.0485	922	0.935	0.952	17008	1
CCR10	-6.56	8	-1.66	0.0485	923	0.935	0.951	17007	1
FAM114A1	-6.56	8	-1.66	0.0485	924	0.935	0.951	17006	1
CELA1	-6.56	8	-1.66	0.0486	925	0.935	0.951	17005	1
CTHRC1	-6.55	8	-1.66	0.0486	926	0.935	0.951	17004	1
MDM2	-6.55	8	-1.66	0.0486	927	0.935	0.951	17003	1
TNFRSF18	-6.55	8	-1.66	0.0487	928	0.935	0.951	17002	1
CYP51A1	-6.55	8	-1.66	0.0488	929	0.935	0.951	17001	1
C8orf47	-6.55	8	-1.66	0.0488	930	0.935	0.951	17000	1
MEIS1	-6.55	8	-1.66	0.0488	931	0.935	0.951	16999	1
ZNF280C	-6.54	8	-1.66	0.0489	932	0.935	0.951	16998	1
RNASEH2C	-6.54	8	-1.66	0.0489	933	0.935	0.951	16997	1
NOP16	-6.54	8	-1.66	0.0489	934	0.935	0.951	16996	1
WNT4	-6.54	8	-1.66	0.0489	935	0.935	0.951	16995	1
C9orf171	-6.54	8	-1.66	0.0489	936	0.935	0.951	16994	1
NR4A1	-6.54	8	-1.65	0.049	937	0.935	0.951	16993	1
KLF16	-6.54	8	-1.65	0.049	938	0.935	0.951	16992	1
SPRYD3	-6.54	8	-1.65	0.0491	939	0.935	0.951	16991	1
SIGLEC6	-6.53	8	-1.65	0.0492	940	0.935	0.951	16990	1
STRC	-6.53	8	-1.65	0.0492	941	0.935	0.951	16989	1
PAX8	-6.53	8	-1.65	0.0492	942	0.935	0.951	16988	1
LRRC40	-6.53	8	-1.65	0.0492	943	0.935	0.951	16987	1
POLR2J2	-3.26	2	-1.65	0.0494	944	0.935	0.951	16986	1
PNPLA1	-6.53	8	-1.65	0.0494	945	0.935	0.951	16985	1
ANAPC4	-6.53	8	-1.65	0.0494	946	0.935	0.951	16984	1
BZW1	-6.52	8	-1.65	0.0495	947	0.935	0.951	16983	1
SNED1	-6.52	8	-1.65	0.0496	948	0.935	0.95	16982	1
STX11	-6.52	8	-1.65	0.0496	949	0.935	0.95	16981	1
TCEAL4	-6.52	8	-1.65	0.0497	950	0.935	0.95	16980	1
C14orf142	-5.64	6	-1.65	0.0497	951	0.935	0.95	16979	1
SLC15A1	-6.51	8	-1.65	0.0498	952	0.935	0.95	16978	1
COX10	-6.51	8	-1.65	0.0499	953	0.935	0.95	16977	1
GALM	-6.51	8	-1.65	0.0499	954	0.935	0.95	16976	1
FAM21B	-3.25	2	-1.65	0.0499	955	0.935	0.95	16975	1
CABS1	-6.51	8	-1.65	0.05	956	0.935	0.95	16974	1
BBC3	-6.5	8	-1.64	0.05	957	0.935	0.95	16973	1
AC079612.1	-6.5	8	-1.64	0.05	958	0.935	0.95	16972	1
GAA	-6.5	8	-1.64	0.05	959	0.935	0.95	16971	1
KIAA1551	-6.5	8	-1.64	0.0501	960	0.935	0.95	16970	1
RNASEH2B	-6.5	8	-1.64	0.0502	961	0.935	0.95	16969	1
C16orf71	-6.49	8	-1.64	0.0502	962	0.935	0.95	16968	1
ATP7B	-6.49	8	-1.64	0.0505	963	0.935	0.95	16967	1
AC106876.2	-6.48	8	-1.64	0.0507	964	0.935	0.949	16966	1
HAND2	-6.48	8	-1.64	0.0507	965	0.935	0.949	16965	1
RPLP0	-6.06	7	-1.64	0.0507	966	0.935	0.949	16964	1
CASZ1	-6.48	8	-1.64	0.0508	967	0.935	0.949	16963	1
PTGIS	-6.47	8	-1.64	0.0508	968	0.935	0.949	16962	1
IQSEC3	-6.47	8	-1.64	0.0508	969	0.935	0.949	16961	1
MUTYH	-6.47	8	-1.64	0.0509	970	0.935	0.949	16960	1
ZDHHC1	-6.47	8	-1.64	0.0509	971	0.935	0.949	16959	1
LGALS4	-6.47	8	-1.64	0.0509	972	0.935	0.949	16958	1
SETD7	-6.47	8	-1.64	0.051	973	0.935	0.949	16957	1
SSX2IP	-6.47	8	-1.64	0.051	974	0.935	0.949	16956	1
[truncated: 16,955 more rows]

## Sheet: Supplementary File 1f
GENE	sumZ	numObs	normZ	pval_synth	rank_synth	fdr_synth	pval_supp	rank_supp	fdr_supp
[truncated: 17,928 more rows]
